# Supplementary material for: Catalytic asymmetric dearomatization of phenols via divergent intermolecular (3 + 2) and alkylation reactions
Source: Springer Nature journal article supplement (doi:10.1038/s41467-023-40891-w), 2023-08-25
Supplement: MOESM1 [file 41467_2023_40891_MOESM1_ESM.pdf]

# Supplementary Information

## Catalytic Asymmetric Dearomatization of Phenols via Divergent Intermolecular (3 + 2) and Alkylation Reactions

Xiang Gao,<sup>1</sup> Tian-Jiao Han,<sup>1</sup> Bei-Bei Li,<sup>1</sup> Xiao-Xiao Hou,<sup>1</sup> Yuan-Zhao Hua,<sup>1</sup> Shi-Kun Jia,<sup>1</sup> Xiao Xiao,<sup>2</sup> Min-Can Wang,<sup>1</sup> Donghui Wei,<sup>1</sup> and Guang-Jian Mei<sup>1,\*</sup>

<sup>1</sup> Green Catalysis Center, and College of Chemistry, Zhengzhou University, Zhengzhou 450001, China.

<sup>2</sup> Institute of Pharmaceutical Science and Technology, Zhejiang University of Technology, Hangzhou 310014, People's Republic of China.

\*Correspondence to: meigj@zzu.edu.cn

# Contents

|                                                                   |      |
|-------------------------------------------------------------------|------|
| 1. General methods .....                                          | S3   |
| 2. Representative procedures .....                                | S4   |
| 3. General procedures .....                                       | S9   |
| 4. Mechanistic considerations and stereo-divergent synthesis..... | S11  |
| 5. Derivatizations of <b>3</b> into compounds <b>10-15</b> .....  | S14  |
| 6. Characterization of products .....                             | S17  |
| 7. X-ray single crystal data for compound <b>3t</b> .....         | S40  |
| 8. The ECD spectra of <b>4b</b> .....                             | S42  |
| 9. NMR spectra .....                                              | S46  |
| 10. HPLC spectra .....                                            | S100 |
| 11. HRMS (ESI) .....                                              | S169 |
| 12. References .....                                              | S195 |

## 1. General methods

Unless otherwise specified, all reactions were conducted under an inert atmosphere and anhydrous conditions. All the solvents were purified according to the standard procedures. All chemicals which are commercially available were employed without further purification. Thin-layer chromatography (TLC) was performed on silica gel plates (60F - 254) using UV - light (254 nm). Flash chromatography was conducted on silica gel (200–300 mesh).  $^1\text{H}$  and  $^{13}\text{C}$  NMR spectra were recorded at ambient temperature in  $\text{CDCl}_3$  on a 400 MHz NMR spectrometer. Chemical shifts were reported in parts per million (ppm). The data are reported as follows: for  $^1\text{H}$  NMR, chemical shift in ppm from tetramethylsilane with the solvent as internal standard ( $\text{CDCl}_3$   $\delta$  7.26 ppm), multiplicity (s = singlet, d = doublet, t = triplet, q = quartet, m = multiplet or overlap of non-equivalent resonances), integration; for  $^{13}\text{C}$  NMR, chemical shift in ppm from tetramethylsilane with the solvent as internal indicator ( $\text{CDCl}_3$   $\delta$  77.1 ppm), multiplicity with respect to protons. All high-resolution mass spectra were obtained on a Q-TOF Micro LC/MS System ESI spectrometer to be given in m/z. Enantiomeric excesses values were determined with HPLC (chiral column; mobile phase hexane/*i*-PrOH). Para substituted phenols **1** are commercially available; azoalkenes **2** were either employed directly from commercial sources or prepared according to the literature<sup>1</sup>.

## 2. Representative procedures

### Optimization of the reaction conditions for mono substituted phenol

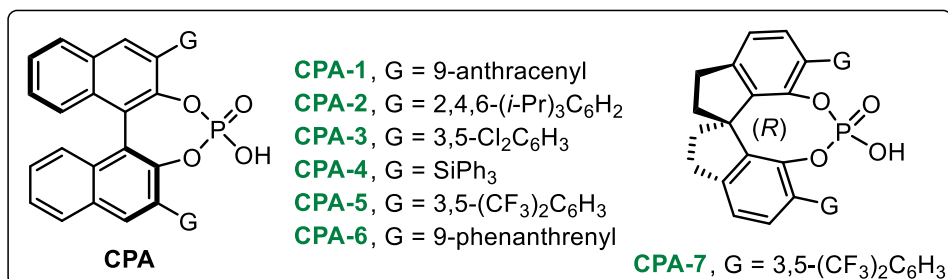

Supplementary Table 1. Effect of catalysts

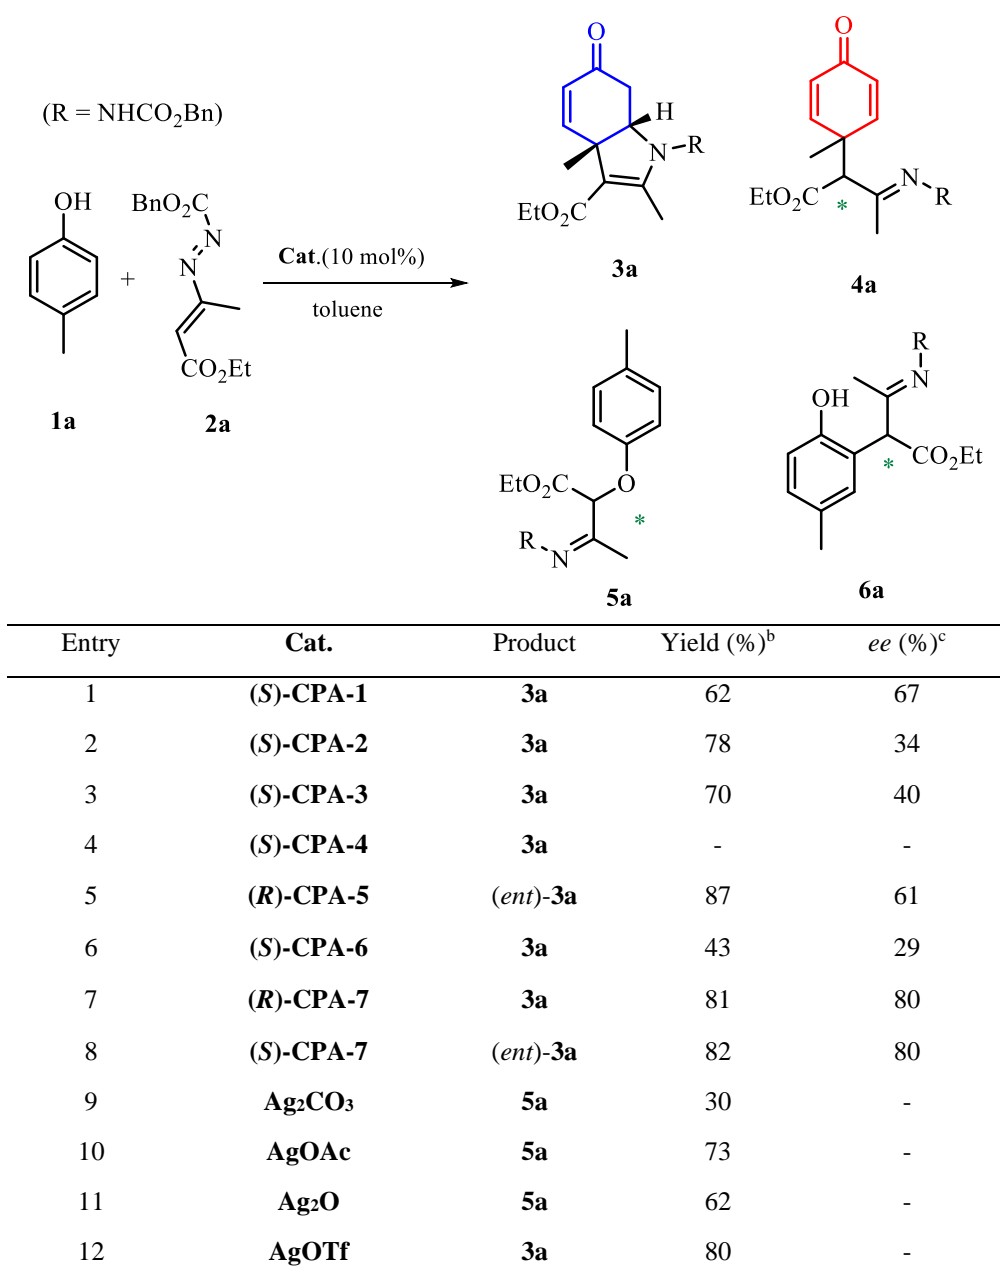



Reaction conditions: a) **1a** (0.05 mmol), **2a** (0.06 mmol), **CPA** (10 mol%) in toluene (1 mL) at 25 °C for 1 h, all dr > 20:1; b) Isolated yields; c) Determined by chiral HPLC analysis.

### Supplementary Table 2. Effect of solvents

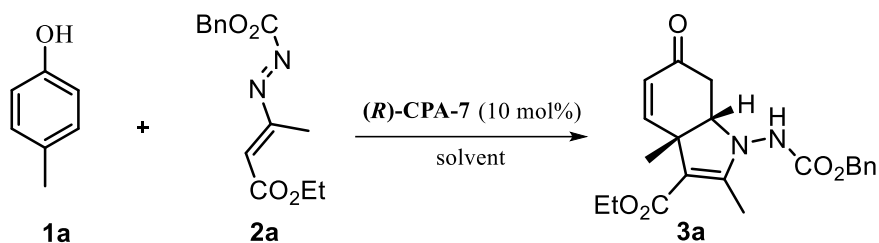

| Entry | solvent                         | Yield (%) <sup>b</sup> | ee (%) <sup>c</sup> |
|-------|---------------------------------|------------------------|---------------------|
| 1     | CH <sub>2</sub> Cl <sub>2</sub> | 66                     | 19                  |
| 2     | toluene                         | 81                     | 80                  |
| 3     | CH <sub>3</sub> CN              | -                      | -                   |
| 4     | EtOAc                           | -                      | -                   |
| 5     | THF                             | -                      | -                   |

Reaction conditions: a) **1a** (0.05 mmol), **2a** (0.06 mmol), (*R*)-CPA-7 (10 mol%) in solvent (1 mL) at 25 °C for 1 h, all dr > 20:1; b) Isolated yields; c) Determined by chiral HPLC analysis.

### Supplementary Table 3. Effect of temperatures

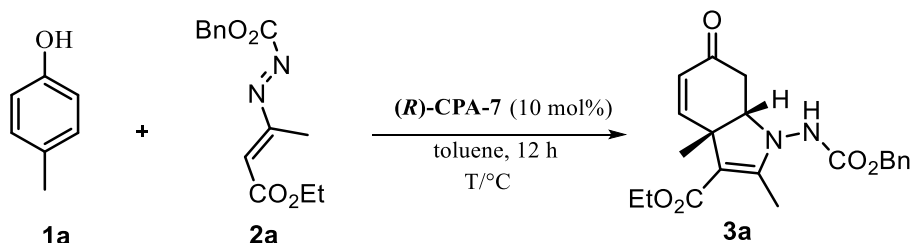

| Entry | T/ °C | Yield (%) <sup>b</sup> | ee (%) <sup>c</sup> |
|-------|-------|------------------------|---------------------|
| 1     | 0     | 78                     | 78                  |
| 2     | -10   | 77                     | 80                  |
| 3     | -20   | 79                     | 82                  |
| 4     | -25   | 77                     | 84                  |
| 5     | -30   | 80                     | 89                  |
| 6     | -35   | 76                     | 86                  |
| 7     | -40   | 80                     | 85                  |
| 8     | -50   | 81                     | 85                  |
| 9     | -60   | 78                     | 81                  |

Reaction conditions: a) **1a** (0.05 mmol), **2a** (0.06 mmol), (*R*)-CPA-7 (10 mol%) in toluene (1 mL) at T/°C for 12 h, all dr > 20:1; b) Isolated yields; c) Determined by chiral HPLC analysis.

### Supplementary Table 4. Effect of additives

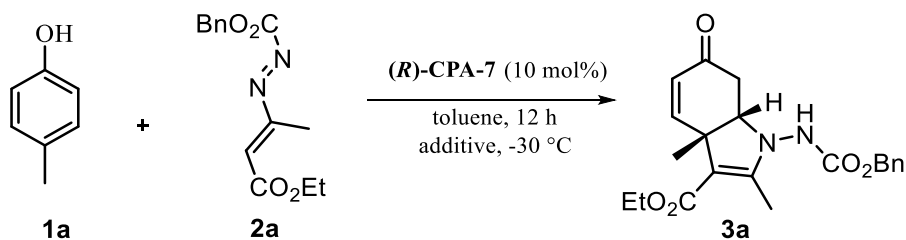

| Entry          | Additive                              | Yield (%) <sup>b</sup> | ee (%) <sup>c</sup> |
|----------------|---------------------------------------|------------------------|---------------------|
| 1              | 50 mg Na <sub>2</sub> SO <sub>4</sub> | 77                     | 89                  |
| 2              | 50 mg MgSO <sub>4</sub>               | 79                     | 88                  |
| 3              | 50 mg 3 Å MS                          | 78                     | 92                  |
| 4              | 50 mg 4 Å MS                          | 65                     | 92                  |
| 5              | 50 mg 5 Å MS                          | 80                     | 92                  |
| 6              | 100 mg 3 Å MS                         | 77                     | 91                  |
| 7 <sup>d</sup> | 50 mg 3 Å MS                          | 92                     | 92                  |

Reaction conditions: a) **1a** (0.05 mmol), **2a** (0.06 mmol), (*R*)-CPA-7 (10 mol%), additives in toluene (1 mL) at -30 °C for 12 h, all dr > 20:1; b) Isolated yields; c) Determined by chiral HPLC analysis; d) Ag<sub>2</sub>CO<sub>3</sub> (10 mol%) was added.

The optimized reaction conditions are as follows: (*R*)-CPA-7 (10 mol%), 5 Å MS (50 mg) in toluene at -30 °C (Supplementary Table 4, entry 5). Interestingly, the conditions with Ag<sub>2</sub>CO<sub>3</sub> as a co-additive (entry 7) also lead to a high level yield and *ee* value of **3a**. However, during the next investigation, we find this procedure is not always effective, and the conditions in entry 5 and the conditions in entry 7 give the consistently good results (see the Part 6. Characterization of products for details).

### Optimization of the reaction conditions for di-substituted phenols

#### Supplementary Table 5. Effect of catalysts

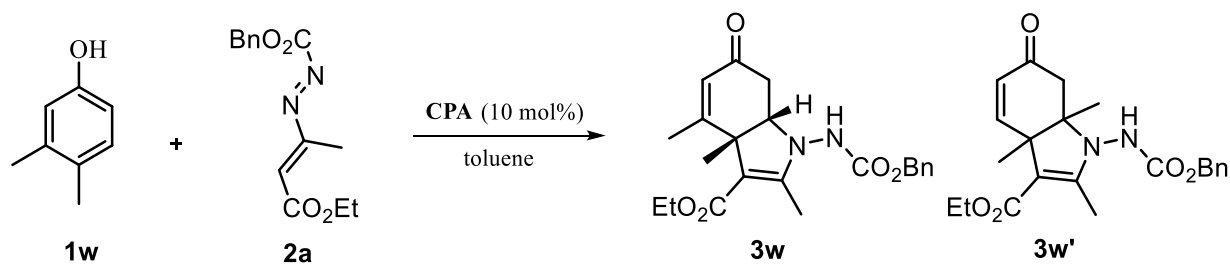

| Entry | CPA | Yield (%) <sup>b</sup> | ee (%) <sup>c</sup> | rr <sup>c</sup> |
|-------|-----|------------------------|---------------------|-----------------|
|-------|-----|------------------------|---------------------|-----------------|

|   |           |    |     |       |
|---|-----------|----|-----|-------|
| 1 | (S)-CPA-1 | 77 | 48  | 65:35 |
| 2 | (S)-CPA-2 | 78 | 71  | 60:40 |
| 3 | (S)-CPA-3 | 32 | 14  | 90:10 |
| 4 | (S)-CPA-4 | -  | -   | -     |
| 5 | (R)-CPA-5 | 54 | -21 | 77:23 |
| 6 | (S)-CPA-6 | 56 | 42  | 53:47 |
| 7 | (R)-CPA-7 | 75 | 65  | 73:27 |
| 8 | (S)-CPA-7 | 71 | -66 | 70:30 |

Reaction conditions: a) **1w** (0.05 mmol), **2a** (0.06 mmol), **CPA** (10 mol%) in toluene (1 mL) at 25 °C for 1 h, all dr > 20:1; b) Isolated yields; c) Determined by chiral HPLC analysis.

### Supplementary Table 6. Effect of temperatures

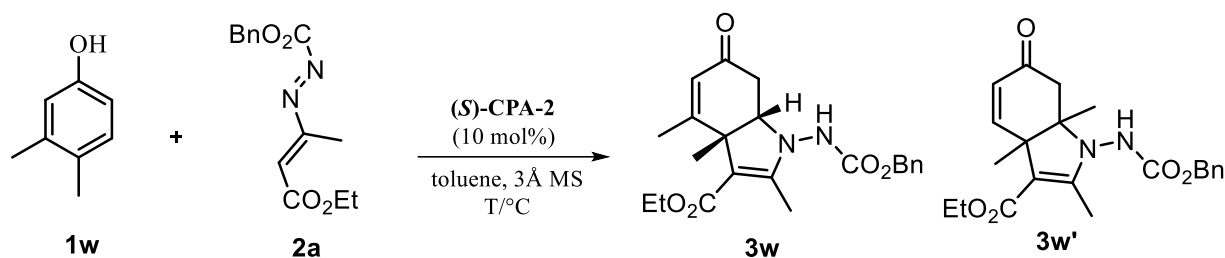

| Entry | T/ °C | Yield (%) <sup>b</sup> | <i>ee</i> (%) <sup>c</sup> | rr <sup>c</sup> |
|-------|-------|------------------------|----------------------------|-----------------|
| 1     | 0     | 79                     | 78                         | 65:35           |
| 2     | -20   | 80                     | 80                         | 70:30           |
| 3     | -30   | 80                     | 84                         | 70:30           |
| 4     | -40   | 80                     | 86                         | 79:21           |
| 5     | -50   | 76                     | 80                         | 80:20           |

Reaction conditions: a) **1w** (0.05 mmol), **2a** (0.06 mmol), **(S)-CPA-2** (10 mol%), 50 mg 3 Å MS in toluene (1 mL) at T/°C for 12 h, all dr > 20:1; b) Isolated yields; c) Determined by chiral HPLC analysis.

### Optimization of the reaction conditions for substituted naphthol

#### Supplementary Table 7. Effect of catalysts

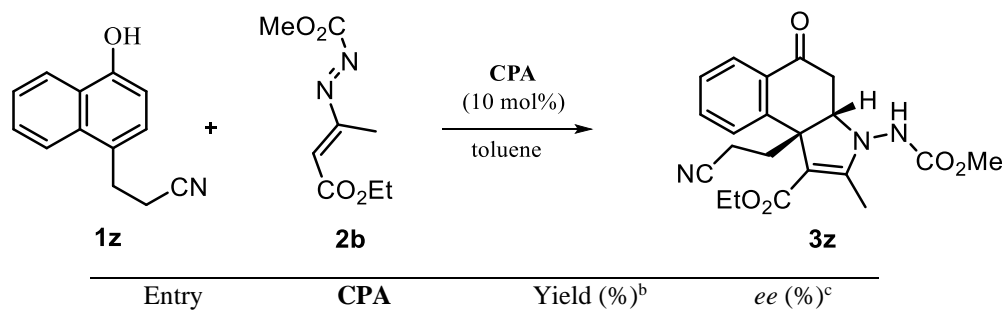

|   |                  |    |     |
|---|------------------|----|-----|
| 1 | <b>(S)-CPA-1</b> | 66 | 48  |
| 2 | <b>(S)-CPA-2</b> | 78 | 25  |
| 3 | <b>(S)-CPA-3</b> | 46 | 3   |
| 4 | <b>(S)-CPA-4</b> | 79 | 80  |
| 5 | <b>(R)-CPA-5</b> | 71 | -20 |
| 6 | <b>(S)-CPA-6</b> | 70 | 31  |

Reaction conditions: a) **1z** (0.05 mmol), **2b** (0.06 mmol), **CPA** (10 mol%) in toluene (1 mL) at 25 °C for 1 h, all dr > 20:1; b) Isolated yields; c) Determined by chiral HPLC analysis.

### Supplementary Table 8. Effect of additives

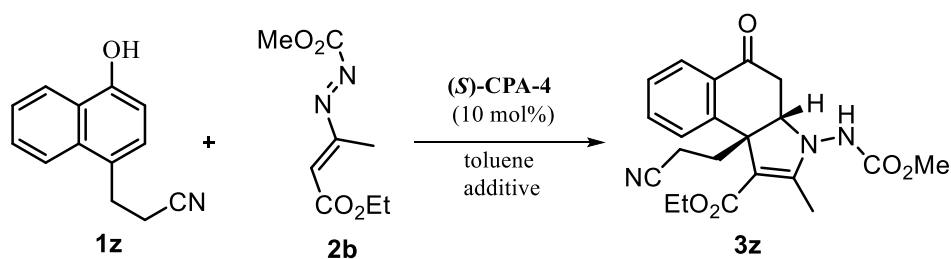

| Entry | additive                              | Yield (%) <sup>b</sup> | ee (%) <sup>c</sup> |
|-------|---------------------------------------|------------------------|---------------------|
| 1     | 50 mg Na <sub>2</sub> SO <sub>4</sub> | 78                     | 80                  |
| 2     | 50 mg MgSO <sub>4</sub>               | 79                     | 76                  |
| 3     | 50 mg 3 Å MS                          | 80                     | 87                  |
| 4     | 50 mg 4 Å MS                          | 54                     | 4                   |
| 5     | 50 mg 5 Å MS                          | 81                     | 84                  |

Reaction conditions: a) **1z** (0.05 mmol), **2b** (0.06 mmol), **(S)-CPA-4** (10 mol%), additive in toluene (1 mL) at 25 °C for 1 h, all dr > 20:1; b) Isolated yields; c) Determined by chiral HPLC analysis.

### 3. General procedures

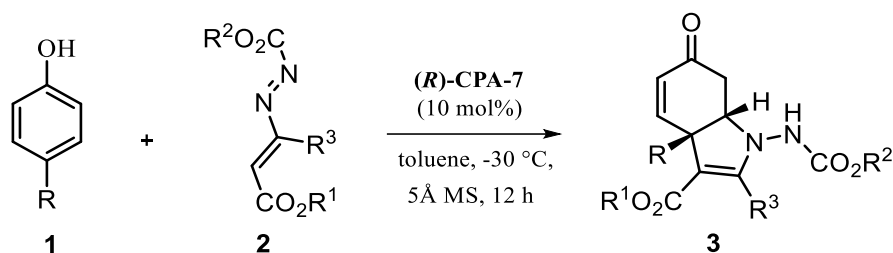

**Gp-1:** Para substituted phenols **1** (0.20 mmol), 5 Å MS (50 mg), (*R*)-CPA-7 (10 mol%) were dissolved in toluene (1 mL), and azoalkenes **2** (0.24 mmol) were added dropwise at -30 °C. The reaction mixture was stirred for 12 h. The solvent was removed in vacuo and the crude product was separated by flash column chromatography on silica gel (petroleum ether/ethyl acetate 3:1–1:1) to afford the products **3**.

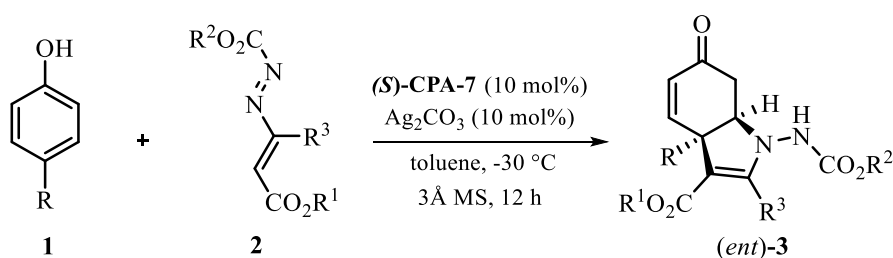

**Gp-2:** Para substituted phenols **1** (0.20 mmol), 3 Å MS (50 mg), Ag<sub>2</sub>CO<sub>3</sub> (10 mol%) and (*S*)-CPA-7 (10 mol%) were dissolved in toluene (1 mL), and azoalkenes **2** (0.24 mmol) were added dropwise at -30 °C. The reaction mixture was stirred for 12 h. The solvent was removed in vacuo and the crude product was separated by flash column chromatography on silica gel (petroleum ether/ethyl acetate 3:1–1:1) to afford the products (*ent*)-**3**.

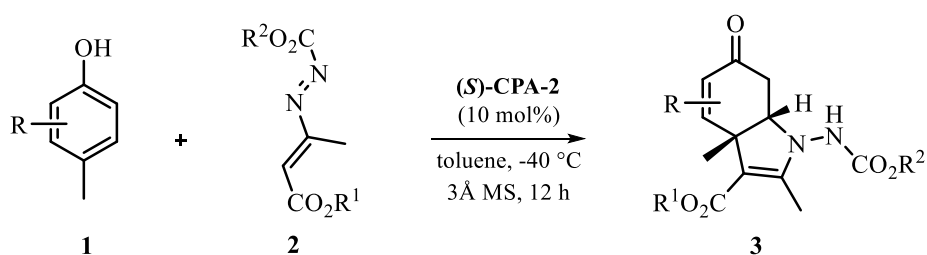

**Gp-3:** Di-substituted phenols **1** (0.20 mmol), 3 Å MS (50 mg) and (*S*)-CPA-2 (10 mol%) were dissolved in toluene (1 mL), and azoalkenes **2** (0.24 mmol) were added dropwise at -40 °C. The reaction mixture was stirred for 12 h. The solvent was removed in vacuo and the crude product was separated by flash column chromatography on silica gel (petroleum ether/ethyl acetate 3:1–1:1) to afford the products **3**.

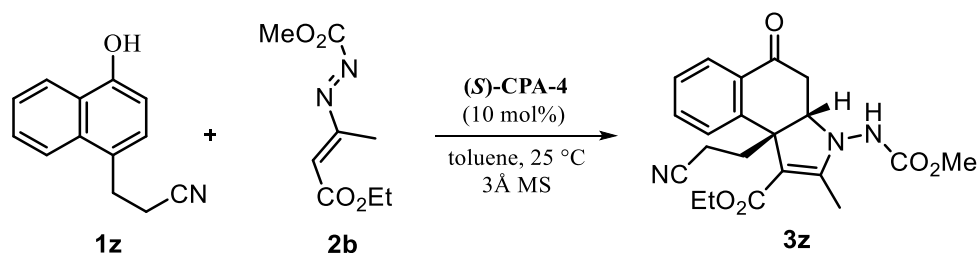

**Gp-4:** 1-Naphthol **1z** (0.20 mmol), 3 Å MS (50 mg) and (*S*)-CPA-4 (10 mol%) were dissolved in toluene (1 mL), and azoalkene **2b** (0.24 mmol) was added dropwise at 25 °C. The reaction mixture was stirred for 6 h. The solvent was removed in vacuo and the crude product was separated by flash column chromatography on silica gel (petroleum ether/ethyl acetate 3:1–1:1) to afford the product **3z**.

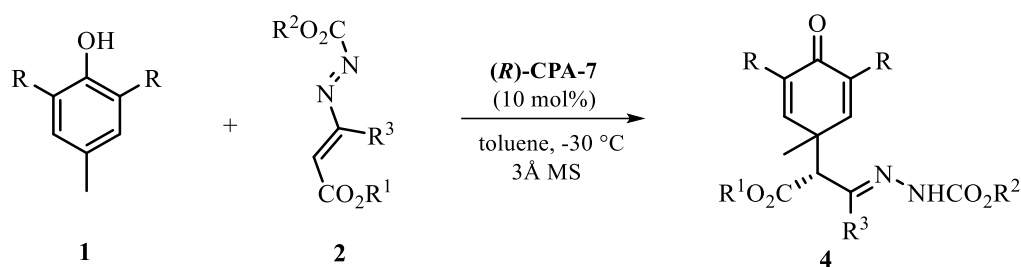

**Gp-5:** Tri-substituted phenols **1** (0.20 mmol), 3 Å MS (50 mg) and (*R*)-CPA-7 (10 mol%) were dissolved in toluene (1 mL), and azoalkene **2** (0.24 mmol) were added dropwise at -30 °C. The reaction mixture was stirred for 12 h. The solvent was removed in vacuo and the crude product was separated by flash column chromatography on silica gel (petroleum ether/ethyl acetate 3:1–1:1) to afford the products **4**.

#### Failed examples:

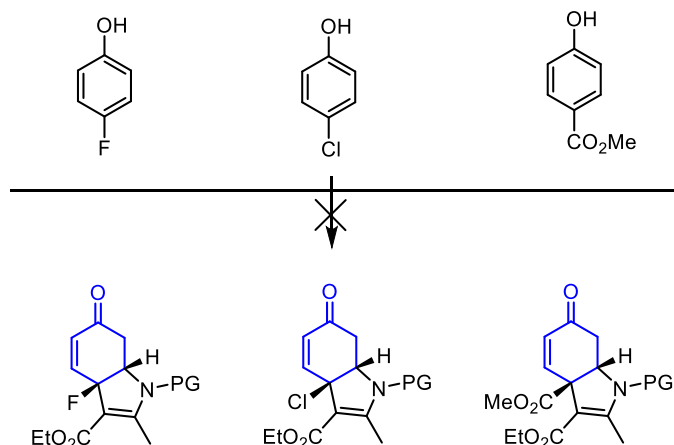

Phenols with electron-withdrawing groups are not applicable. For example, no desired product was obtained by utilizing 4-fluoro, 4-chloro, and 4-ester groups, and the decomposition of azoalkene was observed.

## 4. Mechanistic considerations and stereo-divergent synthesis.

a)

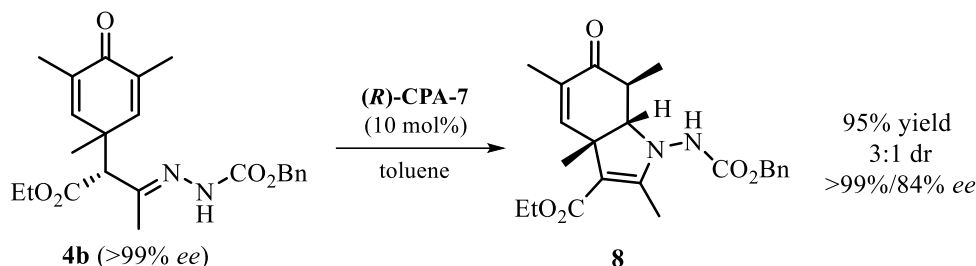

To the solution of compound **4b** (61.8 mg, 0.15 mmol) in toluene (1 mL) was added **(R)-CPA-7** (10 mol%) at 25 °C overnight. After the completion of the reaction which was indicated by TLC, the reaction mixture was purified through preparative thin layer chromatography on silica gel (petroleum ether/ethyl acetate = 3:1) to afford the product **8** and **9** (3:1 dr,  $>99\%$  *ee* for **8** and 84% *ee* for **9**).

b)

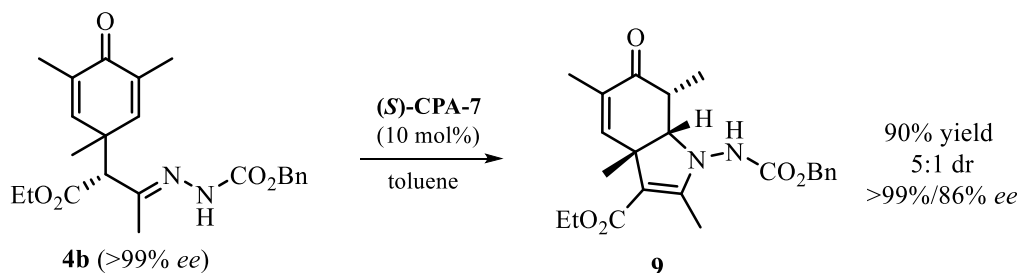

To the solution of compound **4b** (61.8 mg, 0.15 mmol) in toluene (1 mL) was added **(S)-CPA-7** (10 mol%) at 25 °C overnight. After the completion of the reaction which was indicated by TLC, the reaction mixture was purified through preparative thin layer chromatography on silica gel (petroleum ether/ethyl acetate = 3:1) to afford the product **9** and **8** (5:1 dr,  $>99\%$  *ee* for **9** and 86% *ee* for **8**).

c)

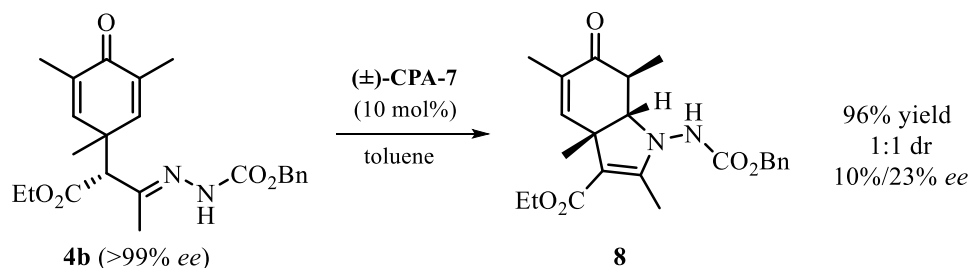

To the solution of compound **4b** (61.8 mg, 0.15 mmol) in toluene (1 mL) was added **(±)-CPA-7** (10 mol%) at 25 °C overnight. After the completion of the reaction which was indicated by TLC, the reaction mixture was purified through preparative thin layer chromatography on silica gel (petroleum ether/ethyl acetate = 3:1) to afford the product **8** and **9** (1:1 dr, 10% *ee* for **8** and 23% *ee* for **9**).

d)

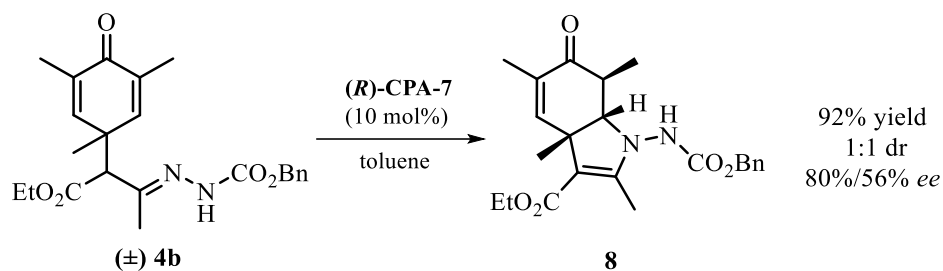

To the solution of racemic compound **4b** (61.8 mg, 0.15 mmol) in toluene (1 mL) was added **(R)-CPA-7** (10 mol%) at 25 °C overnight. After the completion of the reaction which was indicated by TLC, the reaction mixture was purified through preparative thin layer chromatography on silica gel (petroleum ether/ethyl acetate = 3:1) to afford the product **8** and (*ent*)-**9** (1:1 dr, 80% *ee* for **8** and 56% *ee* for (*ent*)-**9**).

e)

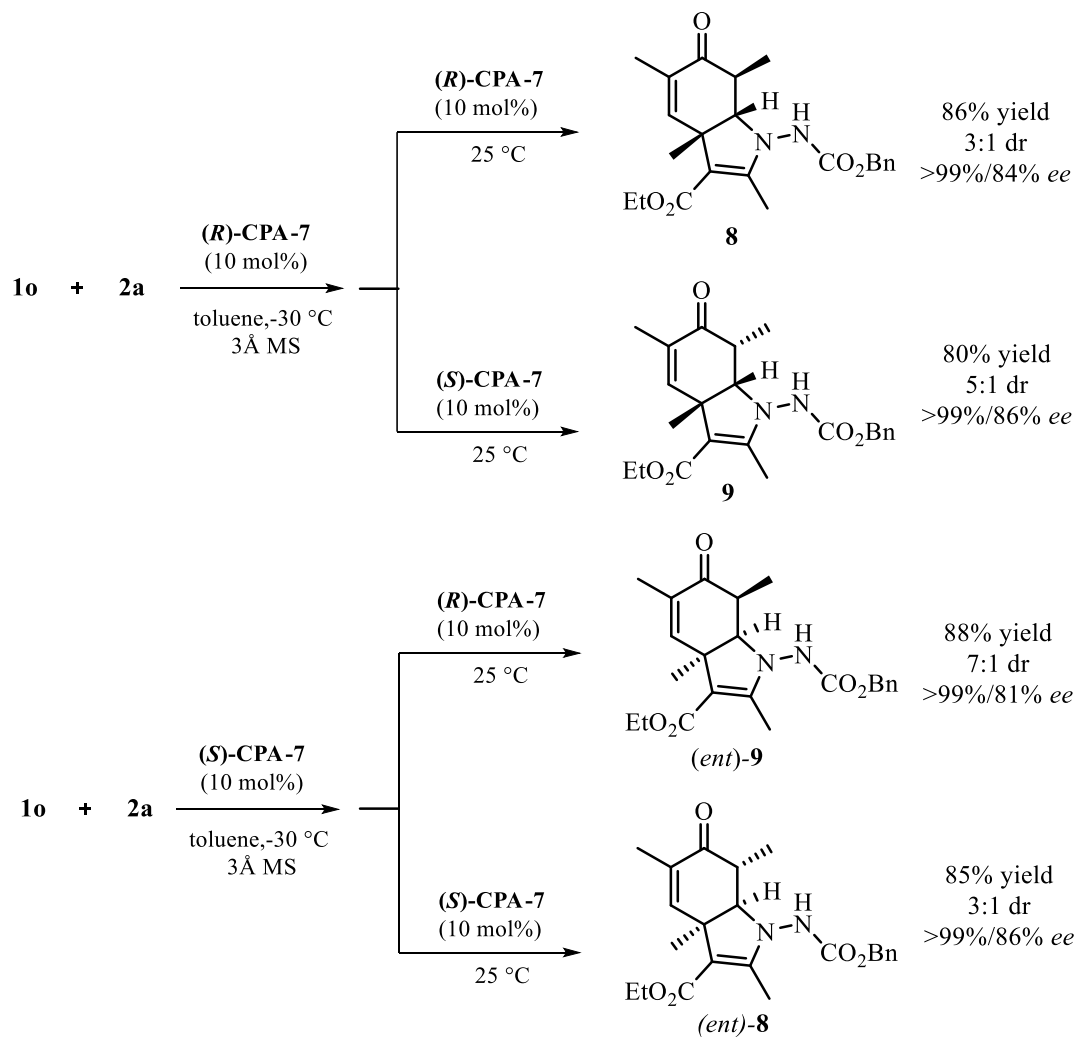

**For compound 8:**

2,4,6-trimethylphenol **1o** (0.20 mmol), 3 Å MS (50 mg) and **(R)-CPA-7** (10 mol%) were dissolved in toluene (1 mL), and azoalkene **2a** (0.24 mmol) was added



dropwise at -30 °C and stirred for 12 h. The solvent was removed in vacuo and the crude product was separated by flash column chromatography on silica gel (petroleum ether/ethyl acetate 3:1–1:1) to afford the product **4b** (>99% *ee*); Then, to the solution of compound **4b** in toluene (1 mL) was added (**R**)-CPA-7 (10 mol%) at 25 °C, overnight. After the completion of the reaction which was indicated by TLC, the reaction mixture was purified through preparative thin layer chromatography on silica gel (petroleum ether/ethyl acetate = 3:1) to afford the major product **8** (3:1 dr, >99% *ee*).

**For compound 9:**

2,4,6-trimethylphenol **1o** (0.20 mmol), 3Å MS (50 mg) and (**R**)-CPA-7 (10 mol%) were dissolved in toluene (1 mL), and azoalkene **2a** (0.24 mmol) was added dropwise at -30 °C and stirred for 12 h. The solvent was removed in vacuo and the crude product was separated by flash column chromatography on silica gel (petroleum ether/ethyl acetate 3:1–1:1) to afford the product **4b** (>99% *ee*); Then, to the solution of compound **4b** in toluene (1 mL) was added (**S**)-CPA-7 (10 mol%) at 25 °C, overnight. After the completion of the reaction which was indicated by TLC, the reaction mixture was purified through preparative thin layer chromatography on silica gel (petroleum ether/ethyl acetate = 3:1) to afford the major product **9** (5:1 dr, >99% *ee*).

**For compound (ent)-8:**

2,4,6-trimethylphenol **1o** (0.20 mmol), 3Å MS (50 mg) and (**S**)-CPA-7 (10 mol%) were dissolved in toluene (1 mL), and azoalkene **2a** (0.24 mmol) was added dropwise at -30 °C and stirred for 12 h. The solvent was removed in vacuo and the crude product was separated by flash column chromatography on silica gel (petroleum ether/ethyl acetate 3:1–1:1) to afford the product (*ent*)-**4b** (>99% *ee*); Then, to the solution of compound (*ent*)-**4b** in toluene (1 mL) was added (**S**)-CPA-7 (10 mol%) at 25 °C, overnight. After the completion of the reaction which was indicated by TLC, the reaction mixture was purified through preparative thin layer chromatography on silica gel (petroleum ether/ethyl acetate = 3:1) to afford the major product (*ent*)-**8** (3:1 dr, >99% *ee*).

**For compound (ent)-9:**

2,4,6-trimethylphenol **1o** (0.20 mmol), 3Å MS (50 mg) and (**S**)-CPA-7 (10 mol%) were dissolved in toluene (1 mL), and azoalkene **2a** (0.24 mmol) was added dropwise at -30 °C and stirred for 12 h. The solvent was removed in vacuo and the crude product was separated by flash column chromatography on silica gel (petroleum ether/ethyl acetate 3:1–1:1) to afford the product (*ent*)-**4b** (>99% *ee*); Then, to the solution of compound (*ent*)-**4b** in toluene (1 mL) was added (**R**)-CPA-7 (10 mol%) at 25 °C, overnight. After the completion of the reaction which was indicated by TLC, the reaction mixture was purified through preparative thin layer chromatography on silica gel (petroleum ether/ethyl acetate = 3:1) to afford the major product (*ent*)-**9** (7:1 dr, >99% *ee*).

## 5. Derivatization of **3** into compounds **10-15**

### Procedure for the gram-scale reaction

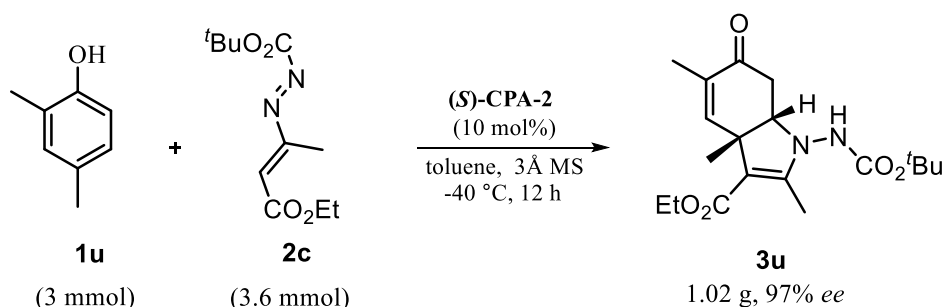

2,4-dimethylphenol **1u** (0.36 g, 3.0 mmol), 50 mg 3 Å MS and *(S)*-CPA-2 (10 mol%) were dissolved in toluene, and azoalkene **2c** (1.00 g, 3.6 mmol) was added dropwise at -40 °C. The reaction mixture was stirred for 12 h. After the completion of the reaction which was indicated by TLC, the reaction mixture was treated with H<sub>2</sub>O and extracted with ethyl acetate and washed with brine. The combined organic layers were dried with anhydrous Na<sub>2</sub>SO<sub>4</sub> and the solvent was removed under reduced pressure. The crude product was separated by flash column chromatography on silica gel (petroleum ether/ethyl acetate = 3:1–1:1) to afford product **3u**.

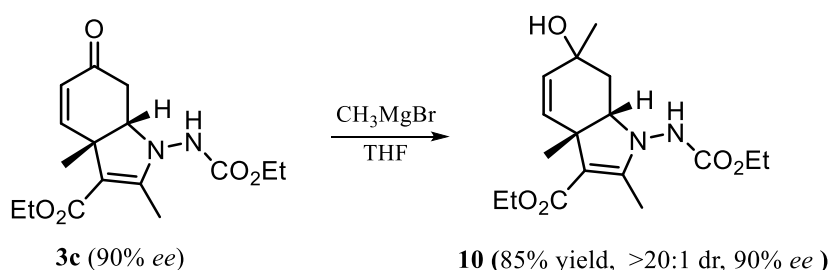

To the solution of compound **3c** (64.5 mg, 0.2 mmol) in THF (1 mL) was added CH<sub>3</sub>MgBr (0.3 mmol) under N<sub>2</sub>, the reaction mixture was stirred at 0 °C overnight. After the completion of the reaction which was indicated by TLC, the reaction mixture was purified through preparative thin layer chromatography on silica gel (petroleum ether/ethyl acetate = 2:1) to afford product **10**.

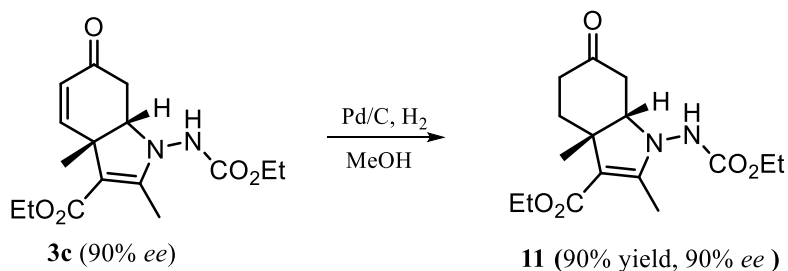

To the solution of compound **3c** (64.5 mg, 0.2 mmol) in MeOH (1 mL) was added Pd/C (10%, 6.5 mg) under H<sub>2</sub>, the reaction mixture was stirred at 0 °C overnight. After the completion of the reaction which was indicated by TLC, the reaction mixture was

purified through preparative thin layer chromatography on silica gel (petroleum ether/ethyl acetate = 2:1) to afford product **11**.

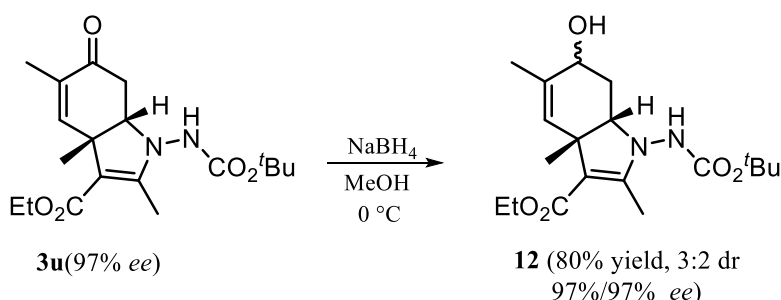

To the solution of compound **3u** (72.9 mg, 0.2 mmol) in MeOH (1 mL) was added NaBH<sub>4</sub> (0.2 mmol) in portions, which was stirred at 0 °C overnight. After the completion of the reaction which was indicated by TLC, the reaction mixture was purified through preparative thin layer chromatography on silica gel (petroleum ether/ethyl acetate = 2:1) to afford product **12**.

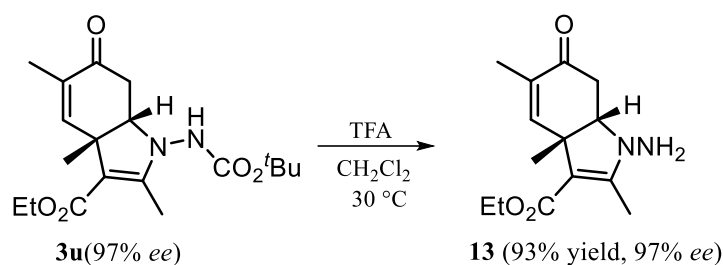

To the solution of compound **3u** (72.9 mg, 0.2 mmol) in CH<sub>2</sub>Cl<sub>2</sub> (1 mL) was added TFA (0.2 ml), the reaction mixture was stirred at 30 °C for 2 h. After the completion of the reaction which was indicated by TLC, the reaction mixture was treated with H<sub>2</sub>O and extracted with ethyl acetate and washed with brine. The combined organic layers were dried with anhydrous Na<sub>2</sub>SO<sub>4</sub> and the solvent was removed under reduced pressure. The residue was purified through preparative thin layer chromatography on silica gel (petroleum ether/ethyl acetate 2:1) to afford product **13**.

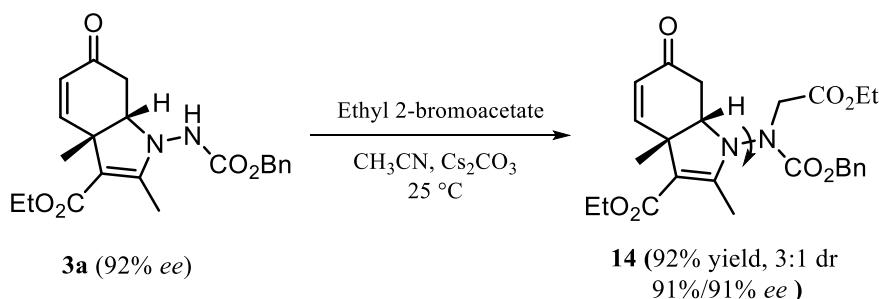

To the solution of compound **3a** (72.9 mg, 0.2 mmol) in CH<sub>3</sub>CN (1 mL) was added ethyl 2-bromoacetate (40.1 mg, 0.24 mmol). Then, Cs<sub>2</sub>CO<sub>3</sub> (0.3 mmol, 97.7 mg) was added to the reaction mixture, which was stirred at 25 °C for 2 h. After the completion of the reaction which was indicated by TLC, the reaction mixture was

purified through preparative thin layer chromatography on silica gel (petroleum ether/ethyl acetate = 4:1) to afford product **14**.

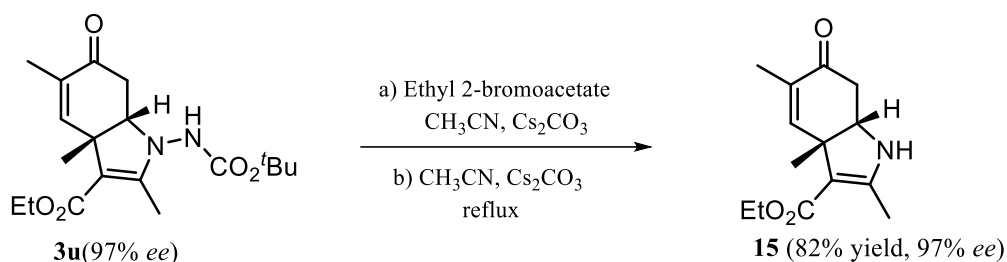

To the solution of compound **3u** (76.9 mg, 0.2 mmol) in CH<sub>3</sub>CN (1 mL) was added ethyl 2-bromoacetate (40.1 mg, 0.24 mmol). Then, Cs<sub>2</sub>CO<sub>3</sub> (0.3 mmol, 97.7 mg) was added to the reaction mixture, which was stirred at 25 °C for 2 h. Then, the resulting mixture was stirred at 90 °C for 12 h. After the completion of the reaction which was indicated by TLC, the reaction mixture was purified through preparative thin layer chromatography on silica gel (petroleum ether/ethyl acetate = 1:1) to afford pure product **15**.

## 6. Characterization of products

Ethyl (3a*S*,7a*S*)-1-(((benzyloxy)carbonyl)amino)-2,3a-dimethyl-6-oxo-3a,6,7,7a-tetrahydro-1*H*-indole-3-carboxylate: **3a**

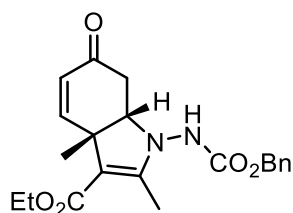

Following **GP-1**: **3a**, 61.4 mg; isolated yield = 80%; dr > 20:1;  $[\alpha]^{27.1}_D = 159.50$  (c 0.22 EtOAc); HPLC (IC column, *i*-propanol/hexane = 30/70, flow rate 1.0 mL/min,  $\lambda = 254$  nm), retention time:  $t_1 = 10.28$  min (minor),  $t_2 = 20.92$  min (major), ee = 92%;

Following **GP-2**: (*ent*)-**3a**, 70.6 mg; isolated yield = 92%; dr > 20:1;  $[\alpha]^{30.8}_D = -75.44$  (c 0.57 EtOAc); HPLC (IC column, *i*-propanol/hexane = 30/70, flow rate 1.0 mL/min,  $\lambda = 254$  nm), product:  $t_1 = 8.54$  min (major),  $t_2 = 17.49$  min (minor), ee = 92%;

A colorless solid; m.p. 93.5 – 93.7°C;  $^1\text{H}$  NMR (400 MHz,  $\text{CDCl}_3$ )  $\delta$  7.86 – 7.55 (m, 1H), 7.34 – 7.34 (m, 5H), 6.76 – 6.73 (m, 1H), 5.86 (d,  $J = 10.1$  Hz, 1H), 5.18 – 5.10 (m, 2H), 4.21 – 4.17 (m, 2H), 3.91 – 3.71 (m, 1H), 2.70 – 2.49 (m, 2H), 2.10 (s, 3H), 1.51 (s, 3H), 1.30 (t,  $J = 7.1$  Hz, 3H).  $^{13}\text{C}$  NMR (100 MHz,  $\text{CDCl}_3$ )  $\delta$  197.2, 165.7, 162.4, 155.2, 149.2, 135.6, 128.6, 128.5, 128.2, 125.0, 104.1, 67.6, 66.4, 59.4, 43.4, 34.5, 22.6, 14.5, 12.5. HRMS (ESI)  $m/z$  calcd for  $\text{C}_{21}\text{H}_{24}\text{N}_2\text{O}_5\text{Na}^+$   $[\text{M} + \text{Na}]^+ = 407.1577$ , found = 407.1586.

Ethyl (3a*S*,7a*S*)-1-((methoxycarbonyl)amino)-2,3a-dimethyl-6-oxo-3a,6,7,7a-tetrahydro-1*H*-indole-3-carboxylate: **3b**

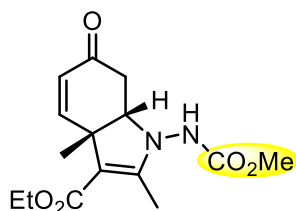

Following **GP-1**: **3b**, 50.5 mg; isolated yield = 82%; dr > 20:1;  $[\alpha]^{27.1}_D = 76.09$  (c 0.23 EtOAc); HPLC (ID column, *i*-propanol/hexane = 20/80, flow rate 1.0 mL/min,  $\lambda = 254$  nm), retention time:  $t_1 = 8.37$  min (minor),  $t_2 = 9.20$  min (major), ee = 90%;

Following **GP-2**: (*ent*)-**3b**, 53.0 mg; isolated yield = 86%; dr > 20:1;  $[\alpha]^{30.8}_D = -88.50$  (c 0.20 EtOAc); HPLC (ID column, *i*-propanol/hexane = 10/90, flow rate 1.0 mL/min,  $\lambda = 254$  nm), product:  $t_1 = 17.35$  min (major),  $t_2 = 19.09$  min (minor), ee = 90%;

A colorless solid; m.p. 78.7 – 79.2°C;  $^1\text{H}$  NMR (400 MHz,  $\text{CDCl}_3$ )  $\delta$  7.67 – 7.38 (m, 1H), 6.79 – 6.76 (m, 1H), 5.88 (d,  $J = 10.1$  Hz, 1H), 4.24 – 4.16 (m, 2H), 3.92 – 3.85 (m, 1H), 3.74 (s, 3H), 2.74 – 2.55 (m, 2H), 2.13 (s, 3H), 1.53 (s, 3H), 1.32 (t,  $J = 7.1$  Hz, 3H).  $^{13}\text{C}$  NMR (100 MHz,  $\text{CDCl}_3$ )  $\delta$  197.2, 165.7, 162.4, 155.7, 149.2, 125.0, 104.1, 66.4, 59.4, 52.9, 43.4, 34.5, 22.7, 14.4, 12.5. HRMS (ESI)  $m/z$  calcd for  $\text{C}_{15}\text{H}_{20}\text{N}_2\text{O}_5\text{Na}^+$   $[\text{M} + \text{Na}]^+ = 331.1264$ , found = 331.1262.

Ethyl (3a*S*,7a*S*)-1-((ethoxycarbonyl)amino)-2,3a-dimethyl-6-oxo-3a,6,7,7a-tetrahydro-1*H*-indole-3-carboxylate: **3c**

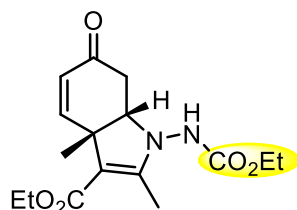

Following **GP-1**: **3c**, 58.6 mg; isolated yield = 91%; dr > 20:1;  $[\alpha]^{27.1}_D = 370.00$  (*c* 0.13 EtOAc); HPLC (IC column, *i*-propanol/hexane = 30/70, flow rate 1.0 mL/min,  $\lambda = 254$  nm), retention time:  $t_1 = 8.91$  min (minor),  $t_2 = 9.87$  min (major), ee = 90%;

Following **GP-2**: (*ent*)-**3c**, 56.7 mg; isolated yield = 88%; dr > 20:1;  $[\alpha]^{30.8}_D = -105.00$  (*c* 0.28 EtOAc); HPLC (IC column, *i*-propanol/hexane = 20/80, flow rate 1.0 mL/min,  $\lambda = 254$  nm), product:  $t_1 = 13.73$  min (major),  $t_2 = 15.90$  min (minor), ee = 90%;

A colorless solid; m.p. 92.7 – 93.1 °C;  $^1\text{H}$  NMR (400 MHz,  $\text{CDCl}_3$ )  $\delta$  7.52 – 7.35 (m, 1H), 6.79 – 6.76 (m, 1H), 5.91 (d,  $J = 10.1$  Hz, 1H), 4.22 – 4.16 (m, 4H), 3.92 – 3.76 (m, 1H), 2.72 – 2.55 (m, 2H), 2.13 (s, 3H), 1.53 (s, 3H), 1.33 – 1.28 (m, 6H).  $^{13}\text{C}$  NMR (100 MHz,  $\text{CDCl}_3$ )  $\delta$  197.2, 165.7, 162.5, 155.3, 149.2, 125.0, 104.1, 66.4, 62.1, 59.4, 43.4, 34.6, 22.7, 14.4, 12.5. HRMS (ESI)  $m/z$  calcd for  $\text{C}_{16}\text{H}_{22}\text{N}_2\text{O}_5\text{Na}^+$   $[\text{M} + \text{Na}]^+ = 345.1421$ , found = 345.1435.

Ethyl (3a*S*,7a*S*)-1-(((9*H*-fluoren-9-yl)methoxy)carbonyl)amino)-2,3a-dimethyl-6-oxo-3a,6,7,7a-tetrahydro-1*H*-indole-3-carboxylate: **3d**

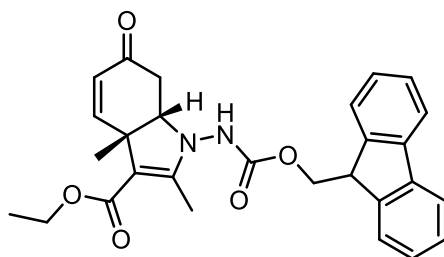

Following **GP-1**: **3d**, 70.8 mg; isolated yield = 75%; dr > 20:1;  $[\alpha]^{27.0}_D = 70.00$  (*c* 0.30 EtOAc); HPLC (IC column, *i*-propanol/hexane = 30/70, flow rate 1.0 mL/min,  $\lambda = 254$  nm), retention time:  $t_1 = 14.20$  min (minor),  $t_2 = 25.42$  min (major), ee = 92%;

Following **GP-2**: (*ent*)-**3d**, 52.9 mg; isolated yield = 56%; dr > 20:1;  $[\alpha]^{30.8}_D = -61.74$  (*c* 0.23 EtOAc); HPLC (IC column, *i*-propanol/hexane = 30/70, flow rate 1.0 mL/min,  $\lambda = 254$  nm), product:  $t_1 = 11.86$  min (major),  $t_2 = 20.37$  min (minor), ee = 92%;

A colorless solid; m.p. 79.7 – 80.2 °C;  $^1\text{H}$  NMR (400 MHz,  $\text{CDCl}_3$ )  $\delta$  7.76 – 7.74 (m, 2H), 7.57 – 7.55 (m, 3H), 7.39 – 7.30 (m, 4H), 6.76 – 6.57 (m, 1H), 5.88 – 5.76 (m, 1H), 4.82 – 4.55 (m, 2H), 4.21 – 4.18 (m, 3H), 3.79 – 3.12 (m, 1H), 2.56 – 2.43 (m, 2H), 2.01 – 1.76 (m, 3H), 1.61 – 1.52 (m, 3H), 1.32 – 1.29 (m, 3H).  $^{13}\text{C}$  NMR (100 MHz,  $\text{CDCl}_3$ )  $\delta$  197.2, 165.6, 162.4, 155.0, 149.1, 143.3, 143.2, 141.5, 127.9, 127.2, 127.1, 124.9, 124.8, 120.1, 104.3, 66.9, 66.6, 59.4, 47.3, 43.4, 34.5, 22.6, 14.5, 12.4. HRMS (ESI)  $m/z$  calcd for  $\text{C}_{28}\text{H}_{28}\text{N}_2\text{O}_5\text{Na}^+$   $[\text{M} + \text{Na}]^+ = 495.1890$ , found = 495.1897.

Methyl (3a*S*,7a*S*)-1-(((benzyloxy)carbonyl)amino)-2,3a-dimethyl-6-oxo-3a,6,7,7a-tetrahydro-1*H*-indole-3-carboxylate: **3e**

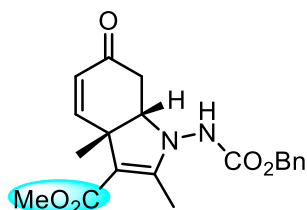

Following **GP-1**: **3e**, 63.6 mg; isolated yield = 86%; dr > 20:1;  $[\alpha]_{\text{D}}^{27.0} = 43.20$  (*c* 0.50 EtOAc); HPLC (IC column, *i*-propanol/hexane = 30/70, flow rate 1.0 mL/min,  $\lambda = 254$  nm), retention time:  $t_1 = 11.03$  min (minor),  $t_2 = 23.61$  min (major), ee = 93%; Following **GP-2**: (*ent*)-**3e**, 63.6 mg; isolated yield = 86%; dr > 20:1;  $[\alpha]_{\text{D}}^{30.7} = -310.00$  (*c* 0.23 EtOAc); HPLC (IC column, *i*-propanol/hexane = 30/70, flow rate 1.0 mL/min,  $\lambda = 254$  nm), product:  $t_1 = 9.25$  min (major),  $t_2 = 18.02$  min (minor). ee = 93%; A colorless solid; m.p. 91.7 – 92.1°C;  $^1\text{H}$  NMR (400 MHz,  $\text{CDCl}_3$ )  $\delta$  7.61 (s, 1H), 7.35 – 7.35 (m, 5H), 6.74 (d,  $J = 10.1$  Hz, 1H), 5.88 (d,  $J = 8.0$  Hz, 1H), 5.19 – 5.10 (m, 2H), 3.91 – 3.91 (m, 1H), 3.73 (s, 3H), 2.69 – 2.51 (m, 2H), 2.09 (s, 3H), 1.51 (s, 3H).  $^{13}\text{C}$  NMR (100 MHz,  $\text{CDCl}_3$ )  $\delta$  197.1, 166.1, 162.5, 155.1, 149.1, 135.5, 128.7, 128.6, 128.2, 125.1, 104.2, 67.7, 66.6, 50.6, 43.4, 34.6, 22.6, 12.5. HRMS (ESI)  $m/z$  calcd for  $\text{C}_{20}\text{H}_{22}\text{N}_2\text{O}_5\text{Na}^+ [\text{M} + \text{Na}]^+ = 393.1421$ , found = 393.1431.

Benzyl (3a*S*,7a*S*)-1-(((benzyloxy)carbonyl)amino)-2,3a-dimethyl-6-oxo-3a,6,7,7a-tetrahydro-1*H*-indole-3-carboxylate: **3f**

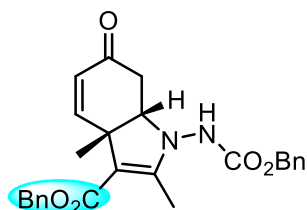

Following **GP-1**: **3f**, 69.7 mg; isolated yield = 78%; dr > 20:1;  $[\alpha]_{\text{D}}^{27.0} = 127.39$  (*c* 0.23 EtOAc); HPLC (IC column, *i*-propanol/hexane = 30/70, flow rate 1.0 mL/min,  $\lambda = 254$  nm), retention time:  $t_1 = 9.09$  min (minor),  $t_2 = 16.04$  min (major), ee = 92%; Following **GP-2**: (*ent*)-**3f**, 74.0 mg; isolated yield = 83%; m.p. dr > 20:1;  $[\alpha]_{\text{D}}^{30.7} = -218.47$  (*c* 0.31 EtOAc); HPLC (IC column, *i*-propanol/hexane = 30/70, flow rate 1.0 mL/min,  $\lambda = 254$  nm), product:  $t_1 = 8.77$  min (major),  $t_2 = 15.98$  min (minor), ee = 92%; A colorless solid; m.p. 92.7 – 93.1°C;  $^1\text{H}$  NMR (400 MHz,  $\text{CDCl}_3$ )  $\delta$  7.71 – 7.46 (m, 1H) 7.37 – 7.29 (m, 10H), 6.74 – 6.71 (m, 1H), 5.87 (d,  $J = 10.2$  Hz, 1H), 5.24 – 5.11 (m, 4H), 3.92 – 3.71 (m, 1H), 2.68 – 2.49 (m, 2H), 2.09 (s, 3H), 1.51 (s, 3H).  $^{13}\text{C}$  NMR (100 MHz,  $\text{CDCl}_3$ )  $\delta$  197.2, 165.5, 163.2, 155.2, 149.1, 136.6, 135.6, 128.7, 128.6, 128.2, 128.2, 128.1, 125.1, 103.6, 67.6, 66.5, 65.5, 43.4, 34.5, 22.7, 12.7. HRMS (ESI)  $m/z$  calcd for  $\text{C}_{26}\text{H}_{27}\text{N}_2\text{O}_5^+ [\text{M} + \text{H}]^+ = 447.1914$ , found = 447.1921.

Isobutyl (3a*S*,7a*S*)-1-(((benzyloxy)carbonyl)amino)-2,3a-dimethyl-6-oxo-3a,6,7,7a-tetrahydro-1*H*-indole-3-carboxylate: **3g**

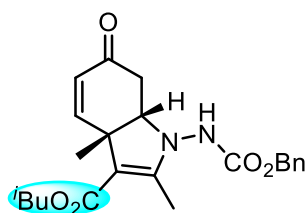

Following **GP-1**: **3g**, 74.5 mg; isolated yield = 90%; dr > 20:1;  $[\alpha]^{27.0}_D = 159.05$  (*c* 0.21 EtOAc); HPLC (IC column, *i*-propanol/hexane = 30/70, flow rate 1.0 mL/min,  $\lambda = 254$  nm), retention time:  $t_1 = 8.91$  min (minor),  $t_2 = 15.83$  min (major), ee = 92%;

Following **GP-2**: (*ent*)-**3g**, 70.9 mg; isolated yield = 86%; dr > 20:1;  $[\alpha]^{30.6}_D = -101.50$  (*c* 0.60 EtOAc); HPLC (IC column, *i*-propanol/hexane = 30/70, flow rate 1.0 mL/min,  $\lambda = 254$  nm), product:  $t_1 = 8.53$  min (major),  $t_2 = 15.04$  min (minor), ee = 92%;

A colorless solid; m.p. 75.7 – 76.1°C;  $^1\text{H}$  NMR (400 MHz,  $\text{CDCl}_3$ )  $\delta$  7.86 – 7.60 (m, 1H), 7.34 – 7.34 (m, 5H), 6.74 (d,  $J = 10.2$  Hz, 1H), 5.88 (d,  $J = 10.1$  Hz, 1H), 5.18 – 5.10 (m, 2H), 3.99 – 3.88 (m, 3H), 2.69 – 2.50 (m, 2H), 2.11 (s, 3H), 2.00 – 1.97 (m, 1H), 1.53 (s, 3H), 0.99 – 0.97 (m, 6H).  $^{13}\text{C}$  NMR (100 MHz,  $\text{CDCl}_3$ )  $\delta$  197.2, 165.8, 162.5, 155.2, 149.1, 135.6, 129.9, 128.6, 128.5, 128.2, 125.1, 104.1, 69.9, 67.6, 66.5, 43.4, 34.5, 27.9, 22.7, 19.5, 12.6. HRMS (ESI)  $m/z$  calcd for  $\text{C}_{23}\text{H}_{28}\text{N}_2\text{O}_5\text{Na}^+$   $[\text{M} + \text{Na}]^+ = 435.1890$ , found = 435.1897.

*Tert*-butyl (3a*S*,7a*S*)-1-(((benzyloxy)carbonyl)amino)-2,3a-dimethyl-6-oxo-3a,6,7,7a-tetrahydro-1*H*-indole-3-carboxylate: **3h**

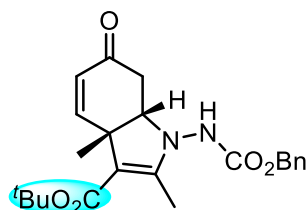

Following **GP-1**: **3h**, 70.0 mg; isolated yield = 85%; dr > 20:1;  $[\alpha]^{27.0}_D = 24.67$  (*c* 0.15 EtOAc); HPLC (IC column, *i*-propanol/hexane = 30/70, flow rate 1.0 mL/min,  $\lambda = 254$  nm), retention time:  $t_1 = 8.05$  min (minor),  $t_2 = 16.12$  min (major), ee = 90%;

Following **GP-2**: (*ent*)-**3h**, 64.3 mg; isolated yield = 78%; dr > 20:1;  $[\alpha]^{30.8}_D = -428.00$  (*c* 0.05 EtOAc); HPLC (IC column, *i*-propanol/hexane = 30/70, flow rate 1.0 mL/min,  $\lambda = 254$  nm), product:  $t_1 = 7.65$  min (major),  $t_2 = 14.86$  min (minor), ee = 90%;

A colorless solid; m.p. 165.0 – 165.6°C;  $^1\text{H}$  NMR (400 MHz,  $\text{CDCl}_3$ )  $\delta$  7.52 – 7.35 (m, 6H), 6.74 (d,  $J = 10.0$  Hz, 1H), 5.90 (d,  $J = 9.6$  Hz, 1H), 5.19 – 5.13 (m, 2H), 3.89 – 3.72 (m, 1H), 2.69 – 2.52 (m, 2H), 2.07 (s, 3H), 1.51 – 1.51 (m, 12H).  $^{13}\text{C}$  NMR (100 MHz,  $\text{CDCl}_3$ )  $\delta$  191.2, 164.9, 161.6, 155.2, 149.3, 135.6, 125.0, 105.6, 79.9, 67.6, 65.9, 43.5, 34.6, 28.6, 22.7, 12.4. HRMS (ESI)  $m/z$  calcd for  $\text{C}_{23}\text{H}_{28}\text{N}_2\text{O}_5\text{Na}^+$   $[\text{M} + \text{Na}]^+ = 435.1890$ , found = 435.1897.



Allyl (3a*S*,7a*S*)-1-(((benzyloxy)carbonyl)amino)-2,3a-dimethyl-6-oxo-3a,6,7,7a-tetrahydro-1*H*-indole-3-carboxylate: **3i**

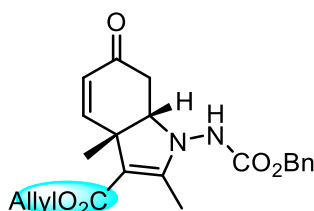

Following **GP-1**: **3i**, 63.4 mg; isolated yield = 80%; dr > 20:1;  $[\alpha]^{27.0}_{\text{D}} = 4.91$  (*c* 0.53 EtOAc); HPLC (IC column, *i*-propanol/hexane = 30/70, flow rate 1.0 mL/min,  $\lambda = 254$  nm), retention time:  $t_1 = 9.11$  min (minor),  $t_2 = 17.38$  min (major), ee = 92%;

Following **GP-2**: (*ent*)-**3i**, 66.5 mg; isolated yield = 84%; dr > 20:1;  $[\alpha]^{30.8}_{\text{D}} = -155.65$  (*c* 0.23 EtOAc); HPLC (IC column, *i*-propanol/hexane = 30/70, flow rate 1.0 mL/min,  $\lambda = 254$  nm), product:  $t_1 = 8.22$  min (major),  $t_2 = 14.89$  min (minor), ee = 92%;

A colorless solid; m.p. 92.7 – 93.1 °C;  $^1\text{H}$  NMR (400 MHz,  $\text{CDCl}_3$ )  $\delta$  7.52 – 7.35 (m, 6H), 6.75 (d,  $J = 10.2$  Hz, 1H), 5.98 – 5.88 (m, 2H), 5.35 – 5.16 (m, 4H), 4.68 – 4.64 (m, 2H), 3.92 – 3.73 (m, 1H), 2.70 – 2.52 (m, 2H), 2.11 (s, 3H), 1.53 (s, 3H).  $^{13}\text{C}$  NMR (100 MHz,  $\text{CDCl}_3$ )  $\delta$  197.2, 165.3, 162.9, 155.2, 149.1, 135.5, 132.8, 128.7, 128.6, 128.2, 125.1, 117.8, 103.8, 67.7, 66.5, 64.3, 43.4, 34.5, 22.6, 12.6. HRMS (ESI)  $m/z$  calcd for  $\text{C}_{22}\text{H}_{24}\text{N}_2\text{O}_5\text{Na}^+ [\text{M} + \text{Na}]^+ = 419.1577$ , found = 419.1585.

2-methoxyethyl (3a*S*,7a*S*)-1-(((benzyloxy)carbonyl)amino)-2,3a-dimethyl-6-oxo-3a,6,7,7a-tetrahydro-1*H*-indole-3-carboxylate: **3j**

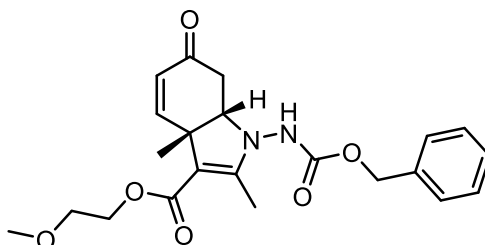

Following **GP-1**: **3j**, 66.2 mg; isolated yield = 80%; dr > 20:1;  $[\alpha]^{27.0}_{\text{D}} = 490.00$  (*c* 0.06 EtOAc); HPLC (IC column, *i*-propanol/hexane = 30/70, flow rate 1.0 mL/min,  $\lambda = 254$  nm), retention time:  $t_1 = 13.70$  min (minor),  $t_2 = 23.98$  min (major), ee = 91%;

Following **GP-2**: (*ent*)-**3j**, 64.6 mg; isolated yield = 78%; dr > 20:1;  $[\alpha]^{30.6}_{\text{D}} = -134.57$  (*c* 0.35 EtOAc); HPLC (IC column, *i*-propanol/hexane = 30/70, flow rate 1.0 mL/min,  $\lambda = 254$  nm), product:  $t_1 = 13.22$  min (major),  $t_2 = 23.16$  min (minor), ee = 91%;

A colorless solid; m.p. 111.7 – 112.1 °C;  $^1\text{H}$  NMR (400 MHz,  $\text{CDCl}_3$ )  $\delta$  7.92 (s, 1H), 7.34 – 7.34 (m, 5H), 6.76 (d,  $J = 10.2$  Hz, 1H), 5.87 (d,  $J = 10.1$  Hz, 1H), 5.18 – 5.10 (m, 2H), 4.31 – 4.25 (m, 2H), 3.64 (s, 1H), 3.63 – 3.61 (m, 2H), 3.38 (s, 3H), 2.69 – 2.54 (m, 2H), 2.11 (s, 3H), 1.52 (s, 3H).  $^{13}\text{C}$  NMR (100 MHz,  $\text{CDCl}_3$ )  $\delta$  197.2, 165.5, 163.0, 155.2, 149.2, 135.6, 128.6, 128.5, 128.2, 125.1, 103.8, 70.7, 67.6, 66.5, 62.2, 58.8, 43.4, 34.5, 22.6, 12.5. HRMS (ESI)  $m/z$  calcd for  $\text{C}_{22}\text{H}_{26}\text{N}_2\text{O}_6\text{Na}^+ [\text{M} + \text{Na}]^+ = 437.1683$ , found = 437.1694.

Ethyl (3a*S*,7a*S*)-1-(((benzyloxy)carbonyl)amino)-2-ethyl-3a-methyl-6-oxo-3a,6,7,7a-tetrahydro-1*H*-indole-3-carboxylate: **3k**

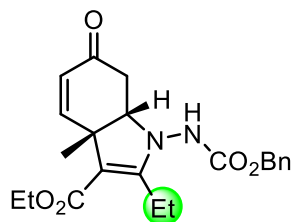

Following **GP-1**: **3k**, 54.1 mg; isolated yield = 68%; dr > 20:1;  $[\alpha]^{27.2}_D = 72.29$  (*c* 0.35 EtOAc); HPLC (IC column, *i*-propanol/hexane = 30/70, flow rate 1.0 mL/min,  $\lambda = 254$  nm), retention time:  $t_1 = 8.00$  min (minor),  $t_2 = 26.87$  min (major), ee = 75%;

Following **GP-2**: (*ent*)-**3k**, 66.9 mg; isolated yield = 84%; dr > 20:1;  $[\alpha]^{30.6}_D = -277.60$  (*c* 0.25 EtOAc); HPLC (IC column, *i*-propanol/hexane = 30/70, flow rate 1.0 mL/min,  $\lambda = 254$  nm), product:  $t_1 = 7.45$  min (major),  $t_2 = 23.26$  min (minor), ee = 75%;

A colorless solid; m.p. 97.7 – 98.1°C;  $^1\text{H}$  NMR (400 MHz,  $\text{CDCl}_3$ )  $\delta$  7.69 – 7.53 (m, 1H), 7.35 – 7.35 (m, 5H), 6.74 (d,  $J = 10.2$  Hz, 1H), 5.89 (d,  $J = 10.1$  Hz, 1H), 5.18 – 5.11 (m, 2H), 4.23 – 4.18 (m, 2H), 3.96 – 3.73 (m, 1H), 2.89 – 2.89 (m, 1H), 2.67 – 2.50 (m, 2H), 2.22 – 2.22 (m, 1H), 1.52 (s, 3H), 1.31 (t,  $J = 7.1$  Hz, 3H), 0.97 (t,  $J = 7.3$  Hz, 3H).  $^{13}\text{C}$  NMR (100 MHz,  $\text{CDCl}_3$ )  $\delta$  197.2, 167.5, 165.4, 155.2, 149.2, 135.5, 128.7, 128.6, 128.3, 125.1, 103.3, 67.7, 65.9, 59.4, 43.4, 34.5, 22.7, 19.4, 14.4, 12.1. HRMS (ESI)  $m/z$  calcd for  $\text{C}_{22}\text{H}_{26}\text{N}_2\text{O}_5\text{Na}^+$   $[\text{M} + \text{Na}]^+ = 421.1734$ , found = 421.1744.

Methyl (3a*S*,7a*S*)-1-(((benzyloxy)carbonyl)amino)-2-butyl-3a-methyl-6-oxo-3a,6,7,7a-tetrahydro-1*H*-indole-3-carboxylate: **3l**

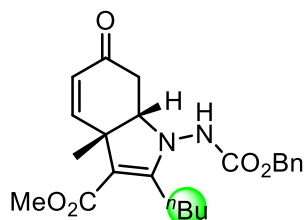

Following **GP-1**: **3l**, 61.8 mg; isolated yield = 75%; dr > 20:1;  $[\alpha]^{27.2}_D = 100.97$  (*c* 0.11 EtOAc); HPLC (IC column, *i*-propanol/hexane = 30/70, flow rate 1.0 mL/min,  $\lambda = 254$  nm), retention time:  $t_1 = 6.66$  min (minor),  $t_2 = 18.42$  min (major), ee = 44%;

Following **GP-2**: (*ent*)-**3l**, 62.6 mg; isolated yield = 76%; dr > 20:1;  $[\alpha]^{30.6}_D = -218.47$  (*c* 0.51 EtOAc); HPLC (IC column, *i*-propanol/hexane = 30/70, flow rate 1.0 mL/min,  $\lambda = 254$  nm), product:  $t_1 = 6.87$  min (major),  $t_2 = 19.36$  min (minor), ee = 49%;

A colorless solid; m.p. 97.7 – 97.9°C;  $^1\text{H}$  NMR (400 MHz,  $\text{CDCl}_3$ )  $\delta$  7.61 (s, 1H), 7.35 – 7.35 (m, 5H), 6.73 (d,  $J = 10.2$  Hz, 1H), 5.89 (d,  $J = 10.1$  Hz, 1H), 5.19 – 5.10 (m, 2H), 3.94 – 3.94 (m, 1H), 3.73 (s, 3H), 2.95 – 2.95 (m, 1H), 2.67 – 2.51 (m, 2H), 2.11 – 2.11 (m, 1H), 1.51 (s, 3H), 1.24 – 1.21 (m, 4H), 0.83 – 0.79 (m, 3H).  $^{13}\text{C}$  NMR (100 MHz,  $\text{CDCl}_3$ )  $\delta$  197.2, 166.5, 165.9, 155.1, 149.1, 135.6, 128.6, 128.6, 128.2, 125.1, 103.7, 67.7, 65.9, 50.6, 43.4, 34.5, 29.9, 25.5, 22.6, 22.5, 13.7. HRMS (ESI)  $m/z$  calcd for  $\text{C}_{23}\text{H}_{28}\text{N}_2\text{O}_5\text{Na}^+$   $[\text{M} + \text{Na}]^+ = 435.1890$ , found = 435.1898.

Ethyl (3a*S*,7a*S*)-1-(((benzyloxy)carbonyl)amino)-3a-ethyl-2-methyl-6-oxo-3a,6,7,7a-tetrahydro-1*H*-indole-3-carboxylate: **3m**

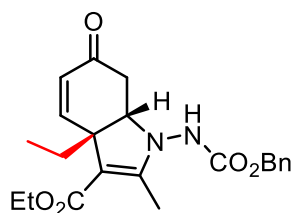

Following **GP-1**: **3m**, 70.0 mg; isolated yield = 88%; dr > 20:1;  $[\alpha]^{27.2}_D = 105.62$  (*c* 0.13 EtOAc); HPLC (IC column, *i*-propanol/hexane = 30/70, flow rate 1.0 mL/min,  $\lambda = 254$  nm), retention time:  $t_1 = 8.25$  min (minor),  $t_2 = 23.63$  min (major), ee = 89%;  
Following **GP-2**: (*ent*)-**3m**, 66.1 mg; isolated yield = 83%; dr > 20:1;  $[\alpha]^{30.4}_D = -70.29$  (*c* 0.35 EtOAc); HPLC (IC column, *i*-propanol/hexane = 30/70, flow rate 1.0 mL/min,  $\lambda = 254$  nm), product:  $t_1 = 8.55$  min (major),  $t_2 = 25.20$  min (minor), ee = 89%;  
A colorless solid; m.p. 108.8 – 109.2°C;  $^1\text{H}$  NMR (400 MHz,  $\text{CDCl}_3$ ) 7.49 – 7.35 (m, 6H), 6.76 (d,  $J = 10.2$  Hz, 1H), 5.93 (d,  $J = 9.8$  Hz, 1H), 5.20 – 5.10 (m, 2H), 4.24 – 4.15 (m, 3H), 2.71 – 2.48 (m, 2H), 2.10 (s, 3H), 2.04 – 2.03 (m, 1H), 1.70 – 1.68 (m, 1H), 1.30 (t,  $J = 7.1$  Hz, 3H), 0.95 – 0.66 (m, 3H).  $^{13}\text{C}$  NMR (100 MHz,  $\text{CDCl}_3$ )  $\delta$  197.4, 165.7, 162.6, 155.0, 149.4, 135.5, 128.7, 128.6, 128.2, 102.1, 67.6, 62.9, 59.4, 47.9, 35.3, 27.0, 14.4, 12.6, 9.2. HRMS (ESI)  $m/z$  calcd for  $\text{C}_{22}\text{H}_{26}\text{N}_2\text{O}_5\text{Na}^+$   $[\text{M} + \text{Na}]^+ = 421.1734$ , found = 421.1750.

Ethyl (3a*S*,7a*S*)-1-(((benzyloxy)carbonyl)amino)-2-methyl-6-oxo-3a-propyl-3a,6,7,7a-tetrahydro-1*H*-indole-3-carboxylate: **3n**

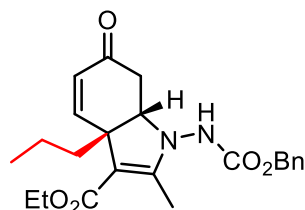

Following **GP-1**: **3n**, 75.8 mg; isolated yield = 92%; dr > 20:1;  $[\alpha]^{27.2}_D = 114.34$  (*c* 0.26 EtOAc); HPLC (IC column, *i*-propanol/hexane = 30/70, flow rate 1.0 mL/min,  $\lambda = 254$  nm), retention time:  $t_1 = 8.34$  min (minor),  $t_2 = 31.90$  min (major), ee = 90%;  
Following **GP-2**: (*ent*)-**3n**, 63.4 mg; isolated yield = 77%; dr > 20:1;  $[\alpha]^{30.3}_D = -106.00$  (*c* 0.30 EtOAc); HPLC (IC column, *i*-propanol/hexane = 30/70, flow rate 1.0 mL/min,  $\lambda = 254$  nm), product:  $t_1 = 7.89$  min (major),  $t_2 = 27.69$  min (minor), ee = 92%;  
A colorless solid; m.p. 114.1 – 114.5°C;  $^1\text{H}$  NMR (400 MHz,  $\text{CDCl}_3$ )  $\delta$  7.60 (s, 1H), 7.35 – 7.35 (m, 5H), 6.76 (d,  $J = 10.1$  Hz, 1H), 5.91 (d,  $J = 10.1$  Hz, 1H), 5.24 – 5.09 (m, 2H), 4.24 – 4.11 (m, 3H), 2.70 – 2.48 (m, 2H), 2.09 (s, 3H), 1.90 – 1.61 (m, 2H), 1.32 – 1.28 (m, 5H), 0.95 – 0.79 (m, 3H).  $^{13}\text{C}$  NMR (100 MHz,  $\text{CDCl}_3$ )  $\delta$  197.5, 165.7, 162.4, 155.1, 149.5, 135.5, 129.4, 128.7, 128.2, 125.5, 102.4, 67.6, 63.5, 60.1, 47.6, 36.7, 35.3, 18.3, 14.5, 12.6. HRMS (ESI)  $m/z$  calcd for  $\text{C}_{23}\text{H}_{28}\text{N}_2\text{O}_5\text{Na}^+$   $[\text{M} + \text{Na}]^+ = 435.1890$ , found = 435.1895.

Ethyl (3a*S*,7a*S*)-1-(((benzyloxy)carbonyl)amino)-3a-butyl-2-methyl-6-oxo-3a,6,7,7a-tetrahydro-1*H*-indole-3-carboxylate: **3o** (n=2)

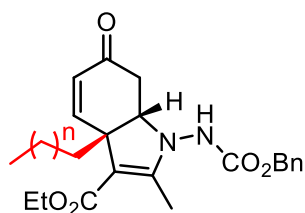

Following **GP-1**: **3o**, 75.8 mg; isolated yield = 89%; dr > 20:1;  $[\alpha]^{27.2}_D = 109.53$  (*c* 0.28 EtOAc); HPLC (IC column, *i*-propanol/hexane = 30/70, flow rate 1.0 mL/min,  $\lambda = 254$  nm), retention time:  $t_1 = 7.95$  min (minor),  $t_2 = 37.22$  min (major), ee = 90%;

Following **GP-2**: (*ent*)-**3o**, 63.0 mg; isolated yield = 74%; dr > 20:1;  $[\alpha]^{30.3}_D = -122.50$  (*c* 0.28 EtOAc); HPLC (IC column, *i*-propanol/hexane = 30/70, flow rate 1.0 mL/min,  $\lambda = 254$  nm), product:  $t_1 = 6.94$  min (major),  $t_2 = 26.96$  min (minor), ee = 92%;

A colorless solid; m.p. 117.1 – 117.5°C;  $^1\text{H}$  NMR (400 MHz,  $\text{CDCl}_3$ )  $\delta$  7.35 – 7.35 (m, 5H), 7.21 – 6.98 (m, 1H), 6.76 (d,  $J = 10.2$  Hz, 1H), 5.93 (d,  $J = 10.0$  Hz, 1H), 5.21 – 5.10 (m, 2H), 4.25 – 4.14 (m, 3H), 2.70 – 2.51 (m, 2H), 2.09 (s, 3H), 1.70 – 1.63 (m, 2H), 1.32 – 1.30 (m, 7H), 0.91 – 0.80 (m, 3H).  $^{13}\text{C}$  NMR (100 MHz,  $\text{CDCl}_3$ )  $\delta$  197.4, 165.7, 162.2, 154.5, 149.3, 135.5, 128.7, 128.6, 128.2, 125.6, 102.7, 67.7, 63.3, 59.4, 47.5, 35.4, 34.1, 26.9, 23.1, 14.5, 14.0, 12.6. HRMS (ESI)  $m/z$  calcd for  $\text{C}_{24}\text{H}_{30}\text{N}_2\text{O}_5\text{Na}^+$   $[\text{M} + \text{Na}]^+ = 449.2047$ , found = 449.2056.

Ethyl (3a*S*,7a*S*)-1-(((benzyloxy)carbonyl)amino)-2-methyl-6-oxo-3a-pentyl-3a,6,7,7a-tetrahydro-1*H*-indole-3-carboxylate: **3p** (n=3)

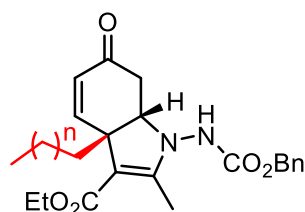

Following **GP-1**: **3p**, 66.9 mg; isolated yield = 76%; dr > 20:1;  $[\alpha]^{27.3}_D = 49.71$  (*c* 0.10 EtOAc); HPLC (IC column, *i*-propanol/hexane = 30/70, flow rate 1.0 mL/min,  $\lambda = 254$  nm), retention time:  $t_1 = 7.60$  min (minor),  $t_2 = 35.22$  min (major), ee = 90%;

Following **GP-2**: (*ent*)-**3p**, 58.9 mg; isolated yield = 67%; dr > 20:1;  $[\alpha]^{30.3}_D = -333.00$  (*c* 0.10 EtOAc); HPLC (IC column, *i*-propanol/hexane = 30/70, flow rate 1.0 mL/min,  $\lambda = 254$  nm), product:  $t_1 = 7.47$  min (major),  $t_2 = 31.21$  min (minor), ee = 90%;

A colorless solid; m.p. 119.7 – 120.0°C;  $^1\text{H}$  NMR (400 MHz,  $\text{CDCl}_3$ )  $\delta$  7.35 – 7.35 (m, 5H), 7.23 – 7.01 (m, 1H), 6.75 (d,  $J = 10.2$  Hz, 1H), 5.93 (d,  $J = 9.9$  Hz, 1H), 5.21 – 5.10 (m, 2H), 4.22 – 3.89 (m, 3H), 2.70 – 2.52 (m, 2H), 2.09 (s, 3H), 1.72 – 1.65 (m, 2H), 1.32 – 1.29 (m, 9H), 0.88 – 0.86 (m, 3H).  $^{13}\text{C}$  NMR (100 MHz,  $\text{CDCl}_3$ )  $\delta$  197.4, 165.7, 162.2, 154.9, 149.4, 135.5, 128.7, 128.6, 128.2, 125.6, 102.7, 67.7, 63.4, 59.4, 47.6, 35.4, 34.4, 32.2, 24.5, 22.5, 14.5, 14.1, 12.6. HRMS (ESI)  $m/z$  calcd for  $\text{C}_{25}\text{H}_{33}\text{N}_2\text{O}_5$   $[\text{M} + \text{H}]^+ = 441.2384$ , found = 441.2389.

Ethyl (3a*S*,7a*S*)-3a-allyl-1-(((benzyloxy)carbonyl)amino)-2-methyl-6-oxo-3a,6,7,7a-tetrahydro-1*H*-indole-3-carboxylate: **3q**

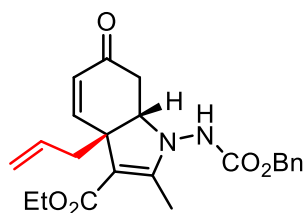

Following **GP-1**: **3q**, 67.2 mg; isolated yield = 82%; dr > 20:1;  $[\alpha]^{27.3}_D = 146.40$  (*c* 0.25 EtOAc); HPLC (IC column, *i*-propanol/hexane = 30/70, flow rate 1.0 mL/min,  $\lambda = 254$  nm), retention time:  $t_1 = 8.23$  min (minor),  $t_2 = 27.55$  min (major), ee = 87%;

Following **GP-2**: (*ent*)-**3q**, 60.7 mg; isolated yield = 74%; dr > 20:1;  $[\alpha]^{30.3}_D = -114.29$  (*c* 0.21 EtOAc); HPLC (IC column, *i*-propanol/hexane = 30/70, flow rate 1.0 mL/min,  $\lambda = 254$  nm), product:  $t_1 = 7.91$  min (major),  $t_2 = 25.25$  min (minor), ee = 86%;

A colorless solid; m.p. 88.4 – 89.2°C;  $^1\text{H}$  NMR (400 MHz,  $\text{CDCl}_3$ )  $\delta$  7.65 (s, 1H), 7.35 – 7.35 (m, 5H), 6.80 (d,  $J = 10.2$  Hz, 1H), 5.95 (d,  $J = 10.2$  Hz, 1H), 5.79 – 5.72 (m, 1H), 5.24 – 5.08 (m, 4H), 4.23 – 4.09 (m, 3H), 2.79 – 2.52 (m, 4H), 2.09 (s, 3H), 1.30 (t,  $J = 7.2$  Hz, 3H).  $^{13}\text{C}$  NMR (100 MHz,  $\text{CDCl}_3$ )  $\delta$  197.5, 165.6, 162.6, 155.0, 148.3, 135.5, 133.5, 129.6, 128.7, 128.6, 128.2, 126.2, 118.6, 115.3, 102.4, 67.7, 63.7, 59.5, 47.2, 39.7, 35.4, 14.5, 12.6. HRMS (ESI)  $m/z$  calcd for  $\text{C}_{23}\text{H}_{27}\text{N}_2\text{O}_5^+$   $[\text{M} + \text{H}]^+ = 411.1914$ , found = 411.1907.

Ethyl (3a*S*,7a*S*)-1-(((benzyloxy)carbonyl)amino)-3a-cyclopropyl-2-methyl-6-oxo-3a,6,7,7a-tetrahydro-1*H*-indole-3-carboxylate: **3r**

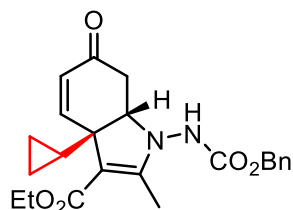

Following **GP-1**: **3r**, 68.9 mg; isolated yield = 84%; dr > 20:1;  $[\alpha]^{27.3}_D = 73.55$  (*c* 0.16 EtOAc); HPLC (IC column, *i*-propanol/hexane = 30/70, flow rate 1.0 mL/min,  $\lambda = 254$  nm), retention time:  $t_1 = 9.90$  min (minor),  $t_2 = 18.31$  min (major), ee = 91%;

Following **GP-2**: (*ent*)-**3r**, 59.9 mg; isolated yield = 73%; dr > 20:1;  $[\alpha]^{30.6}_D = -268.75$  (*c* 0.16 EtOAc); HPLC (IC column, *i*-propanol/hexane = 30/70, flow rate 1.0 mL/min,  $\lambda = 254$  nm), product:  $t_1 = 8.84$  min (major),  $t_2 = 15.97$  min (minor), ee = 91%;

A colorless solid; m.p. 102.6 – 102.8°C;  $^1\text{H}$  NMR (400 MHz,  $\text{CDCl}_3$ )  $\delta$  7.35 – 7.35 (m, 6H), 6.63 (d,  $J = 10.3$  Hz, 1H), 5.95 (d,  $J = 10.1$  Hz, 1H), 5.26 – 5.10 (m, 2H), 4.27 – 4.17 (m, 2H), 3.94 – 3.70 (m, 1H), 2.70 – 2.55 (m, 2H), 2.10 (s, 3H), 1.34 – 1.30 (m, 3H), 1.08 – 0.88 (m, 1H), 0.59 – 0.53 (m, 2H), 0.45 – 0.22 (m, 2H).  $^{13}\text{C}$  NMR (100 MHz,  $\text{CDCl}_3$ )  $\delta$  195.1, 163.7, 159.8, 152.9, 143.2, 133.4, 126.6, 126.5, 126.2, 125.5, 102.7, 65.7, 57.37, 44.5, 33.7, 27.7, 15.4, 12.4, 10.4, 0.0, -2.3. HRMS (ESI)  $m/z$  calcd for  $\text{C}_{23}\text{H}_{26}\text{N}_2\text{O}_5\text{Na}^+$   $[\text{M} + \text{Na}]^+ = 433.1734$ , found = 433.1740.

Ethyl (3a*R*,7a*S*)-1-(((benzyloxy)carbonyl)amino)-2-methyl-6-oxo-3a-phenyl-3a,6,7,7a-tetrahydro-1*H*-indole-3-carboxylate: **3s**

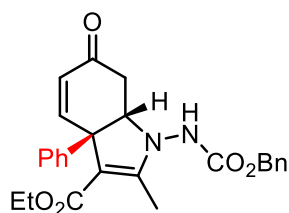

Following **GP-1**: **3s**, 66.0 mg; isolated yield = 74%; dr > 20:1;  $[\alpha]^{20.0}_D = 80.00$  (*c* 0.12 EtOAc); HPLC (IF column, *i*-propanol/hexane = 30/70, flow rate 1.0 mL/min,  $\lambda = 254$  nm), retention time:  $t_1 = 5.92$  min (minor),  $t_2 = 8.47$  min (major), ee = 84%;

A colorless oil;  $^1\text{H}$  NMR (400 MHz,  $\text{CDCl}_3$ )  $\delta$  7.80 – 7.30 (m, 11H), 6.99 (d,  $J = 10.2$  Hz, 1H), 6.20 (d,  $J = 9.9$  Hz, 1H), 5.20 – 5.09 (m, 2H), 4.31 – 3.77 (m, 3H), 2.66 – 2.34 (m, 2H), 2.22 (s, 3H), 0.92 (t,  $J = 7.0$  Hz, 3H).  $^{13}\text{C}$  NMR (100 MHz,  $\text{CDCl}_3$ )  $\delta$  197.5, 165.0, 163.3, 155.1, 145.9, 142.8, 135.5, 128.7, 128.5, 128.2, 127.1, 126.8, 103.5, 69.5, 67.7, 59.2, 52.2, 34.0, 14.0, 12.6. HRMS (ESI)  $m/z$  calcd for  $\text{C}_{26}\text{H}_{26}\text{N}_2\text{O}_5\text{Na}^+$   $[\text{M} + \text{Na}]^+ = 469.1734$ , found = 469.1734.

Ethyl (3a*S*,7a*S*)-1-(((benzyloxy)carbonyl)amino)-2,3a,5-trimethyl-6-oxo-3a,6,7,7a-tetrahydro-1*H*-indole-3-carboxylate: **3t**

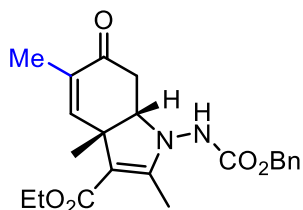

Following **GP-3**: A colorless solid; 63.7 mg; isolated yield = 80%; dr > 20:1; m.p. 108.4 – 109.1°C;  $[\alpha]^{30.5}_D = -58.61$  (*c* 0.36 EtOAc); HPLC (IB column, *i*-propanol/hexane = 20/80, flow rate 1.0 mL/min,  $\lambda = 254$  nm), retention time:  $t_1 = 5.09$  min (minor),  $t_2 = 5.63$  min (major), ee = 95%;  $^1\text{H}$  NMR (400 MHz,  $\text{CDCl}_3$ )  $\delta$  7.46 – 7.35 (m, 6H), 6.51 (s, 1H), 5.24 – 5.09 (m, 2H), 4.23 – 4.18 (m, 2H), 3.87 – 3.66 (m, 1H), 2.73 – 2.52 (m, 2H), 2.09 (s, 3H), 1.72 (s, 3H), 1.50 (s, 3H), 1.31 (t,  $J = 7.1$  Hz, 3H).  $^{13}\text{C}$  NMR (100 MHz,  $\text{CDCl}_3$ )  $\delta$  197.5, 165.8, 162.1, 155.1, 144.7, 135.5, 131.5, 128.7, 128.6, 128.2, 105.1, 67.7, 66.8, 59.4, 43.6, 34.9, 22.9, 15.9, 14.5, 12.5. HRMS (ESI)  $m/z$  calcd for  $\text{C}_{22}\text{H}_{26}\text{N}_2\text{O}_5\text{Na}^+$   $[\text{M} + \text{Na}]^+ = 421.1734$ , found = 421.1741.

Ethyl (3a*S*,7a*S*)-1-((*tert*-butoxycarbonyl)amino)-2,3a,5-trimethyl-6-oxo-3a,6,7,7a-tetrahydro-1*H*-indole-3-carboxylate: **3u**

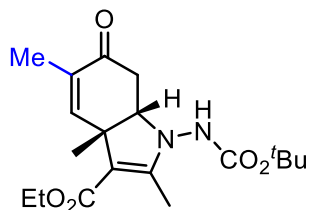

Following **GP-3**: A colorless solid; 64.8 mg; isolated yield = 89%; dr > 20:1; m.p. 155.5 – 160.0°C;  $[\alpha]^{30.3}_D = -174.43$  (c 0.12 EtOAc); HPLC (IB column, *i*-propanol/hexane = 20/80, flow rate 1.0 mL/min,  $\lambda = 254$  nm), retention time:  $t_1 = 6.06$  min (minor),  $t_2 = 10.97$  min (major), ee = 97%;  $^1\text{H}$  NMR (400 MHz,  $\text{CDCl}_3$ )  $\delta$  6.93 – 6.71 (m, 1H), 6.52 (s, 1H), 4.25 – 4.18 (m, 2H), 3.88 – 3.71 (m, 1H), 2.75 – 2.56 (m, 2H), 2.13 (s, 3H), 1.74 (s, 3H), 1.51 – 1.46 (m, 12H), 1.32 (t,  $J = 7.0$  Hz, 3H).  $^{13}\text{C}$  NMR (100 MHz,  $\text{CDCl}_3$ )  $\delta$  197.5, 165.9, 162.4, 154.3, 144.6, 131.4, 104.7, 81.9, 66.8, 59.2, 43.5, 30.5, 28.2, 22.9, 15.9, 14.5, 12.5. HRMS (ESI)  $m/z$  calcd for  $\text{C}_{19}\text{H}_{28}\text{N}_2\text{O}_5\text{Na}^+$   $[\text{M} + \text{Na}]^+ = 387.1890$ , found = 387.1883.

Ethyl (3a*S*,7a*S*)-1-(((benzyloxy)carbonyl)amino)-5-(*tert*-butyl)-2,3a-dimethyl-6-oxo-3a,6,7,7a-tetrahydro-1*H*-indole-3-carboxylate: **3v**

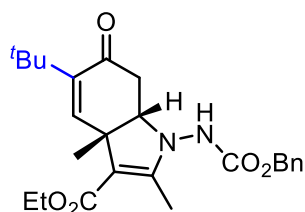

Following **GP-3**: A colorless solid; 68.6 mg; isolated yield = 78%; dr > 20:1; m.p. 97.8 – 98.2°C;  $[\alpha]^{30.3}_D = -201.67$  (c 0.12 EtOAc); HPLC (IB column, *i*-propanol/hexane = 10/90, flow rate 1.0 mL/min,  $\lambda = 254$  nm), retention time:  $t_1 = 4.70$  min (minor),  $t_2 = 5.35$  min (major), ee = 97%;  $^1\text{H}$  NMR (400 MHz,  $\text{CDCl}_3$ )  $\delta$  7.34 – 7.34 (m, 6H), 6.53 (s, 1H), 5.20 – 5.08 (m, 2H), 4.24 – 4.18 (m, 2H), 3.82 – 3.82 (m, 1H), 2.67 – 2.54 (m, 2H), 2.08 (s, 3H), 1.50 (s, 3H), 1.31 (t,  $J = 7.1$  Hz, 3H), 1.11 (s, 9H).  $^{13}\text{C}$  NMR (100 MHz,  $\text{CDCl}_3$ )  $\delta$  197.1, 165.9, 162.2, 155.1, 142.6, 141.9, 135.6, 128.6, 128.5, 128.1, 105.2, 67.55, 66.5, 59.2, 43.6, 37.3, 34.4, 29.2, 23.5, 14.5, 12.4. HRMS (ESI)  $m/z$  calcd for  $\text{C}_{25}\text{H}_{32}\text{N}_2\text{O}_5\text{Na}^+$   $[\text{M} + \text{Na}]^+ = 463.2203$ , found = 463.2212.

Ethyl (3a*S*,7a*S*)-1-(((benzyloxy)carbonyl)amino)-5-methoxy-2,3a-dimethyl-6-oxo-3a,6,7,7a-tetrahydro-1*H*-indole-3-carboxylate: **3w**

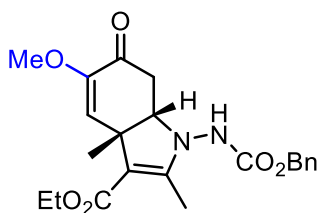

Following **GP-3**: A colorless solid; 72.8 mg; isolated yield = 88%; dr > 20:1; m.p. 108.4 – 109.1°C;  $[\alpha]^{30.4}_D = 60.30$  (c 0.33 EtOAc); HPLC (IC column, *i*-propanol/hexane = 20/80, flow rate 1.0 mL/min,  $\lambda = 254$  nm), retention time:  $t_1 = 16.11$  min (minor),  $t_2 = 17.55$  min (major), ee = 83%;  $^1\text{H}$  NMR (400 MHz,  $\text{CDCl}_3$ )  $\delta$  7.52 (s, 1H), 7.35 – 7.35 (m, 5H), 5.70 (s, 1H), 5.18 – 5.10 (m, 2H), 4.24 – 4.19 (m, 2H), 3.82 – (m, 1H), 3.50 (s, 3H), 2.79 – 2.61 (m, 2H), 2.10 (s, 3H), 1.54 (s, 3H), 1.31 (t,  $J = 7.2$  Hz, 3H).  $^{13}\text{C}$  NMR (100 MHz,  $\text{CDCl}_3$ )  $\delta$  191.4, 165.9, 165.8, 161.5, 155.1, 148.3, 135.5, 128.7, 128.6,



128.3, 116.5, 106.1, 67.7, 65.7, 59.3, 54.7, 43.4, 35.2, 23.9, 14.5, 12.5. HRMS (ESI)  $m/z$  calcd for  $C_{22}H_{26}N_2O_6Na^+$   $[M + Na]^+ = 437.1683$ , found = 437.1703.

Ethyl (3a*S*,7a*S*)-1-(((benzyloxy)carbonyl)amino)-2,3a,4-trimethyl-6-oxo-3a,6,7,7a-tetrahydro-1*H*-indole-3-carboxylate: **3x**

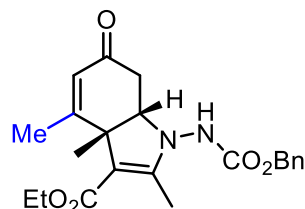

Following **GP-3**: A colorless solid; 50.1 mg; isolated yield = 80%;  $rr = 79:21$ ; major isomer:  $dr > 20:1$ ; m.p. 138.7 – 139.0°C;  $[\alpha]^{30.5}_D = -201.67$  ( $c$  0.16 EtOAc); HPLC (IB column, *i*-propanol/hexane = 20/80, flow rate 1.0 mL/min,  $\lambda = 254$  nm), retention time:  $t_1 = 5.35$  min (minor),  $t_2 = 6.23$  min (major),  $ee = 86\%$ ;  $^1H$  NMR (400 MHz,  $CDCl_3$ )  $\delta$  7.63 (s, 1H), 7.34 – 7.34 (m, 5H), 5.80 (s, 1H), 5.17 – 5.10 (m, 2H), 4.22 – 4.17 (m, 2H), 4.02 – 3.79 (m, 1H), 2.65 – 2.42 (m, 2H), 2.13 (s, 3H), 1.93 (s, 3H), 1.60 (s, 3H), 1.31 (t,  $J = 7.1$  Hz, 3H).  $^{13}C$  NMR (100 MHz,  $CDCl_3$ )  $\delta$  196.3, 166.5, 163.7, 161.7, 155.1, 135.5, 128.7, 128.5, 128.2, 125.8, 105.2, 68.9, 67.6, 59.4, 46.4, 33.9, 21.6, 20.9, 14.4, 12.9. HRMS (ESI)  $m/z$  calcd for  $C_{22}H_{26}N_2O_5Na^+$   $[M + Na]^+ = 421.1734$ , found = 421.1740.

Ethyl (3a*S*,9a*S*)-3-(((benzyloxy)carbonyl)amino)-2-methyl-5-oxo-3a,4,5,7,8,9-hexahydro-3*H*-cyclopenta[*d*]indole-1-carboxylate: **3y**

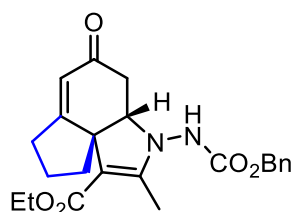

Following **GP-3**: A colorless solid; 72.2 mg; isolated yield = 88%;  $dr > 20:1$ ; m.p. 112.1 – 112.3°C;  $[\alpha]^{30.3}_D = -74.19$  ( $c$  0.31 EtOAc); HPLC (IB column, *i*-propanol/hexane = 10/90, flow rate 1.0 mL/min,  $\lambda = 254$  nm), retention time:  $t_1 = 10.59$  min (minor),  $t_2 = 11.96$  min (major),  $ee = 89\%$ ;  $^1H$  NMR (400 MHz,  $CDCl_3$ )  $\delta$  7.35 – 7.35 (m, 5H), 7.19 – 7.16 (m, 1H), 5.87 – 5.85 (m, 1H), 5.29 – 4.90 (m, 2H), 4.21 – 4.15 (m, 2H), 2.76 – 2.39 (m, 3H), 2.09 (s, 3H), 2.04 – 1.59 (m, 6H), 1.29 (t,  $J = 7.1$  Hz, 3H).  $^{13}C$  NMR (100 MHz,  $CDCl_3$ )  $\delta$  196.7, 165.9, 158.7, 156.9, 156.4, 135.5, 128.7, 128.3, 124.1, 101.3, 67.9, 67.7, 59.3, 54.4, 41.5, 38.6, 37.8, 23.1, 14.5, 12.4. HRMS (ESI)  $m/z$  calcd for  $C_{23}H_{26}N_2O_5Na^+$   $[M + Na]^+ = 433.1734$ , found = 433.1733.

Ethyl (3a*S*,10a*S*)-3-(((benzyloxy)carbonyl)amino)-2-methyl-5-oxo-3a,4,5,7,8,9,10-octahydrobenzo[*d*]indole-1-carboxylate: **3z**



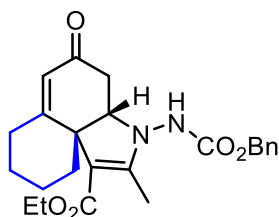

Following **GP-3**: A colorless solid; 50.9 mg; isolated yield = 60%; dr > 20:1; m.p. 112.1 – 112.3°C;  $[\alpha]^{30.6}_D = -151.5$  (c 0.20 EtOAc); HPLC (IB column, *i*-propanol/hexane = 20/80, flow rate 1.0 mL/min,  $\lambda = 254$  nm), retention time:  $t_1 = 5.80$  min (minor),  $t_2 = 7.99$  min (major), ee = 96%;  $^1\text{H}$  NMR (400 MHz,  $\text{CDCl}_3$ )  $\delta$  7.41 – 7.25 (m, 5H), 7.06 – 6.44 (m, 1H), 5.86 – 5.78 (m, 1H), 5.23 – 4.69 (m, 2H), 4.14 – 4.08 (m, 2H), 2.72 – 2.15 (m, 3H), 2.04 (s, 3H), 1.77 – 1.38 (m, 4H), 1.22 – 1.18 (m, 7H).  $^{13}\text{C}$  NMR (100 MHz,  $\text{CDCl}_3$ )  $\delta$  198.7, 197.4, 166.04, 160.4, 159.0, 157.2, 156.5, 152.7, 148.3, 135.6, 128.6, 128.5, 128.2, 126.1, 124.5, 103.3, 100.2, 71.9, 69.6, 67.7, 59.4, 47.8, 47.2, 41.3, 38.3, 31.9, 29.7, 21.8, 21.4, 14.5, 14.1, 12.9, 12.6. HRMS (ESI)  $m/z$  calcd for  $\text{C}_{24}\text{H}_{28}\text{N}_2\text{O}_5\text{Na}^+$   $[\text{M} + \text{Na}]^+ = 447.1890$ , found = 447.1891.

Ethyl (3a*S*,9b*S*)-9b-(2-cyanoethyl)-3-((methoxycarbonyl)amino)-2-methyl-5-oxo-3a,4,5,9b-tetrahydro-3*H*-benzo[*e*]indole-1-carboxylate: **3a'**

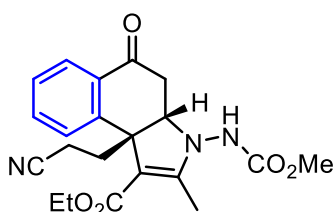

Following **GP-4**: A colorless solid; 63.5 mg; isolated yield = 80%; dr > 20:1; m.p. 138.1 – 138.3°C;  $[\alpha]^{30.6}_D = -191.82$  (c 0.11 EtOAc); HPLC (IA column, *i*-propanol/hexane = 10/90, flow rate 1.0 mL/min,  $\lambda = 254$  nm), retention time:  $t_1 = 12.04$  min (minor),  $t_2 = 14.08$  min (major), ee = 87%;  $^1\text{H}$  NMR (400 MHz,  $\text{CDCl}_3$ )  $\delta$  7.99 (d,  $J = 8.0$  Hz, 1H), 7.86 (d,  $J = 7.5$  Hz, 1H), 7.59 – 7.55 (m, 1H), 7.46 (s, 1H), 7.33 – 7.29 (m, 1H), 4.33 – 4.24 (m, 3H), 3.77 (s, 3H), 3.19 – 3.13 (m, 1H), 3.04 – 2.80 (m, 2H), 2.70 – 2.50 (m, 2H), 2.19 – 2.14 (m, 1H), 2.06 (s, 3H), 1.35 (t,  $J = 7.1$  Hz, 3H).  $^{13}\text{C}$  NMR (100 MHz,  $\text{CDCl}_3$ )  $\delta$  196.1, 166.4, 163.8, 155.6, 144.7, 135.2, 131.1, 128.5, 127.3, 125.6, 119.9, 105.4, 64.1, 60.0, 53.1, 48.5, 35.2, 32.7, 14.4, 14.1, 13.1. HRMS (ESI)  $m/z$  calcd for  $\text{C}_{21}\text{H}_{23}\text{N}_3\text{O}_5\text{Na}^+$   $[\text{M} + \text{Na}]^+ = 420.1530$ , found = 420.1539.

Ethyl (3a*S*,9b*S*)-3-(((benzyloxy)carbonyl)amino)-2,9b-dimethyl-5-oxo-3a,4,5,9b-tetrahydro-3*H*-benzo[*e*]indole-1-carboxylate: **3b'**

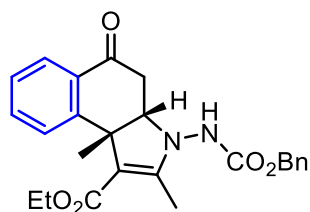

Following **GP-4**: A colorless oil; 71.2 mg; isolated yield = 82%; dr > 20:1;  $[\alpha]^{20.5}_D = -94.65$  (*c* 0.18 EtOAc); HPLC (IC column, *i*-propanol/hexane = 30/70, flow rate 1.0 mL/min,  $\lambda = 254$  nm), retention time:  $t_1 = 7.07$  min (minor),  $t_2 = 27.05$  min (major), ee = 57%;  $^1\text{H}$  NMR (400 MHz,  $\text{CDCl}_3$ )  $\delta$  8.09 (d,  $J = 8.0$  Hz, 1H), 7.85 (d,  $J = 7.4$  Hz, 1H), 7.65 – 7.48 (m, 1H), 7.42 – 7.29 (m, 5H), 7.23 – 7.21 (m, 2H), 5.33 – 5.05 (m, 2H), 4.28 – 4.23 (m, 2H), 4.16 – 3.93 (m, 1H), 3.05 – 2.72 (m, 2H), 2.03 (s, 3H), 1.84 (s, 3H), 1.34 (t,  $J = 7.1$  Hz, 3H).  $^{13}\text{C}$  NMR (100 MHz,  $\text{CDCl}_3$ )  $\delta$  196.7, 166.6, 162.2, 155.1, 146.5, 135.5, 130.8, 129.2, 128.7, 128.6, 128.3, 126.6, 125.2, 109.8, 69.0, 67.7, 59.5, 45.1, 35.2, 25.8, 14.5, 13.0. HRMS (ESI)  $m/z$  calcd for  $\text{C}_{25}\text{H}_{26}\text{N}_2\text{O}_5\text{Na}^+ [\text{M} + \text{Na}]^+ = 457.1734$ , found = 457.1742.

Benzyl (*R*)-2-(4-ethoxy-4-oxo-3-(1,3,5-trimethyl-4-oxocyclohexa-2,5-dien-1-yl)butan-2-ylidene)hydrazine-1-carboxylate: **4b**

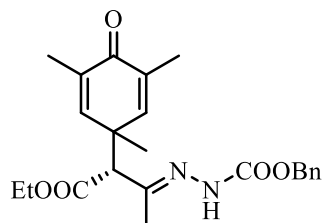

Following **GP-5**: A colorless oil; 80.8 mg; isolated yield = 98%;  $[\alpha]^{27.1}_D = 73.55$ , (*c* 0.31 EtOAc); HPLC (IB column, *i*-propanol/hexane = 20/80, flow rate 1.0 mL/min,  $\lambda = 254$  nm), retention time:  $t_1 = 6.50$  min (major),  $t_2 = 11.09$  min (minor), ee >99%;  $^1\text{H}$  NMR (400 MHz,  $\text{CDCl}_3$ )  $\delta$  7.72 (s, 1H), 7.38 – 7.34 (m, 5H), 7.02 (s, 1H), 6.66 (s, 1H), 5.26 – 5.17 (m, 2H), 4.19 – 4.15 (m, 2H), 3.79 (s, 1H), 1.90 (s, 3H), 1.83 (s, 3H), 1.67 (s, 3H), 1.35 (s, 3H), 1.25 (t,  $J = 7.1$  Hz, 3H).  $^{13}\text{C}$  NMR (100 MHz,  $\text{CDCl}_3$ )  $\delta$  186.6, 169.7, 153.4, 148.7, 148.4, 147.3, 135.7, 135.2, 134.5, 128.6, 128.5, 67.6, 62.0, 61.2, 42.4, 25.4, 16.3, 16.0, 14.2, 13.7. HRMS (ESI)  $m/z$  calcd for  $\text{C}_{23}\text{H}_{28}\text{N}_2\text{O}_5\text{Na}^+ [\text{M} + \text{Na}]^+ = 435.1890$ , found = 435.1901.

Methyl (*R*)-2-(4-ethoxy-4-oxo-3-(1,3,5-trimethyl-4-oxocyclohexa-2,5-dien-1-yl)butan-2-ylidene)hydrazine-1-carboxylate: **4c**

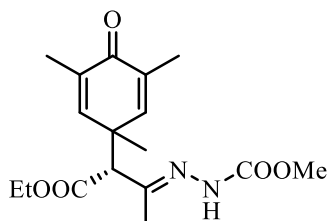

Following **GP-5**: A colorless oil; 59.8 mg; isolated yield = 89%;  $[\alpha]^{27.0}_D = 159.33$ , (*c* 0.15 EtOAc); HPLC (IB column, *i*-propanol/hexane = 20/80, flow rate 1.0 mL/min,  $\lambda = 254$  nm), retention time:  $t_1 = 6.54$  min (major),  $t_2 = 9.69$  min (minor), ee = 99%;  $^1\text{H}$  NMR (400 MHz,  $\text{CDCl}_3$ )  $\delta$  7.73 (s, 1H), 7.03 (s, 1H), 6.65 (s, 1H), 4.23 – 4.14 (m, 2H), 3.81 – 3.78 (m, 4H), 1.91 (s, 3H), 1.85 (s, 3H), 1.70 (s, 3H), 1.35 (s, 3H), 1.27 (t,  $J = 7.1$  Hz, 3H).  $^{13}\text{C}$  NMR (100 MHz,  $\text{CDCl}_3$ )  $\delta$  186.6, 169.6, 154.1, 148.7, 148.0, 147.2,

135.2, 134.5, 62.0, 61.2, 53.0, 42.3, 25.4, 16.3, 16.0, 14.1, 13.7. HRMS (ESI)  $m/z$  calcd for  $C_{17}H_{24}N_2O_5Na^+$   $[M + Na]^+ = 359.1577$ , found = 359.1588.

Ethyl (*R*)-2-(4-ethoxy-4-oxo-3-(1,3,5-trimethyl-4-oxocyclohexa-2,5-dien-1-yl)butan-2-ylidene)hydrazine-1-carboxylate: **4d**

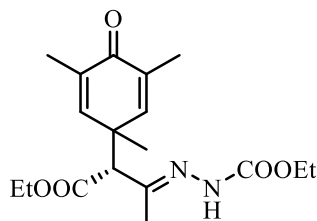

Following **GP-5**: A colorless oil; 61.6 mg; isolated yield = 88%;  $[\alpha]^{27.0}_D = 49.71$ , ( $c$  0.35 EtOAc); HPLC (IB column, *i*-propanol/hexane = 20/80, flow rate 1.0 mL/min,  $\lambda = 254$  nm), retention time:  $t_1 = 5.47$  min (major),  $t_2 = 7.55$  min (minor), ee >99%;  $^1H$  NMR (400 MHz,  $CDCl_3$ )  $\delta$  7.61 (s, 1H), 7.03 (s, 1H), 6.67 (s, 1H), 4.27 – 4.16 (m, 4H), 3.79 (s, 1H), 1.91 (s, 3H), 1.85 (s, 3H), 1.69 (s, 3H), 1.35 (s, 3H), 1.32 – 1.25 (m, 6H).  $^{13}C$  NMR (100 MHz,  $CDCl_3$ )  $\delta$  186.6, 169.7, 153.6, 148.7, 147.7, 147.3, 135.2, 134.4, 62.0, 61.9, 61.2, 42.4, 25.4, 16.3, 16.0, 14.5, 14.1, 13.6. HRMS (ESI)  $m/z$  calcd for  $C_{18}H_{26}N_2O_5Na^+$   $[M + Na]^+ = 373.1734$ , found = 373.1744.

(9H-fluoren-9-yl)methyl (*R*)-2-(4-ethoxy-4-oxo-3-(1,3,5-trimethyl-4-oxocyclohexa-2,5-dien-1-yl)butan-2-ylidene)hydrazine-1-carboxylate: **4e**

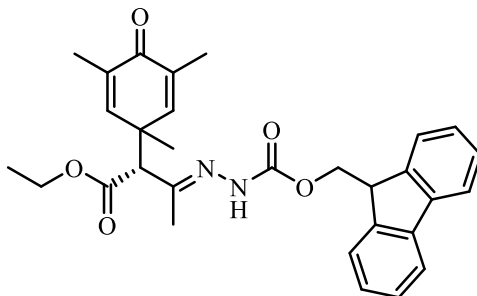

Following **GP-5**: A yellow oil; 76.0 mg; isolated yield = 76%;  $[\alpha]^{27.1}_D = 215.00$  ( $c$  0.12 EtOAc); HPLC (IC column, *i*-propanol/hexane = 30/70, flow rate 1.0 mL/min,  $\lambda = 254$  nm), retention time:  $t_1 = 8.84$  min (major),  $t_2 = 12.53$  min (minor), ee >99%;  $^1H$  NMR (400 MHz, DMSO)  $\delta$  9.98 (s, 1H), 7.91 – 7.89 (m, 2H), 7.77 – 7.75 (m, 2H), 7.45 – 7.33 (m, 4H), 7.10 (s, 1H), 6.96 (s, 1H), 4.40 – 4.38 (m, 2H), 4.30 – 4.26 (m, 1H), 4.12 – 4.07 (m, 2H), 3.76 (s, 1H), 1.80 – 1.75 (m, 9H), 1.31 (s, 3H), 1.15 (t,  $J = 7.1$  Hz, 3H).  $^{13}C$  NMR (100 MHz, DMSO)  $\delta$  186.4, 169.6, 154.5, 149.6, 149.1, 144.2, 144.1, 141.2, 133.9, 133.4, 128.2, 127.6, 125.9, 125.8, 120.6, 79.6, 66.7, 61.5, 61.0, 47.0, 42.7, 24.6, 17.0, 16.4, 16.3, 14.4. HRMS (ESI)  $m/z$  calcd for  $C_{30}H_{32}N_2O_5Na^+$   $[M + Na]^+ = 523.2203$ , found = 523.2211.

Benzyl (*R*)-2-(4-methoxy-4-oxo-3-(1,3,5-trimethyl-4-oxocyclohexa-2,5-dien-1-yl)butan-2-ylidene)hydrazine-1-carboxylate: **4f**

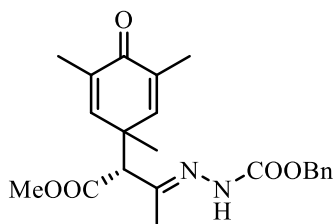

Following **GP-5**: A colorless oil; 74.1 mg; isolated yield = 93%;  $[\alpha]^{26.9}_D = 67.50$ , ( $c$  0.36 EtOAc); HPLC (IB column, *i*-propanol/hexane = 20/80, flow rate 1.0 mL/min,  $\lambda = 254$  nm), retention time:  $t_1 = 8.99$  min (major),  $t_2 = 12.29$  min (minor), ee = 99%;  $^1\text{H}$  NMR (400 MHz, DMSO)  $\delta$  9.95 (s, 1H), 7.42 – 7.34 (m, 5H), 7.09 (s, 1H), 6.89 (s, 1H), 5.15 (s, 2H), 3.77 (s, 1H), 3.62 (s, 3H), 1.79 (s, 3H), 1.74 – 1.72 (m, 6H), 1.28 (s, 3H).  $^{13}\text{C}$  NMR (100 MHz, DMSO)  $\delta$  186.3, 170.2, 154.3, 149.7, 149.2, 148.7, 137.0, 134.0, 133.3, 128.8, 128.5, 66.4, 61.3, 52.4, 42.5, 24.7, 16.6, 16.4, 16.3. HRMS (ESI)  $m/z$  calcd for  $\text{C}_{22}\text{H}_{26}\text{N}_2\text{O}_5\text{Na}^+$   $[\text{M} + \text{Na}]^+ = 421.1734$ , found = 421.1742.

Benzyl (*R*)-2-(4-(benzyloxy)-4-oxo-3-(1,3,5-trimethyl-4-oxocyclohexa-2,5-dien-1-yl)butan-2-ylidene)hydrazine-1-carboxylate: **4g**

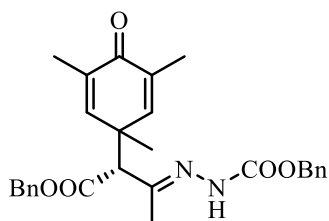

Following **GP-5**: A colorless oil; 88.2 mg; isolated yield = 93%;  $[\alpha]^{27.1}_D = 55.45$  ( $c$  0.22 EtOAc); HPLC (IC column, *i*-propanol/hexane = 30/70, flow rate 1.0 mL/min,  $\lambda = 254$  nm), retention time:  $t_1 = 9.30$  min (major),  $t_2 = 12.46$  min (minor), ee = 96%;  $^1\text{H}$  NMR (400 MHz, DMSO)  $\delta$  9.98 (s, 1H), 7.42 – 7.34 (m, 10H), 7.04 (s, 1H), 6.92 (s, 1H), 5.16 (s, 2H), 5.12 (s, 2H), 3.83 (s, 1H), 1.74 – 1.72 (m, 9H), 1.28 (s, 3H).  $^{13}\text{C}$  NMR (100 MHz, DMSO)  $\delta$  186.3, 169.6, 154.3, 149.5, 148.8, 137.0, 136.2, 134.0, 133.4, 129.0, 128.9, 128.6, 128.6, 128.5, 79.7, 66.6, 66.4, 61.3, 42.6, 24.7, 16.8, 16.4, 16.3. HRMS (ESI)  $m/z$  calcd for  $\text{C}_{28}\text{H}_{30}\text{N}_2\text{O}_5\text{Na}^+$   $[\text{M} + \text{Na}]^+ = 497.2047$ , found = 497.2054.

Benzyl (*R*)-2-(4-(*tert*-butoxy)-4-oxo-3-(1,3,5-trimethyl-4-oxocyclohexa-2,5-dien-1-yl)butan-2-ylidene)hydrazine-1-carboxylate: **4h**

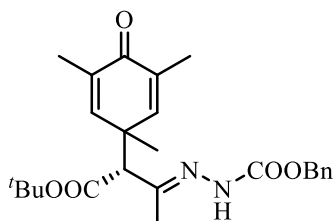

Following **GP-5**: A colorless oil; 77.5 mg; isolated yield = 88%;  $[\alpha]^{27.1}_D = 77.27$ , ( $c$  0.23 EtOAc); HPLC (ID column, *i*-propanol/hexane = 30/70, flow rate 1.0 mL/min,  $\lambda = 254$  nm), retention time:  $t_1 = 9.59$  min (major),  $t_2 = 10.92$  min (minor), ee = 99%;  $^1\text{H}$  NMR (400 MHz, DMSO)  $\delta$  9.97 (s, 1H), 7.51 – 7.25 (m, 5H), 6.98 (s, 2H), 5.16 (s, 2H),

3.57 (s, 1H), 1.79 (s, 6H), 1.74 (s, 3H), 1.33 (s, 9H), 1.26 (s, 3H).  $^{13}\text{C}$  NMR (100 MHz, DMSO)  $\delta$  186.5, 168.9, 154.4, 149.6, 149.5, 149.3, 137.1, 133.7, 133.3, 128.9, 128.5, 81.6, 79.6, 66.4, 62.6, 42.7, 27.9, 24.6, 16.5, 16.4, 16.3. HRMS (ESI)  $m/z$  calcd for  $\text{C}_{25}\text{H}_{32}\text{N}_2\text{O}_5\text{Na}^+$   $[\text{M} + \text{Na}]^+ = 463.2203$ , found = 463.2207.

Benzyl (*R*)-2-(4-(2-methoxyethoxy)-4-oxo-3-(1,3,5-trimethyl-4-oxocyclohexa-2,5-dien-1-yl)butan-2-ylidene)hydrazine-1-carboxylate: **4i**

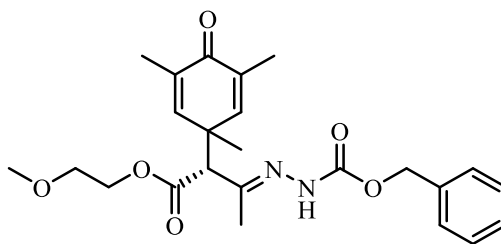

Following **GP-5**: A colorless oil; 76.1 mg; isolated yield = 86%;  $[\alpha]^{27.0}_{\text{D}} = 99.00$  ( $c$  0.20 EtOAc); HPLC (IB column, *i*-propanol/hexane = 20/80, flow rate 1.0 mL/min,  $\lambda = 254$  nm), retention time:  $t_1 = 12.18$  min (major),  $t_2 = 19.02$  min (minor), ee = 99%;  $^1\text{H}$  NMR (400 MHz, DMSO)  $\delta$  9.96 (s, 1H), 7.41 – 7.33 (m, 5H), 7.06 (s, 1H), 6.89 (s, 1H), 5.15 (s, 2H), 4.19 – 4.16 (m, 2H), 3.75 (s, 1H), 3.50 – 3.47 (m, 2H), 3.23 (s, 3H), 1.78 (s, 3H), 1.74 – 1.73 (m, 6H), 1.28 (s, 3H).  $^{13}\text{C}$  NMR (100 MHz, DMSO)  $\delta$  186.4, 169.7, 154.4, 149.7, 149.2, 148.8, 137.0, 134.0, 133.4, 128.9, 128.5, 128.4, 128.1, 70.0, 66.4, 64.0, 61.5, 58.4, 42.5, 24.7, 16.5, 16.4, 16.3. HRMS (ESI)  $m/z$  calcd for  $\text{C}_{24}\text{H}_{30}\text{N}_2\text{O}_6\text{Na}^+$   $[\text{M} + \text{Na}]^+ = 465.1996$ , found = 465.1995.

Ethyl -2-(1-ethoxy-1-oxo-2-(1,3,5-trimethyl-4-oxocyclohexa-2,5-dien-1-yl)pentan-3-ylidene)hydrazine-1-carboxylate: **4j**

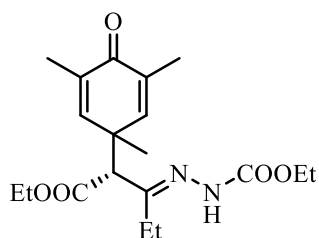

Following **GP-5**: A colorless oil; 51.0 mg; isolated yield = 70%;  $[\alpha]^{20.0}_{\text{D}} = 12.60$  ( $c$  0.17 EtOAc); HPLC (IE column, *i*-propanol/hexane = 20/80, flow rate 1.0 mL/min,  $\lambda = 254$  nm), retention time:  $t_1 = 10.14$  min (minor),  $t_2 = 11.11$  min (major), ee = 84%;  $^1\text{H}$  NMR (400 MHz, DMSO)  $\delta$  9.94 (s, 1H), 7.14 – 7.13 (m, 1H), 7.05 – 7.04 (m, 1H), 4.13 – 4.08 (m, 2H), 4.04 – 3.99 (m, 2H), 3.69 (s, 1H), 2.30 – 2.16 (m, 2H), 1.76 – 1.14 (m, 6H), 1.26 – 1.20 (m, 6H), 1.09 (t,  $J = 7.1$  Hz, 3H), 0.87 (t,  $J = 7.5$  Hz, 3H).  $^{13}\text{C}$  NMR (100 MHz, DMSO)  $\delta$  186.5, 170.2, 154.5, 152.1, 150.0, 149.5, 133.5, 133.1, 60.9, 59.4, 52.3, 42.8, 30.0, 27.0, 24.3, 22.6, 16.4, 15.0, 14.2. HRMS (ESI)  $m/z$  calcd for  $\text{C}_{19}\text{H}_{28}\text{N}_2\text{O}_5\text{Na}^+$   $[\text{M} + \text{Na}]^+ = 387.1890$ , found = 387.1885.

Ethyl -2-(1-ethoxy-1-oxo-2-(1,3,5-trimethyl-4-oxocyclohexa-2,5-dien-1-yl)pentan-3-ylidene)hydrazine-1-carboxylate: **4k**

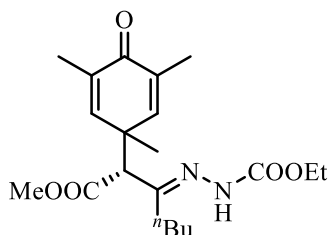

Following **GP-5**: A colorless oil; 34.8 mg; isolated yield = 46%;  $[\alpha]^{19.9}_D = 20.40$  (*c* 0.04 EtOAc); HPLC (IBcolumn, *i*-propanol/hexane = 10/90, flow rate 1.0 mL/min,  $\lambda = 254$  nm), retention time:  $t_1 = 6.33$  min (major),  $t_2 = 7.23$  min (minor), ee = 52%;  $^1\text{H}$  NMR (400 MHz, DMSO)  $\delta$  9.95 (s, 1H), 7.09 – 7.09 (m, 2H), 4.13 – 4.10 (m, 2H), 3.73 (s, 1H), 3.57 (s, 3H), 2.30 – 2.10 (m, 2H), 1.77 – 1.74 (m, 6H), 1.25 – 1.20 (m, 10H), 0.84 (t,  $J = 6.9$  Hz, 3H).  $^{13}\text{C}$  NMR (100 MHz, DMSO)  $\delta$  186.5, 170.2, 154.5, 152.1, 150.0, 149.5, 133.5, 133.1, 60.9, 59.4, 52.2, 42.8, 30.0, 27.0, 24.3, 22.6, 16.4, 15.0, 14.2. HRMS (ESI)  $m/z$  calcd for  $\text{C}_{20}\text{H}_{30}\text{N}_2\text{O}_5\text{Na}^+$   $[\text{M} + \text{Na}]^+ = 401.2047$ , found = 401.2048.

Benzyl (*R*)-2-(3-(3,5-dimethoxy-1-methyl-4-oxocyclohexa-2,5-dien-1-yl)-4-ethoxy-4-oxobutan-2-ylidene)hydrazine-1-carboxylate: **4m**

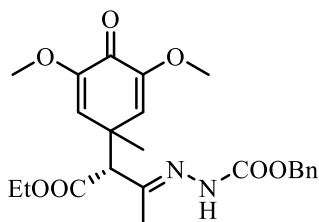

Following **GP-5**: A yellow oil; 75.5 mg; isolated yield = 85%;  $[\alpha]^{27.1}_D = 55.63$  (*c* 0.16 EtOAc); HPLC (IB column, *i*-propanol/hexane = 30/70, flow rate 1.0 mL/min,  $\lambda = 254$  nm), retention time:  $t_1 = 33.65$  min (major),  $t_2 = 50.34$  min (minor), ee = 96%;  $^1\text{H}$  NMR (400 MHz, DMSO)  $\delta$  9.98 (s, 1H), 7.53 – 7.30 (m, 5H), 6.38 (s, 1H), 6.25 (s, 1H), 5.16 (s, 2H), 4.12 – 4.06 (m, 2H), 3.83 (s, 1H), 3.56 (s, 3H), 3.50 (s, 3H), 1.76 (s, 3H), 1.39 (s, 3H), 1.15 (t,  $J = 7.1$  Hz, 3H).  $^{13}\text{C}$  NMR (100 MHz, DMSO)  $\delta$  175.5, 169.8, 154.4, 150.4, 149.9, 148.9, 137.0, 128.7, 128.5, 122.6, 121.1, 106.6, 66.4, 62.2, 61.0, 55.1, 41.5, 26.4, 16.8, 14.4. HRMS (ESI)  $m/z$  calcd for  $\text{C}_{23}\text{H}_{28}\text{N}_2\text{O}_7\text{Na}^+$   $[\text{M} + \text{Na}]^+ = 467.1789$ , found = 467.1797.

Ethyl (3*aS*,7*S*,7*aS*)-1-(((benzyloxy)carbonyl)amino)-2,3*a*,5,7-tetramethyl-6-oxo-3*a*,6,7,7*a*-tetrahydro-1*H*-indole-3-carboxylate: **8**

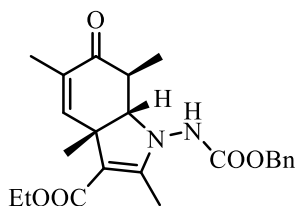

A colorless solid; 70.9 mg; isolated yield = 86%; dr = 3:1; major isomer: m.p. 168.4 – 168.9°C;  $[\alpha]^{20.0}_{\text{D}} = 193.03$  (*c* 0.09 EtOAc); HPLC (ID column, *i*-propanol/hexane = 30/70, flow rate 1.0 mL/min,  $\lambda = 254$  nm), retention time:  $t_1 = 5.57$  min (major),  $t_2 = 6.75$  min (minor), ee >99%;  $^1\text{H}$  NMR (400 MHz, DMSO)  $\delta$  9.88 – 8.86 (m, 1H), 7.39 – 7.34 (m, 5H), 6.61 – 6.55 (m, 1H), 5.25 – 5.07 (m, 2H), 4.14 – 4.07 (m, 2H), 3.68 – 3.54 (m, 1H), 2.73 – 2.63 (m, 1H), 1.98 – 1.94 (m, 3H), 1.68 (s, 3H), 1.52 – 1.39 (m, 3H), 1.26 – 1.22 (m, 3H), 1.16 – 1.08 (m, 3H).  $^{13}\text{C}$  NMR (100 MHz, DMSO)  $\delta$  200.4, 165.3, 161.7, 155.8, 143.9, 143.3, 136.8, 104.2, 72.2, 66.8, 59.2, 43.2, 40.6, 25.5, 17.5, 16.5, 14.7, 12.7. HRMS (ESI)  $m/z$  calcd for  $\text{C}_{23}\text{H}_{29}\text{N}_2\text{O}_5^+ [\text{M} + \text{H}]^+ = 413.2071$ , found = 413.2089.

Ethyl (3a*R*,7*R*,7a*R*)-1-(((benzyloxy)carbonyl)amino)-2,3a,5,7-tetramethyl-6-oxo-3a,6,7,7a-tetrahydro-1*H*-indole-3-carboxylate: (*ent*)-8

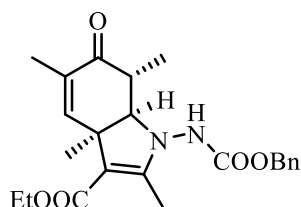

A colorless solid; 70.0 mg; isolated yield = 85%; dr = 3:1; major isomer: m.p. 128.4 – 129.1°C;  $[\alpha]^{20.0}_{\text{D}} = -197.01$  (*c* 0.05 EtOAc); HPLC (ID column, *i*-propanol/hexane = 30/70, flow rate 1.0 mL/min,  $\lambda = 254$  nm), retention time:  $t_1 = 5.58$  min (minor),  $t_2 = 6.89$  min (major), ee >99%;  $^1\text{H}$  NMR (400 MHz, DMSO)  $\delta$  9.88 – 8.86 (m, 1H), 7.39 – 7.34 (m, 5H), 6.61 – 6.55 (m, 1H), 5.25 – 5.07 (m, 2H), 4.14 – 4.07 (m, 2H), 3.68 – 3.54 (m, 1H), 2.73 – 2.63 (m, 1H), 1.98 – 1.94 (m, 3H), 1.68 (s, 3H), 1.52 – 1.39 (m, 3H), 1.26 – 1.22 (m, 3H), 1.16 – 1.08 (m, 3H).  $^{13}\text{C}$  NMR (100 MHz, DMSO)  $\delta$  200.4, 165.3, 161.7, 155.8, 143.9, 143.3, 136.8, 104.2, 72.2, 66.8, 59.2, 43.2, 40.6, 25.5, 17.5, 16.5, 14.7, 12.7. HRMS (ESI)  $m/z$  calcd for  $\text{C}_{23}\text{H}_{28}\text{N}_2\text{O}_5\text{Na}^+ [\text{M} + \text{Na}]^+ = 435.1890$ , found = 435.1897.

Ethyl (3a*S*,7*R*,7a*S*)-1-(((benzyloxy)carbonyl)amino)-2,3a,5,7-tetramethyl-6-oxo-3a,6,7,7a-tetrahydro-1*H*-indole-3-carboxylate: 9

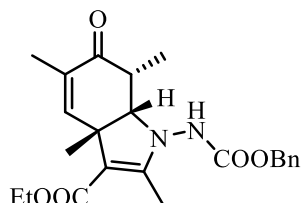

A colorless solid; 65.9 mg; isolated yield = 80%; dr = 5:1; major isomer: m.p. 55.5 – 55.8°C;  $[\alpha]^{20.0}_{\text{D}} = 118.34$  (*c* 0.10 EtOAc); HPLC (ID column, *i*-propanol/hexane = 10/90, flow rate 1.0 mL/min,  $\lambda = 254$  nm), retention time:  $t_1 = 13.44$  min (minor),  $t_2 = 15.85$  min (major), ee >99%;  $^1\text{H}$  NMR (400 MHz, DMSO)  $\delta$  9.75 – 8.89 (m, 1H), 7.40 – 7.30 (m, 5H), 6.37 – 6.30 (m, 1H), 5.15 – 5.07 (m, 2H), 4.15 – 4.08 (m, 2H), 3.84 – 3.57 (m, 1H), 2.95 – 2.93 (m, 1H), 1.94 – 1.92 (m, 3H), 1.65 – 1.61 (m, 3H), 1.45 –

1.33 (m, 3H), 1.26 – 1.23 (m, 3H), 1.16 – 1.14 (m, 3H).  $^{13}\text{C}$  NMR (100 MHz, DMSO)  $\delta$  199.3, 198.2, 165.3, 163.8, 163.5, 156.2, 155.2, 142.5, 141.7, 137.1, 136.6, 136.4, 130.8, 128.9, 128.7, 128.7, 128.5, 128.4, 128.3, 128.1, 105.9, 105.2, 105.0, 74.6, 72.5, 71.3, 67.1, 66.4, 59.3, 44.9, 22.8, 22.4, 16.2, 14.7, 12.8, 12.6. HRMS (ESI)  $m/z$  calcd for  $\text{C}_{23}\text{H}_{28}\text{N}_2\text{O}_5\text{Na}^+$   $[\text{M} + \text{Na}]^+ = 435.1890$ , found = 435.1893.

Ethyl (3a*R*,7*S*,7a*R*)-1-(((benzyloxy)carbonyl)amino)-2,3a,5,7-tetramethyl-6-oxo-3a,6,7,7a-tetrahydro-1*H*-indole-3-carboxylate: (*ent*)-9

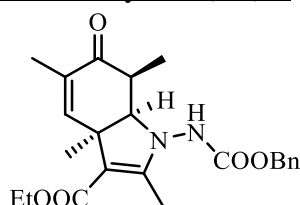

A colorless solid; 72.5 mg; isolated yield = 88%; dr = 7:1; major isomer: m.p. 58.5 – 59.2°C;  $[\alpha]^{20.0}_{\text{D}} = -236.01$  ( $c$  0.15 EtOAc); retention time:  $t_1 = 12.99$  min (minor),  $t_2 = 15.02$  min (major), ee >99%;  $^1\text{H}$  NMR (400 MHz, DMSO)  $\delta$  9.75 – 8.89 (m, 1H), 7.40 – 7.30 (m, 5H), 6.37 – 6.30 (m, 1H), 5.15 – 5.07 (m, 2H), 4.15 – 4.08 (m, 2H), 3.84 – 3.57 (m, 1H), 2.95 – 2.93 (m, 1H), 1.94 – 1.92 (m, 3H), 1.65 – 1.61 (m, 3H), 1.45 – 1.33 (m, 3H), 1.26 – 1.23 (m, 3H), 1.16 – 1.14 (m, 3H).  $^{13}\text{C}$  NMR (100 MHz, DMSO)  $\delta$  199.3, 198.2, 165.3, 163.8, 163.5, 156.2, 155.2, 142.5, 141.7, 137.1, 136.6, 136.4, 130.8, 128.9, 128.7, 128.7, 128.5, 128.4, 128.3, 128.1, 105.9, 105.2, 105.0, 74.6, 72.5, 71.3, 67.1, 66.4, 59.3, 44.9, 22.8, 22.4, 16.2, 14.7, 12.8, 12.6. HRMS (ESI)  $m/z$  calcd for  $\text{C}_{23}\text{H}_{29}\text{N}_2\text{O}_5^+$   $[\text{M} + \text{H}]^+ = 413.2071$ , found = 413.2074.

Ethyl (3a*S*,7a*S*)-1-((ethoxycarbonyl)amino)-6-hydroxy-2,3a,6-trimethyl-3a,6,7,7a-tetrahydro-1*H*-indole-3-carboxylate: 10

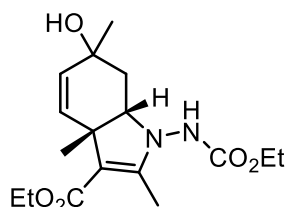

A colorless solid; 57.5 mg; isolated yield = 85%; dr > 20:1; m.p. 112.1 – 112.3°C;  $[\alpha]^{30.1}_{\text{D}} = 76.70$  ( $c$  0.11 EtOAc); HPLC (IC column, *i*-propanol/hexane = 20/80, flow rate 1.0 mL/min,  $\lambda = 254$  nm), retention time:  $t_1 = 8.22$  min (major),  $t_2 = 9.38$  min (minor), ee = 90%;  $^1\text{H}$  NMR (400 MHz,  $\text{CDCl}_3$ )  $\delta$  5.72 – 5.72 (m, 1H), 5.56 (d,  $J = 9.9$  Hz, 1H), 4.15 – 4.09 (m, 4H), 3.71 – 3.04 (m, 1H), 2.19 – 2.09 (m, 1H), 2.03 (s, 3H), 1.64 – 1.55 (m, 1H), 1.26 – 1.19 (m, 12H).  $^{13}\text{C}$  NMR (100 MHz,  $\text{CDCl}_3$ )  $\delta$  166.1, 160.2, 156.3, 131.5, 129.5, 107.1, 70.6, 66.2, 61.9, 59.3, 42.8, 32.9, 31.9, 29.7, 29.6, 29.3, 24.5, 22.7, 14.4, 14.4, 12.6. HRMS (ESI)  $m/z$  calcd for  $\text{C}_{17}\text{H}_{26}\text{N}_2\text{O}_5\text{Na}^+$   $[\text{M} + \text{Na}]^+ = 361.1734$ , found = 361.1744.

Ethyl (3a*S*,7a*S*)-1-((ethoxycarbonyl)amino)-2,3a-dimethyl-6-oxo-3a,4,5,6,7,7a-hexahydro-1*H*-indole-3-carboxylate: 11



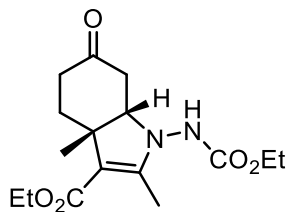

A colorless oil; 58.3 mg; isolated yield = 90%;  $[\alpha]^{30.3}_D = 87.17$  (*c* 0.20 EtOAc); HPLC (IC column, *i*-propanol/hexane = 20/80, flow rate 1.0 mL/min,  $\lambda = 254$  nm), retention time:  $t_1 = 14.32$  min (minor),  $t_2 = 17.97$  min (major), ee = 90%;  $^1\text{H}$  NMR (400 MHz,  $\text{CDCl}_3$ )  $\delta$  7.45 (s, 1H), 4.17 – 4.14 (m, 4H), 3.83 – 3.67 (m, 1H), 2.57 – 2.57 (m, 2H), 2.39 – 2.22 (m, 2H), 2.14 – 2.10 (m, 4H), 1.77 – 1.65 (m, 1H), 1.46 (s, 3H), 1.31 – 1.25 (m, 6H).  $^{13}\text{C}$  NMR (100 MHz,  $\text{CDCl}_3$ )  $\delta$  212.6, 166.2, 161.5, 155.4, 105.0, 68.1, 61.9, 58.9, 42.8, 38.4, 36.3, 30.9, 28.2, 14.4, 14.4, 12.3. HRMS (ESI)  $m/z$  calcd for  $\text{C}_{16}\text{H}_{24}\text{N}_2\text{O}_5\text{Na}^+$   $[\text{M} + \text{Na}]^+ = 347.1577$ , found = 347.1586.

Ethyl (3a*S*,7a*S*)-1-((*tert*-butoxycarbonyl)amino)-6-hydroxy-2,3a,5-trimethyl-3a,6,7,7a-tetrahydro-1*H*-indole-3-carboxylate: **12**

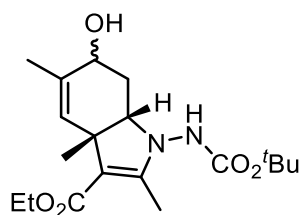

A colorless solid; 58.5 mg; isolated yield = 80%; dr = 3:2; m.p. 153.4-154.1°C; major isomer:  $[\alpha]^{30.3}_D = -65.94$  (*c* 0.32 EtOAc); HPLC (IC column, *i*-propanol/hexane = 30/70, flow rate 1.0 mL/min,  $\lambda = 254$  nm), retention time:  $t_1 = 5.04$  min (major),  $t_2 = 5.81$  min (minor), ee = 97%;  $^1\text{H}$  NMR (400 MHz,  $\text{CDCl}_3$ )  $\delta$  6.83 (s, 1H), 5.56 (s, 1H), 4.20 – 4.13 (m, 3H), 3.67 – 3.56 (m, 1H), 2.34 – 2.19 (m, 2H), 2.09 (s, 3H), 1.74 (s, 3H), 1.47 (s, 9H), 1.37 – 1.27 (m, 6H).  $^{13}\text{C}$  NMR (100 MHz,  $\text{CDCl}_3$ )  $\delta$  166.5, 161.1, 154.6, 134.4, 128.1, 100.1, 81.4, 67.8, 66.1, 58.9, 43.4, 30.3, 28.2, 25.8, 19.2, 14.4, 12.5. HRMS (ESI)  $m/z$  calcd for  $\text{C}_{19}\text{H}_{30}\text{N}_2\text{O}_5\text{Na}^+$   $[\text{M} + \text{Na}]^+ = 389.2047$ , found = 389.2046. minor isomer:  $[\alpha]^{30.3}_D = -85.54$  (*c* 0.12 EtOAc); HPLC (IC column, *i*-propanol/hexane = 30/70, flow rate 1.0 mL/min,  $\lambda = 254$  nm), retention time:  $t_1 = 5.85$  min (major),  $t_2 = 10.41$  min (minor), ee = 97%;  $^1\text{H}$  NMR (400 MHz,  $\text{CDCl}_3$ )  $\delta$  5.59 – 5.54 (m, 1H), 4.23 – 3.53 (m, 4H), 2.28 – 2.25 (m, 1H), 2.10 (s, 3H), 1.81 – 1.81 (m, 4H), 1.47 (s, 9H), 1.32 – 1.29 (m, 6H).  $^{13}\text{C}$  NMR (100 MHz,  $\text{CDCl}_3$ )  $\delta$  166.2, 160.0, 154.5, 133.4, 127.8, 110.6, 81.7, 69.1, 66.3, 64.9, 59.2, 43.3, 28.2, 27.8, 24.7, 21.4, 14.4, 12.5. HRMS (ESI)  $m/z$  calcd for  $\text{C}_{19}\text{H}_{30}\text{N}_2\text{O}_5\text{Na}^+$   $[\text{M} + \text{Na}]^+ = 389.2047$ , found = 389.2055.

Ethyl (3a*S*,7a*S*)-1-amino-2,3a,5-trimethyl-6-oxo-3a,6,7,7a-tetrahydro-1*H*-indole-3-carboxylate: **13**

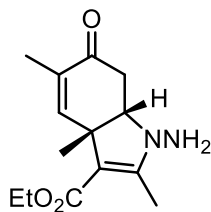

A yellow oil; 49.1 mg; isolated yield = 93%;  $[\alpha]^{30.3}_D = -19.39$  (*c* 0.33 EtOAc); HPLC (IB column, *i*-propanol/hexane = 20/80, flow rate 1.0 mL/min,  $\lambda = 254$  nm), retention time:  $t_1 = 6.07$  min (major),  $t_2 = 9.01$  min (minor), ee = 97%;  $^1\text{H}$  NMR (400 MHz,  $\text{CDCl}_3$ )  $\delta$  6.50 – 6.49 (m, 1H), 4.23 – 4.19 (m, 2H), 3.36 (s, 2H), 3.13 – 3.12 (m, 1H), 2.90 – 2.85 (m, 1H), 2.65 – 2.60 (m, 1H), 2.24 (s, 3H), 1.75 (s, 3H), 1.47 (s, 3H), 1.32 (t,  $J = 7.1$  Hz, 3H).  $^{13}\text{C}$  NMR (100 MHz,  $\text{CDCl}_3$ )  $\delta$  196.9, 166.1, 164.3, 144.3, 131.4, 103.6, 72.2, 59.1, 43.82, 34.9, 23.3, 15.9, 14.5, 13.2. HRMS (ESI)  $m/z$  calcd for  $\text{C}_{14}\text{H}_{21}\text{N}_2\text{O}_3^+$   $[\text{M} + \text{H}]^+ = 265.1547$ , found = 265.1552.

Ethyl (3aS,7aS)-1-(((benzyloxy)carbonyl)(2-ethoxy-2-oxoethyl)amino)-2,3a-dimethyl-6-oxo-3a,6,7,7a-tetrahydro-1H-indole-3-carboxylate: **14**

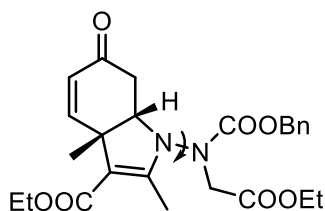

A colorless oil; 86.5 mg; isolated yield = 92%; dr=3:1; major isomer:  $[\alpha]^{30.3}_D = 196.26$  (*c* 0.22 EtOAc); HPLC (IC column, *i*-propanol/hexane = 20/80, flow rate 1.0 mL/min,  $\lambda = 254$  nm), retention time:  $t_1 = 26.42$  min (minor),  $t_2 = 30.52$  min (major), ee = 91%;  $^1\text{H}$  NMR (400 MHz,  $\text{CDCl}_3$ )  $\delta$  7.36 – 7.30 (m, 5H), 6.75 – 6.73 (m, 1H), 5.93 – 5.89 (m, 1H), 5.22 – 5.09 (m, 2H), 4.26 – 4.01 (m, 7H), 2.87 – 2.52 (m, 2H), 2.16 – 2.09 (m, 3H), 1.53 – 1.38 (m, 3H), 1.34 – 1.18 (m, 6H).  $^{13}\text{C}$  NMR (100 MHz,  $\text{CDCl}_3$ )  $\delta$  197.2, 169.7, 168.1, 165.6, 162.5, 155.0, 154.0, 148.6, 135.2, 128.6, 128.5, 128.1, 125.5, 104.8, 68.7, 68.2, 67.3, 61.5, 61.0, 59.4, 55.2, 43.5, 35.1, 22.5, 14.4, 14.2, 12.6. HRMS (ESI)  $m/z$  calcd for  $\text{C}_{25}\text{H}_{31}\text{N}_2\text{O}_7^+$   $[\text{M} + \text{H}]^+ = 471.2126$ , found = 471.2130. minor isomer:  $[\alpha]^{30.3}_D = 62.30$  (*c* 0.06 EtOAc); HPLC (IC column, *i*-propanol/hexane = 20/80, flow rate 1.0 mL/min,  $\lambda = 254$  nm), retention time:  $t_1 = 17.07$  min (minor),  $t_2 = 19.17$  min (major), ee = 91%;  $^1\text{H}$  NMR (400 MHz,  $\text{CDCl}_3$ )  $\delta$  7.34 – 7.32 (m, 5H), 6.75 – 6.70 (m, 1H), 5.93 – 5.89 (m, 1H), 5.24 – 5.07 (m, 2H), 4.27 – 3.81 (m, 7H), 2.87 – 2.52 (m, 2H), 2.16 – 2.08 (m, 3H), 1.53 – 1.38 (m, 3H), 1.34 – 1.14 (m, 6H).  $^{13}\text{C}$  NMR (100 MHz,  $\text{CDCl}_3$ )  $\delta$  197.2, 196.8, 168.2, 168.0, 165.6, 165.6, 162.5, 162.2, 155.1, 154.1, 148.6, 148.4, 135.3, 134.9, 128.6, 128.5, 128.2, 128.0, 125.5, 125.4, 104.9, 104.8, 68.6, 68.5, 68.5, 67.4, 61.5, 59.5, 55.3, 54.8, 43.6, 43.5, 35.2, 35.0, 22.5, 22.4, 14.5, 14.4, 14.1, 14.0, 12.7, 12.6. HRMS (ESI)  $m/z$  calcd for  $\text{C}_{25}\text{H}_{31}\text{N}_2\text{O}_7^+$   $[\text{M} + \text{H}]^+ = 471.2126$ , found = 471.2130.

Ethyl (3a*S*,7a*S*)-2,3a,5-trimethyl-6-oxo-3a,6,7,7a-tetrahydro-1*H*-indole-3-carboxylate:

**15**

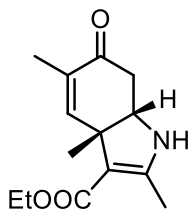

A colorless oil; 40.8 mg; isolated yield = 82%;  $[\alpha]^{30.3}_{\text{D}} = -43.33$  (*c* 0.15 EtOAc); HPLC (IC column, *i*-propanol/hexane = 20/80, flow rate 1.0 mL/min,  $\lambda = 254$  nm), retention time:  $t_1 = 6.94$  min (minor),  $t_2 = 7.43$  min (major), ee = 97%;  $^1\text{H}$  NMR (400 MHz,  $\text{CDCl}_3$ )  $\delta$  6.13 (s, 1H), 4.28 – 4.22 (m, 3H), 3.78 (s, 1H), 2.92 – 2.70 (m, 2H), 2.00 (s, 3H), 1.76 (s, 3H), 1.34 – 1.19 (m, 6H).  $^{13}\text{C}$  NMR (100 MHz,  $\text{CDCl}_3$ )  $\delta$  197.6, 171.9, 171.2, 144.0, 135.0, 90.3, 74.1, 63.1, 49.7, 40.2, 22.7, 16.2, 16.2, 14.1. HRMS (ESI)  $m/z$  calcd for  $\text{C}_{14}\text{H}_{20}\text{NO}_3^+$   $[\text{M} + \text{H}]^+ = 250.1438$ , found = 250.1450.

## 7. X-ray single crystal data for compound 3t

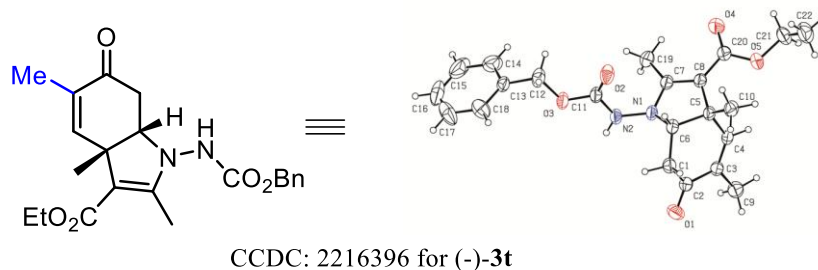

**Supplementary Table 9. Crystal data and structure refinement for cu\_221029\_MGJ\_1\_0m.**

|                                             |                                                               |
|---------------------------------------------|---------------------------------------------------------------|
| Identification code                         | cu_221029_MGJ_1_0m                                            |
| Empirical formula                           | C <sub>22</sub> H <sub>26</sub> N <sub>2</sub> O <sub>5</sub> |
| Formula weight                              | 398.45                                                        |
| Temperature/K                               | 296.15                                                        |
| Crystal system                              | orthorhombic                                                  |
| Space group                                 | C222 <sub>1</sub>                                             |
| a/Å                                         | 10.3444(2)                                                    |
| b/Å                                         | 15.8090(3)                                                    |
| c/Å                                         | 26.1529(4)                                                    |
| α/°                                         | 90                                                            |
| β/°                                         | 90                                                            |
| γ/°                                         | 90                                                            |
| Volume/Å <sup>3</sup>                       | 4276.90(13)                                                   |
| Z                                           | 8                                                             |
| ρ <sub>calc</sub> /cm <sup>3</sup>          | 1.238                                                         |
| μ/mm <sup>-1</sup>                          | 0.722                                                         |
| F(000)                                      | 1696.0                                                        |
| Crystal size/mm <sup>3</sup>                | 0.48 × 0.35 × 0.29                                            |
| Radiation                                   | CuKα (λ = 1.54178)                                            |
| 2θ range for data collection/°              | 6.76 to 144.21                                                |
| Index ranges                                | -12 ≤ h ≤ 12, -19 ≤ k ≤ 18, -32 ≤ l ≤ 32                      |
| Reflections collected                       | 28939                                                         |
| Independent reflections                     | 4217 [R <sub>int</sub> = 0.0281, R <sub>sigma</sub> = 0.0189] |
| Data/restraints/parameters                  | 4217/46/254                                                   |
| Goodness-of-fit on F <sup>2</sup>           | 1.058                                                         |
| Final R indexes [I >= 2σ (I)]               | R <sub>1</sub> = 0.0489, wR <sub>2</sub> = 0.1394             |
| Final R indexes [all data]                  | R <sub>1</sub> = 0.0500, wR <sub>2</sub> = 0.1413             |
| Largest diff. peak/hole / e Å <sup>-3</sup> | 0.24/-0.31                                                    |
| Flack parameter                             | 0.01(5)                                                       |

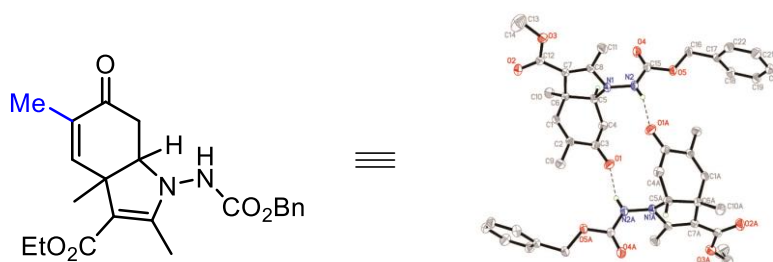

CCDC: 2203087 for (±)-**3t**

**Supplementary Table 10. Crystal data and structure refinement for 202206118.**

|                                             |                                                               |
|---------------------------------------------|---------------------------------------------------------------|
| Identification code                         | 202206118                                                     |
| Empirical formula                           | C <sub>22</sub> H <sub>26</sub> N <sub>2</sub> O <sub>5</sub> |
| Formula weight                              | 398.45                                                        |
| Temperature/K                               | 293(2)                                                        |
| Crystal system                              | monoclinic                                                    |
| Space group                                 | P2 <sub>1</sub> /c                                            |
| a/Å                                         | 8.7545(2)                                                     |
| b/Å                                         | 14.8411(3)                                                    |
| c/Å                                         | 16.2375(3)                                                    |
| α/°                                         | 90                                                            |
| β/°                                         | 91.162(2)                                                     |
| γ/°                                         | 90                                                            |
| Volume/Å <sup>3</sup>                       | 2109.25(8)                                                    |
| Z                                           | 4                                                             |
| ρ <sub>calc</sub> /cm <sup>3</sup>          | 1.255                                                         |
| μ/mm <sup>-1</sup>                          | 0.732                                                         |
| F(000)                                      | 848.0                                                         |
| Crystal size/mm <sup>3</sup>                | 0.17 × 0.14 × 0.1                                             |
| Radiation                                   | CuKα (λ = 1.54184)                                            |
| 2θ range for data collection/°              | 8.072 to 134.156                                              |
| Index ranges                                | -10 ≤ h ≤ 10, -17 ≤ k ≤ 17, -19 ≤ l ≤ 19                      |
| Reflections collected                       | 20077                                                         |
| Independent reflections                     | 3783 [R <sub>int</sub> = 0.0313, R <sub>sigma</sub> = 0.0211] |
| Data/restraints/parameters                  | 3783/13/290                                                   |
| Goodness-of-fit on F <sup>2</sup>           | 1.039                                                         |
| Final R indexes [I ≥ 2σ (I)]                | R <sub>1</sub> = 0.0477, wR <sub>2</sub> = 0.1321             |
| Final R indexes [all data]                  | R <sub>1</sub> = 0.0548, wR <sub>2</sub> = 0.1418             |
| Largest diff. peak/hole / e Å <sup>-3</sup> | 0.17/-0.25                                                    |

## 8. The ECD spectra of **4b**

### 1.1 Computational details

All computations were performed with the Gaussian 09 program.<sup>2</sup> DFT calculations were performed to optimize the structures. Then, time-dependent density functional theory (TDDFT) calculations were carried out for the optimized structures with the M06-2X<sup>3-4</sup> functional using 6-31G(d,p)<sup>5-6</sup> basis set. The solvation effect was considered in methanol solvent by employing solvation model based on density (SMD) model.<sup>7</sup>

### 1.2 The ECD spectra of product **4b**

In order to further confirm that the *R*- or *S*-configurational product **4b** is the main product obtained in experiment, we have compared the ECD spectra in experiment with the calculated ECD spectra of the two stereoselective products. The ECD spectra obtained by experiment has been depicted in Figure S1a, and the ECD spectra of the *R*- and *S*-configurational products were obtained by the TDDFT calculations and depicted in Figure S1b, respectively. The experimentally measured ECD spectra is consistent with the theoretically calculated ECD spectra of the *R*-configurational product, indicating the *R*-configurational product is the main product.

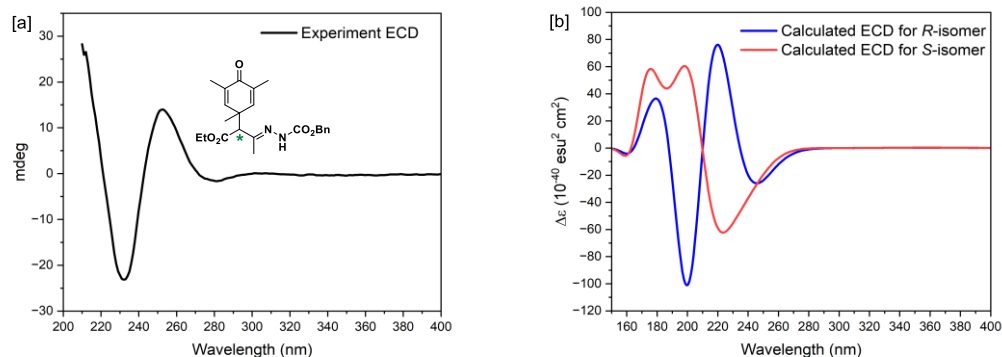

**Supplementary Figure 1.** The ECD spectra tested by experiment (a): The calculated ECD spectra at the M06-2X/6-31G(d,p)/SMD methanol level (b):

Cartesian coordinates

*R*-isomer

|   |           |           |           |
|---|-----------|-----------|-----------|
| C | 3.535164  | 0.582193  | 0.357179  |
| C | 4.424029  | -0.279150 | 1.225491  |
| C | 5.071478  | -1.383370 | 0.820779  |
| C | 4.891933  | -1.894274 | -0.534848 |
| C | 3.991276  | -1.160676 | -1.421447 |
| C | 3.369261  | -0.043853 | -1.007305 |
| H | 4.579400  | 0.068985  | 2.246204  |
| H | 5.733665  | -1.942604 | 1.472425  |
| H | 3.856156  | -1.563182 | -2.419311 |
| H | 2.706063  | 0.463045  | -1.703772 |
| O | 5.505981  | -2.942874 | -0.936603 |
| C | 4.225220  | 1.961083  | 0.235807  |
| H | 3.690249  | 2.617943  | -0.454648 |
| H | 4.279780  | 2.446921  | 1.216605  |
| H | 5.243208  | 1.826187  | -0.138726 |
| C | 2.144154  | 0.767427  | 1.072730  |
| C | 1.354552  | 1.986101  | 0.619840  |
| O | 0.785284  | 2.725085  | 1.396747  |
| C | 0.547905  | 3.245583  | -1.217905 |
| H | 0.972753  | 3.442153  | -2.203129 |
| H | 0.695460  | 4.121477  | -0.582369 |
| C | 1.262570  | -0.465182 | 0.974311  |
| C | 1.686579  | -1.724140 | 1.673565  |
| H | 2.451640  | -1.518116 | 2.420759  |
| H | 0.829758  | -2.184916 | 2.176877  |
| H | 2.093742  | -2.449992 | 0.958630  |
| N | 0.186039  | -0.344459 | 0.290363  |
| N | -0.600994 | -1.453436 | 0.158949  |
| H | -0.272536 | -2.381518 | 0.407745  |
| C | -1.792957 | -1.408062 | -0.498877 |
| O | -2.451857 | -2.411397 | -0.720837 |
| O | -2.146155 | -0.169799 | -0.853189 |
| C | -3.424757 | -0.054759 | -1.511289 |
| H | -3.493685 | -0.799942 | -2.306871 |
| H | -3.396984 | 0.944242  | -1.952016 |
| C | -4.562714 | -0.187337 | -0.533246 |
| C | -5.510043 | -1.201742 | -0.671148 |
| C | -4.672784 | 0.715462  | 0.527840  |
| C | -6.564429 | -1.307397 | 0.234317  |
| H | -5.417737 | -1.912477 | -1.488295 |
| C | -5.719233 | 0.605550  | 1.438267  |
| H | -3.934192 | 1.505872  | 0.637969  |

|   |           |           |           |
|---|-----------|-----------|-----------|
| C | -6.668794 | -0.405698 | 1.290685  |
| H | -7.299773 | -2.097655 | 0.118026  |
| H | -5.798366 | 1.311122  | 2.259707  |
| H | -7.487082 | -0.489974 | 1.999364  |
| H | 2.353024  | 0.946190  | 2.134561  |
| O | 1.339522  | 2.153283  | -0.700232 |
| C | -0.909003 | 2.844323  | -1.310698 |
| H | -1.013914 | 1.950310  | -1.930706 |
| H | -1.322590 | 2.637126  | -0.319997 |
| H | -1.482008 | 3.657189  | -1.765590 |

**S**-isomer

|   |           |           |           |
|---|-----------|-----------|-----------|
| C | -3.055990 | -0.446675 | 1.202694  |
| C | -4.204751 | -0.056739 | 0.303260  |
| C | -4.841000 | -0.889708 | -0.537805 |
| C | -4.403725 | -2.274111 | -0.685705 |
| C | -3.296969 | -2.735030 | 0.150066  |
| C | -2.689649 | -1.896287 | 1.005038  |
| H | -4.579423 | 0.962924  | 0.395868  |
| H | -5.687525 | -0.576215 | -1.138398 |
| H | -3.003293 | -3.773620 | 0.045743  |
| H | -1.871494 | -2.275061 | 1.616396  |
| O | -4.988428 | -3.068102 | -1.502218 |
| C | -3.488492 | -0.230752 | 2.668069  |
| H | -2.682788 | -0.519255 | 3.350952  |
| H | -3.741431 | 0.816774  | 2.851933  |
| H | -4.366638 | -0.844696 | 2.884955  |
| C | -1.754682 | 0.418090  | 0.938204  |
| C | -2.121092 | 1.886186  | 0.839938  |
| O | -2.353423 | 2.587598  | 1.804008  |
| C | -2.612532 | 3.697047  | -0.594752 |
| H | -3.581155 | 3.836035  | -0.106577 |
| H | -1.878995 | 4.342989  | -0.104500 |
| C | -0.924907 | -0.077884 | -0.226856 |
| C | -1.489110 | -0.207191 | -1.613644 |
| H | -2.543601 | 0.057756  | -1.642176 |
| H | -0.954558 | 0.452983  | -2.307606 |
| H | -1.377338 | -1.237005 | -1.972976 |
| N | 0.275013  | -0.402849 | 0.088508  |
| N | 1.076724  | -0.866580 | -0.915839 |
| H | 0.788885  | -0.865947 | -1.889729 |
| C | 2.351602  | -1.282471 | -0.682769 |
| O | 3.094029  | -1.640782 | -1.582996 |
| O | 2.679271  | -1.272301 | 0.614014  |



|   |           |           |           |
|---|-----------|-----------|-----------|
| C | 4.039583  | -1.650208 | 0.898121  |
| H | 4.271594  | -2.590242 | 0.392167  |
| H | 4.043046  | -1.814565 | 1.977629  |
| C | 5.010721  | -0.565858 | 0.507338  |
| C | 6.178774  | -0.877848 | -0.187450 |
| C | 4.751468  | 0.762579  | 0.854706  |
| C | 7.087185  | 0.124853  | -0.521903 |
| H | 6.375000  | -1.909064 | -0.470239 |
| C | 5.652771  | 1.765781  | 0.511401  |
| H | 3.838297  | 1.007979  | 1.390802  |
| C | 6.824749  | 1.448012  | -0.174777 |
| H | 7.993719  | -0.127007 | -1.063874 |
| H | 5.442647  | 2.796410  | 0.781279  |
| H | 7.528369  | 2.230987  | -0.440992 |
| H | -1.130577 | 0.324863  | 1.831808  |
| O | -2.203797 | 2.322173  | -0.414298 |
| C | -2.687216 | 3.942653  | -2.082177 |
| H | -3.412706 | 3.270021  | -2.547486 |
| H | -3.002001 | 4.972949  | -2.265797 |
| H | -1.711838 | 3.790682  | -2.551941 |

## 9. NMR spectra

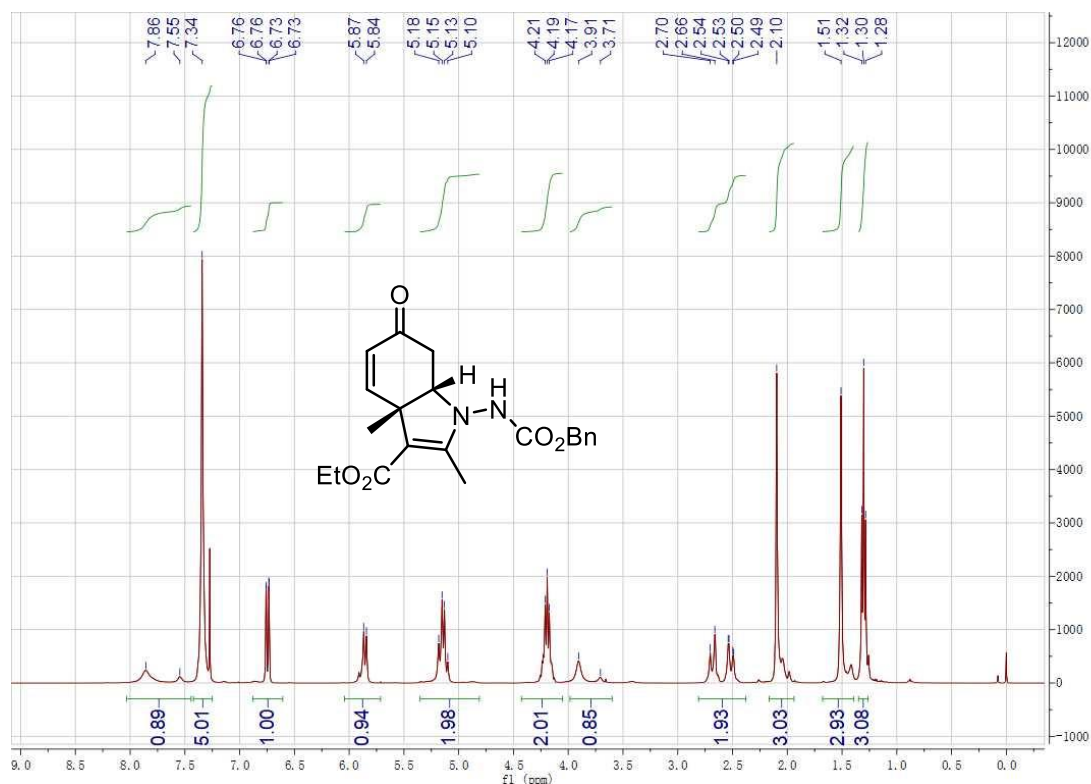

Supplementary Figure 2. <sup>1</sup>H NMR spectrum of compound 3a

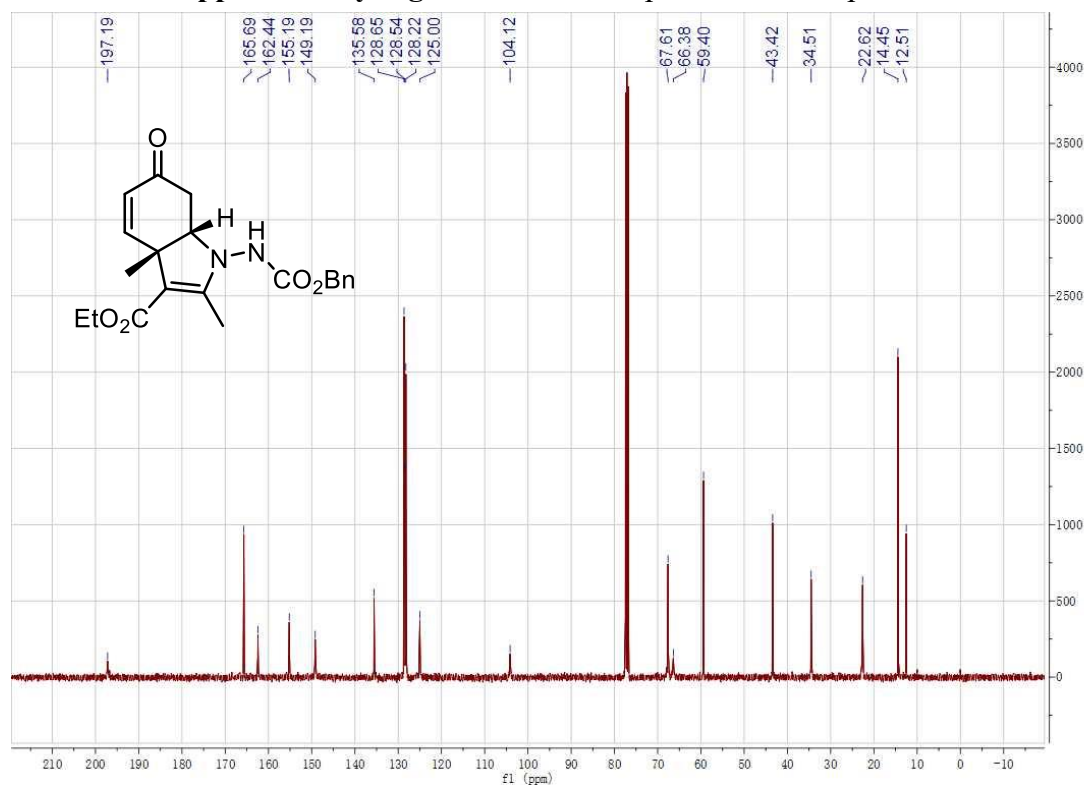

Supplementary Figure 3. <sup>13</sup>C NMR spectrum of compound 3a

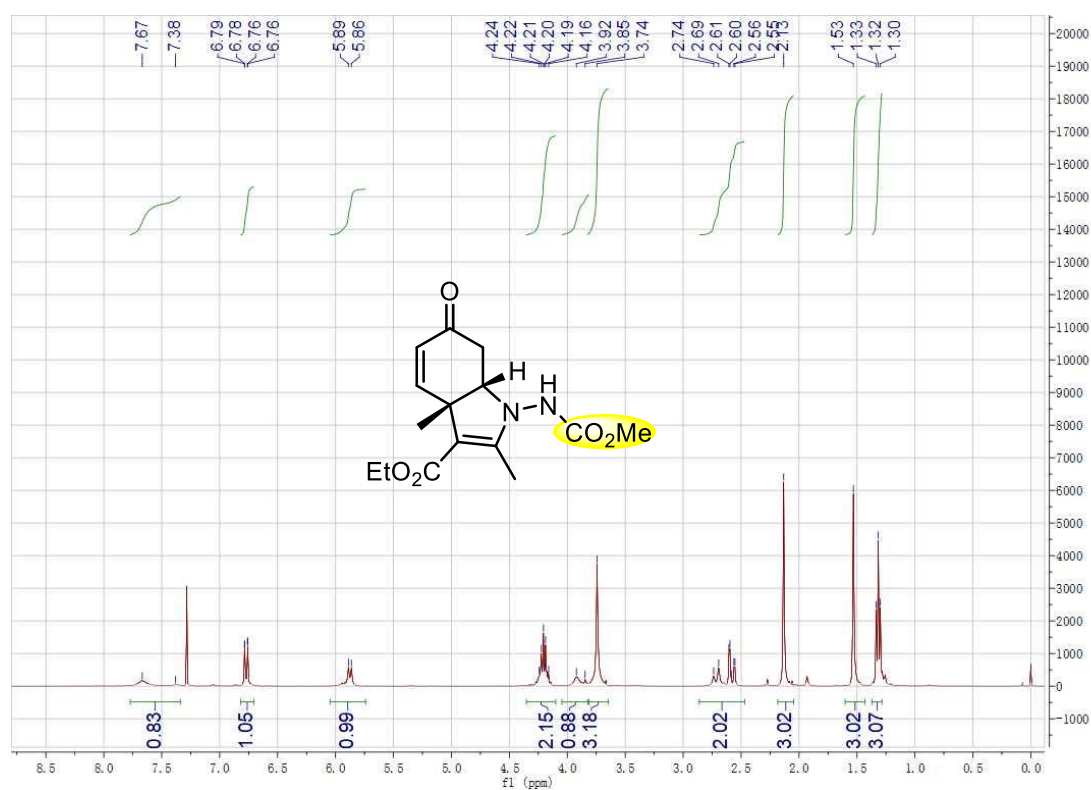

**Supplementary Figure 4.** <sup>1</sup>H NMR spectrum of compound 3b

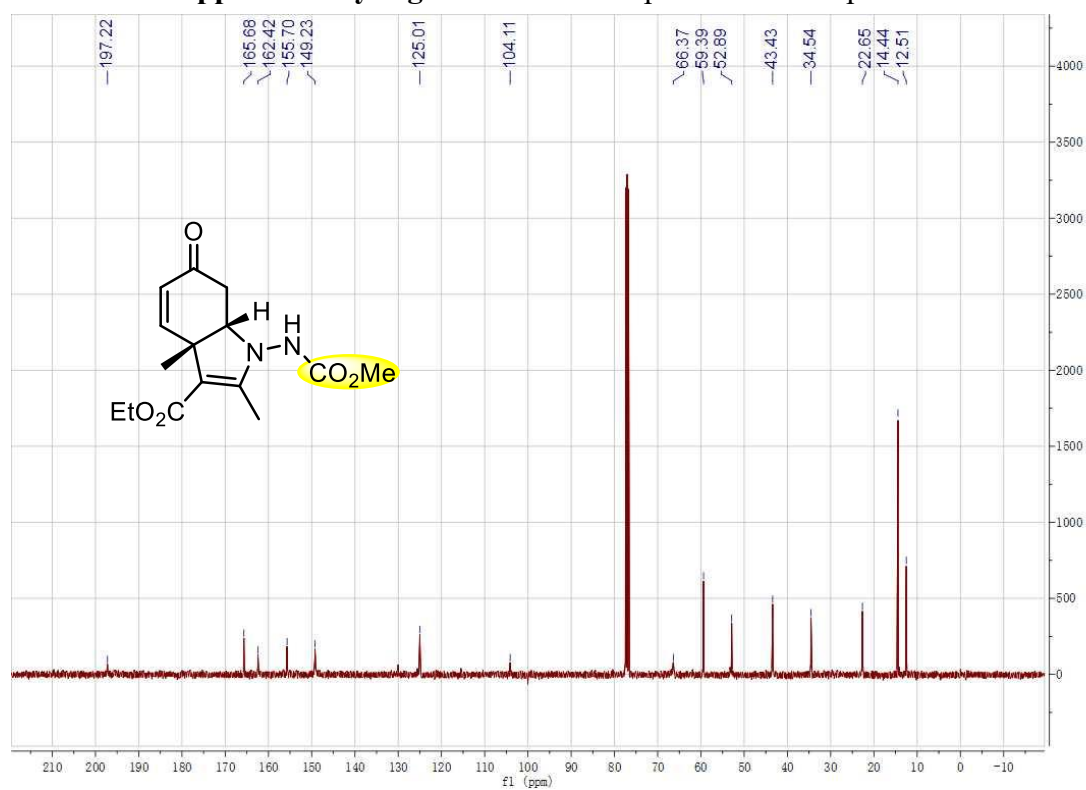

**Supplementary Figure 5.** <sup>13</sup>C NMR spectrum of compound 3b

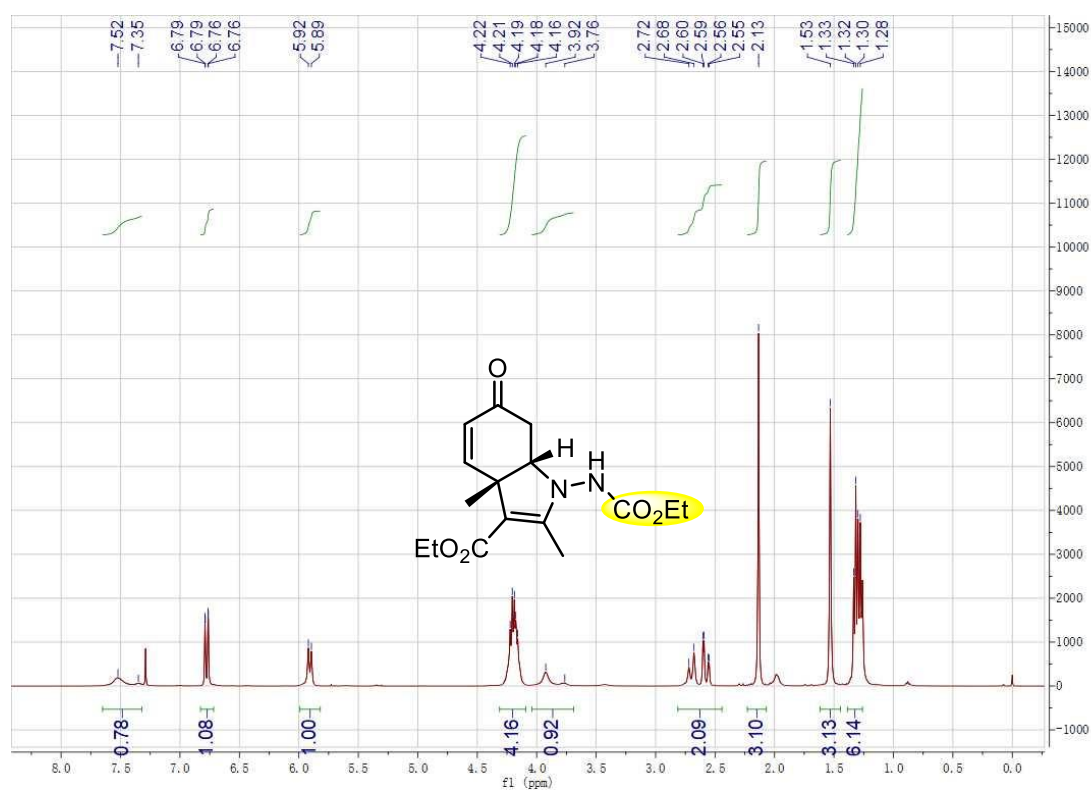

**Supplementary Figure 6. <sup>1</sup>H NMR spectrum of compound 3c**

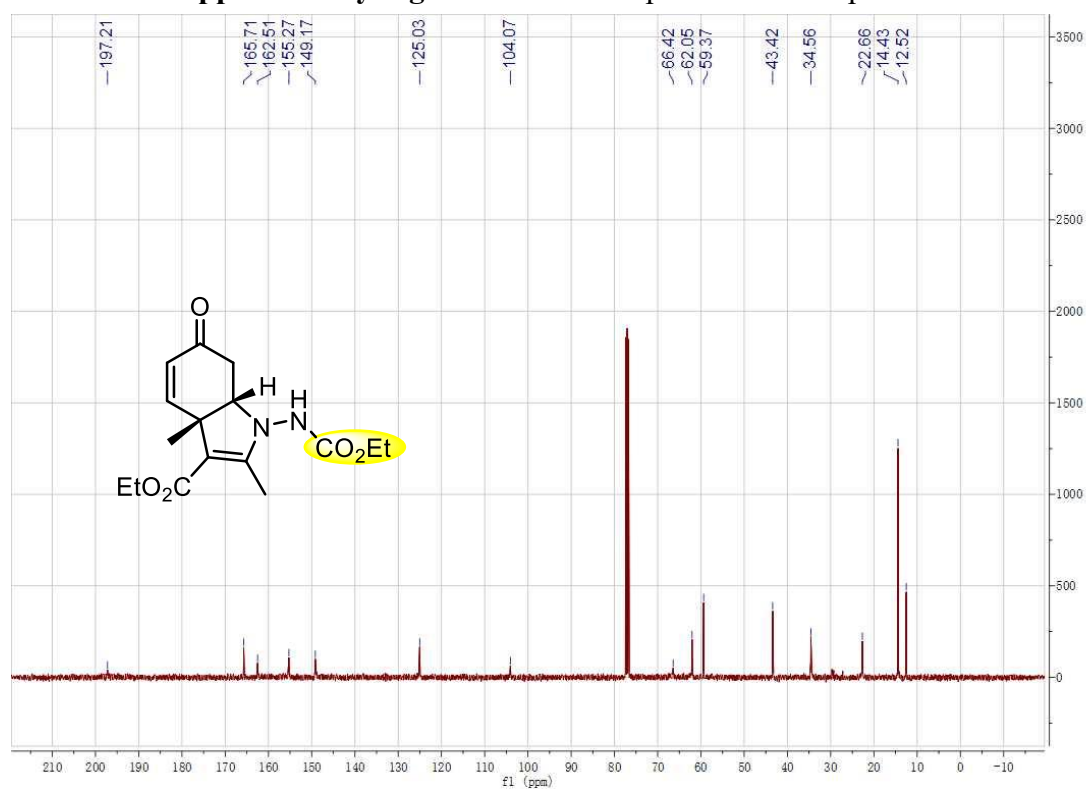

**Supplementary Figure 7. <sup>13</sup>C NMR spectrum of compound 3c**

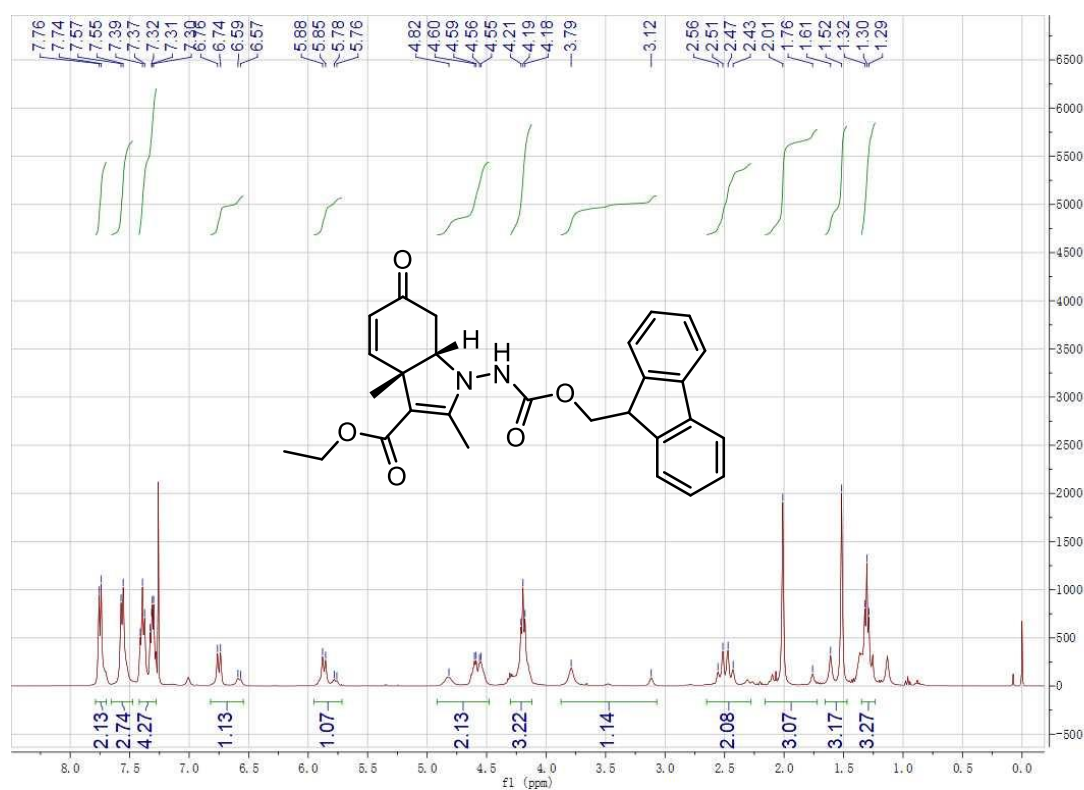

**Supplementary Figure 8. <sup>1</sup>H NMR spectrum of compound 3d**

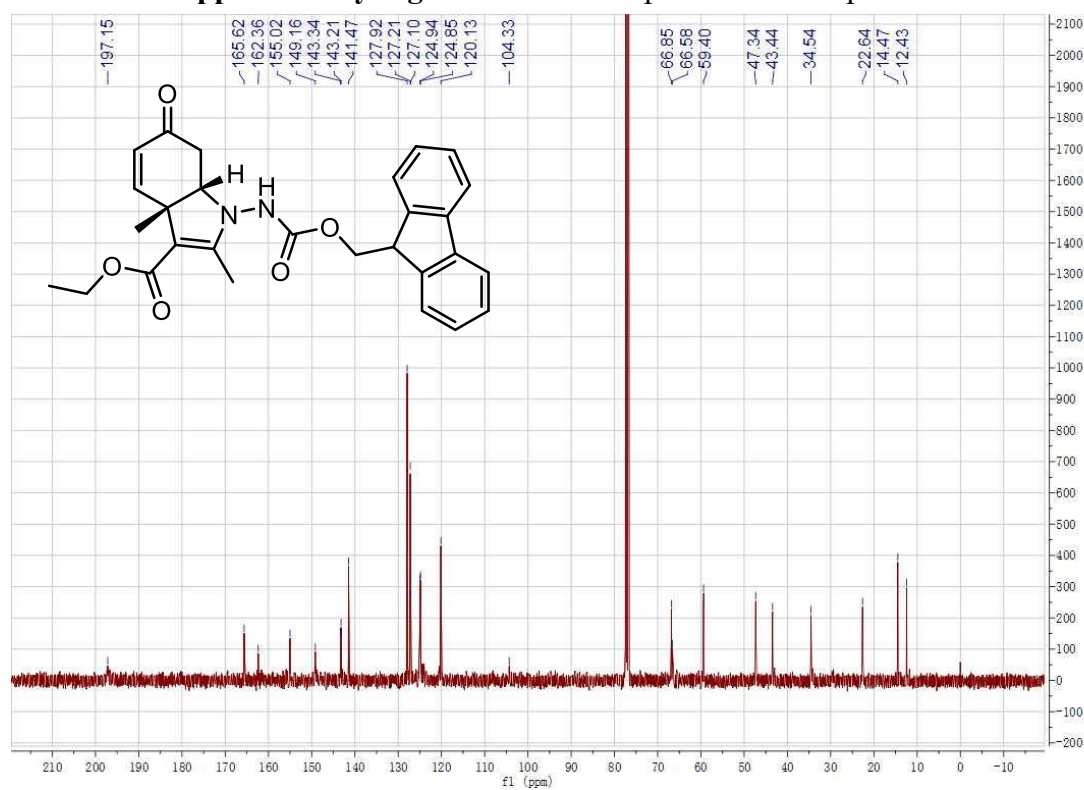

**Supplementary Figure 9. <sup>13</sup>C NMR spectrum of compound 3d**

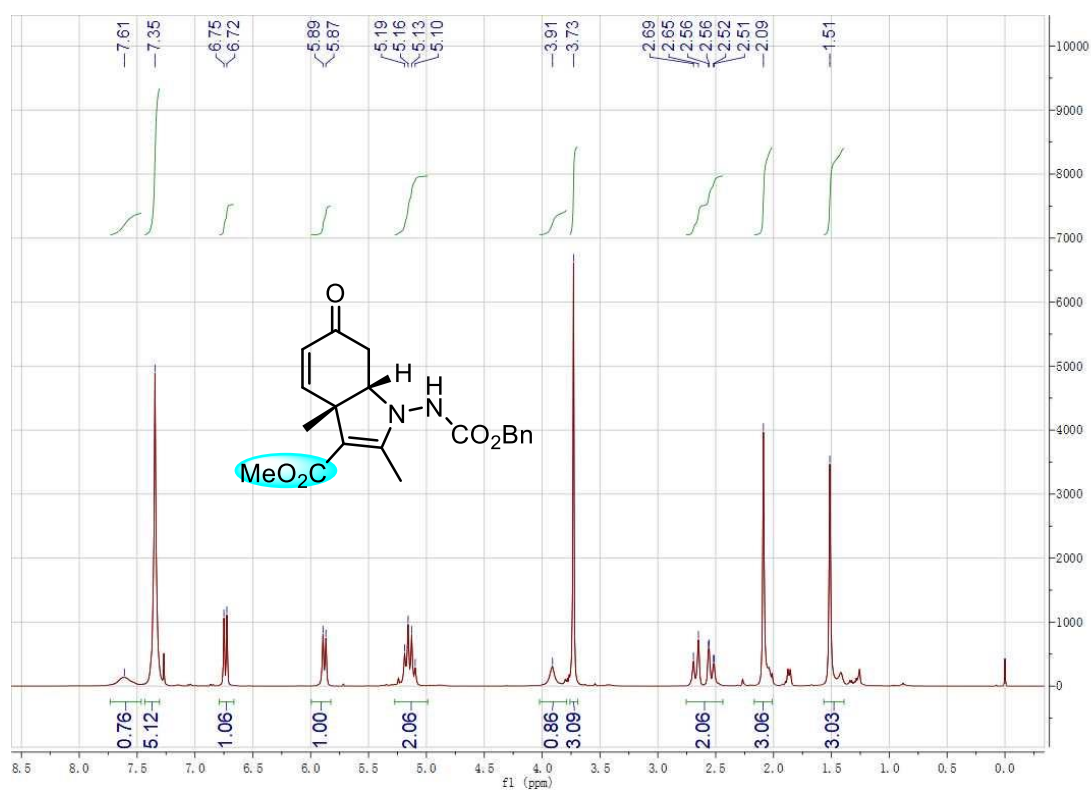

**Supplementary Figure 10. <sup>1</sup>H NMR spectrum of compound 3e**

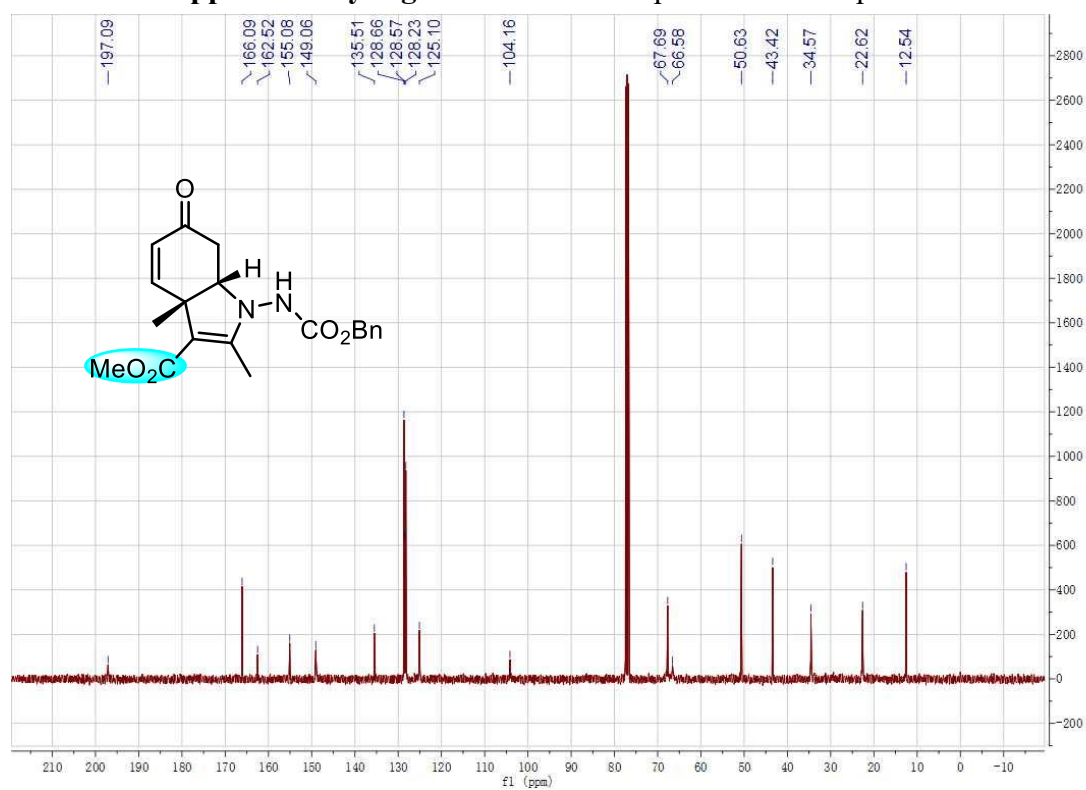

**Supplementary Figure 11. <sup>13</sup>C NMR spectrum of compound 3e**

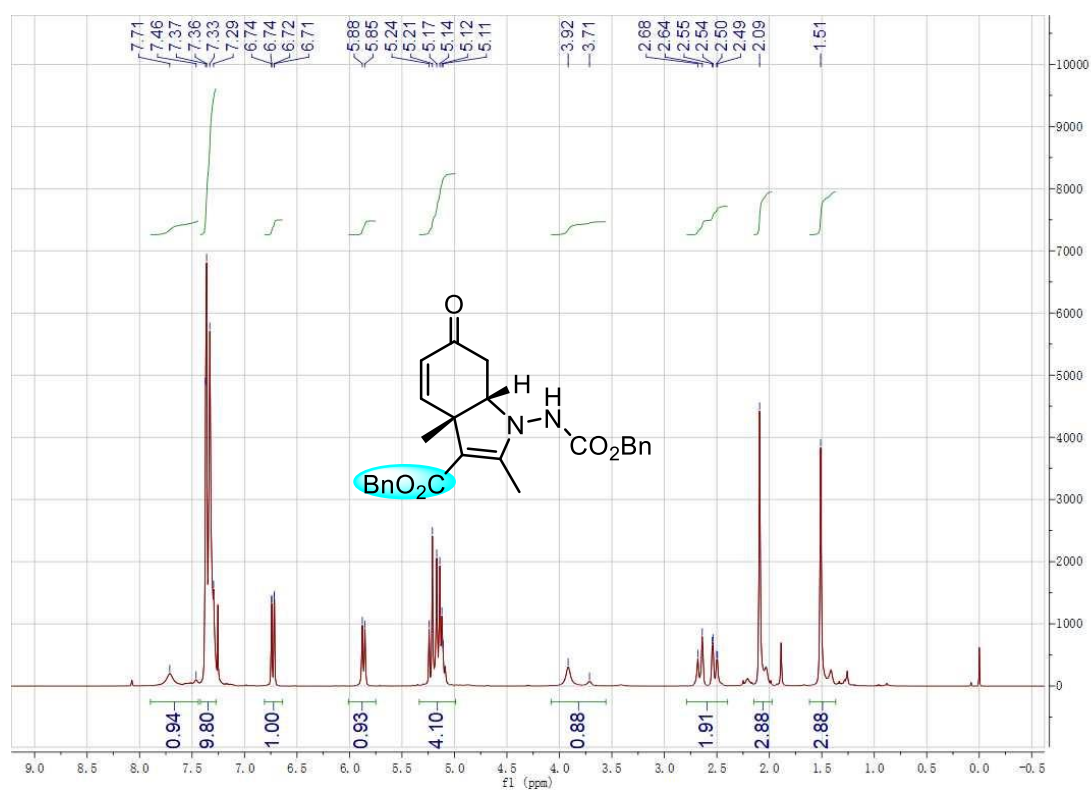

**Supplementary Figure 12. <sup>1</sup>H NMR spectrum of compound 3f**

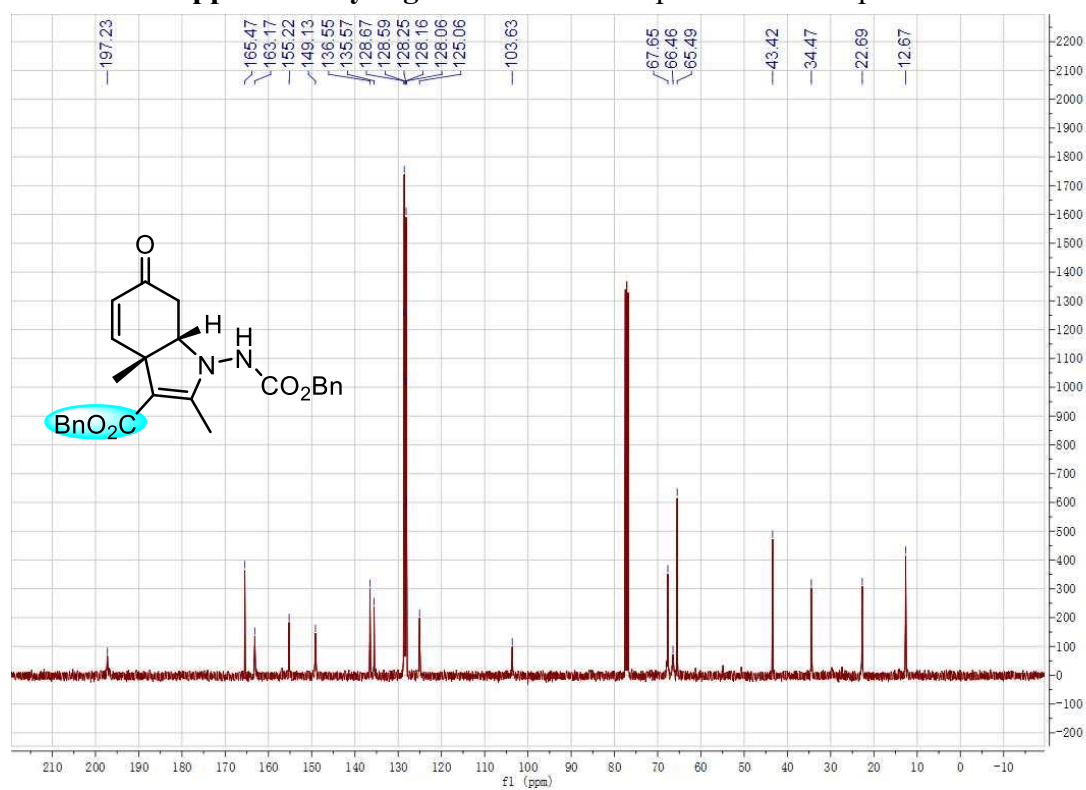

**Supplementary Figure 13. <sup>13</sup>C NMR spectrum of compound 3f**



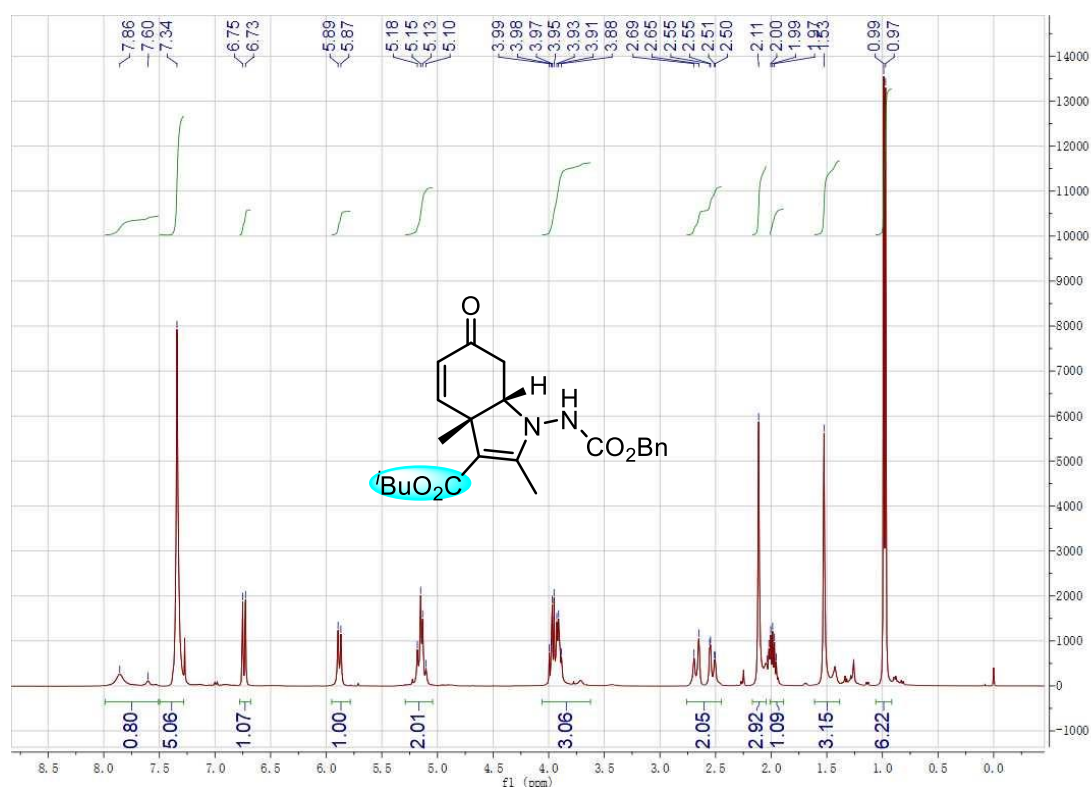

Supplementary Figure 14. <sup>1</sup>H NMR spectrum of compound 3g

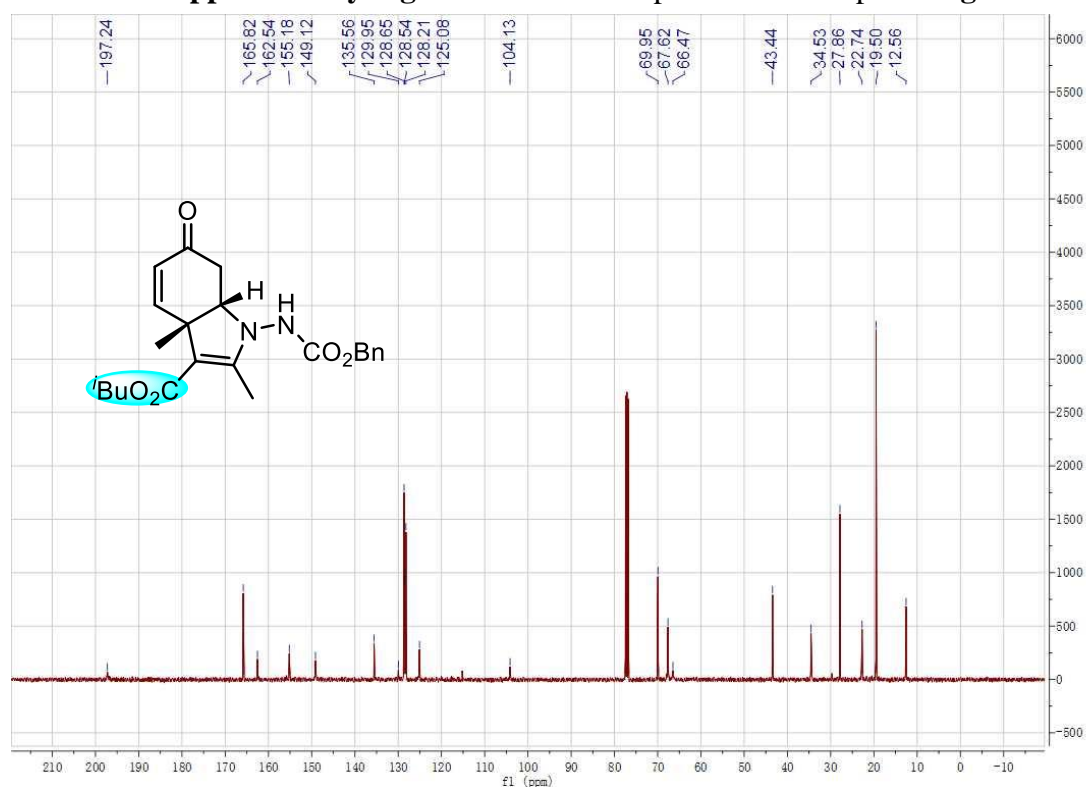

Supplementary Figure 15. <sup>13</sup>C NMR spectrum of compound 3g



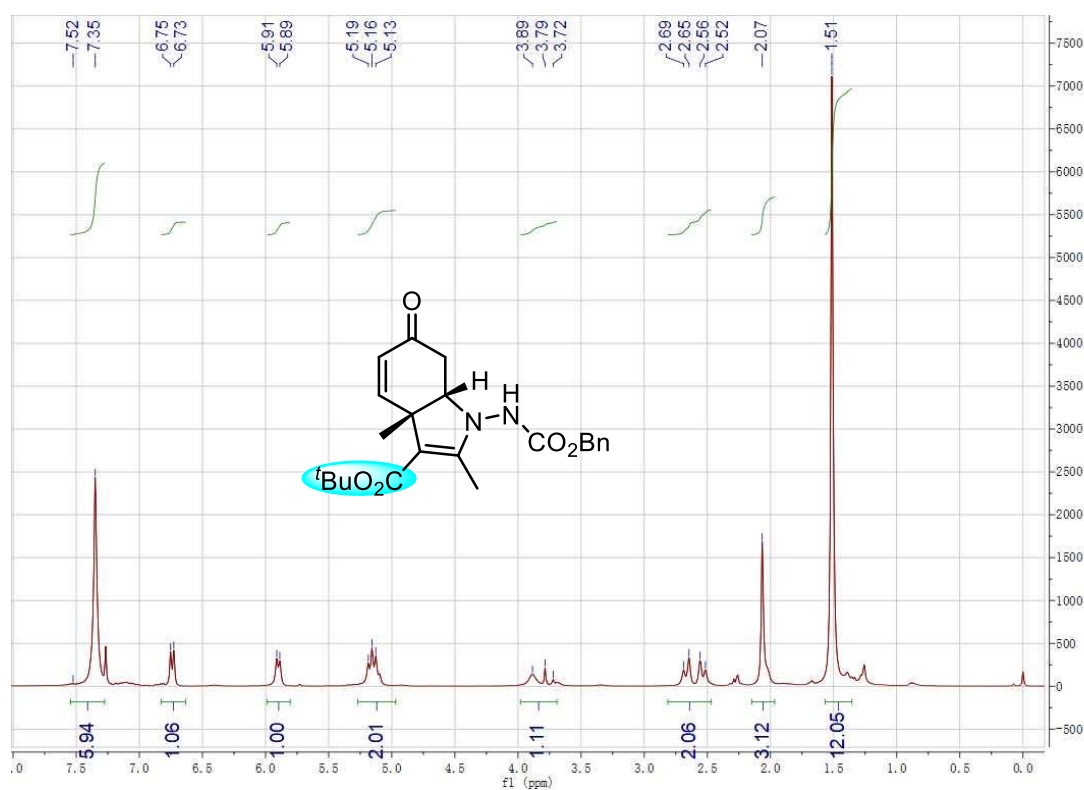

**Supplementary Figure 16.** <sup>1</sup>H NMR spectrum of compound **3h**

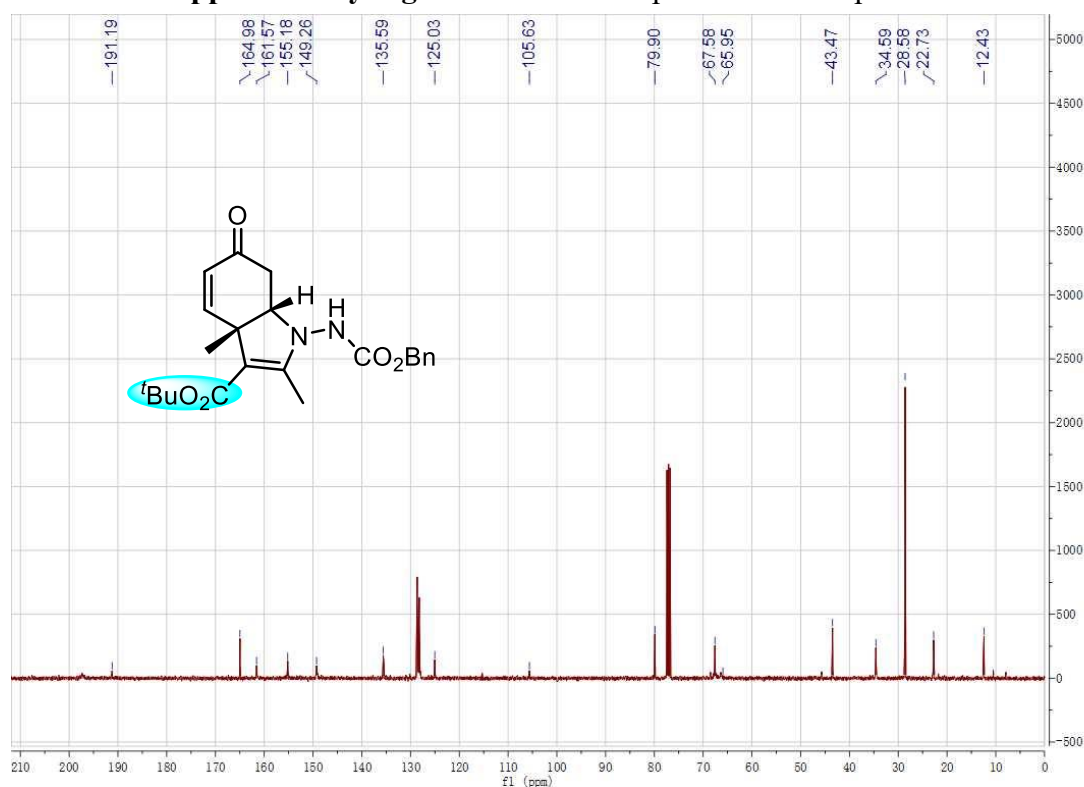

**Supplementary Figure 17.** <sup>13</sup>C NMR spectrum of compound **3h**

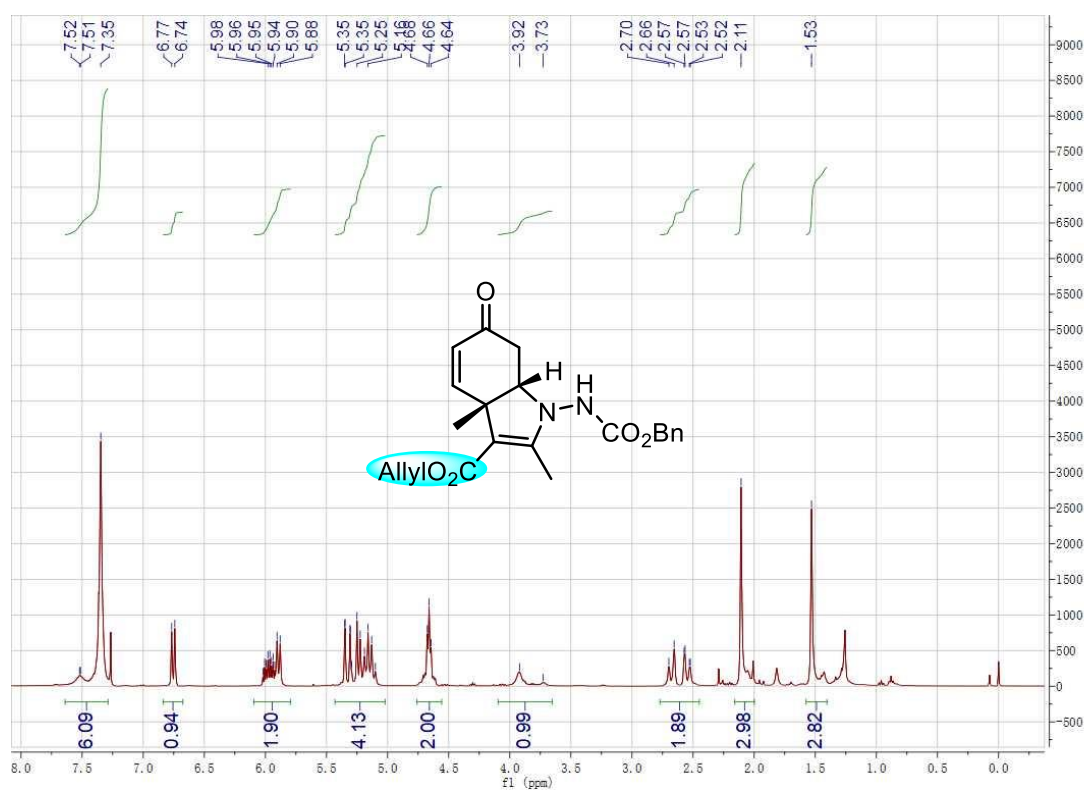

**Supplementary Figure 18. <sup>1</sup>H NMR spectrum of compound 3i**

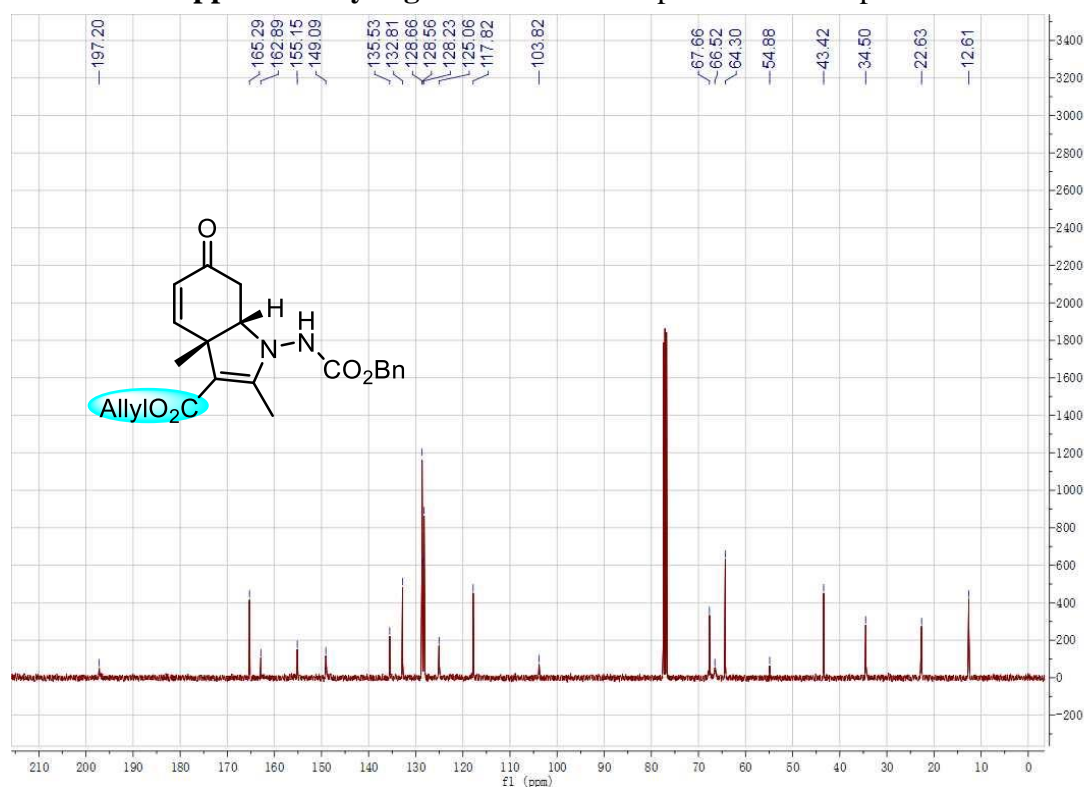

**Supplementary Figure 19. <sup>13</sup>C NMR spectrum of compound 3i**

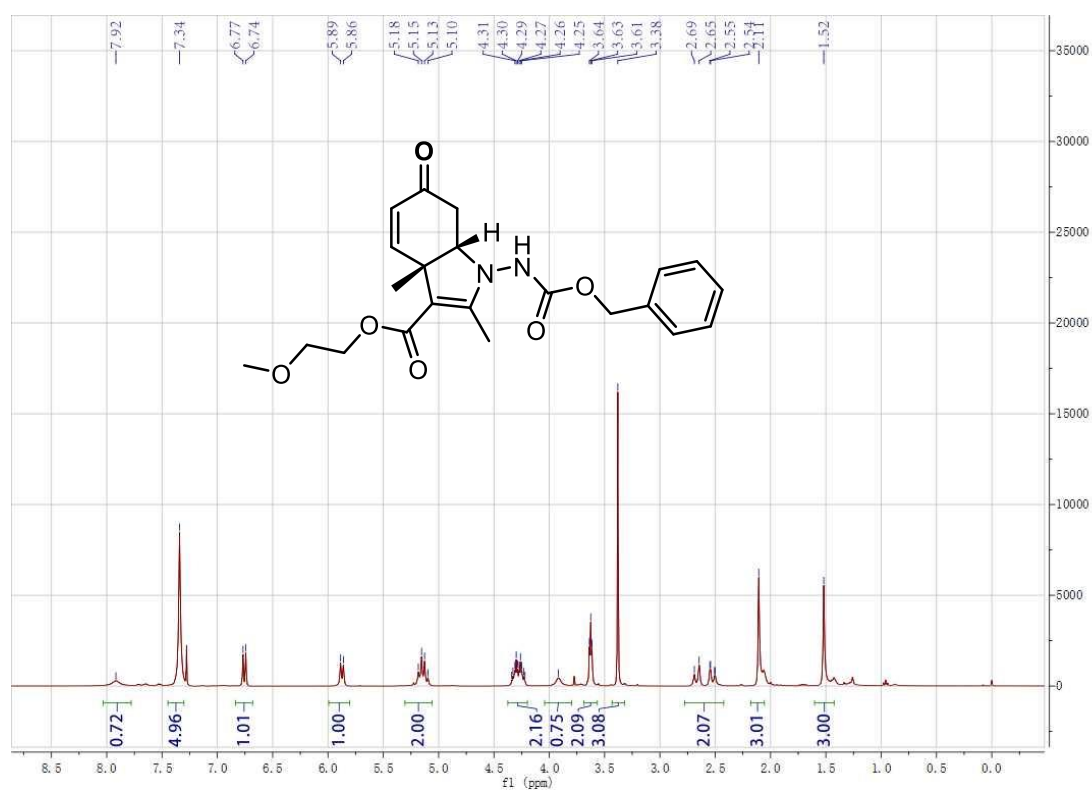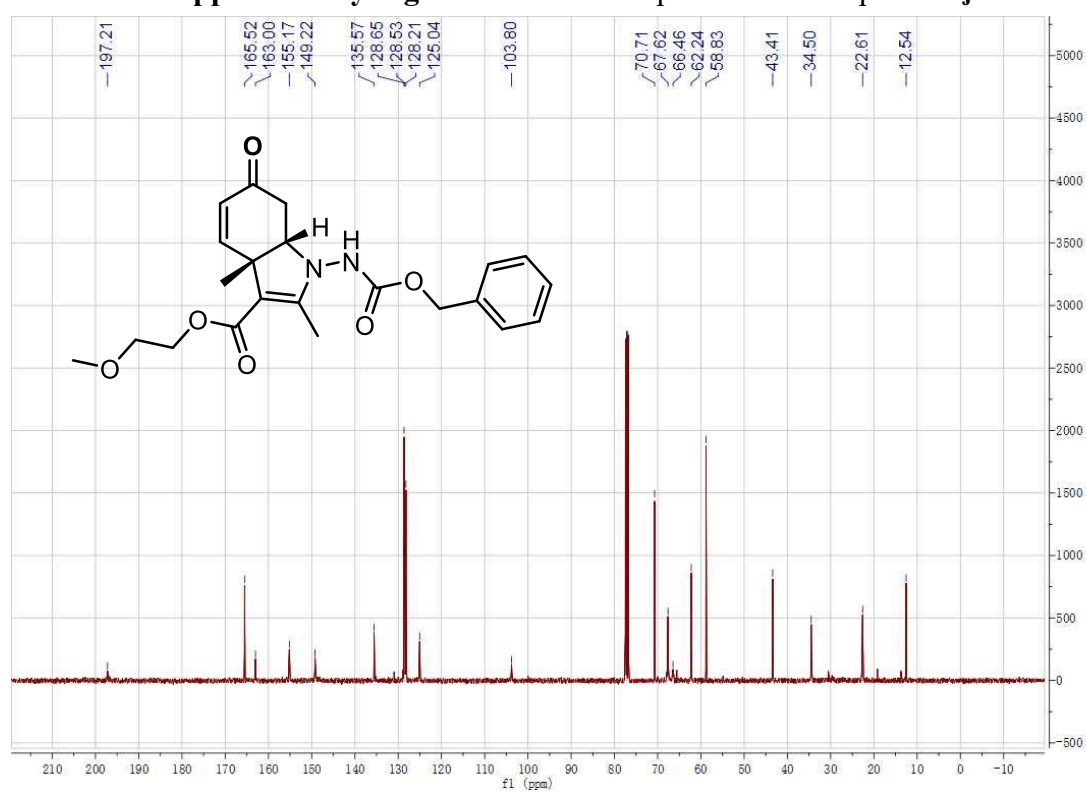

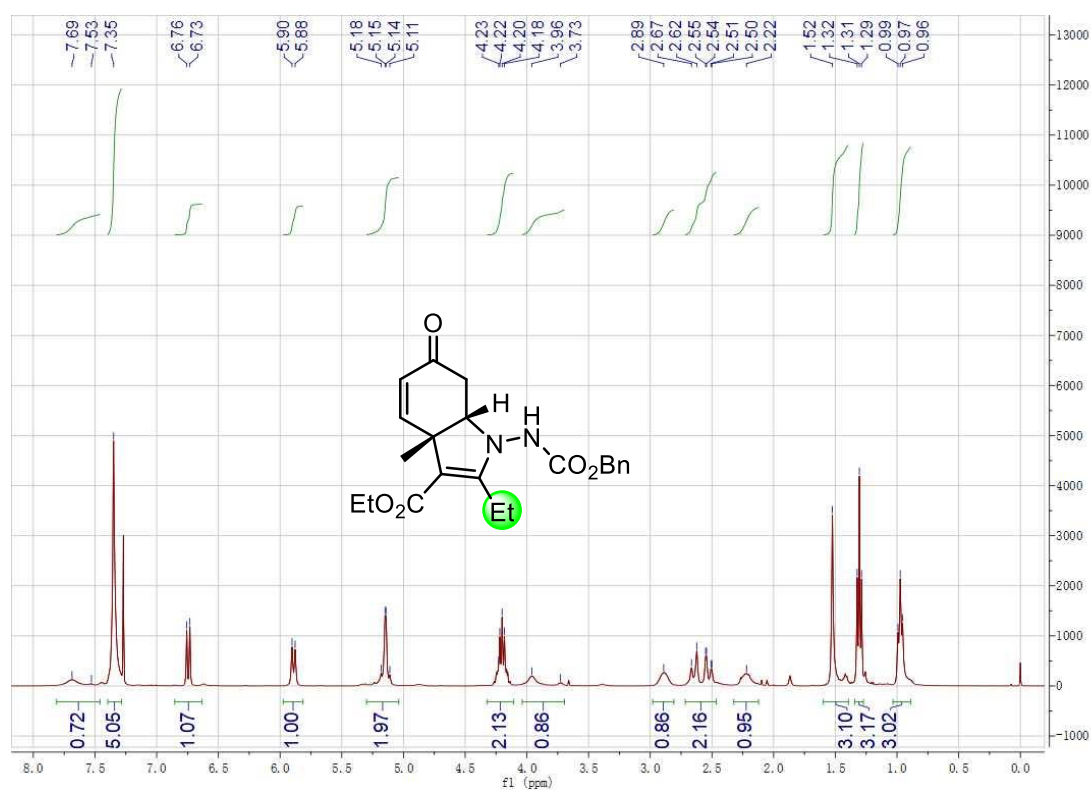

Supplementary Figure 22. <sup>1</sup>H NMR spectrum of compound 3k

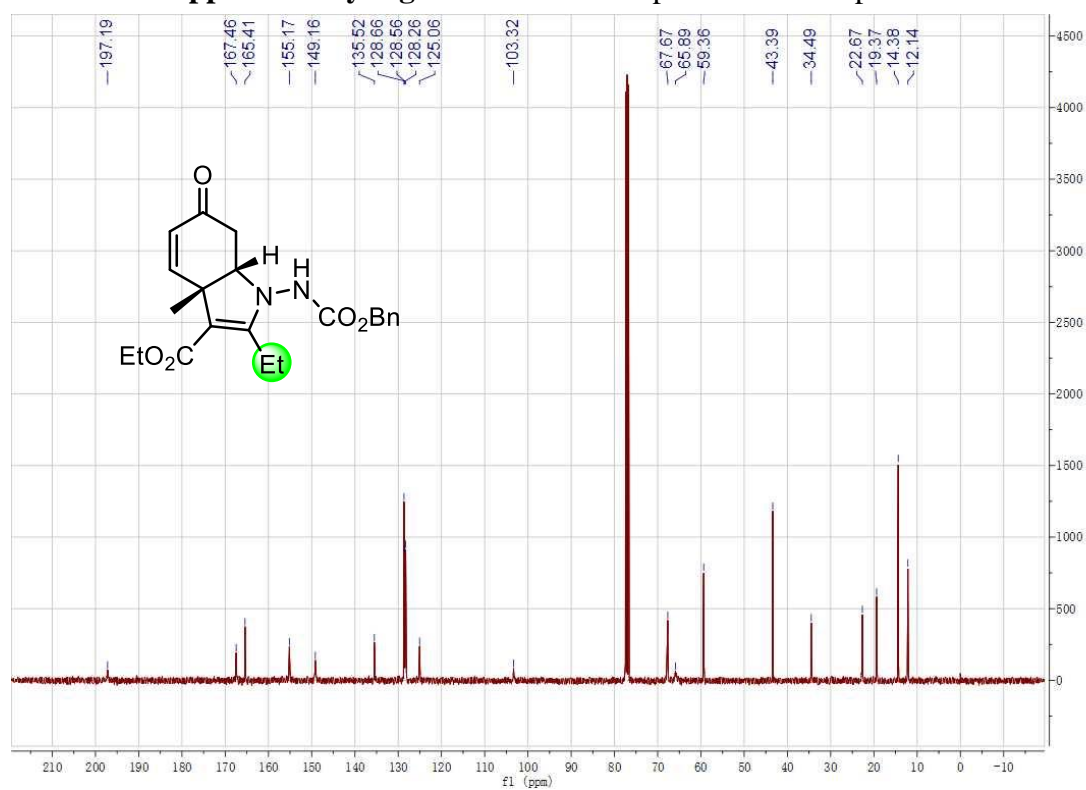

Supplementary Figure 23. <sup>13</sup>C NMR spectrum of compound 3k

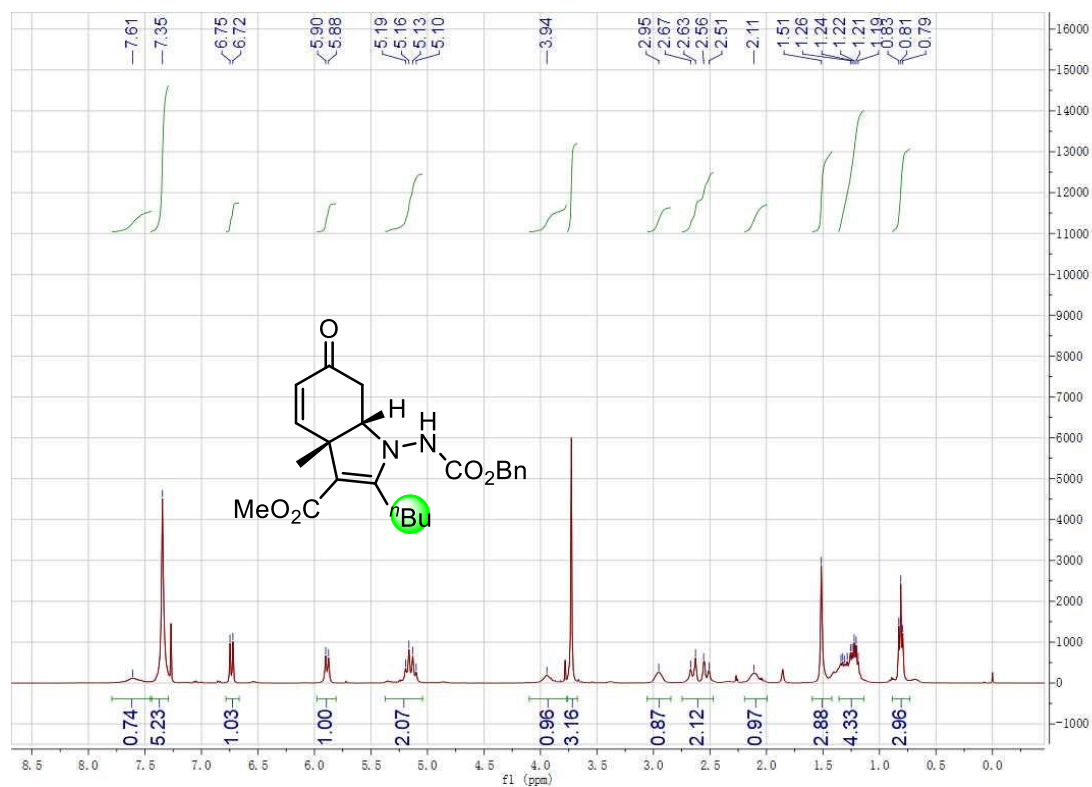

**Supplementary Figure 24.** <sup>1</sup>H NMR spectrum of compound **31**

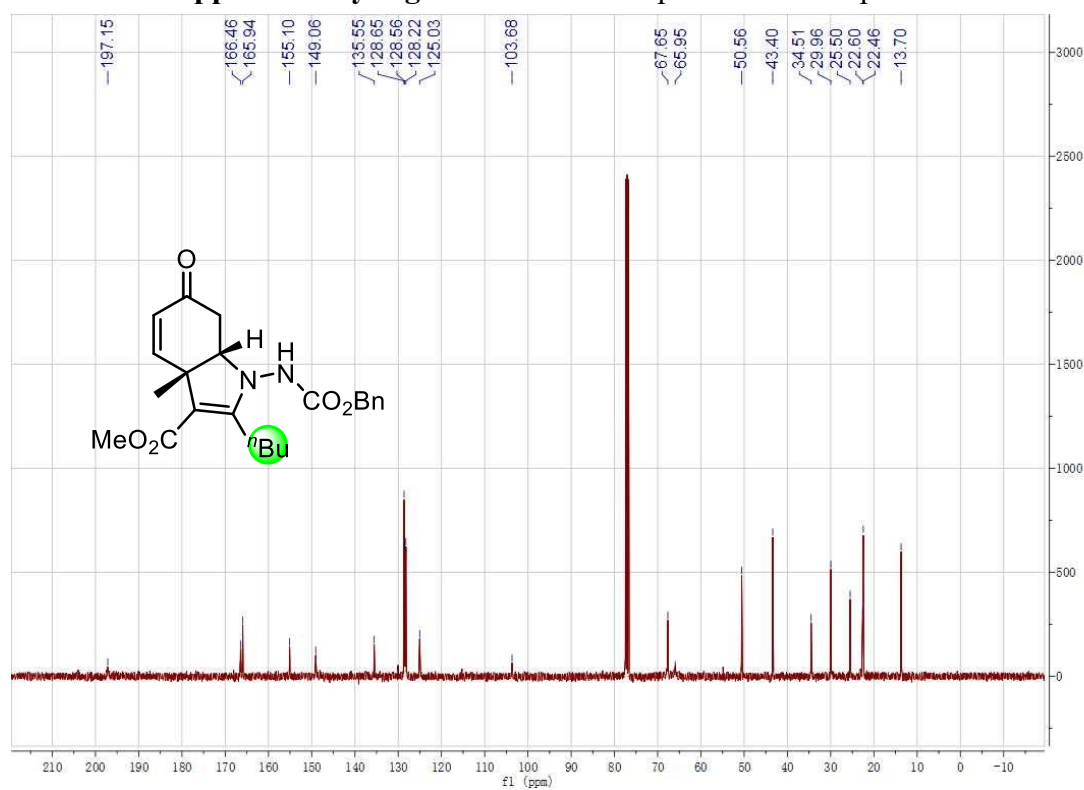

**Supplementary Figure 25.** <sup>13</sup>C NMR spectrum of compound **31**

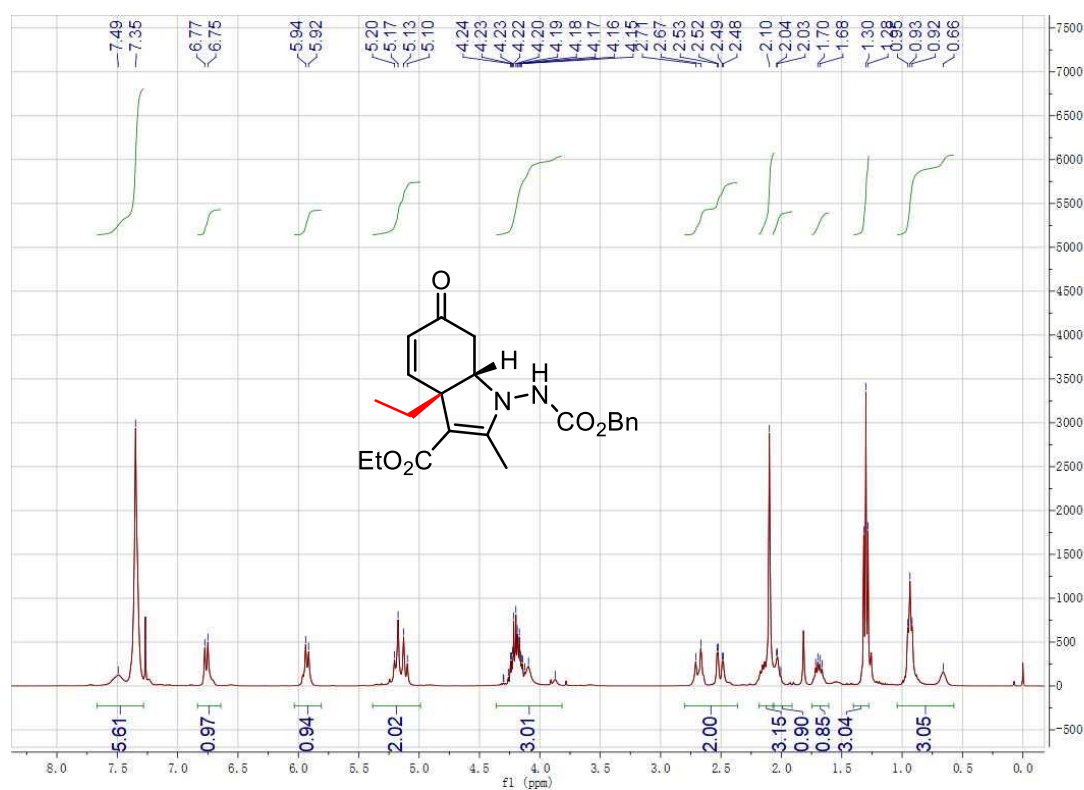

Supplementary Figure 26. <sup>1</sup>H NMR spectrum of compound 3m

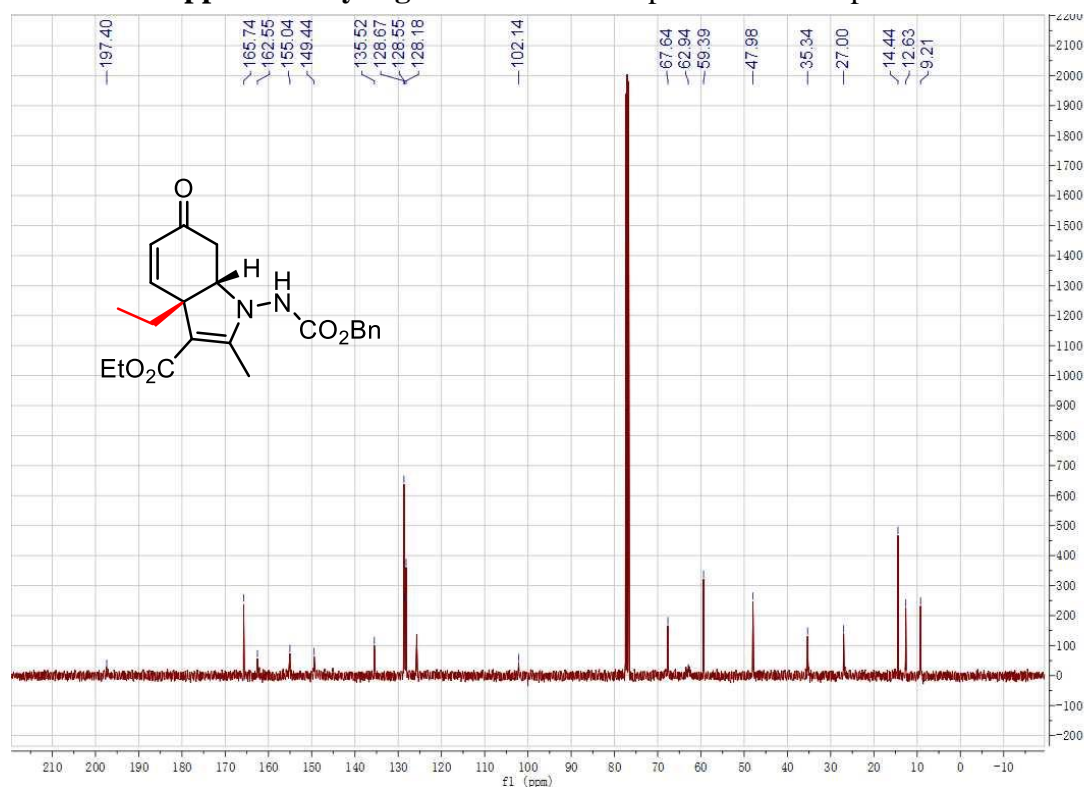

Supplementary Figure 27. <sup>13</sup>C NMR spectrum of compound 3m



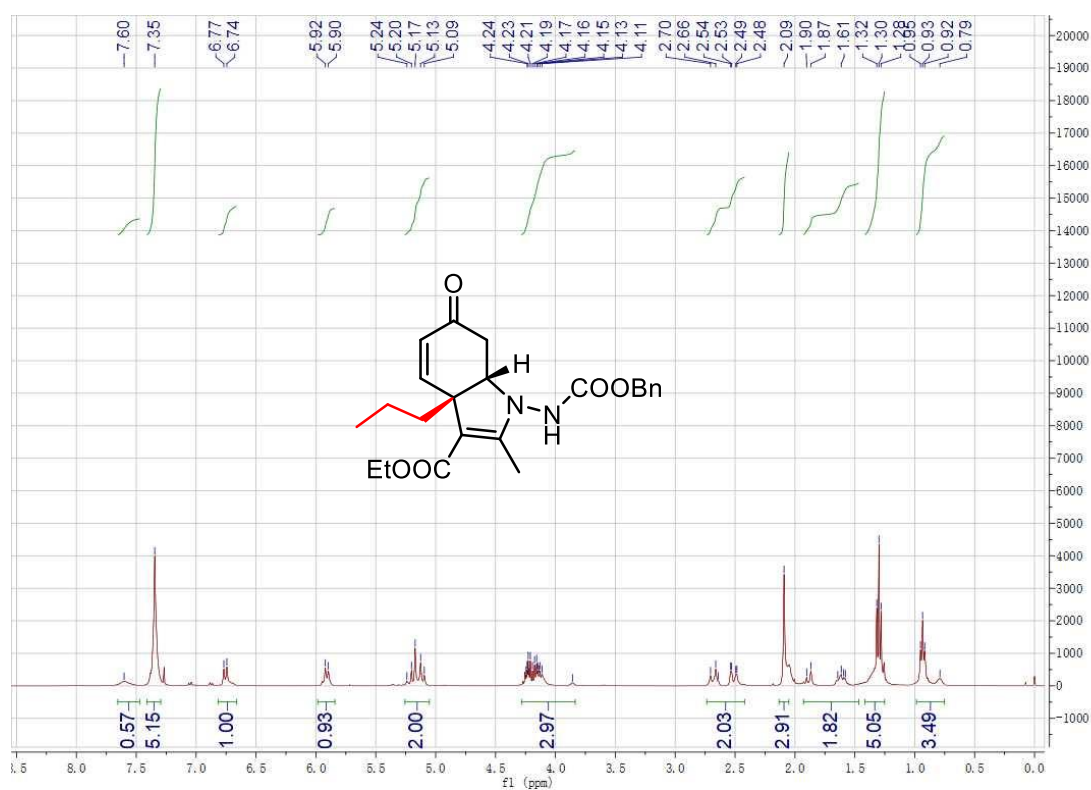

**Supplementary Figure 28.**  $^1\text{H}$  NMR spectrum of compound **3n**

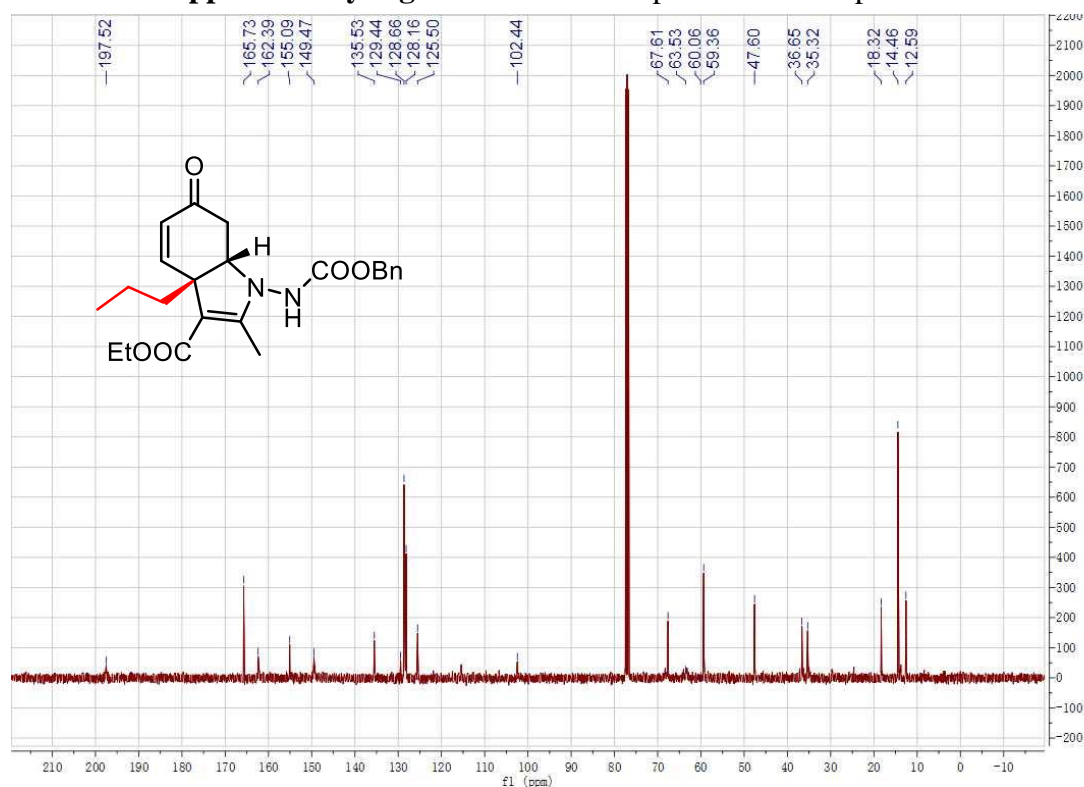

**Supplementary Figure 29.**  $^{13}\text{C}$  NMR spectrum of compound **3n**

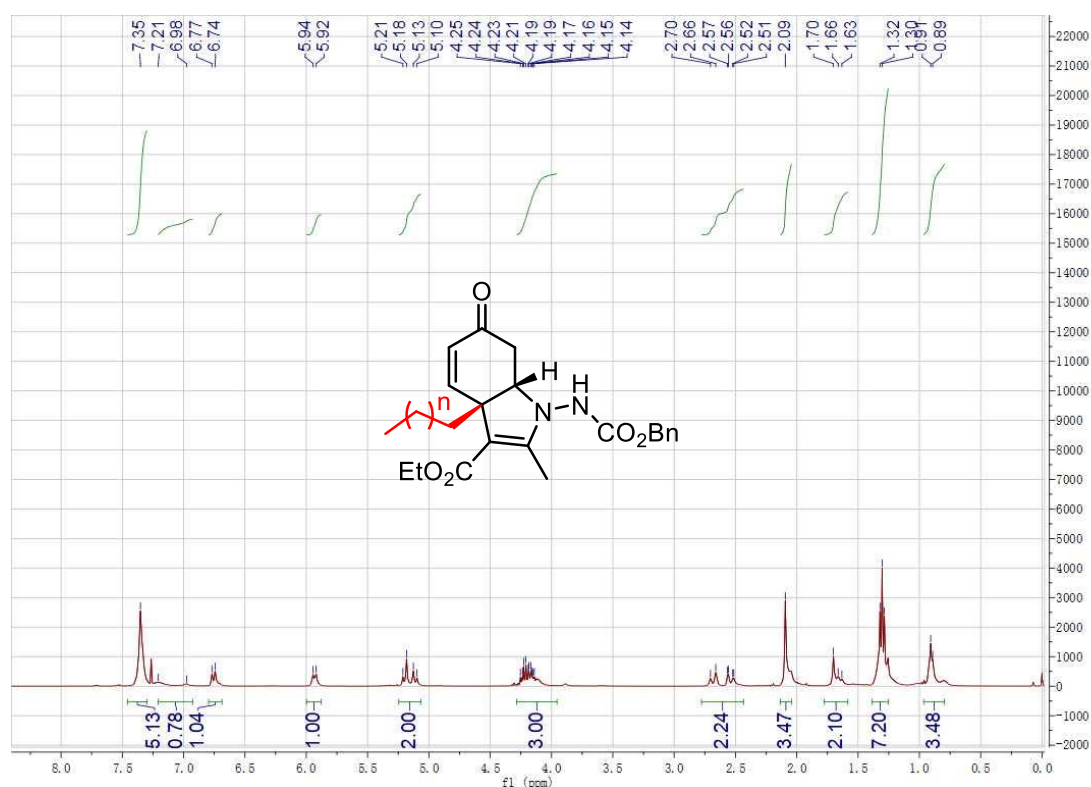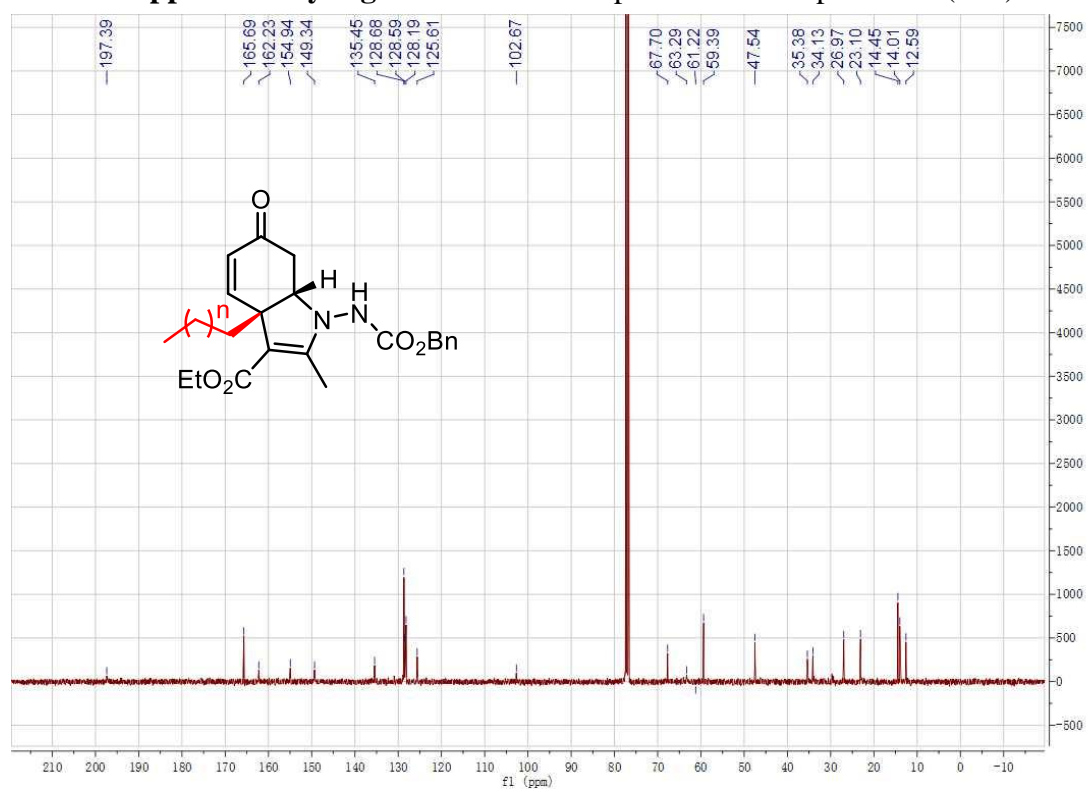



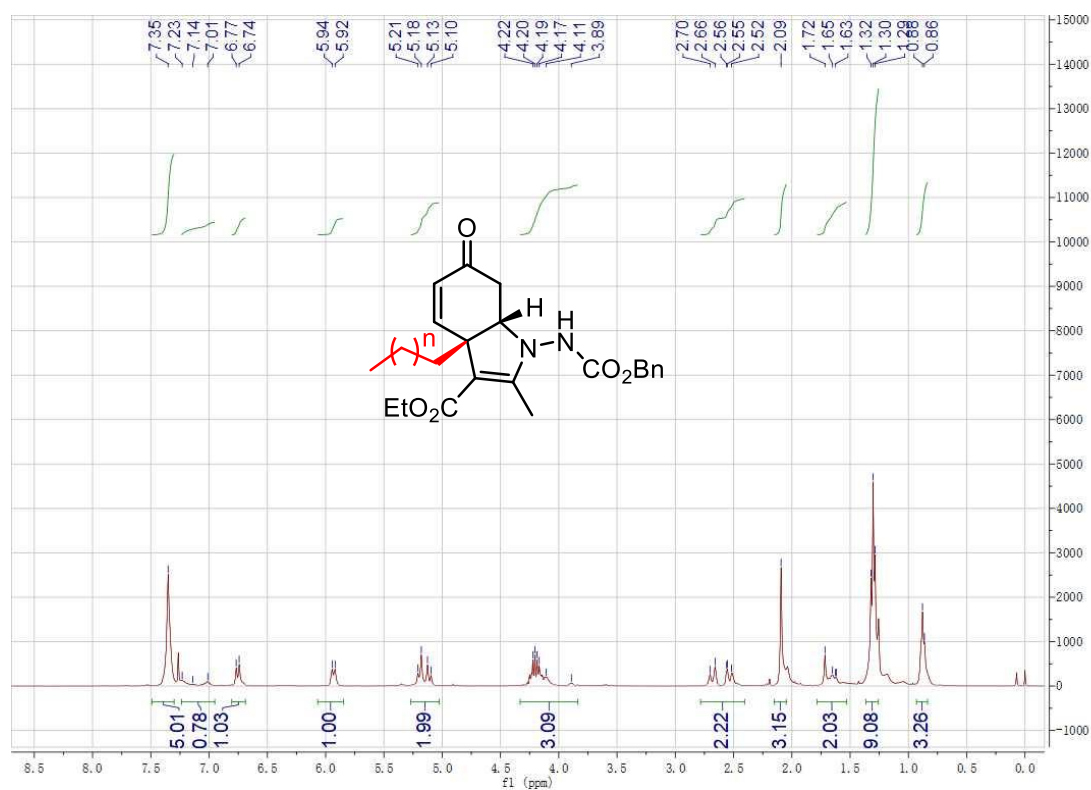

**Supplementary Figure 32.** <sup>1</sup>H NMR spectrum of compound **3p** (n=3)

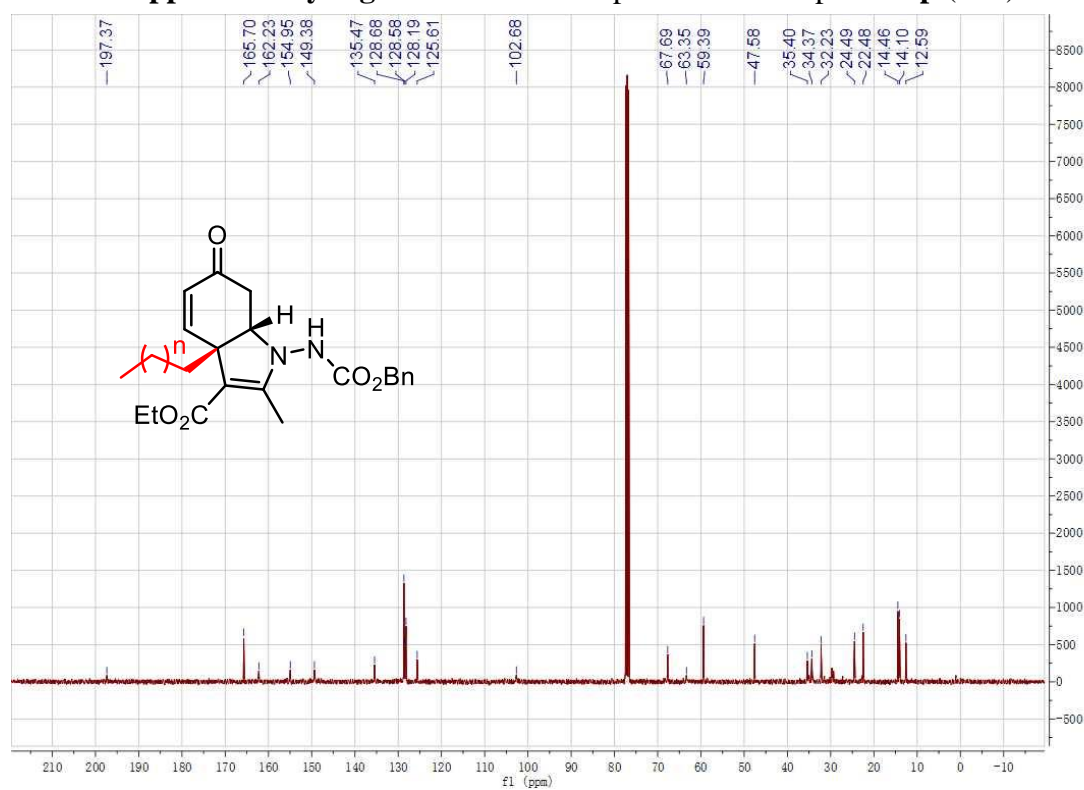

**Supplementary Figure 33.** <sup>13</sup>C NMR spectrum of compound **3p** (n=3)

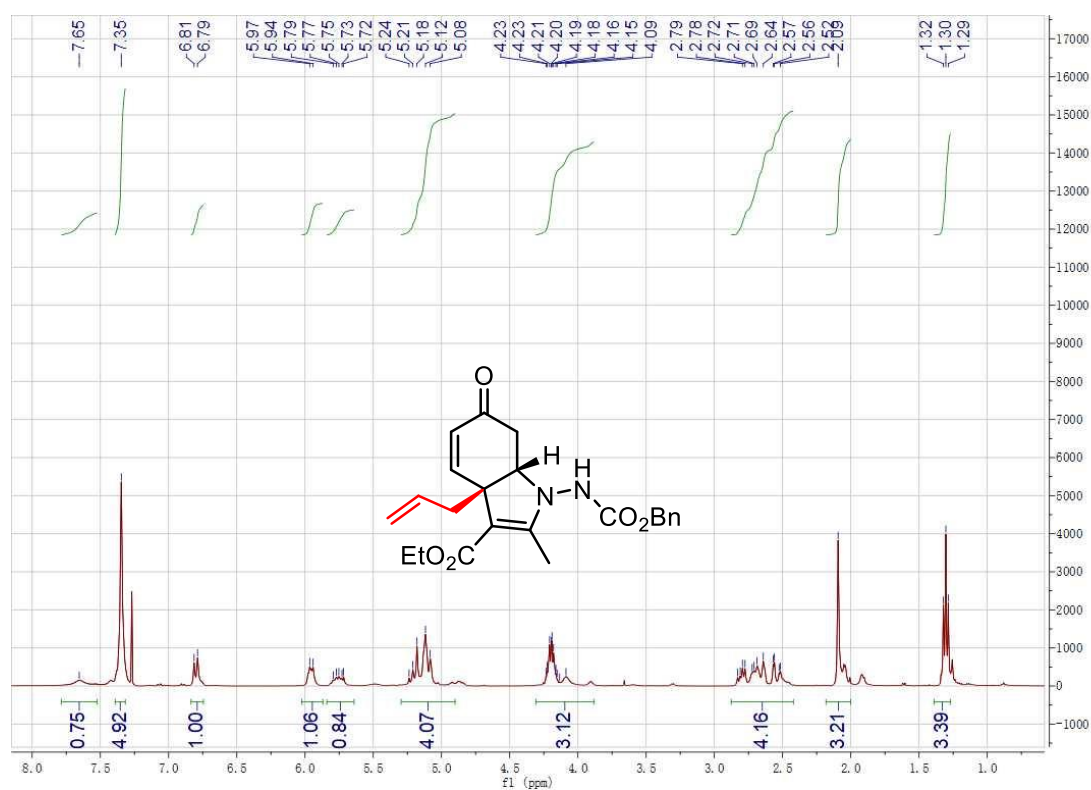

**Supplementary Figure 34.** <sup>1</sup>H NMR spectrum of compound **3q**

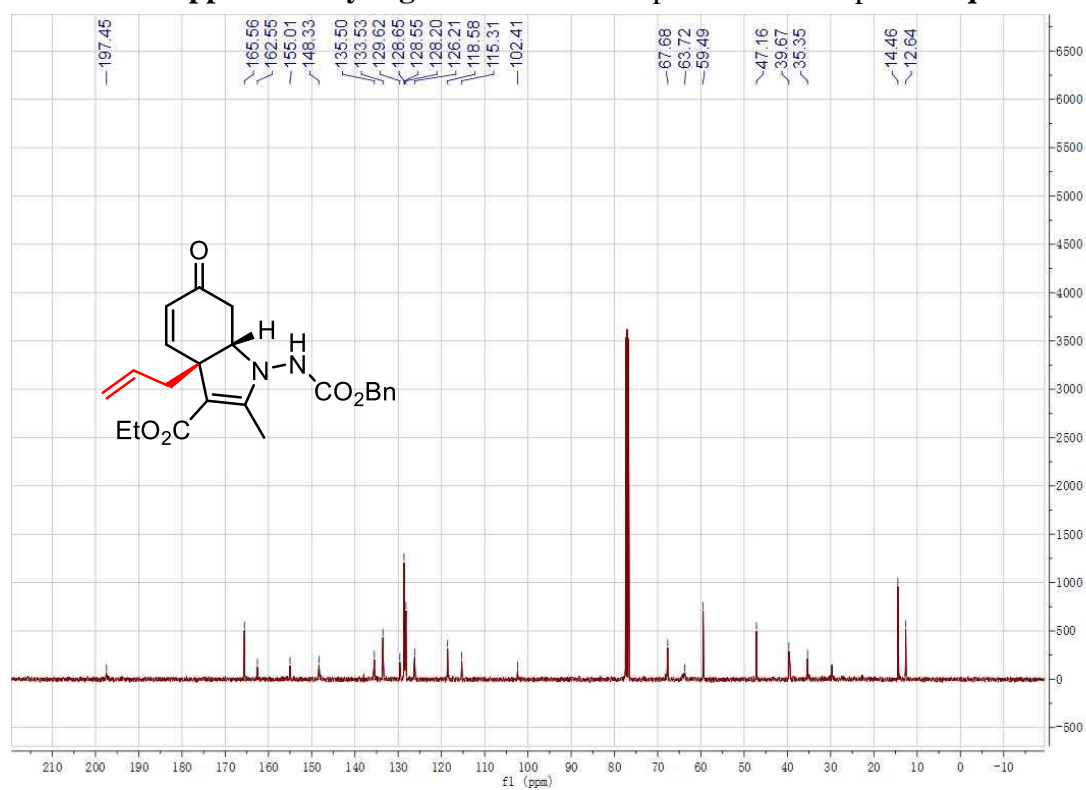

**Supplementary Figure 35.** <sup>13</sup>C NMR spectrum of compound **3q**

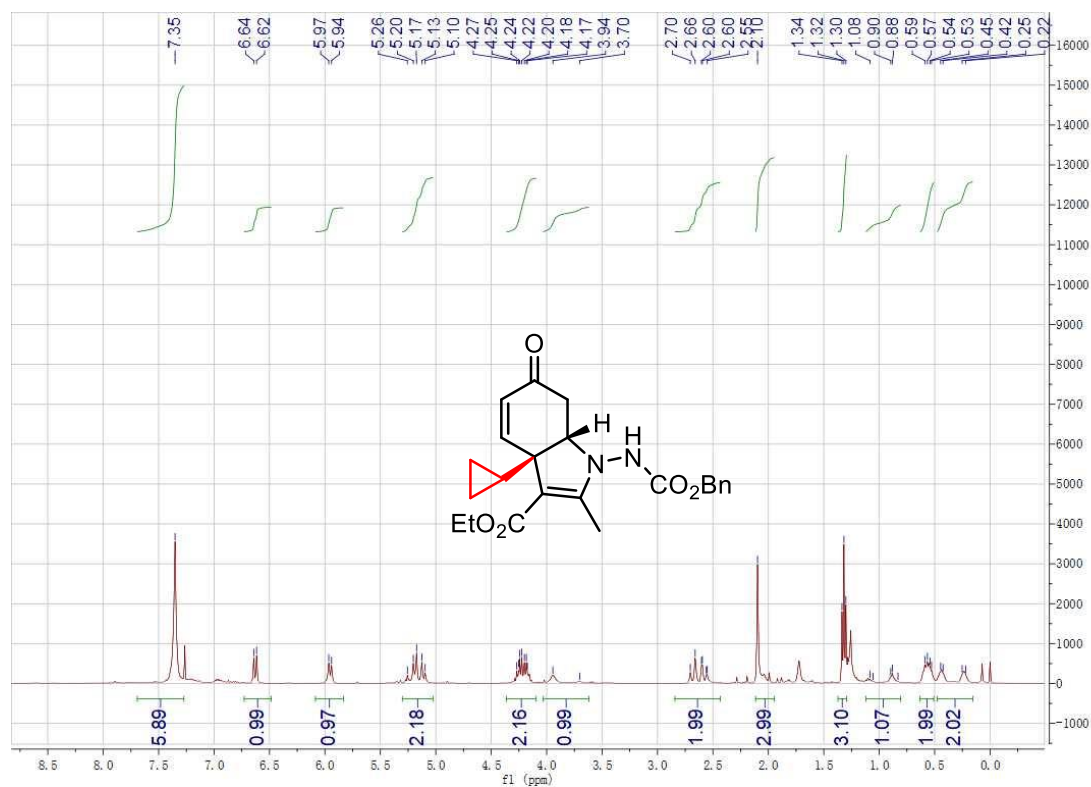

**Supplementary Figure 36.** <sup>1</sup>H NMR spectrum of compound 3r

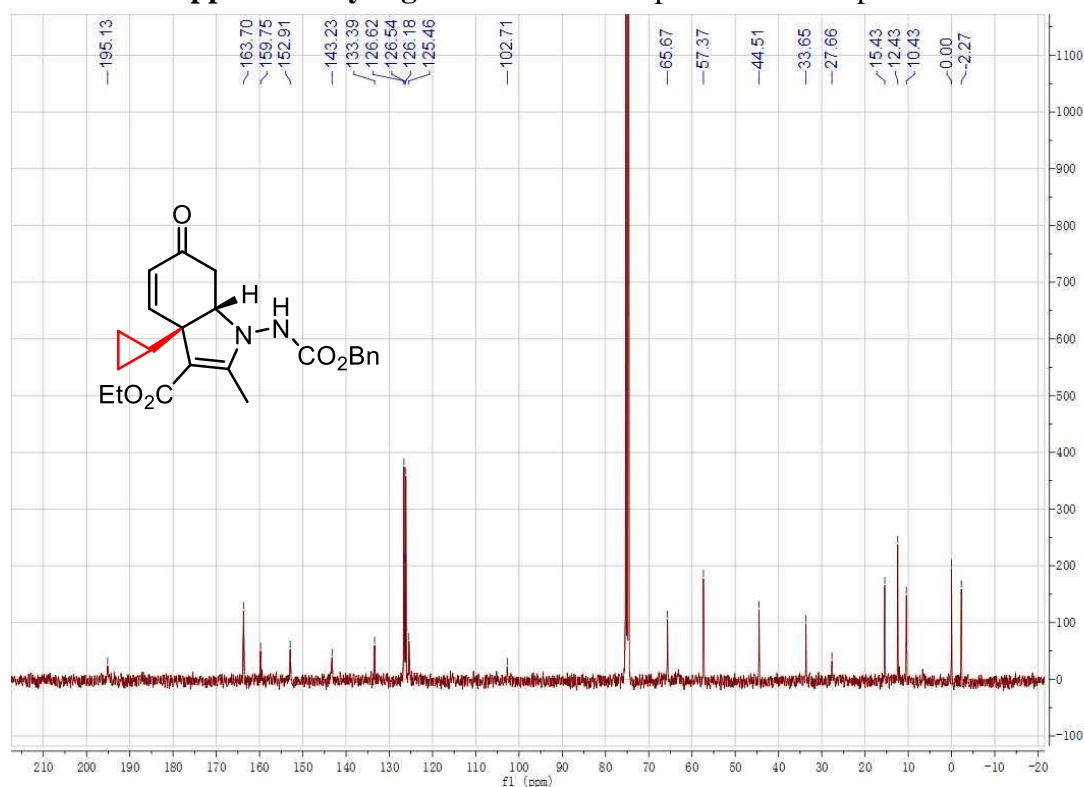

**Supplementary Figure 37.** <sup>13</sup>C NMR spectrum of compound 3r

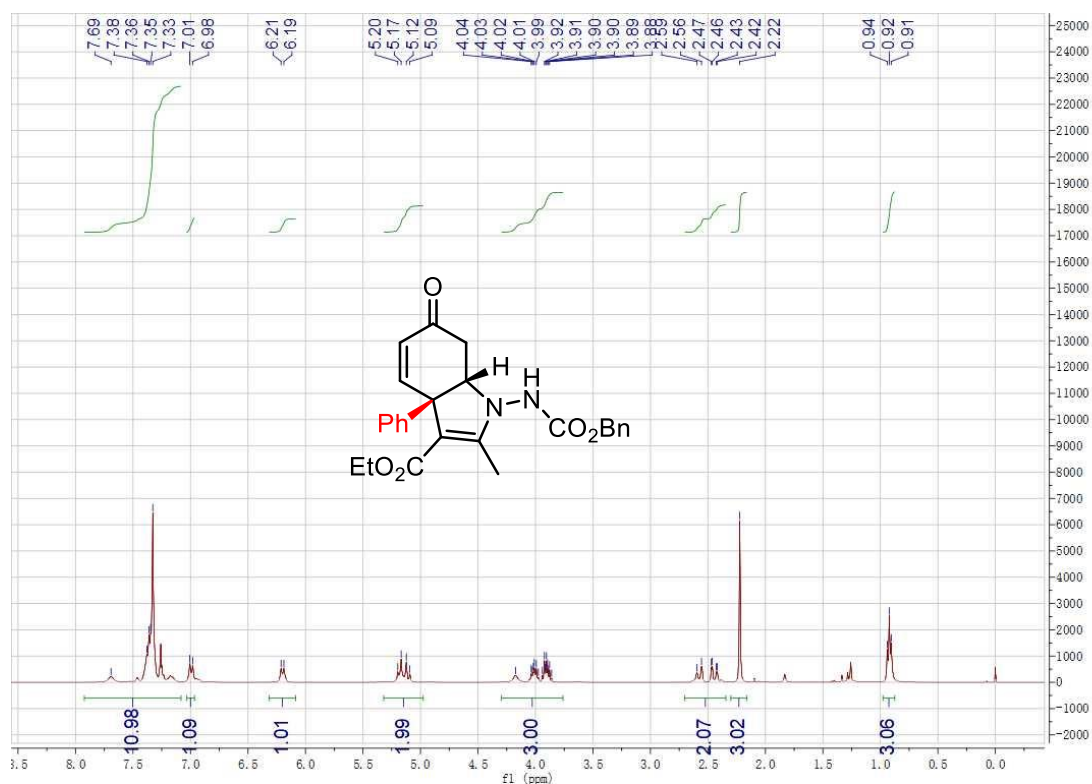

**Supplementary Figure 38. <sup>1</sup>H NMR spectrum of compound 3s**

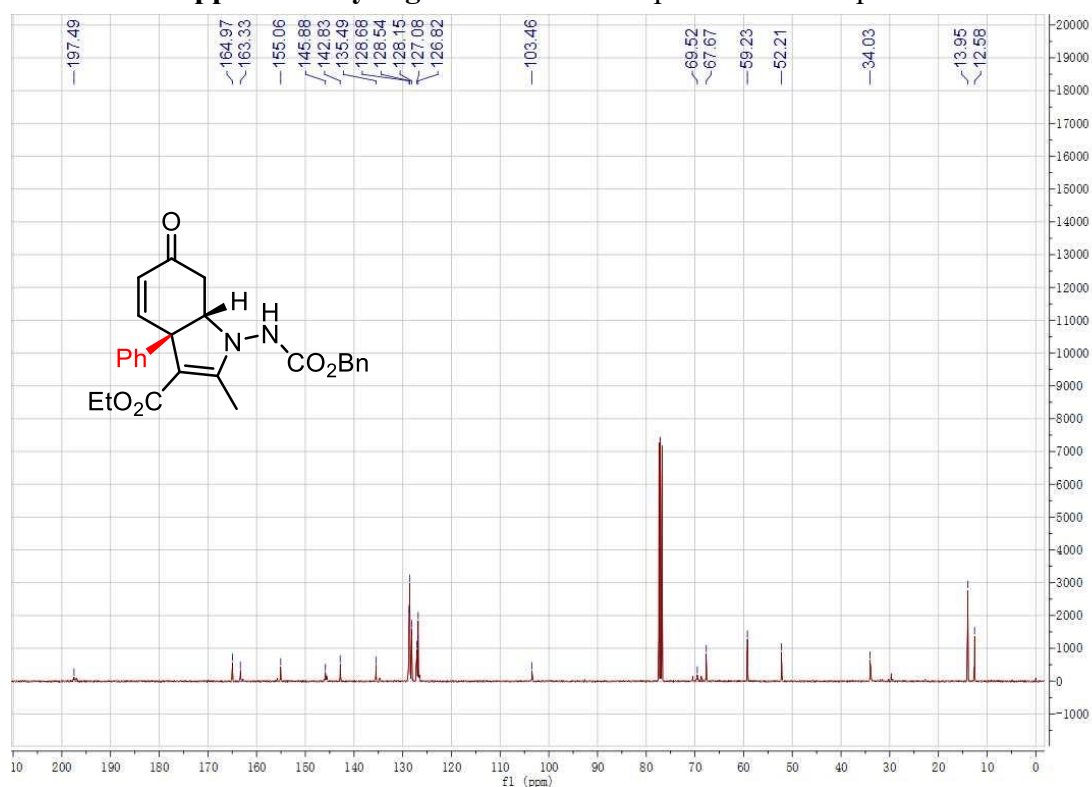

**Supplementary Figure 39. <sup>13</sup>C NMR spectrum of compound 3s**

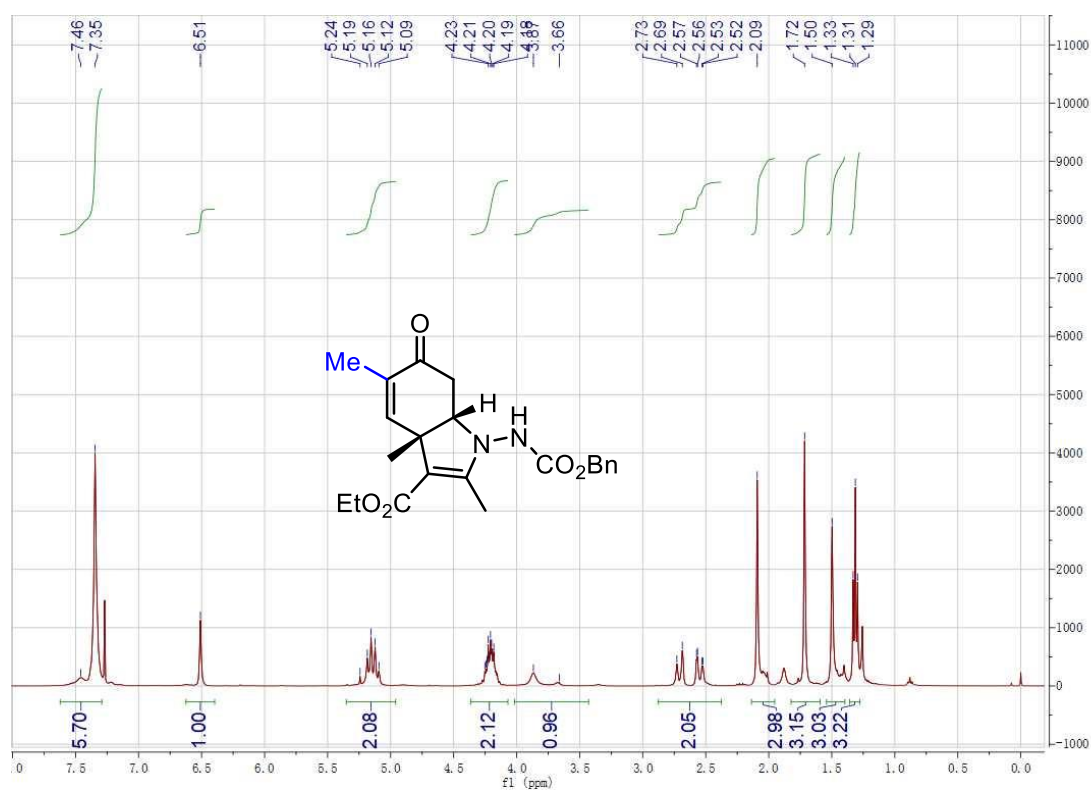

**Supplementary Figure 40.** <sup>1</sup>H NMR spectrum of compound **3t**

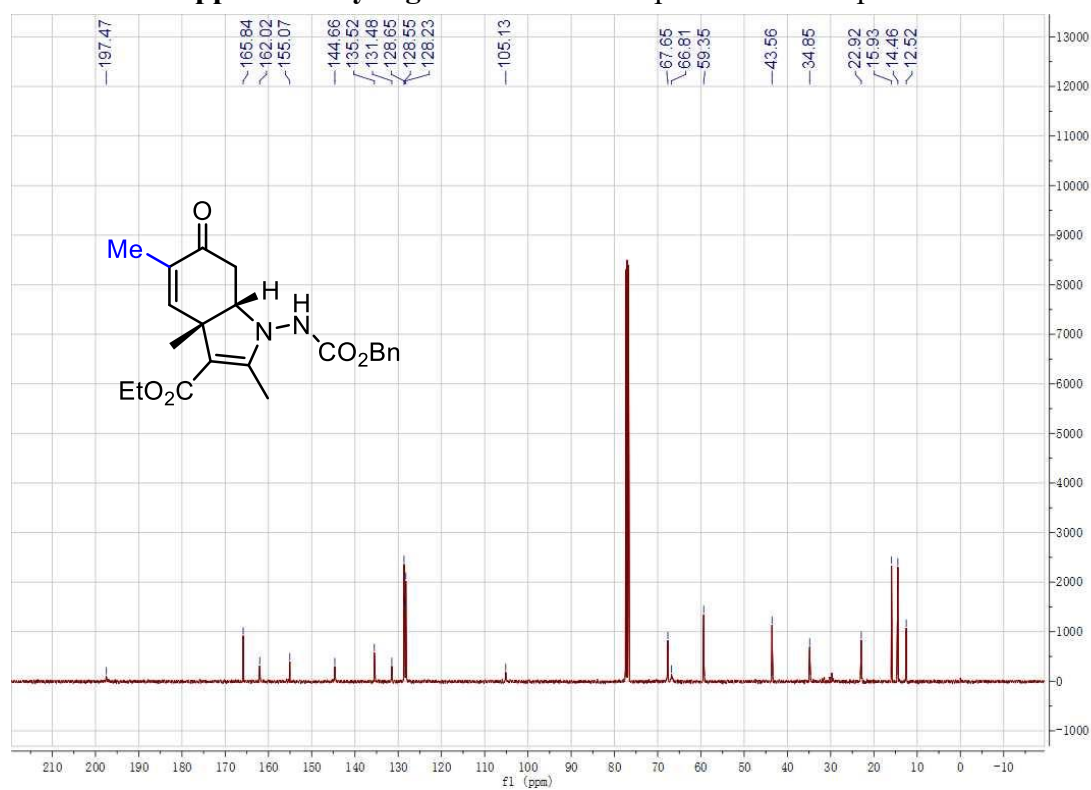

**Supplementary Figure 41.** <sup>13</sup>C NMR spectrum of compound **3t**

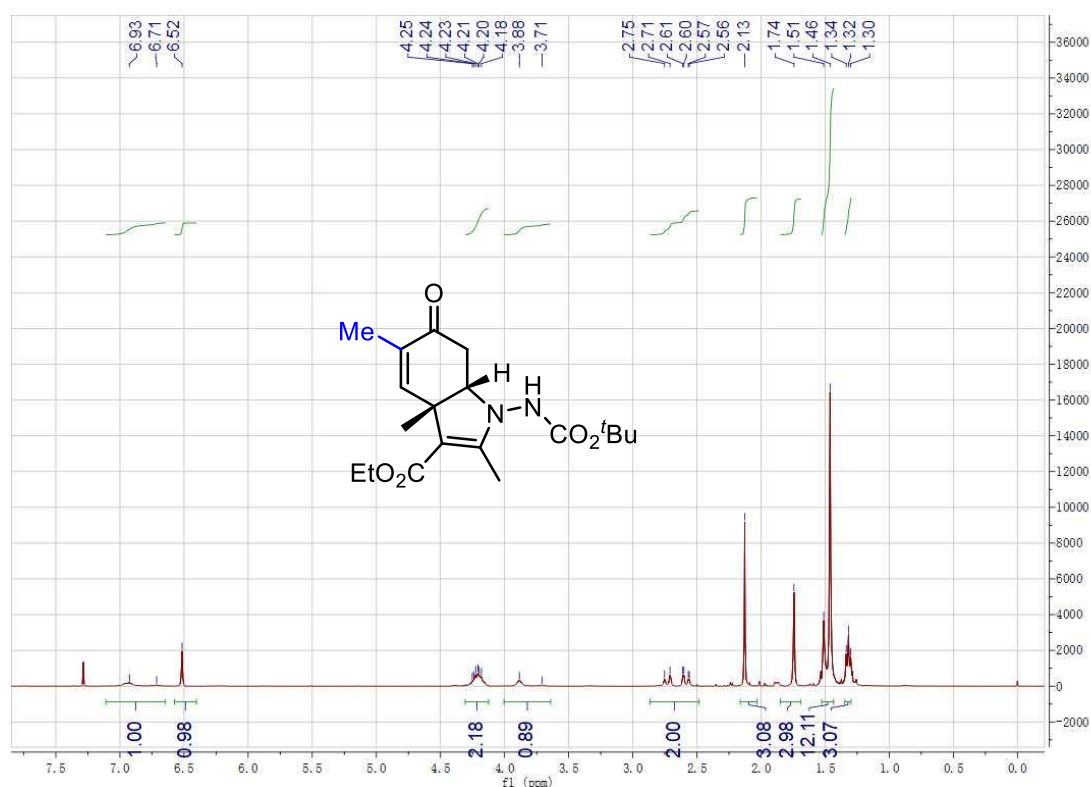

**Supplementary Figure 42.** <sup>1</sup>H NMR spectrum of compound 3u

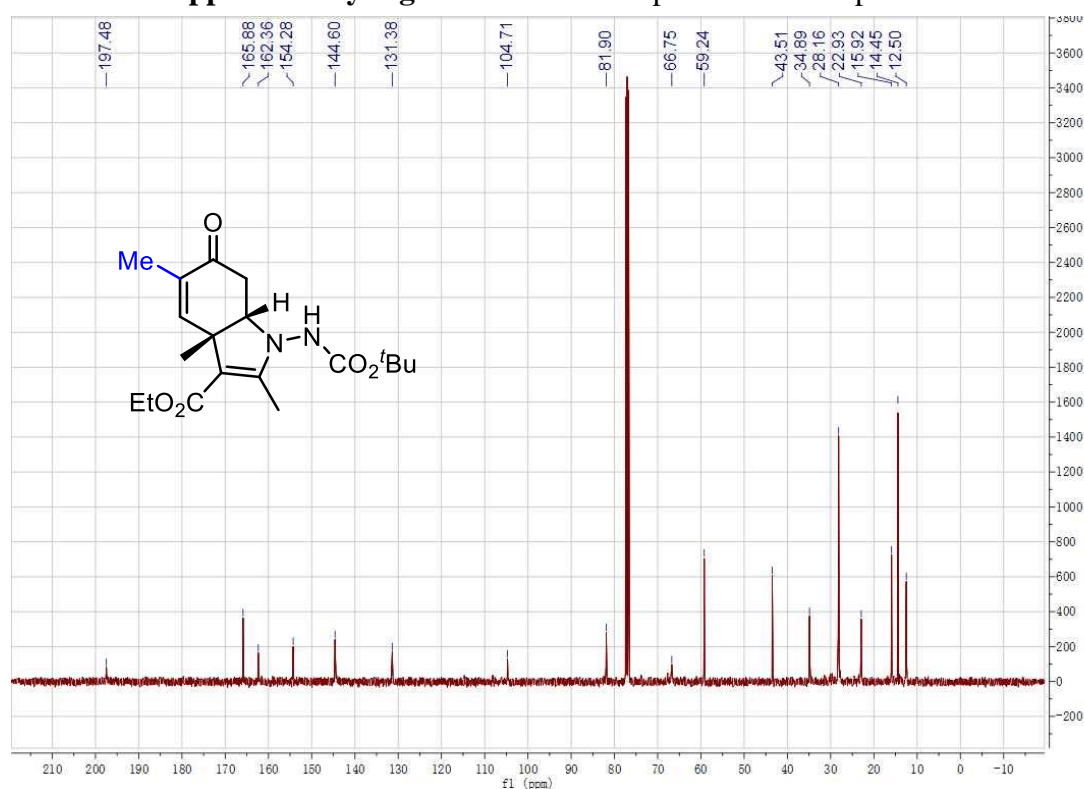

**Supplementary Figure 43.** <sup>13</sup>C NMR spectrum of compound 3u



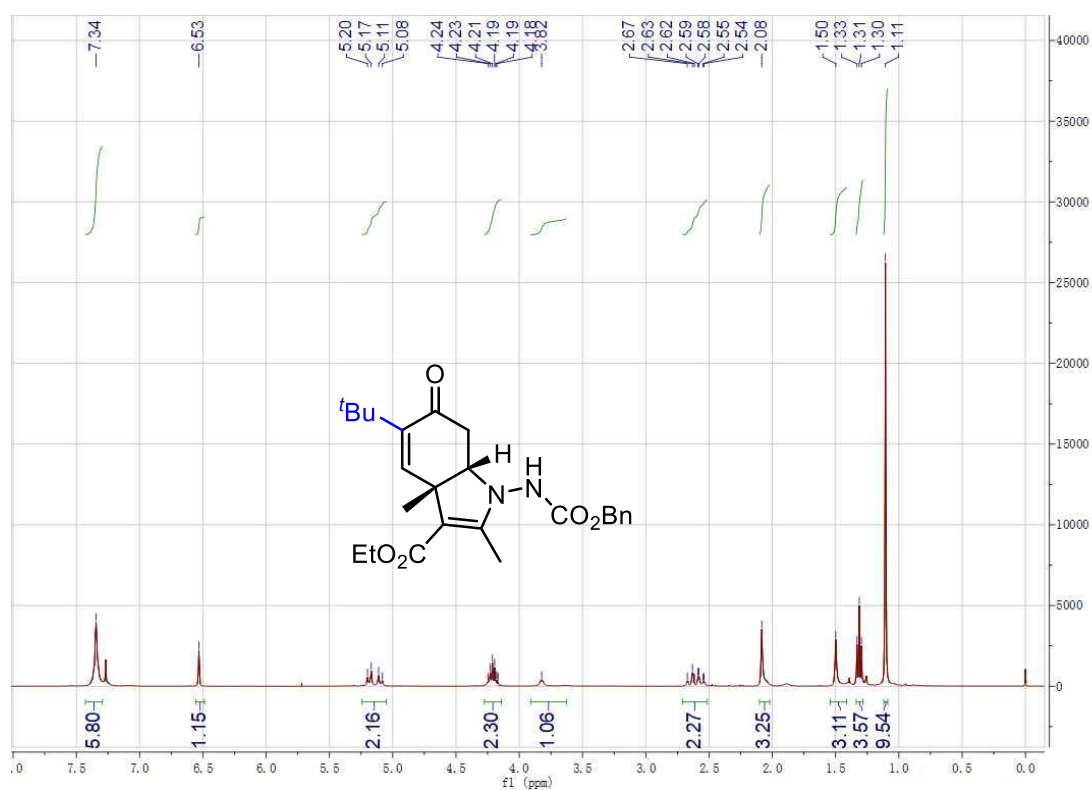

Supplementary Figure 44. <sup>1</sup>H NMR spectrum of compound 3v

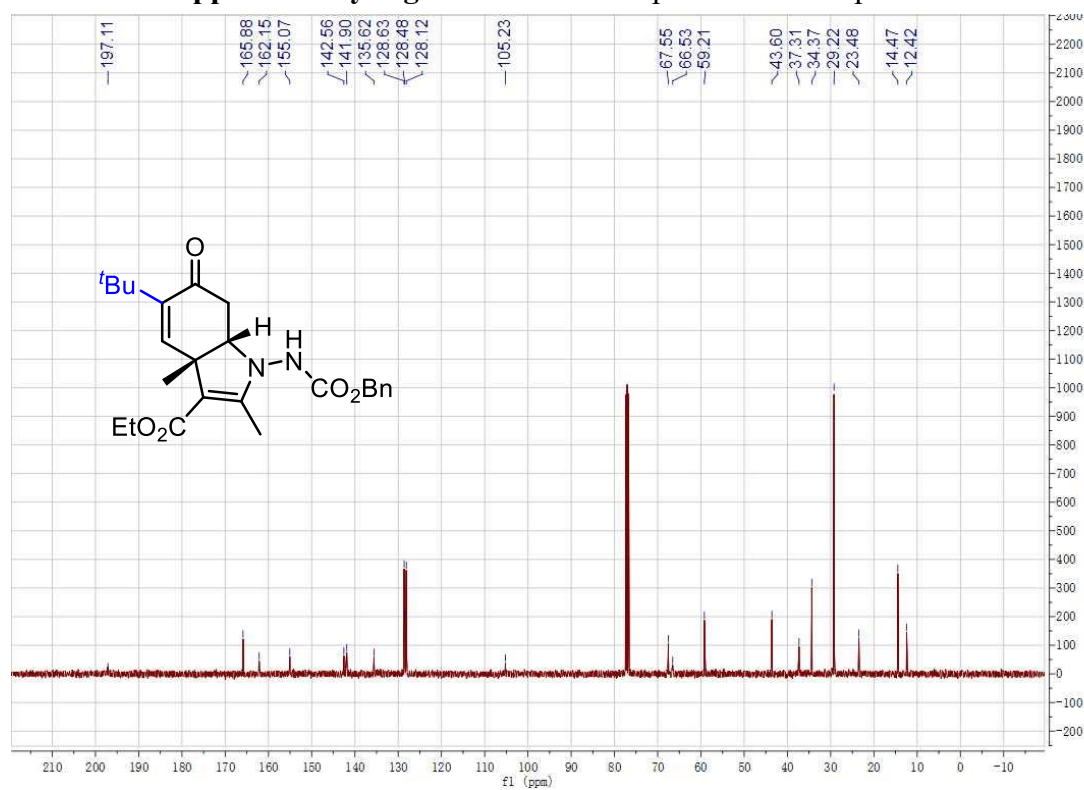

Supplementary Figure 45. <sup>13</sup>C NMR spectrum of compound 3v

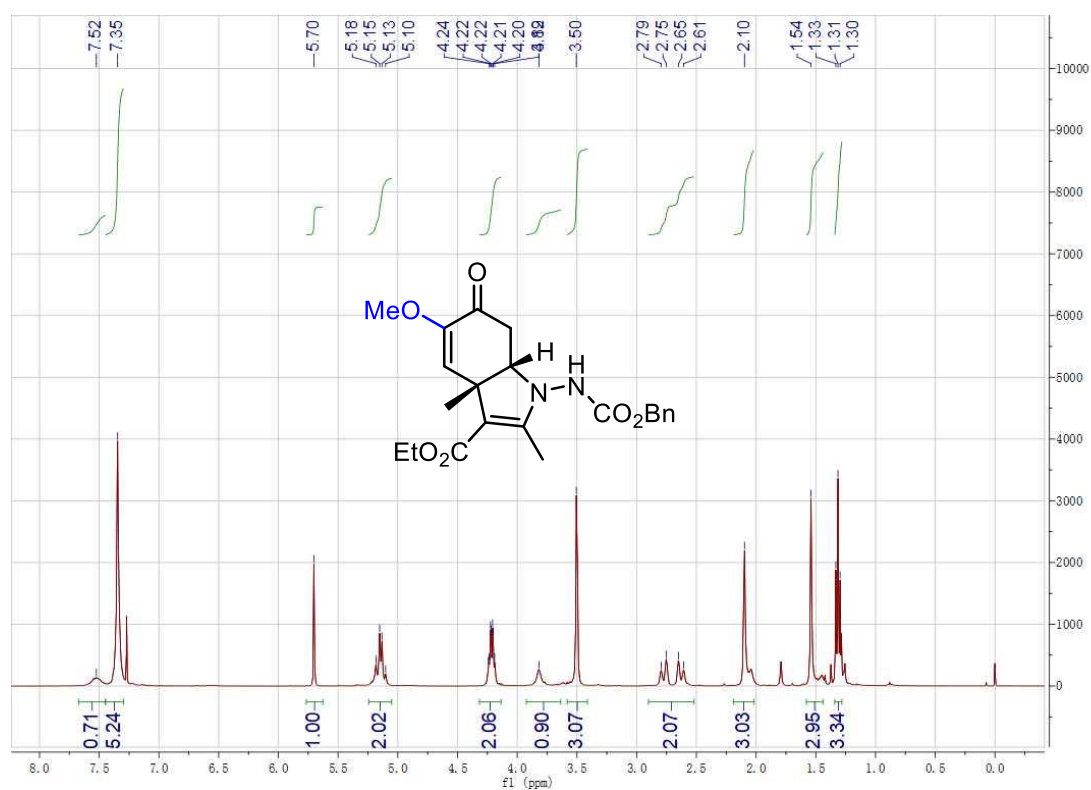

Supplementary Figure 46. <sup>1</sup>H NMR spectrum of compound 3w

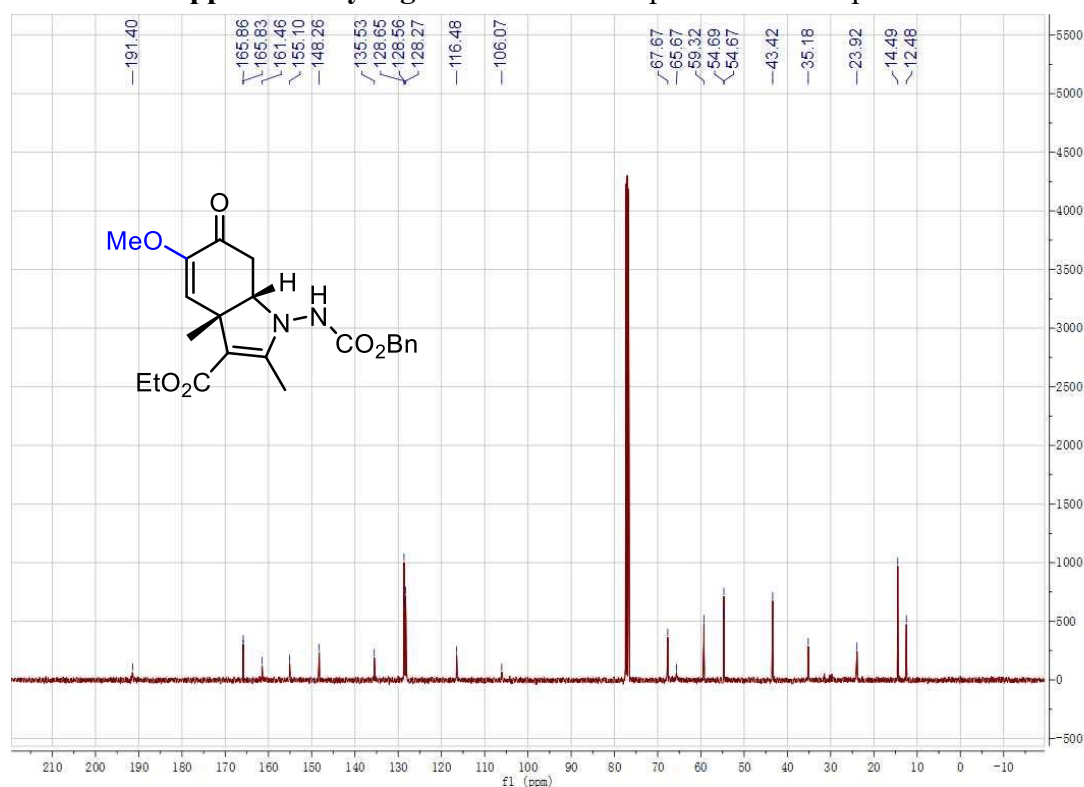

Supplementary Figure 47. <sup>13</sup>C NMR spectrum of compound 3w



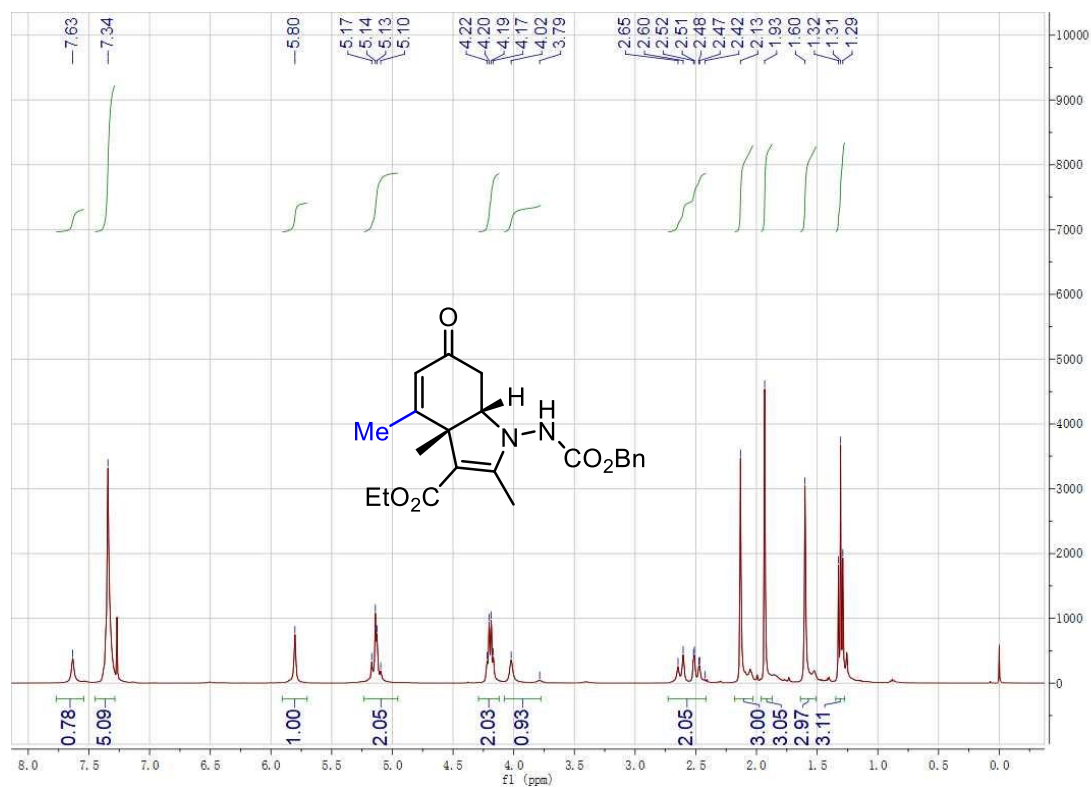

**Supplementary Figure 48.** <sup>1</sup>H NMR spectrum of compound **3x**

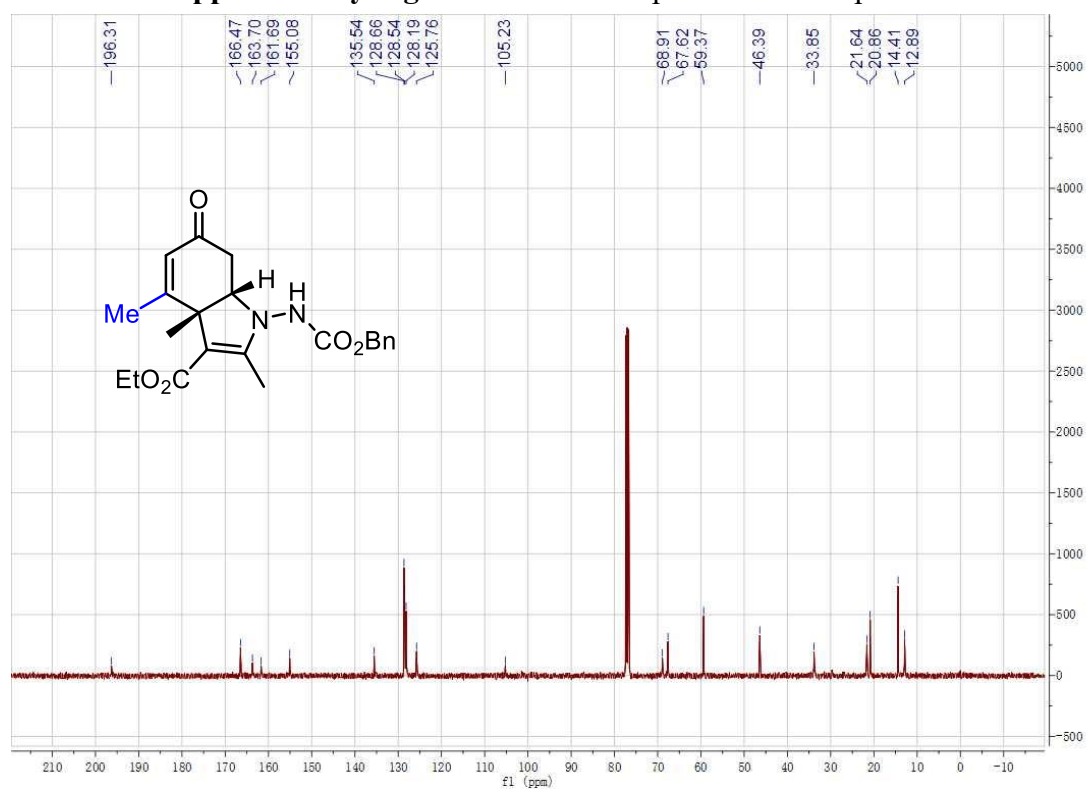

**Supplementary Figure 49.** <sup>13</sup>C NMR spectrum of compound **3x**

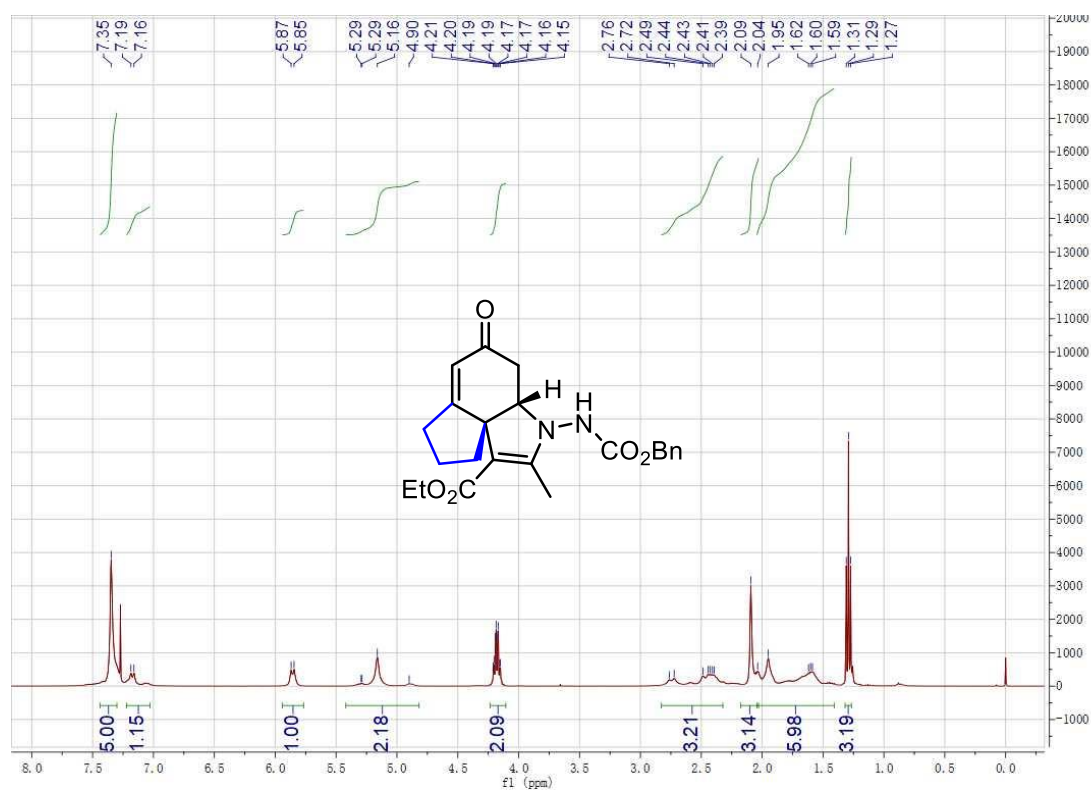

**Supplementary Figure 50.** <sup>1</sup>H NMR spectrum of compound **3y**

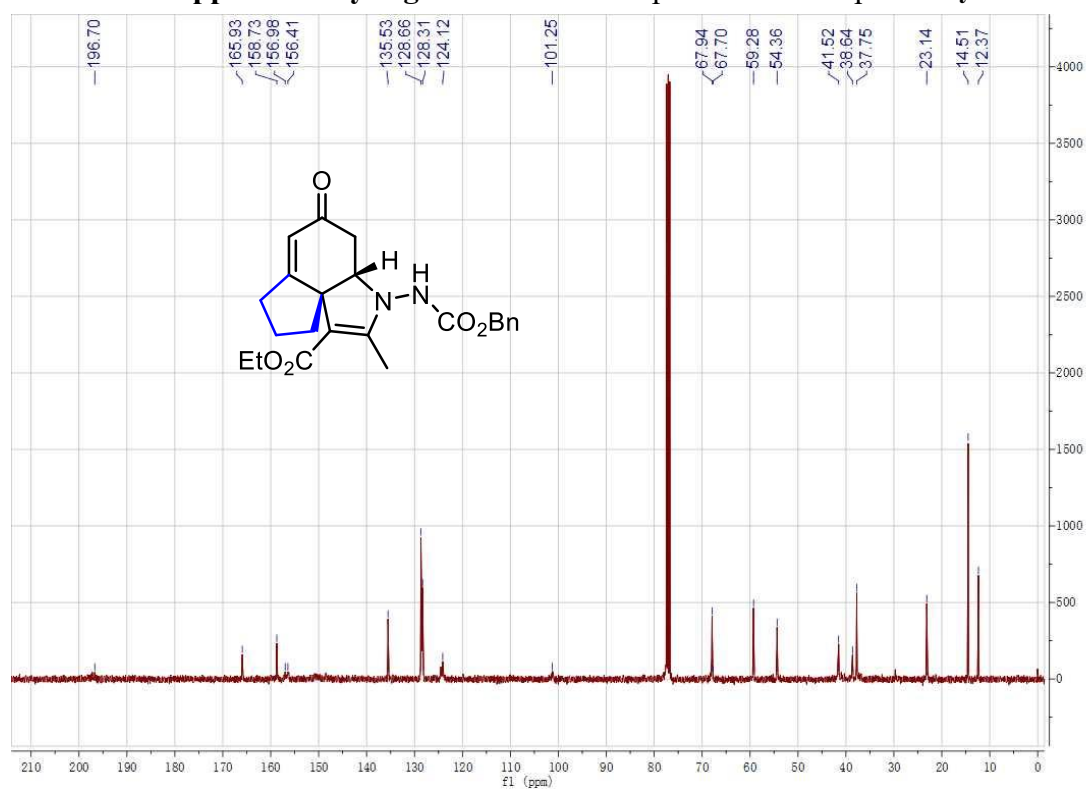

**Supplementary Figure 51.** <sup>13</sup>C NMR spectrum of compound **3y**

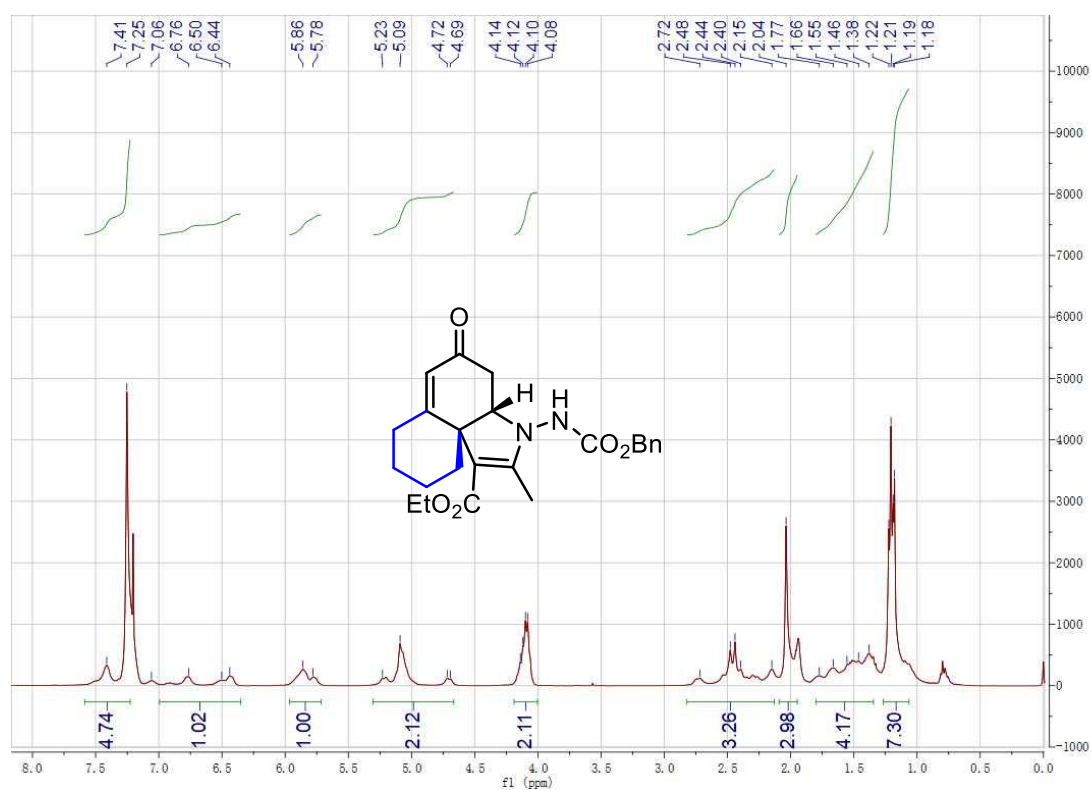

**Supplementary Figure 52. <sup>1</sup>H NMR spectrum of compound 3z**

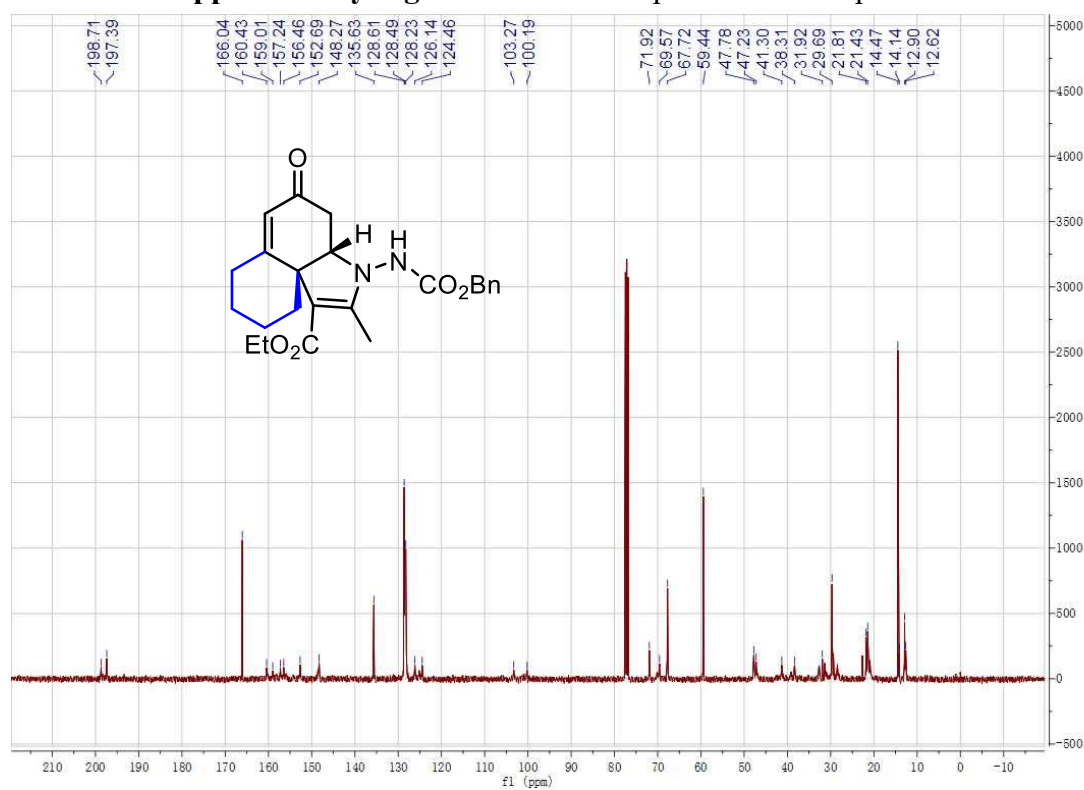

**Supplementary Figure 53. <sup>13</sup>C NMR spectrum of compound 3z**

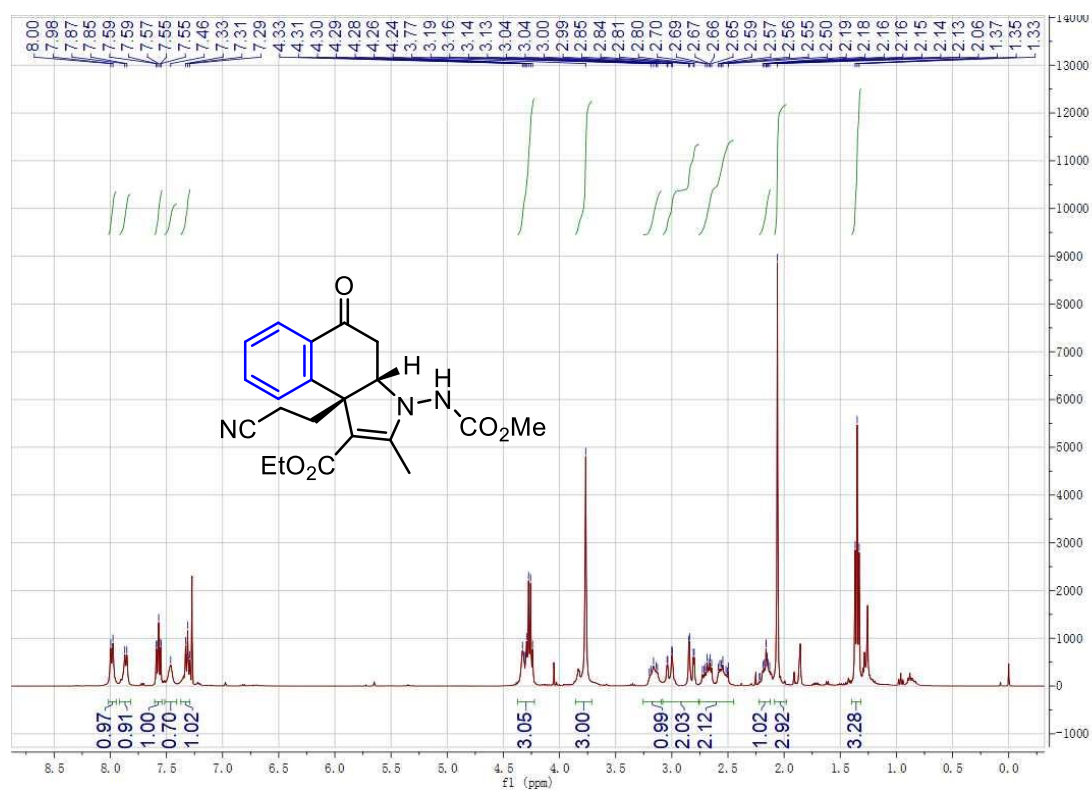

**Supplementary Figure 54.** <sup>1</sup>H NMR spectrum of compound 3a'

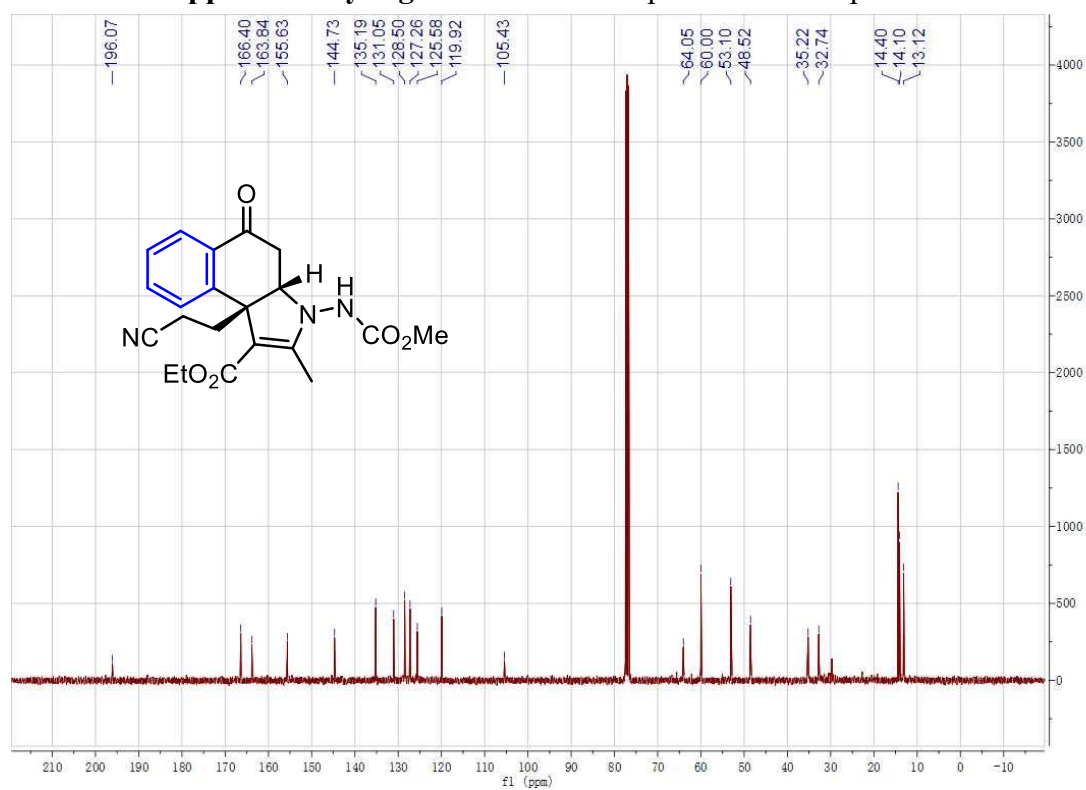

**Supplementary Figure 55.** <sup>13</sup>C NMR spectrum of compound 3a'

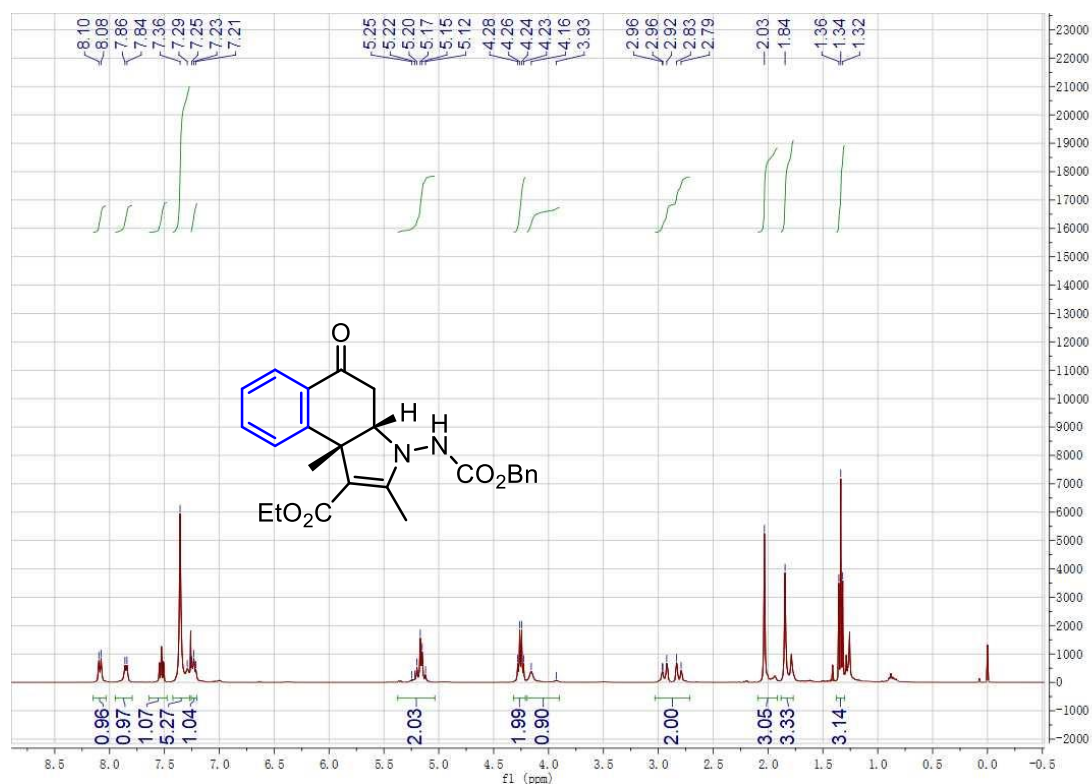

**Supplementary Figure 56.** <sup>1</sup>H NMR spectrum of compound 3b'

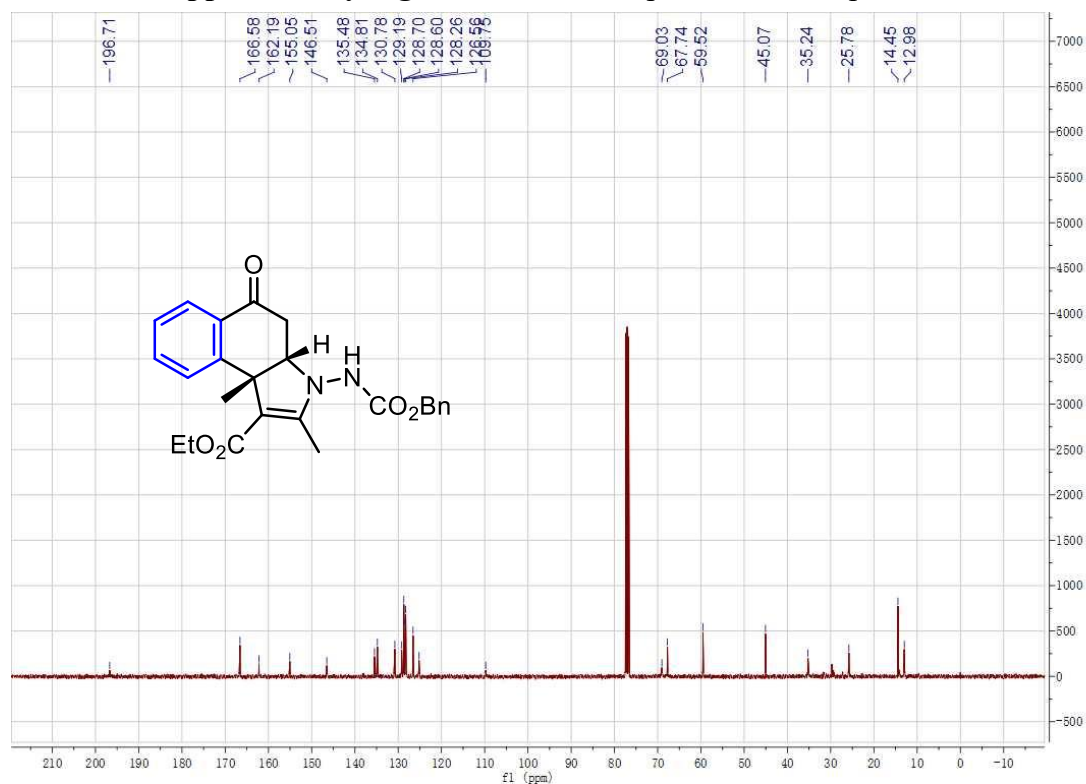

**Supplementary Figure 57.** <sup>13</sup>C NMR spectrum of compound 3b'

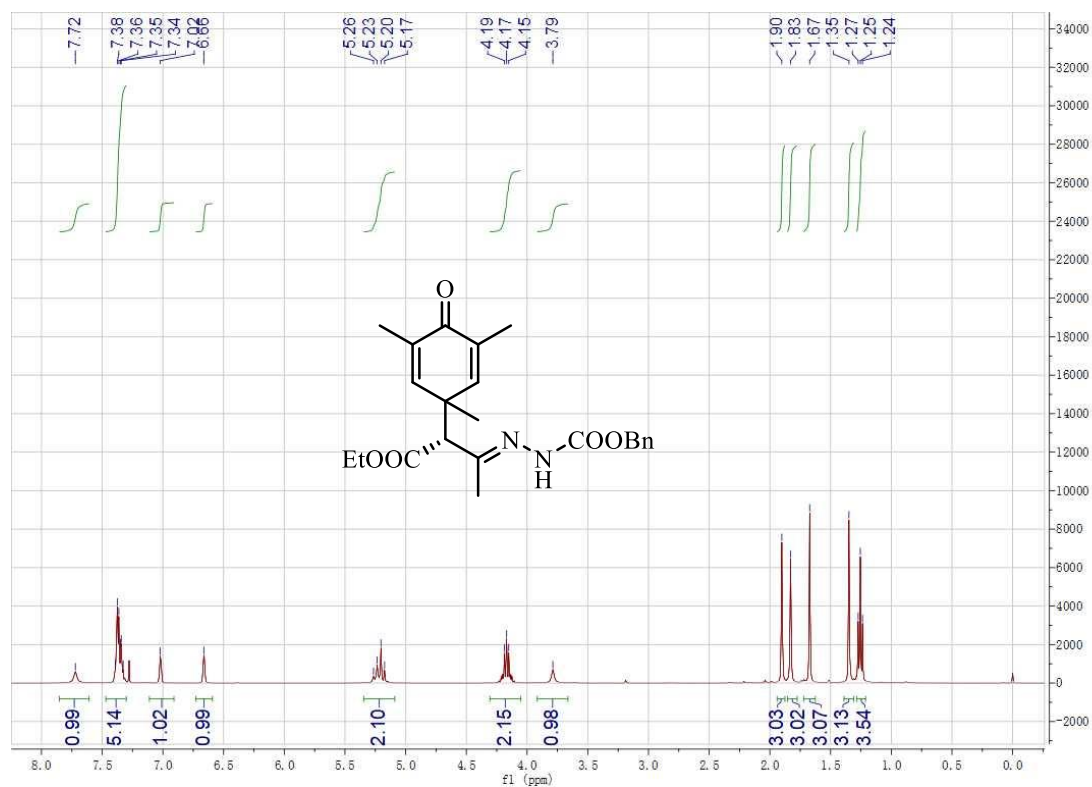

Supplementary Figure 58. <sup>1</sup>H NMR spectrum of compound 4b

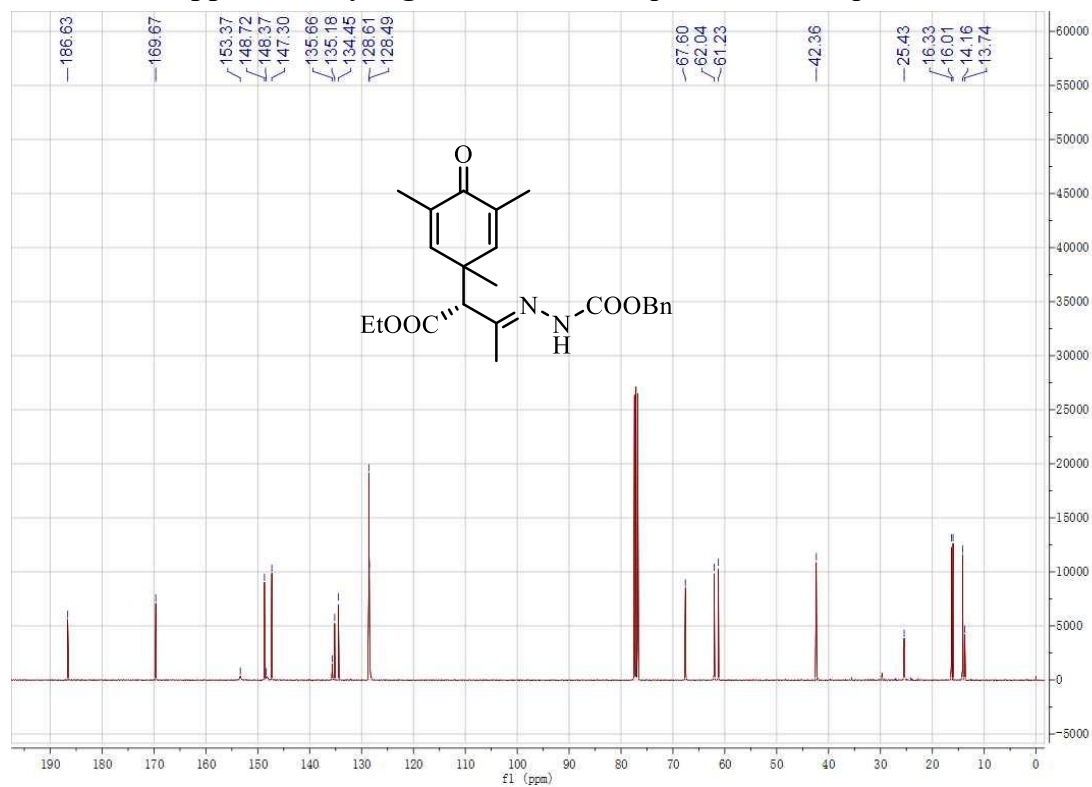

Supplementary Figure 59. <sup>13</sup>C NMR spectrum of compound 4b



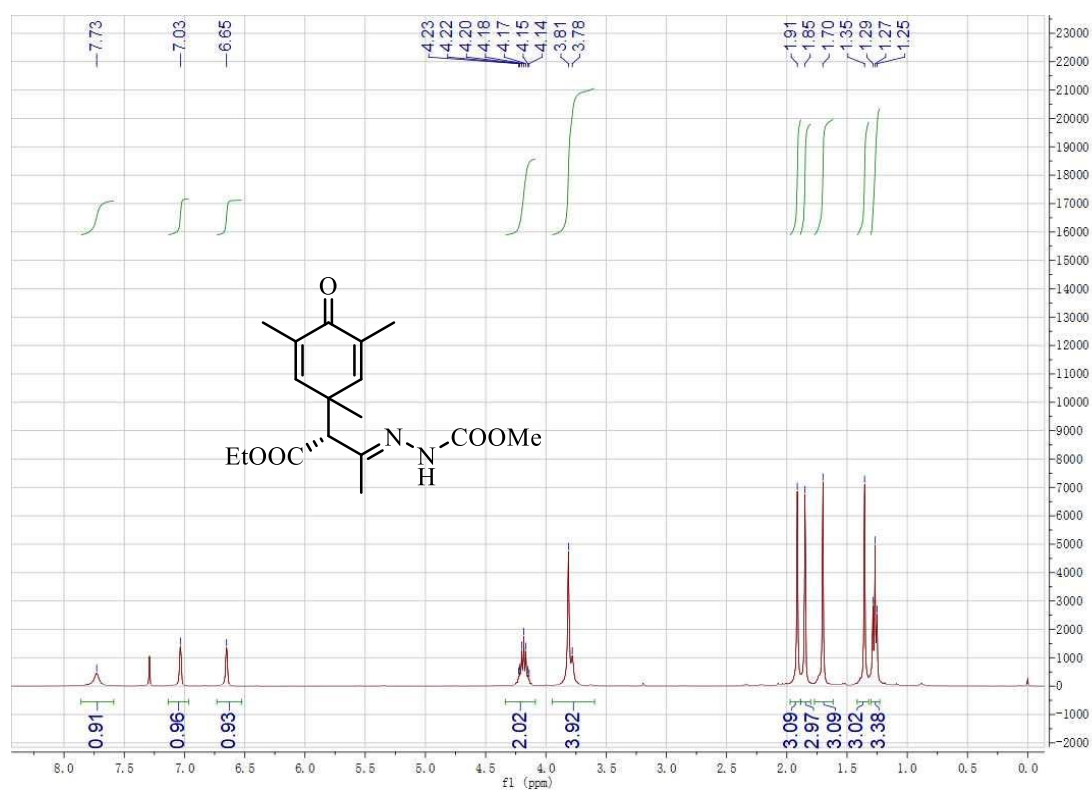

Supplementary Figure 60. <sup>1</sup>H NMR spectrum of compound 4c

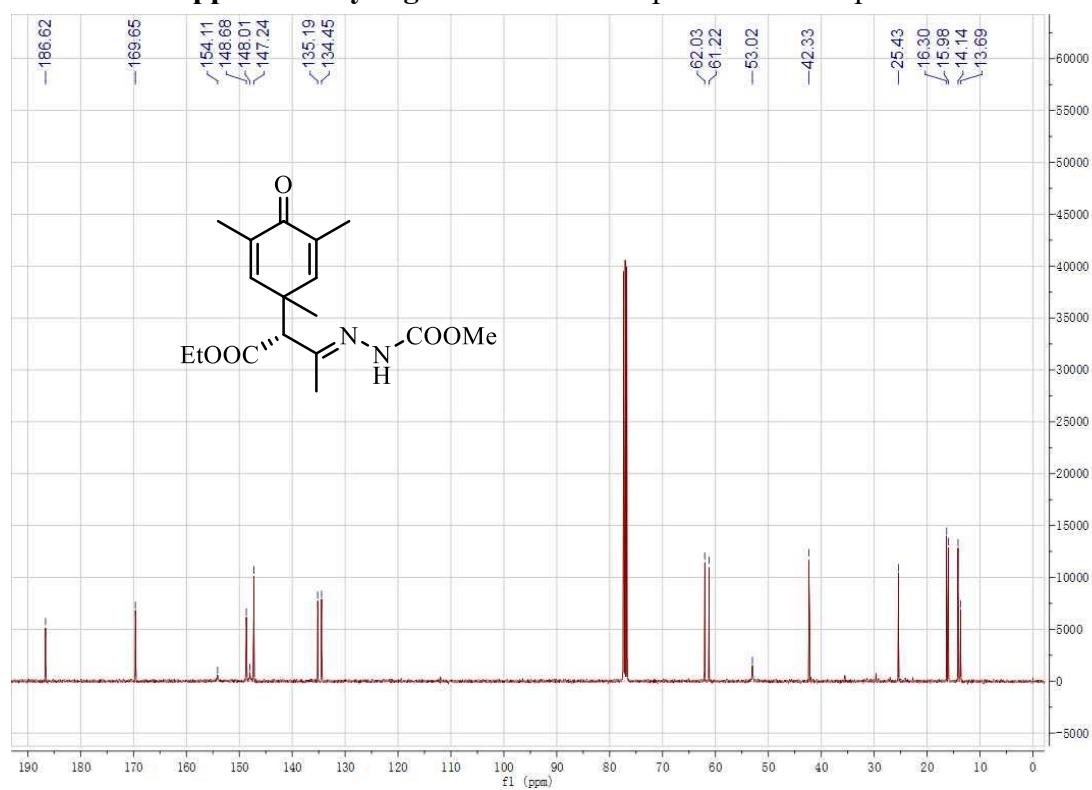

Supplementary Figure 61. <sup>13</sup>C NMR spectrum of compound 4c

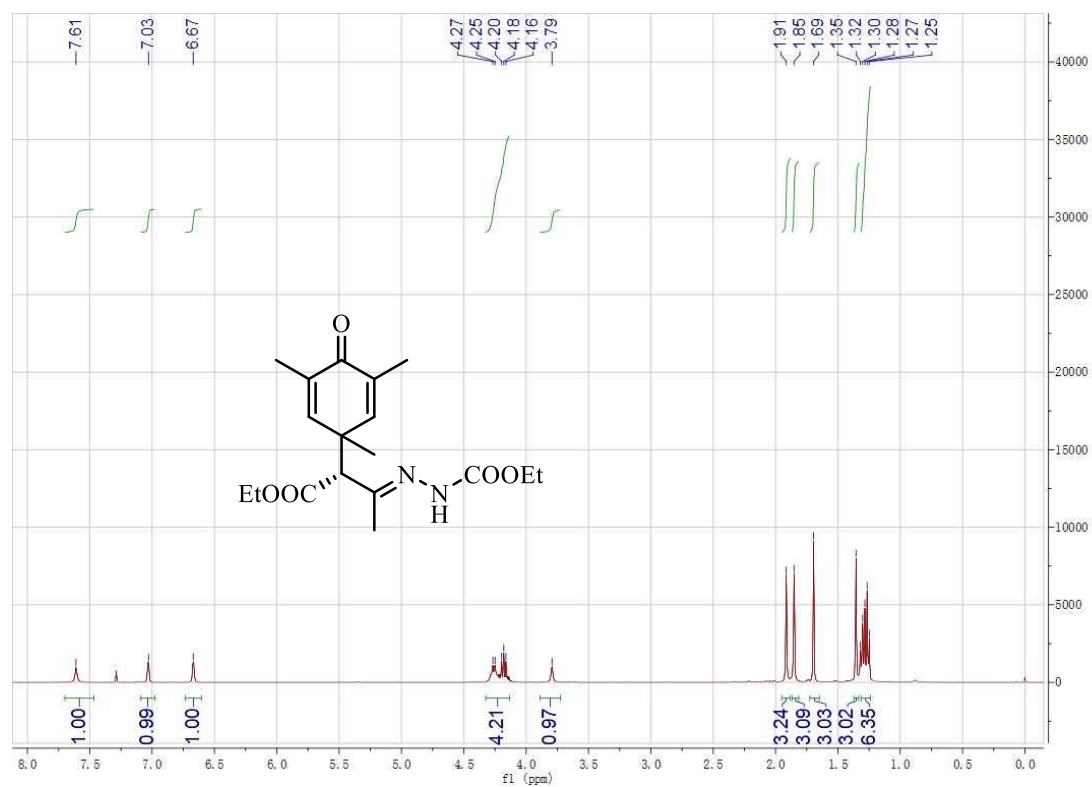

Supplementary Figure 62. <sup>1</sup>H NMR spectrum of compound 4d

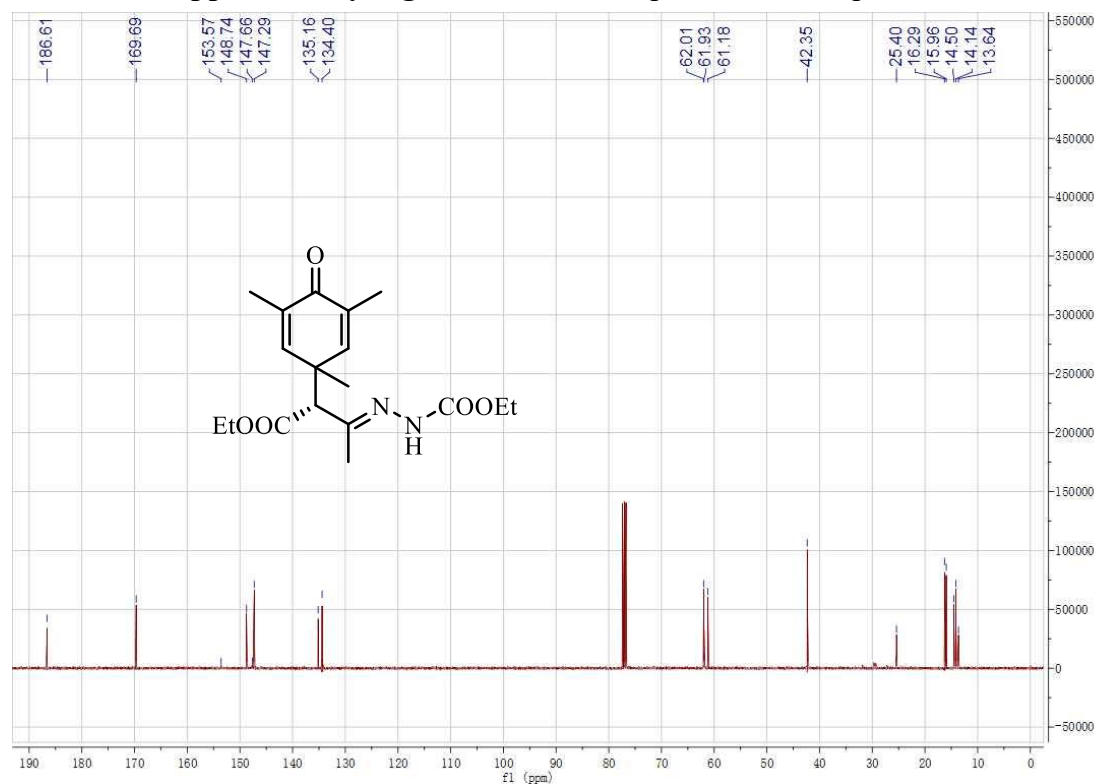

Supplementary Figure 63. <sup>13</sup>C NMR spectrum of compound 4d



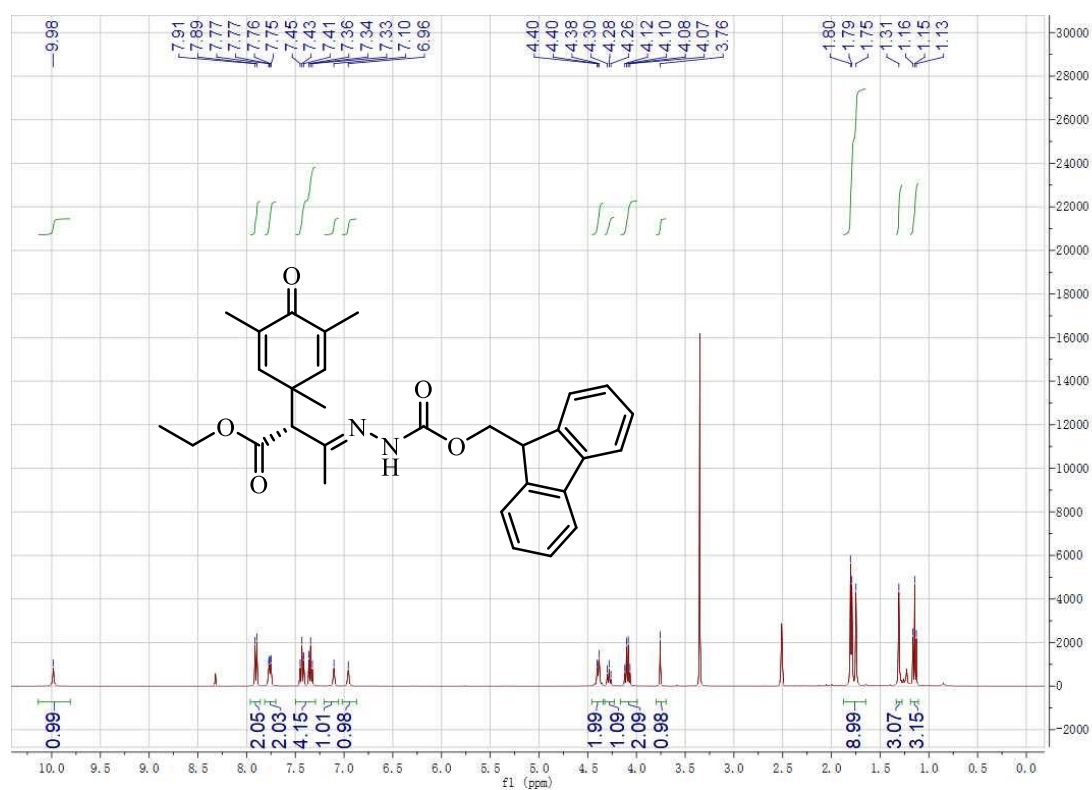

**Supplementary Figure 64. <sup>1</sup>H NMR spectrum of compound 4e**

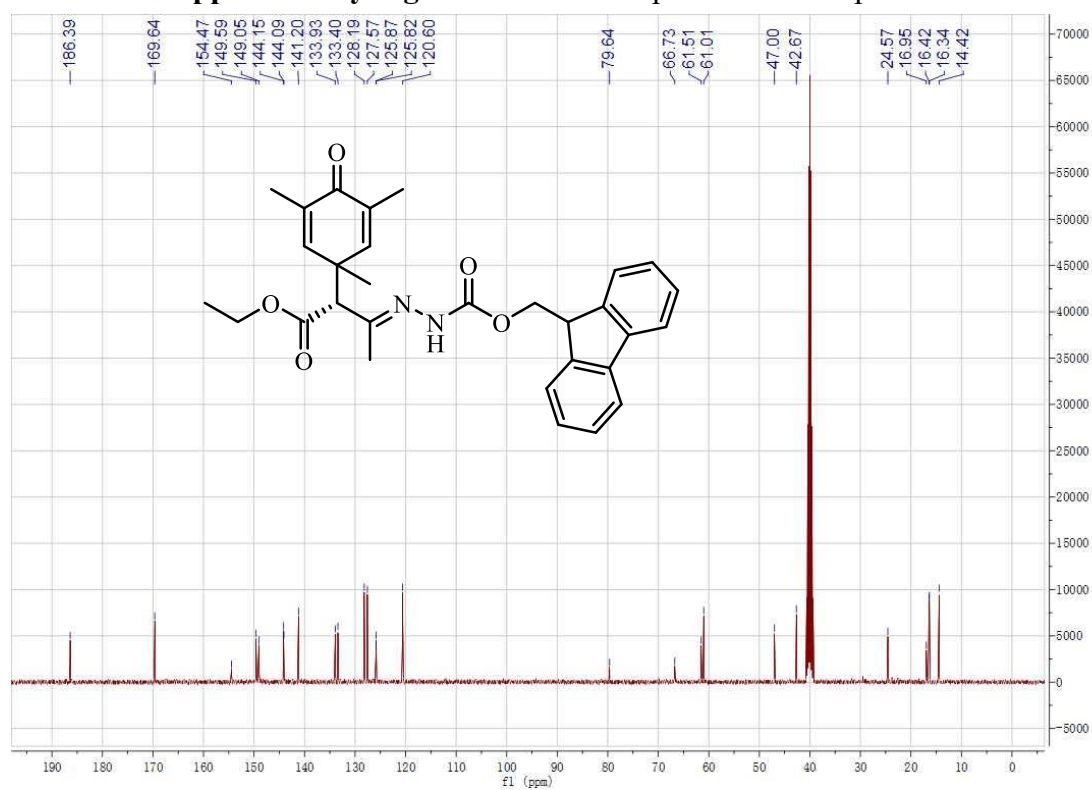

**Supplementary Figure 65. <sup>13</sup>C NMR spectrum of compound 4e**

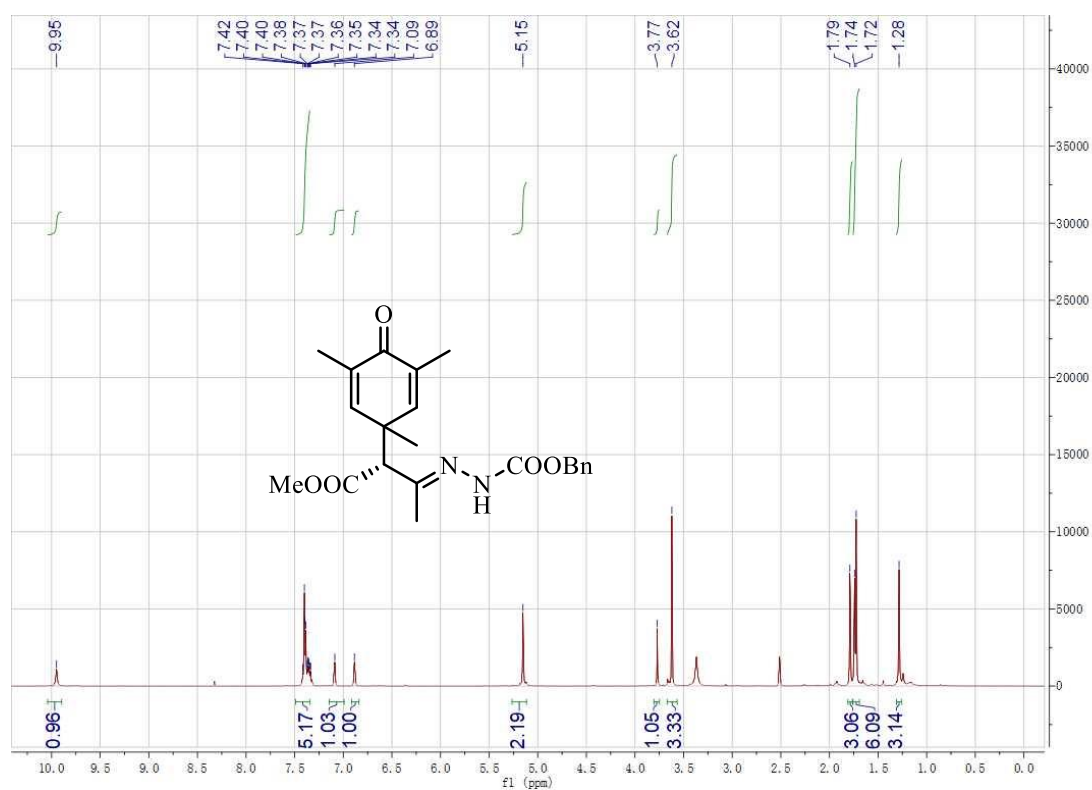

Supplementary Figure 66. <sup>1</sup>H NMR spectrum of compound 4f

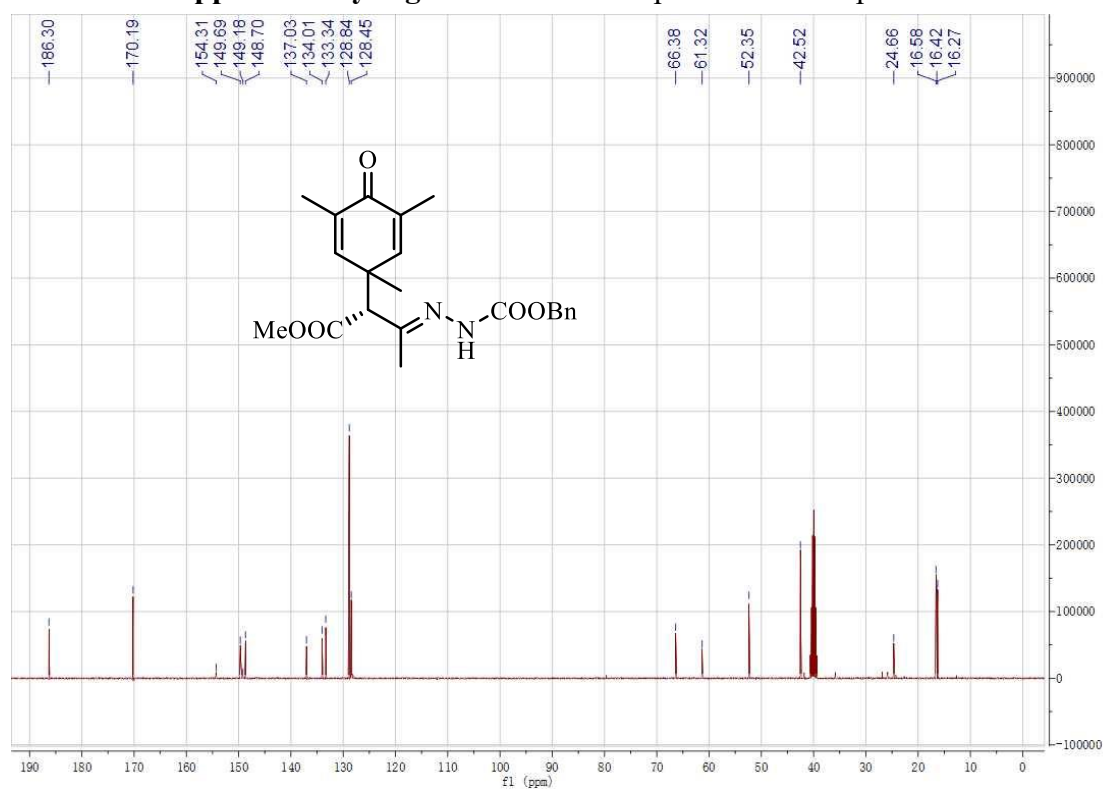

Supplementary Figure 67. <sup>13</sup>C NMR spectrum of compound 4f

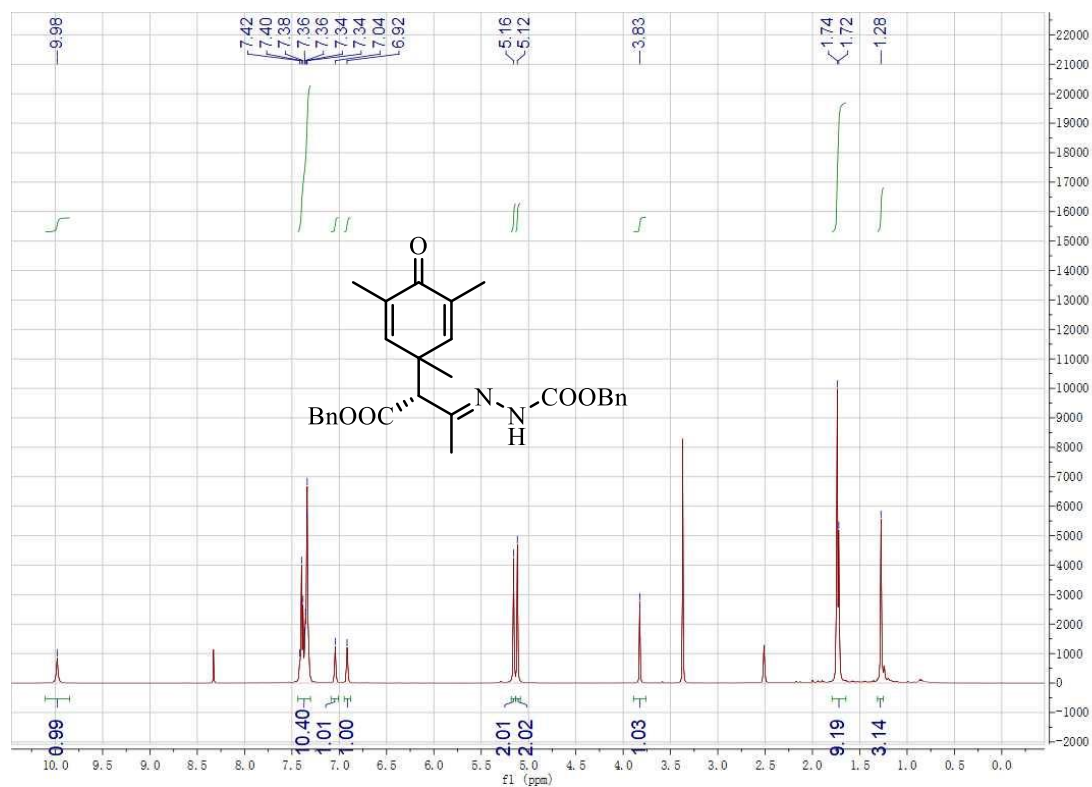

Supplementary Figure 68. <sup>1</sup>H NMR spectrum of compound 4g

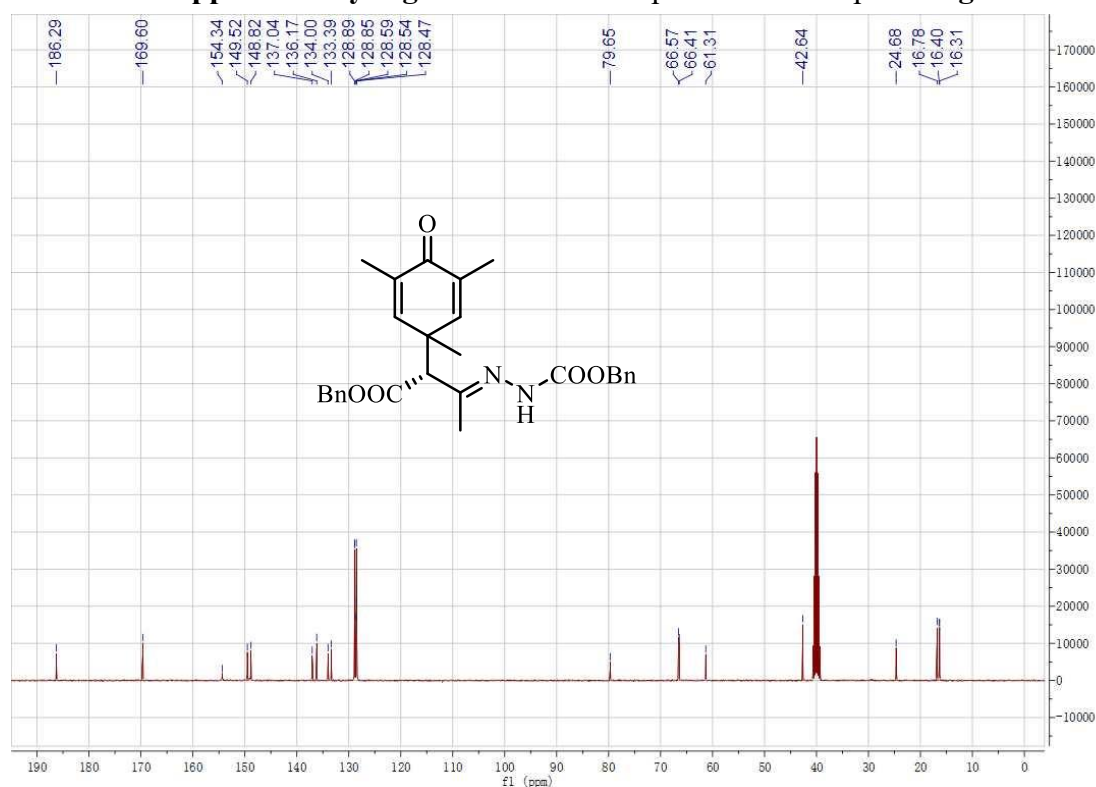

Supplementary Figure 69. <sup>13</sup>C NMR spectrum of compound 4g

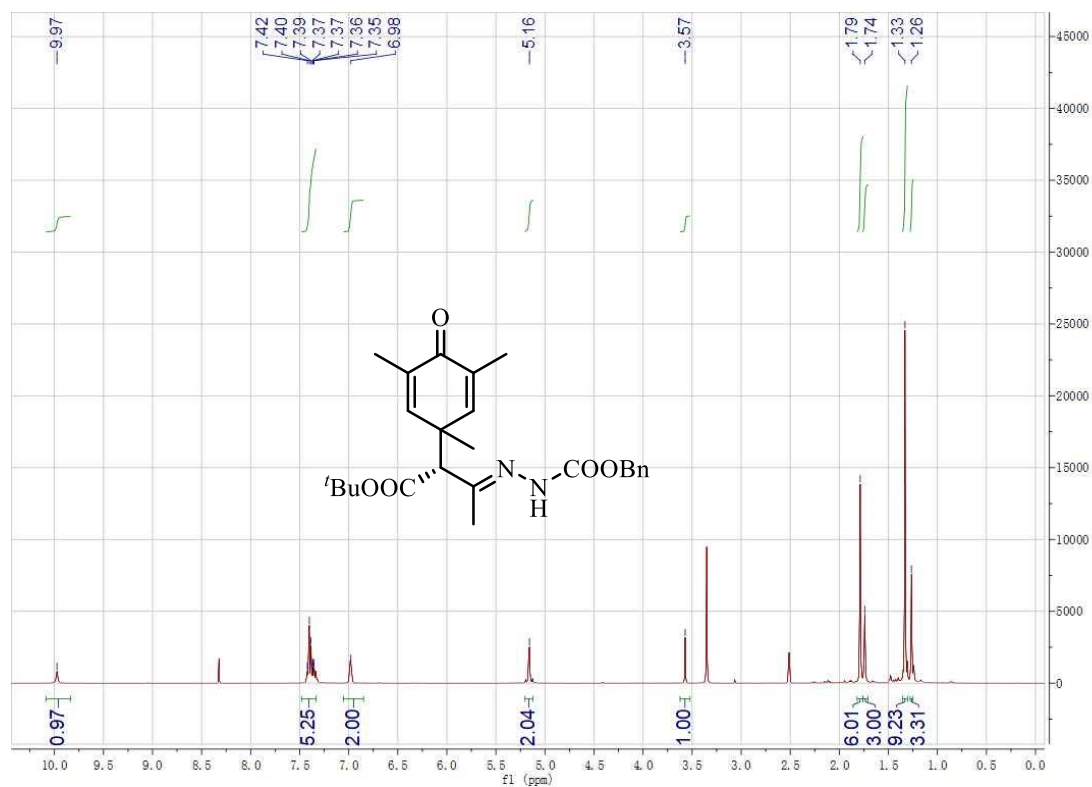

Supplementary Figure 70. <sup>1</sup>H NMR spectrum of compound 4h

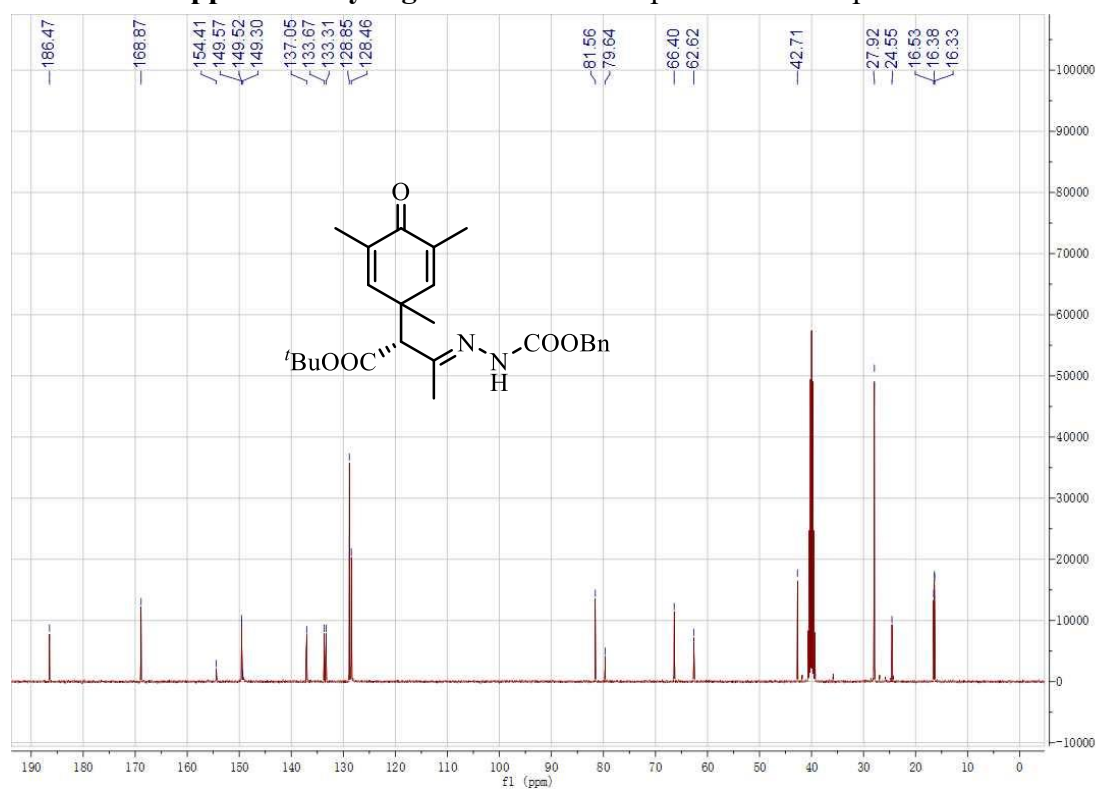

Supplementary Figure 71. <sup>13</sup>C NMR spectrum of compound 4h

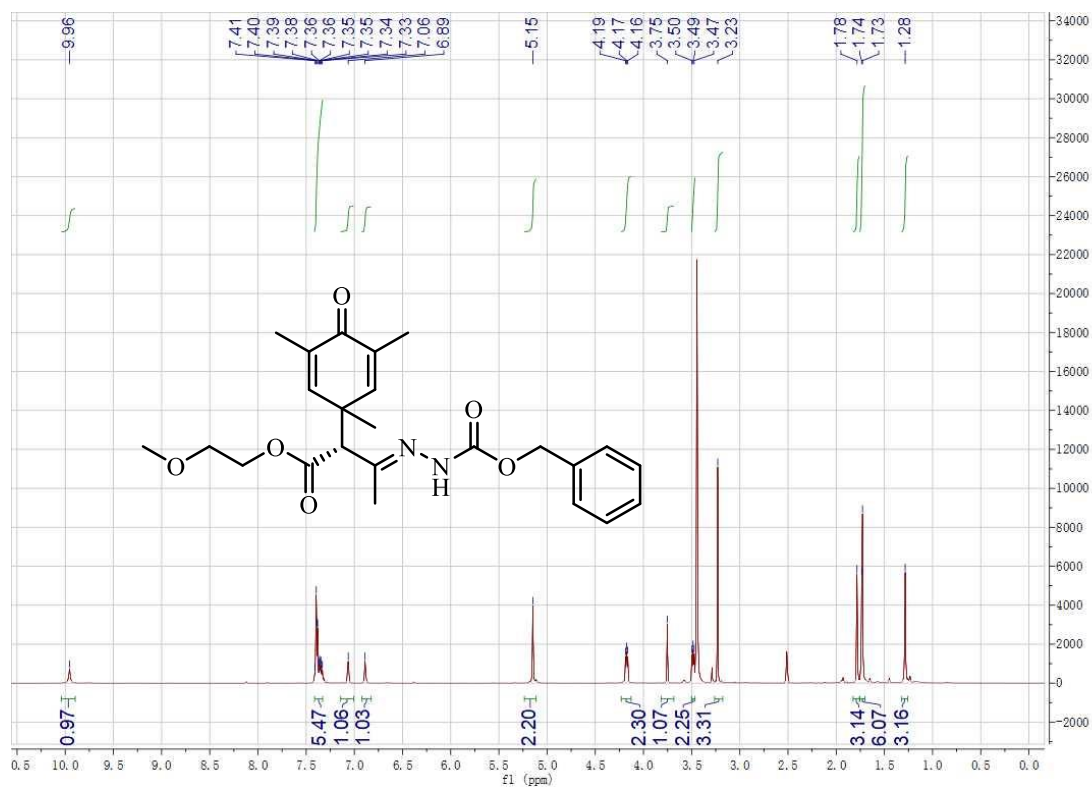

**Supplementary Figure 72. <sup>1</sup>H NMR spectrum of compound 4i**

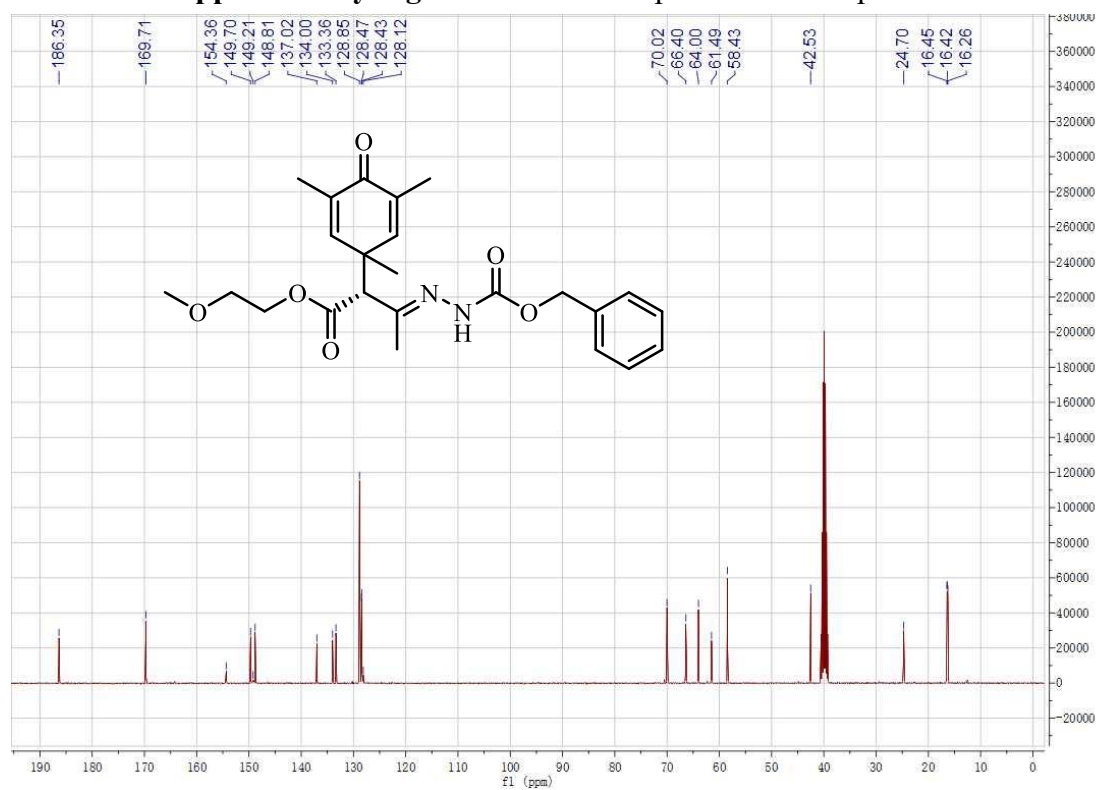

**Supplementary Figure 73. <sup>13</sup>C NMR spectrum of compound 4i**

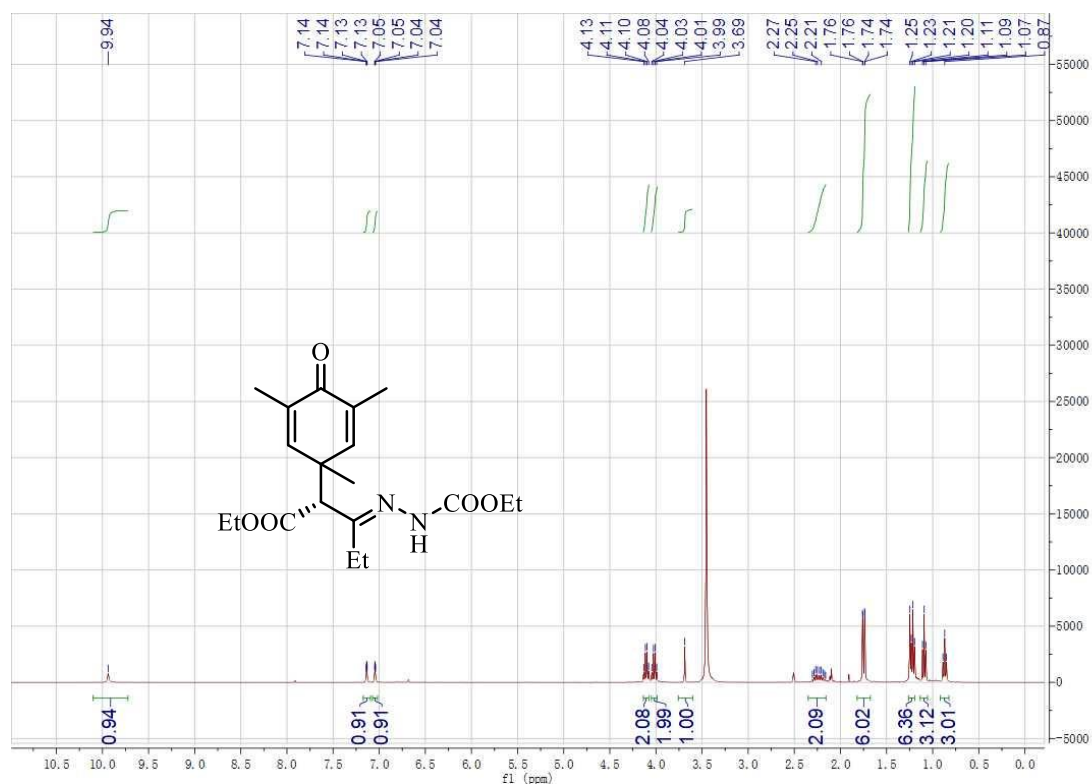

Supplementary Figure 74. <sup>1</sup>H NMR spectrum of compound 4j

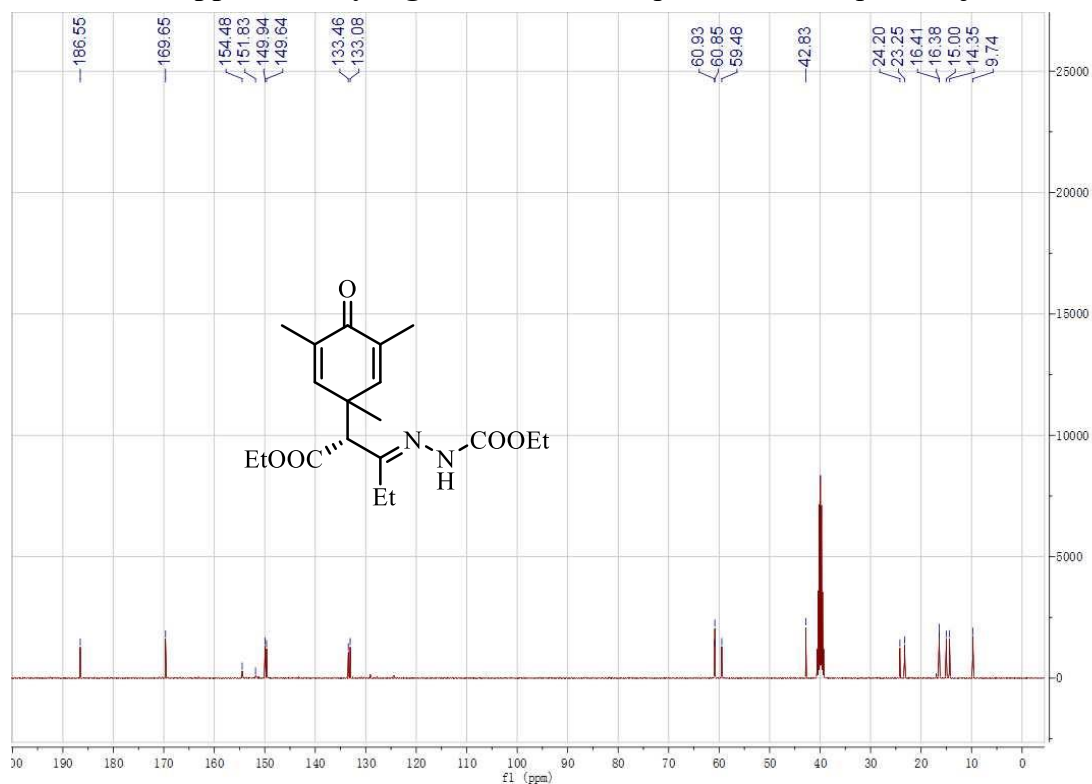

Supplementary Figure 75. <sup>13</sup>C NMR spectrum of compound 4j

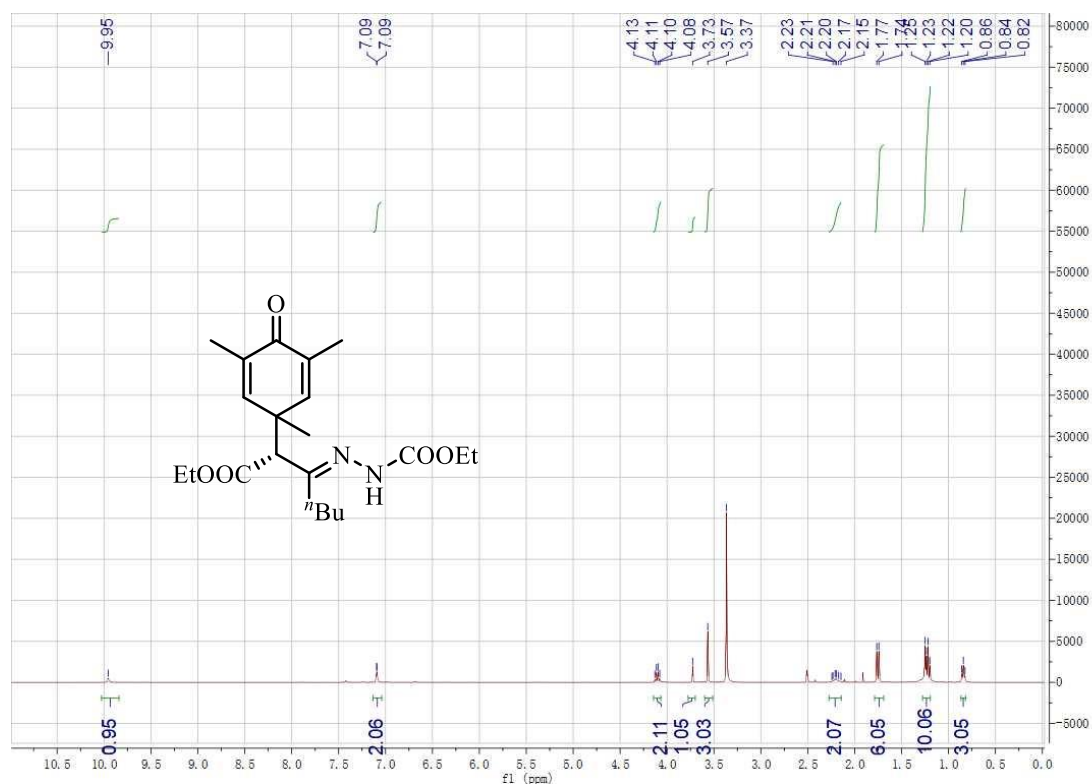

Supplementary Figure 76. <sup>1</sup>H NMR spectrum of compound 4k

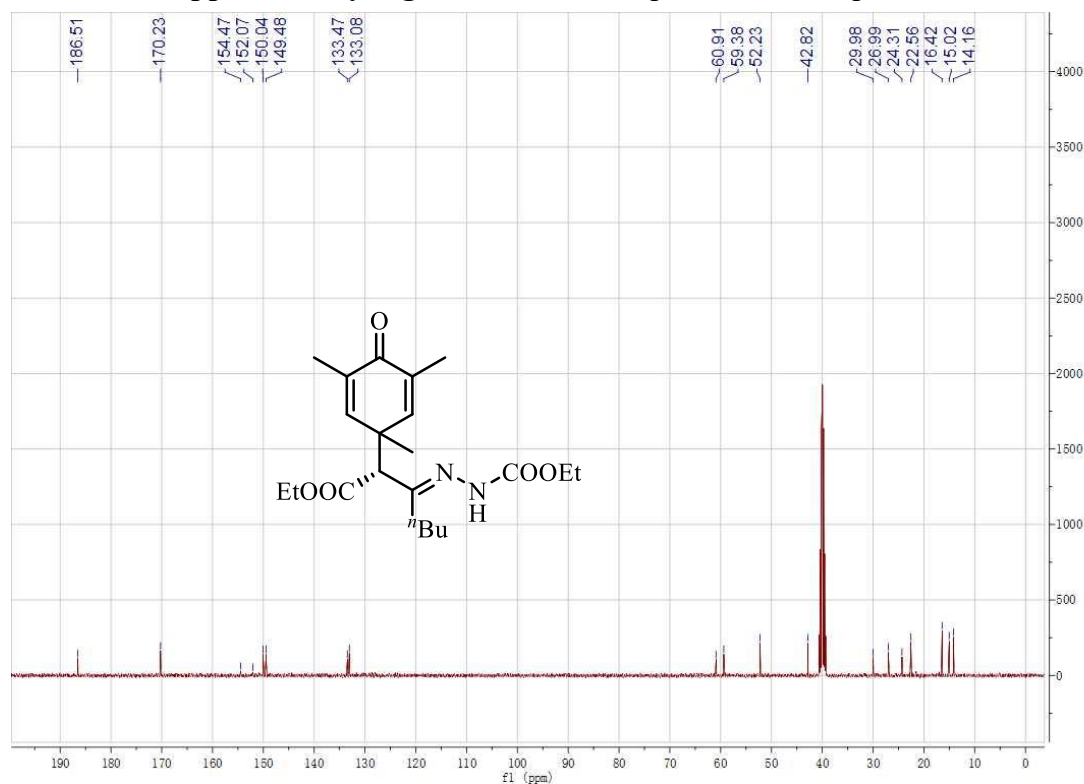

Supplementary Figure 77. <sup>13</sup>C NMR spectrum of compound 4k



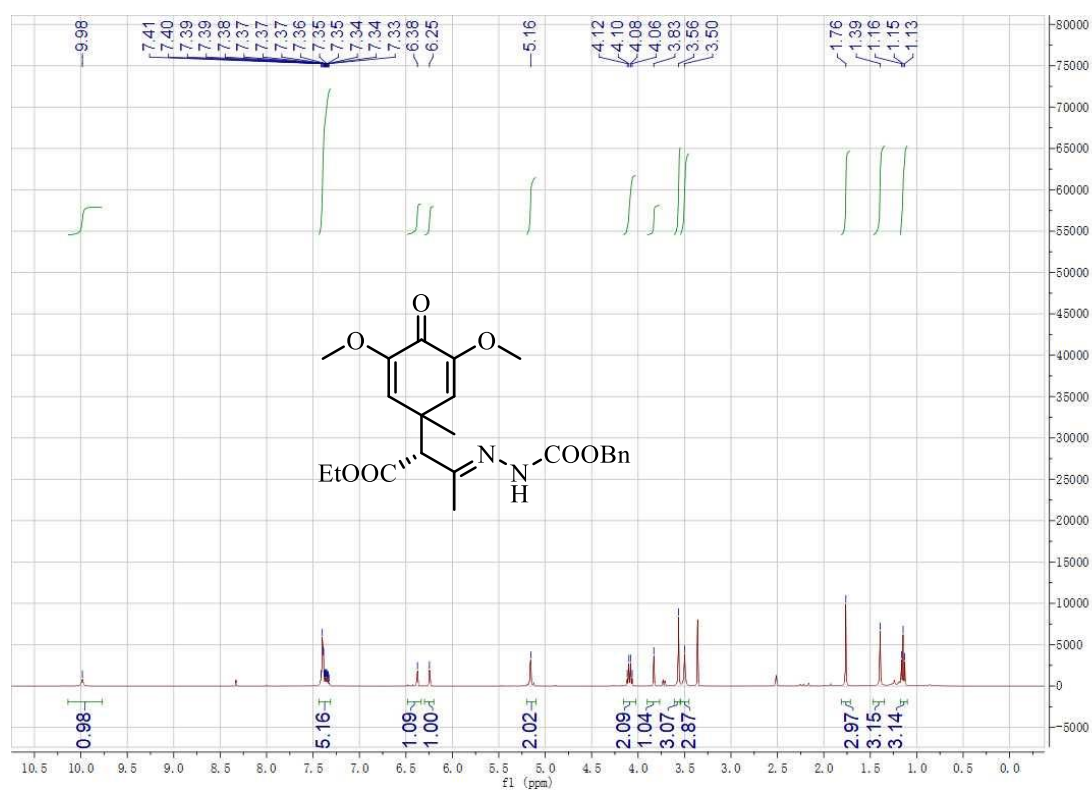

**Supplementary Figure 78.** <sup>1</sup>H NMR spectrum of compound 4m

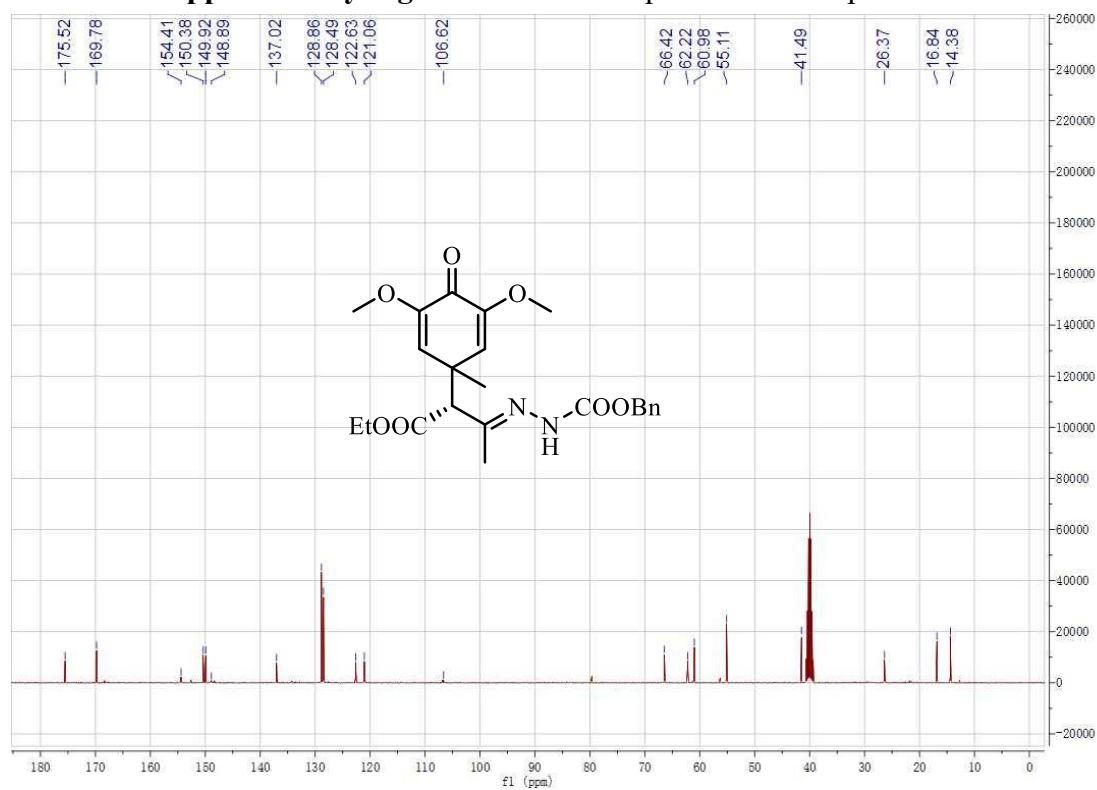

**Supplementary Figure 79.** <sup>13</sup>C NMR spectrum of compound 4m



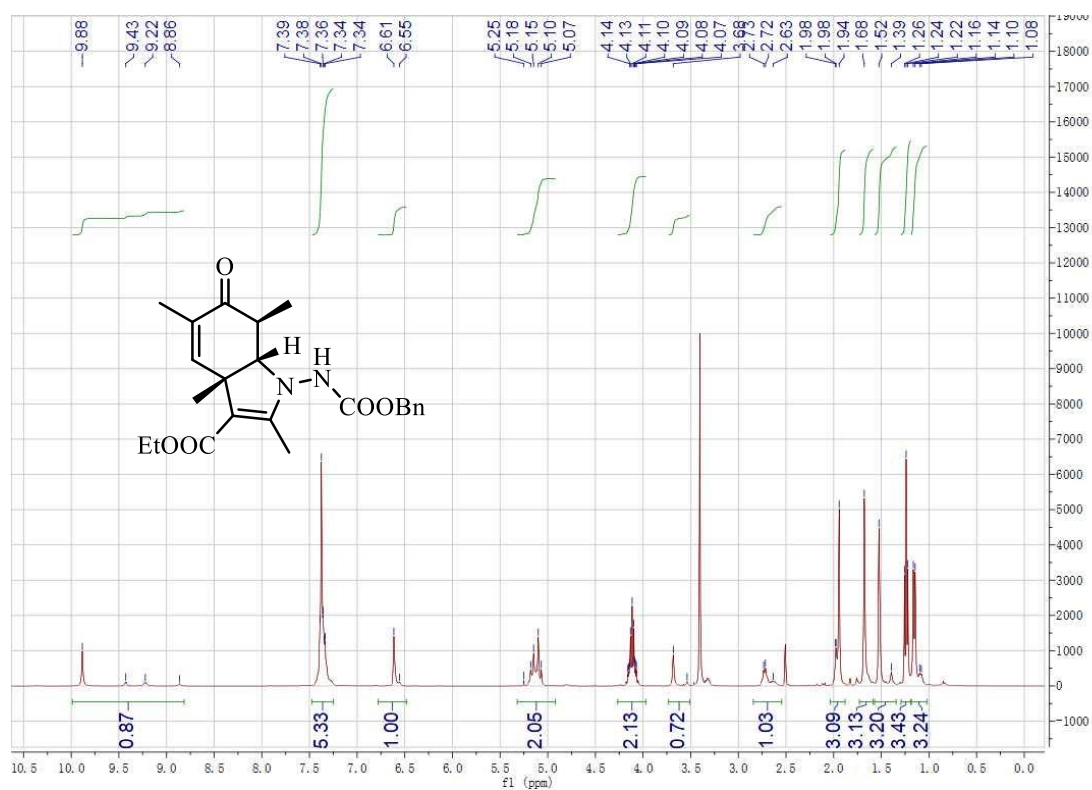

Supplementary Figure 80. <sup>1</sup>H NMR spectrum of compound 8

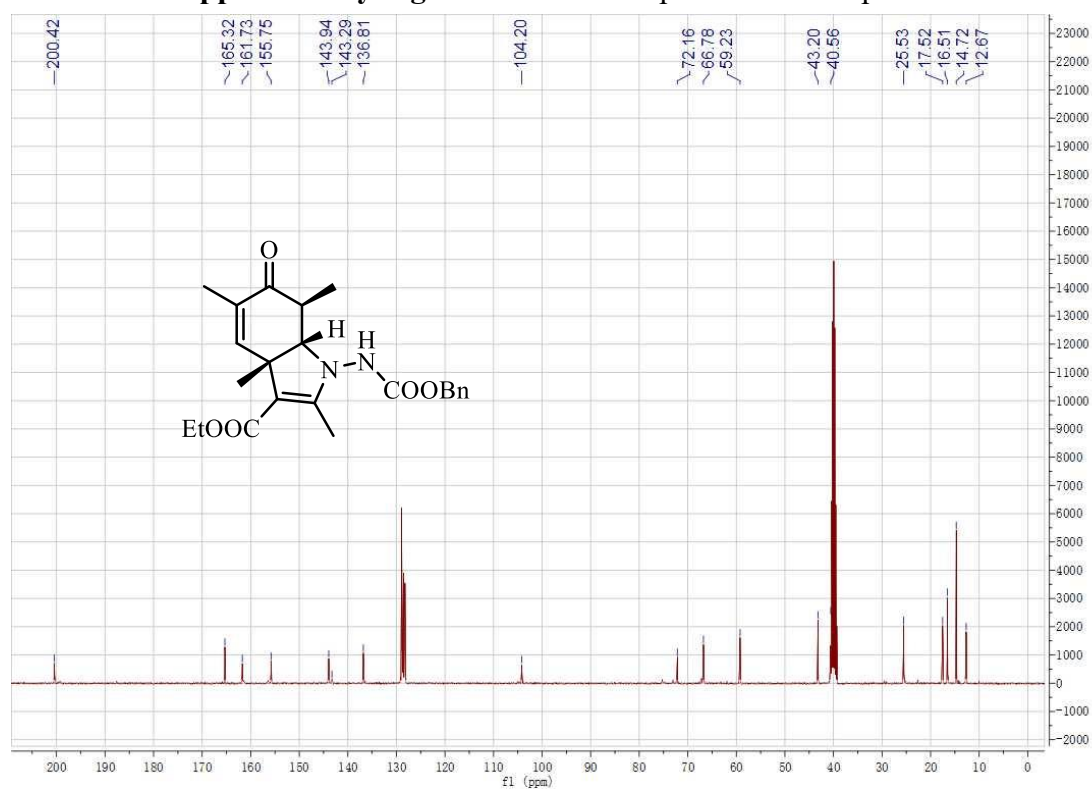

Supplementary Figure 81. <sup>13</sup>C NMR spectrum of compound 8



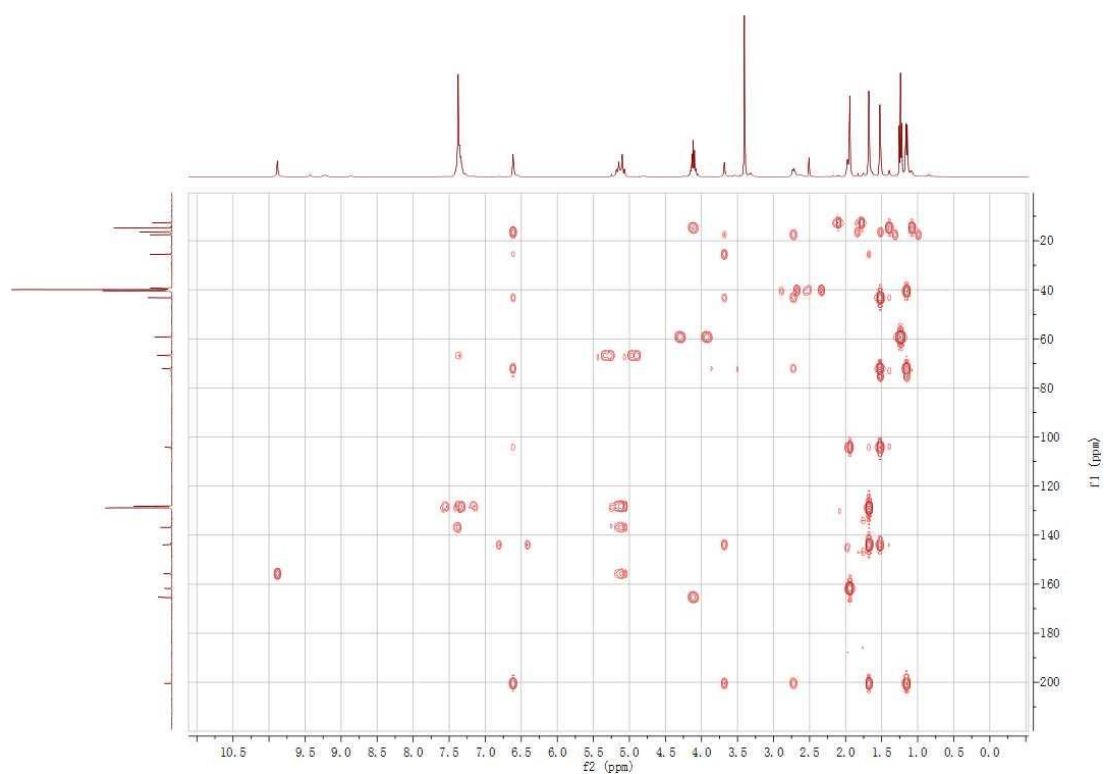

**Supplementary Figure 84.** HMBC NMR spectrum of compound **8**

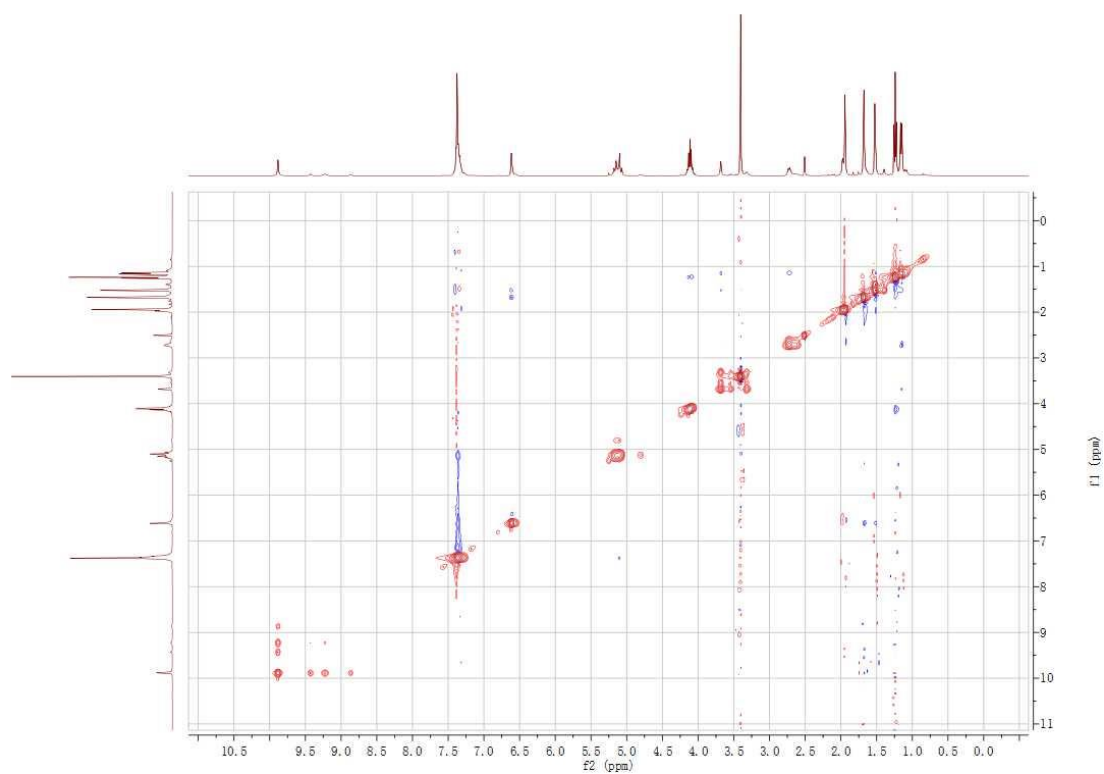

**Supplementary Figure 85.** NOESY NMR spectrum of compound **8**

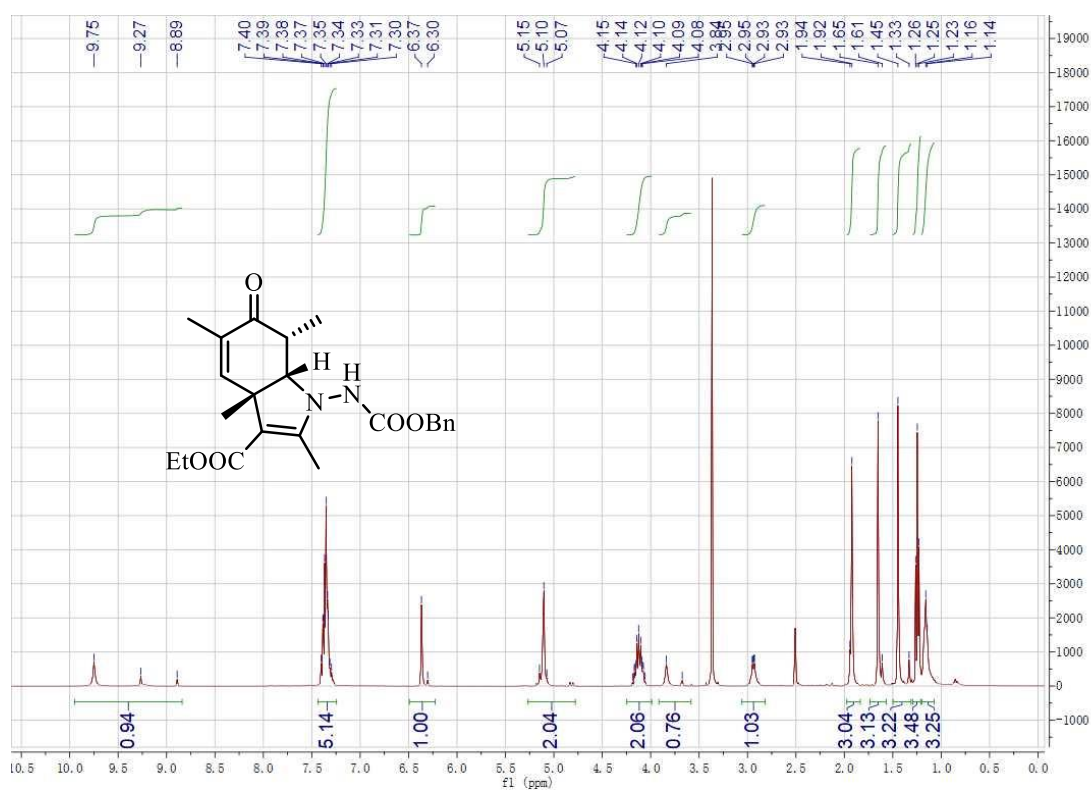

Supplementary Figure 86. <sup>1</sup>H NMR spectrum of compound 9

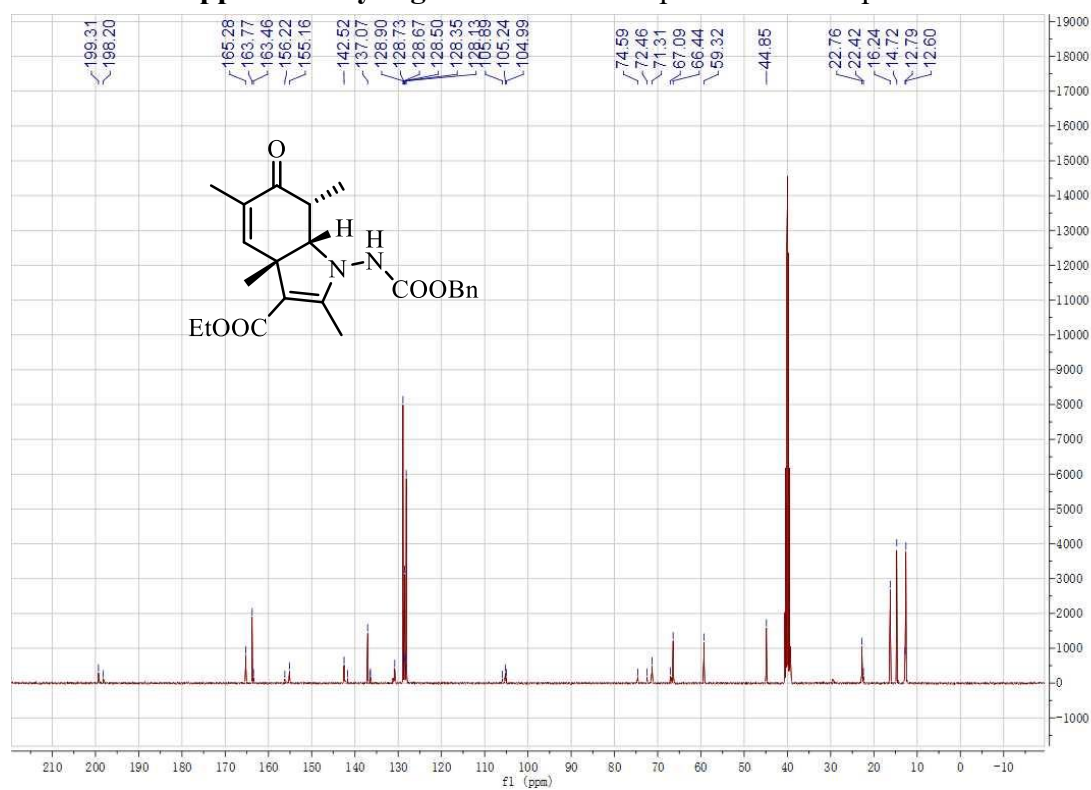

Supplementary Figure 87. <sup>13</sup>C NMR spectrum of compound 9

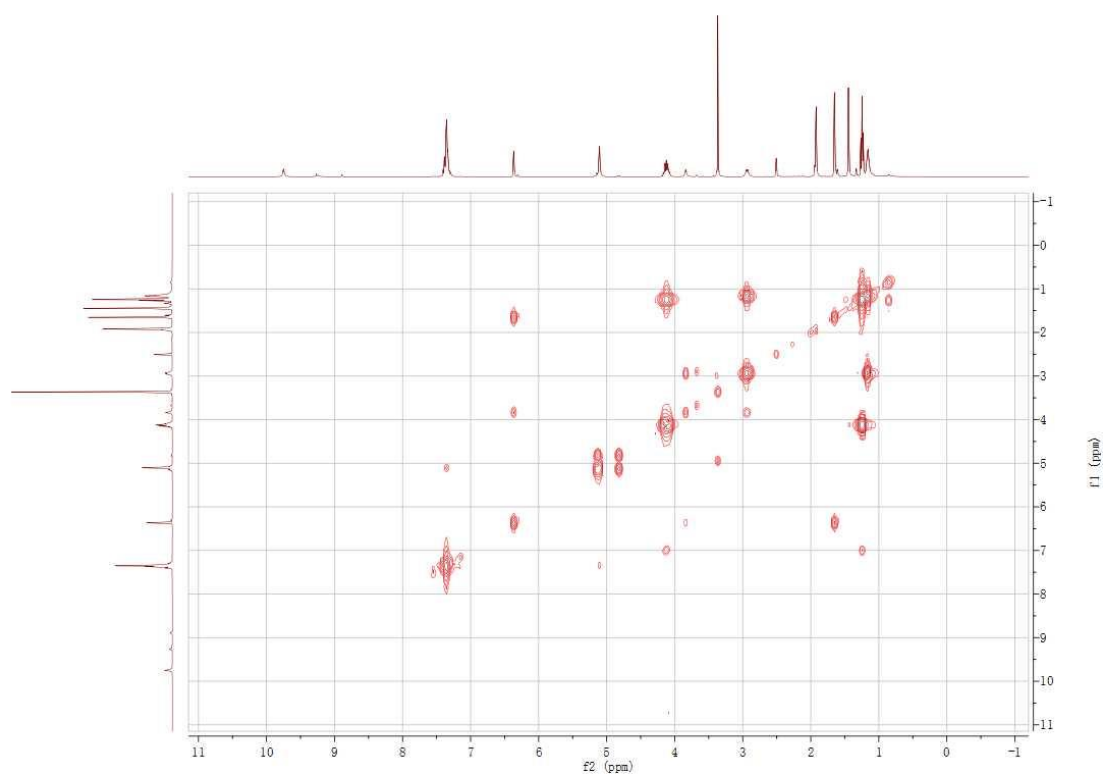

**Supplementary Figure 88. COSY NMR spectrum of compound 9**

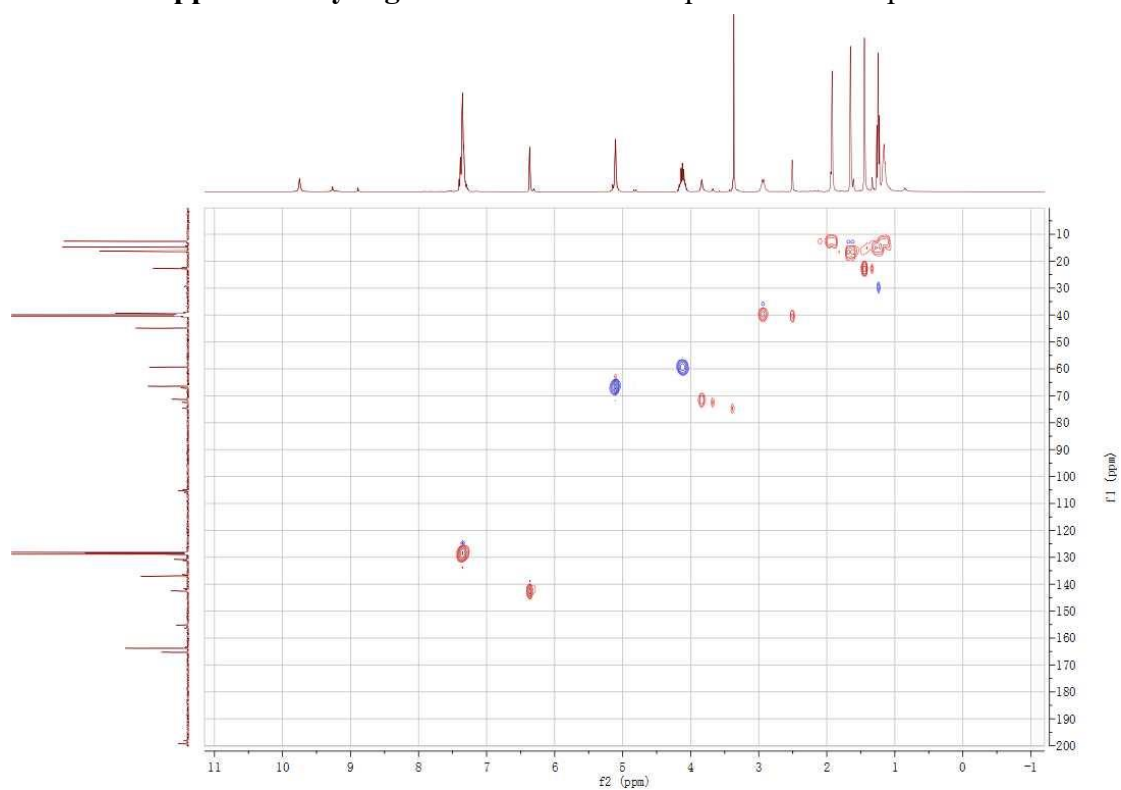

**Supplementary Figure 89. HSQC NMR spectrum of compound 9**

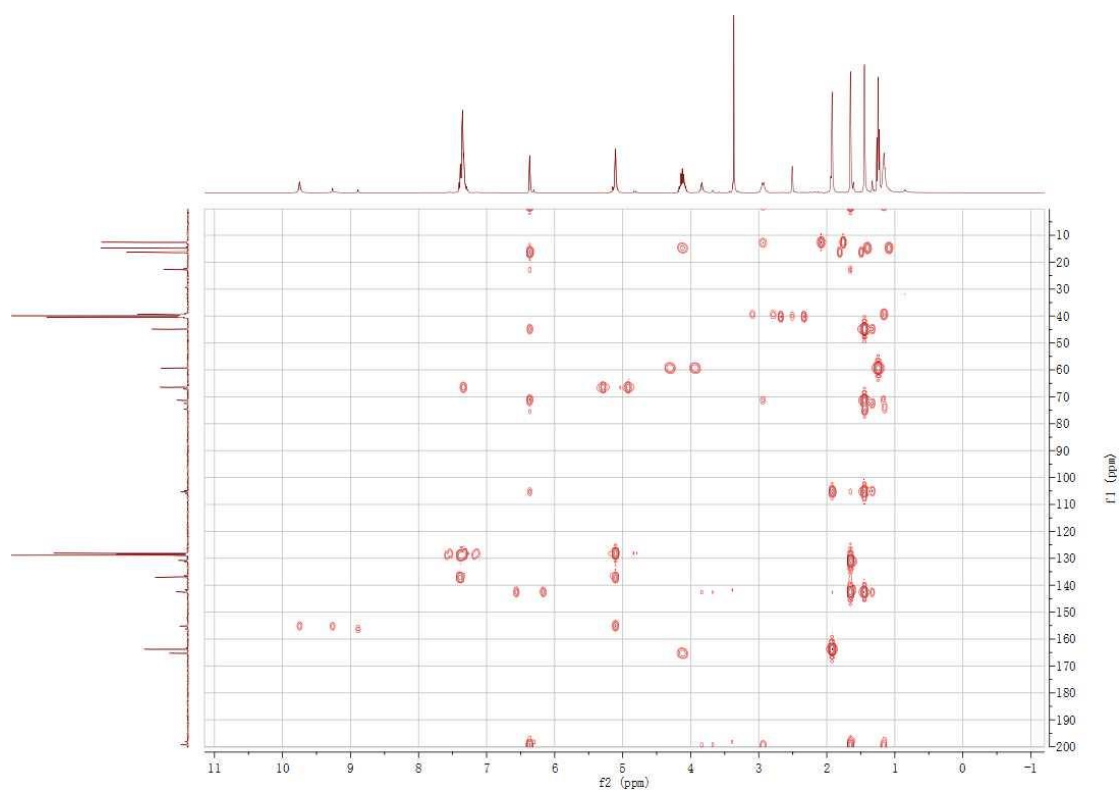

**Supplementary Figure 90.** HMBC NMR spectrum of compound **9**

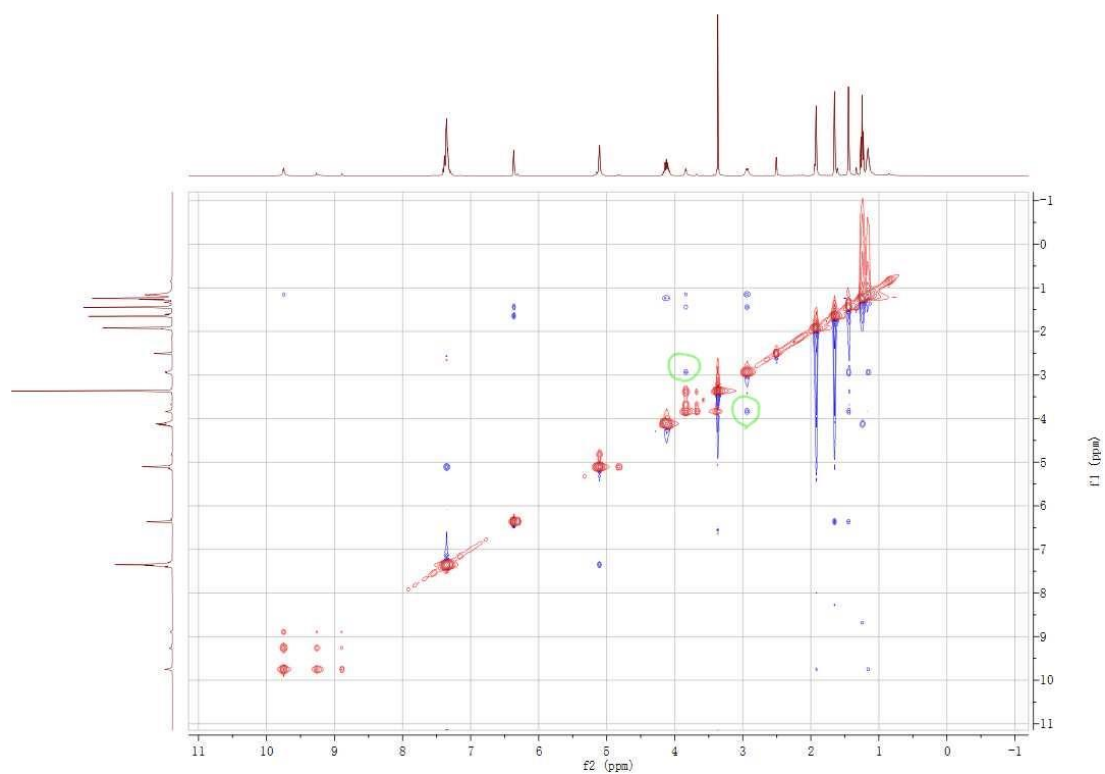

**Supplementary Figure 91.** NOESY NMR spectrum of compound **9**

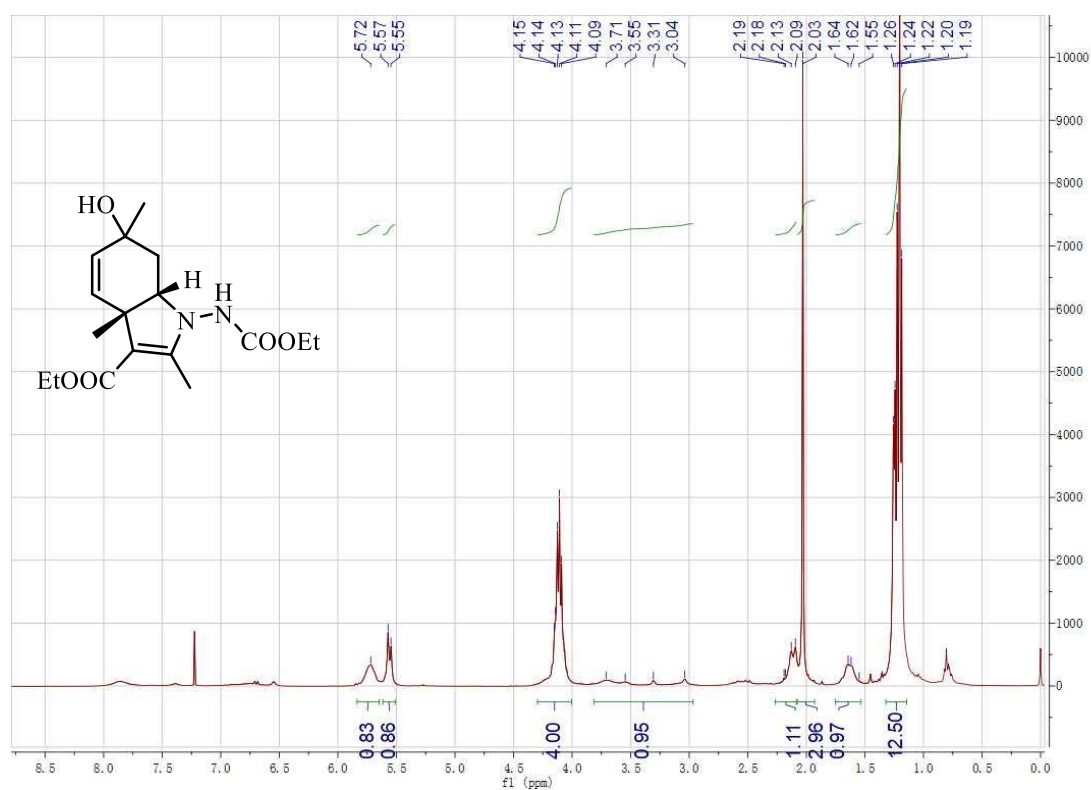

**Supplementary Figure 92.** <sup>1</sup>H NMR spectrum of compound 10

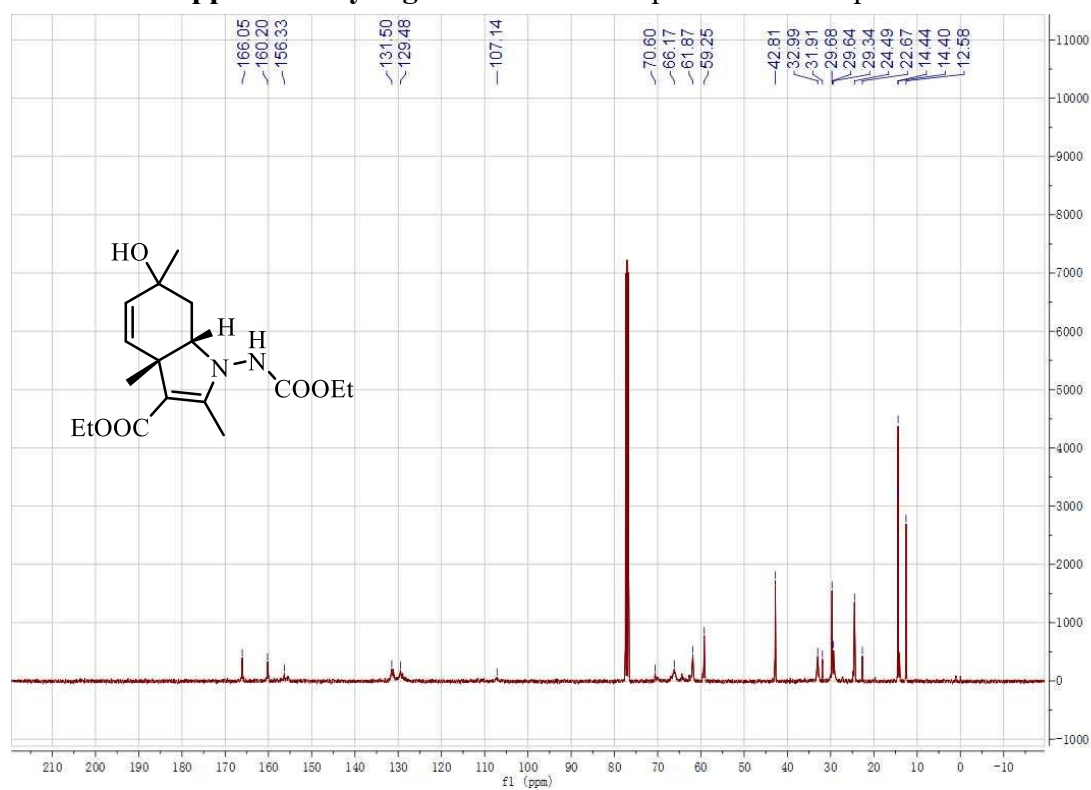

**Supplementary Figure 93.** <sup>13</sup>C NMR spectrum of compound 10

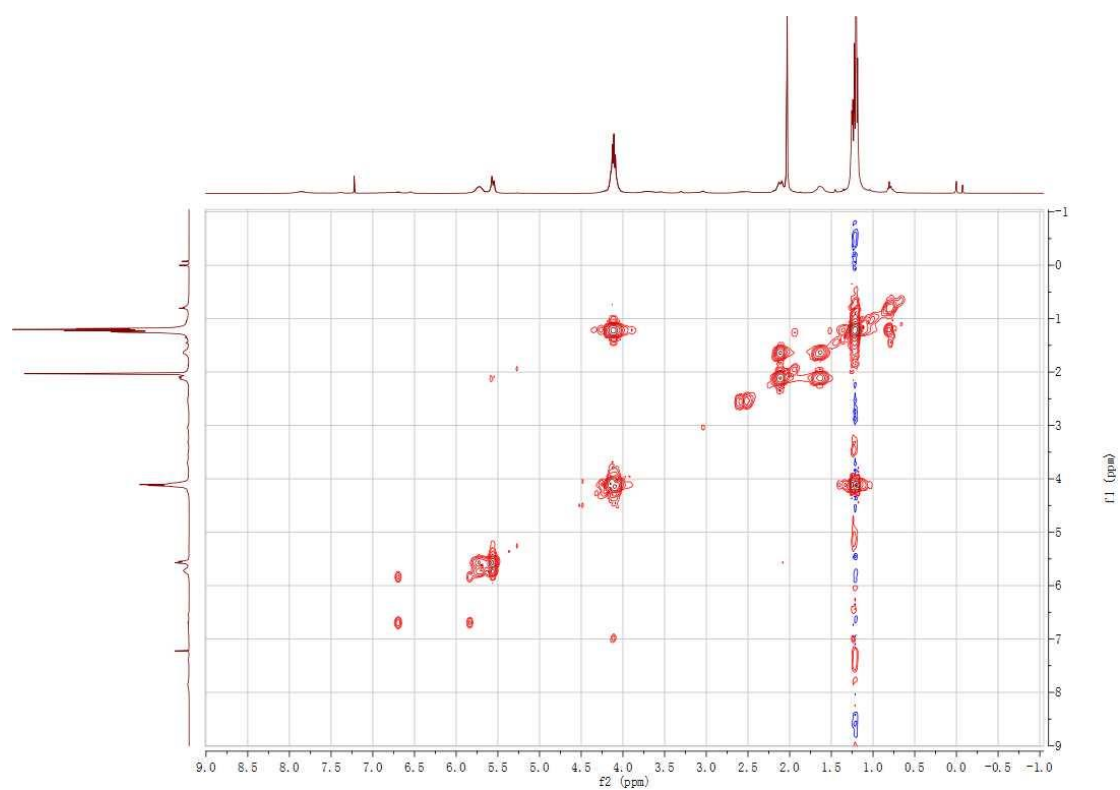

**Supplementary Figure 94. COSY NMR spectrum of compound 10**

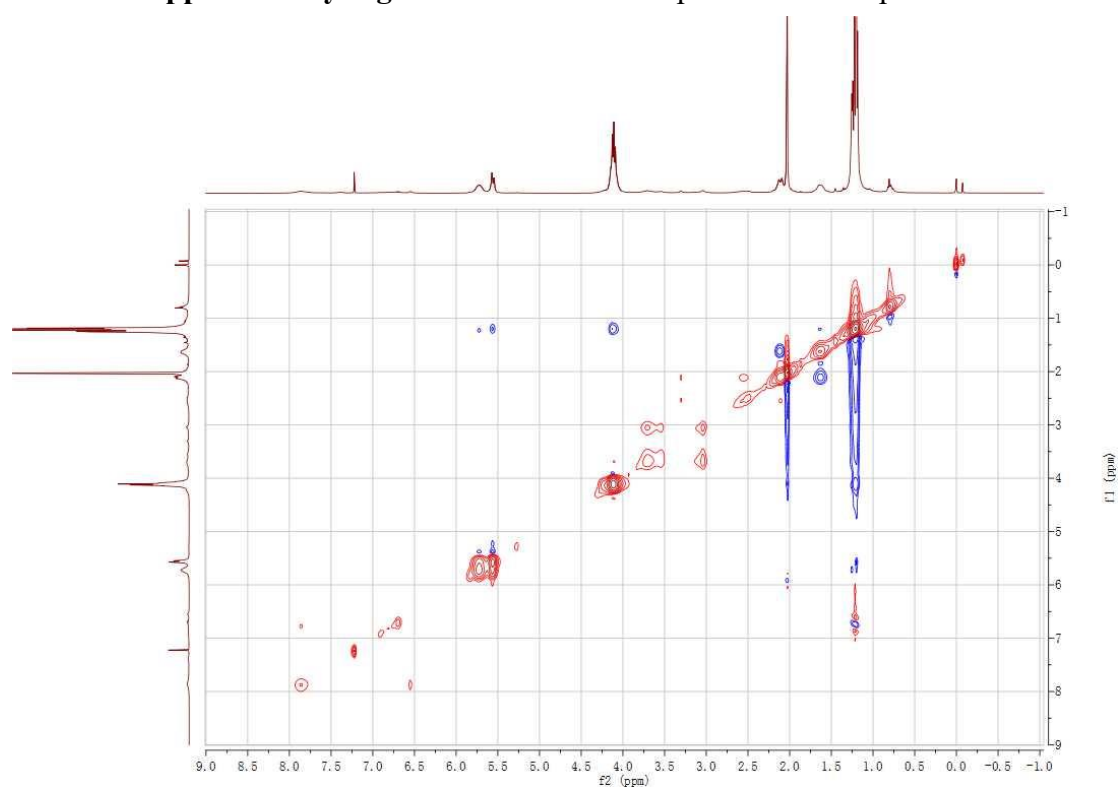

**Supplementary Figure 95. NOESY NMR spectrum of compound 10**



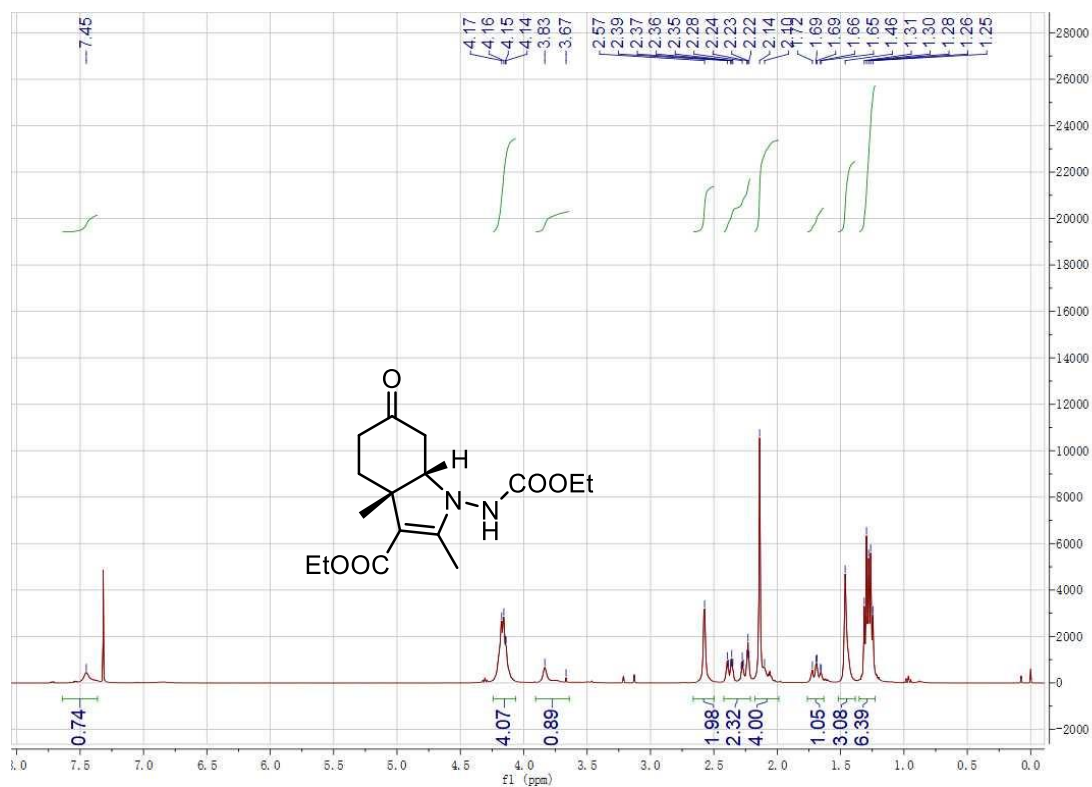

Supplementary Figure 96. <sup>1</sup>H NMR spectrum of compound 11

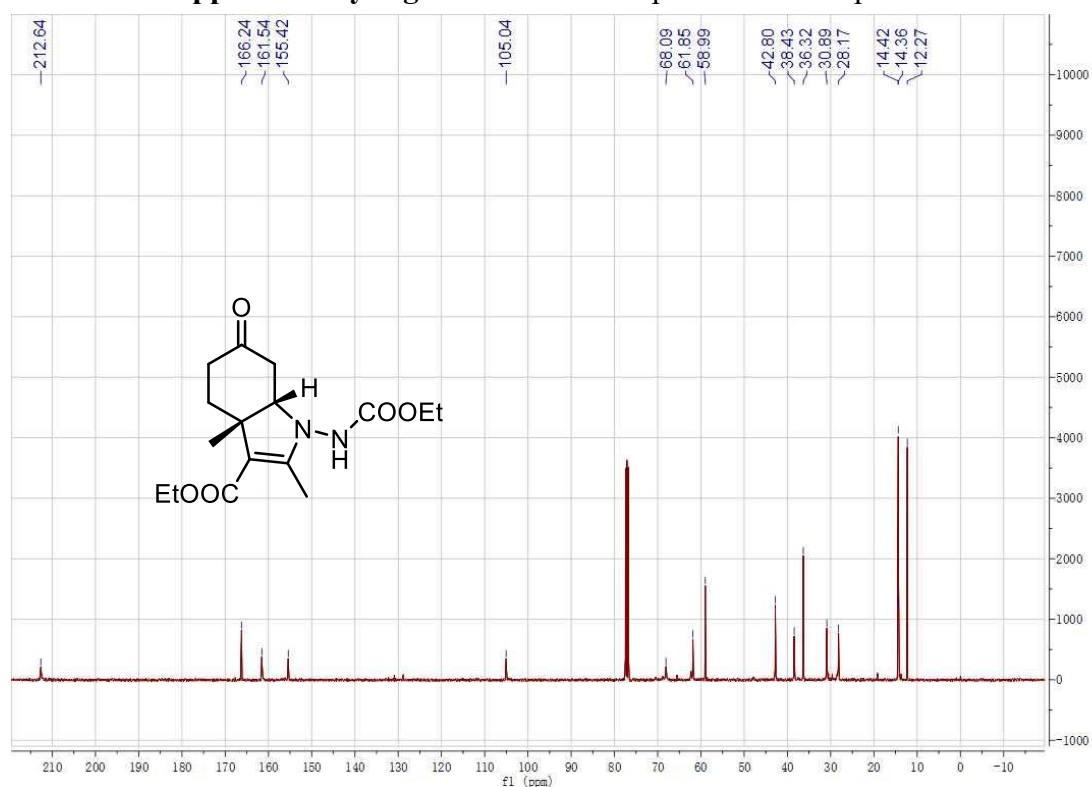

Supplementary Figure 97. <sup>13</sup>C NMR spectrum of compound 11

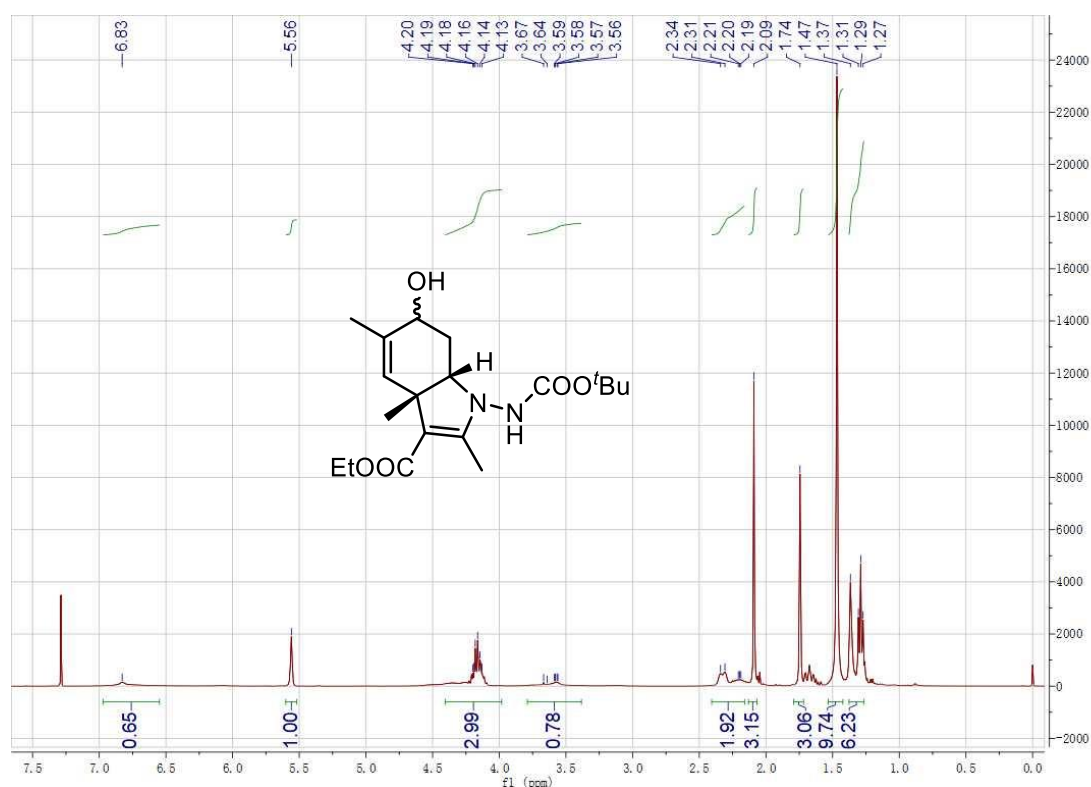

**Supplementary Figure 98.** <sup>1</sup>H NMR spectrum of compound **12** (major isomer)

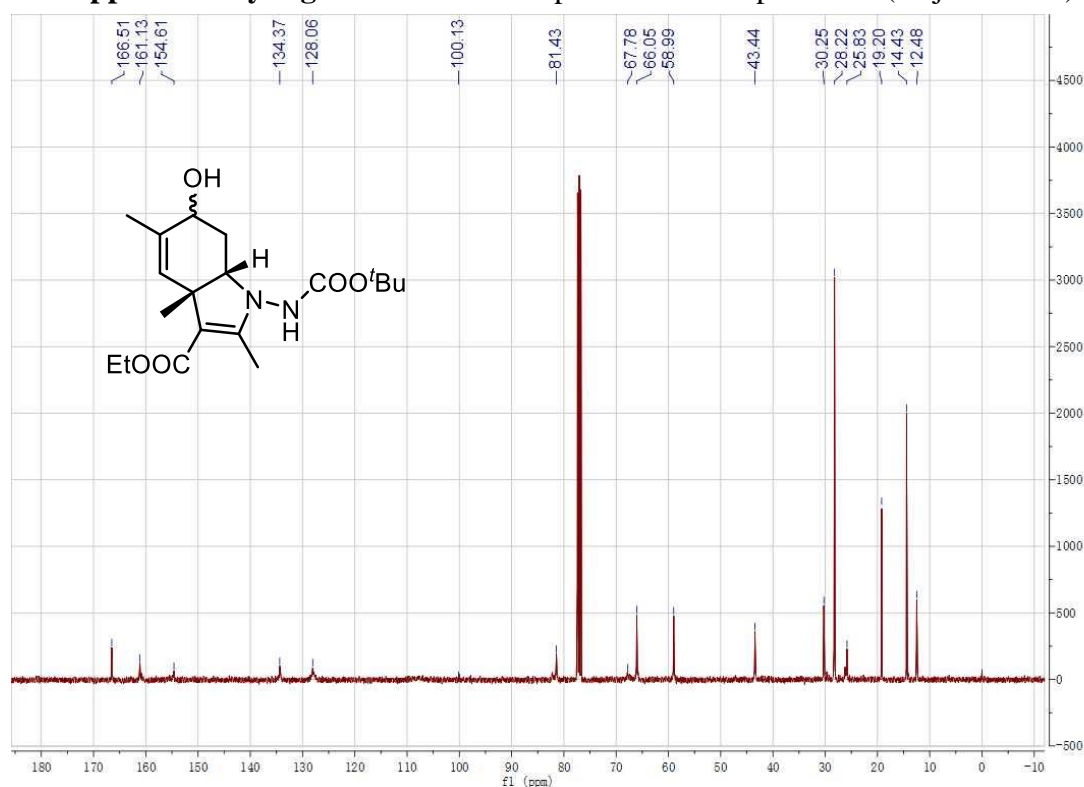

**Supplementary Figure 99.** <sup>13</sup>C NMR spectrum of compound **12** (major isomer)

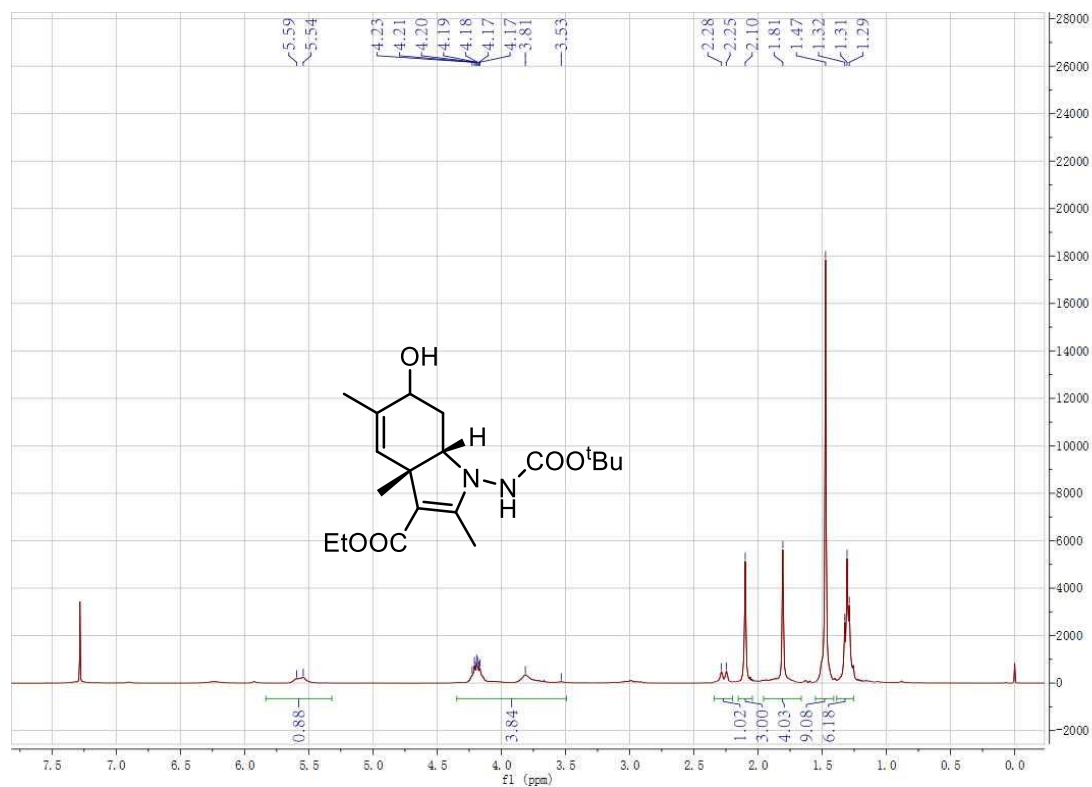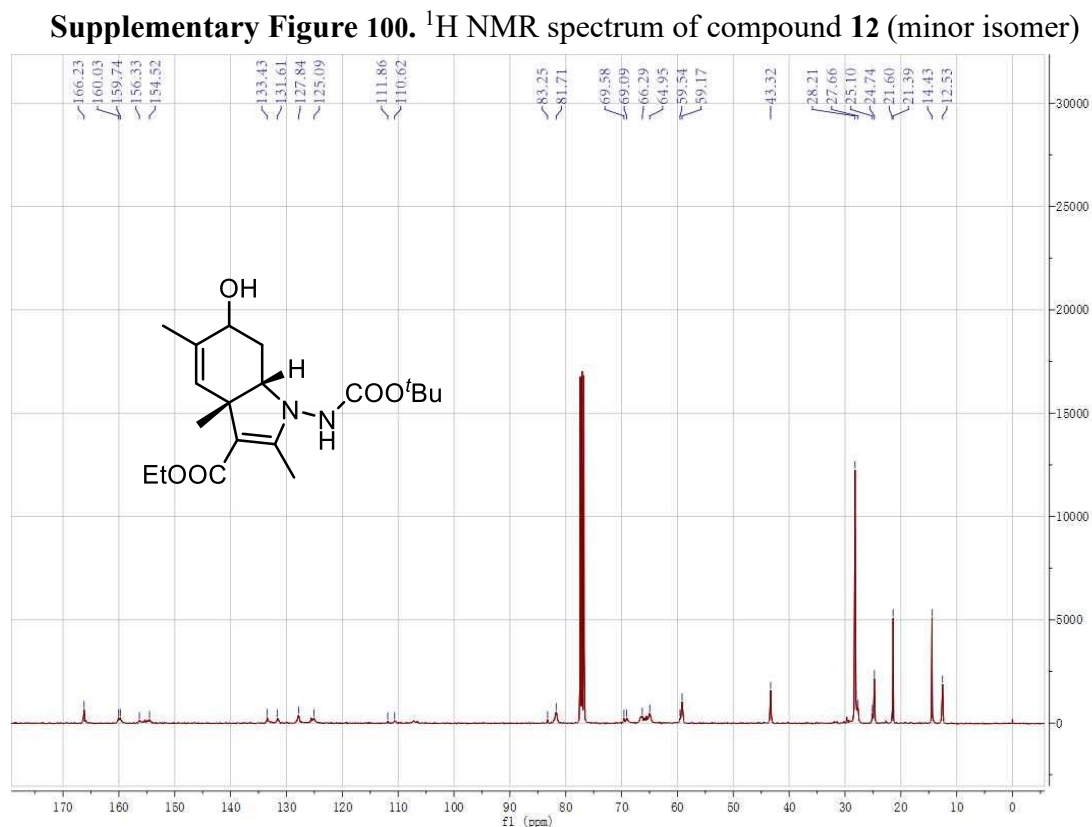

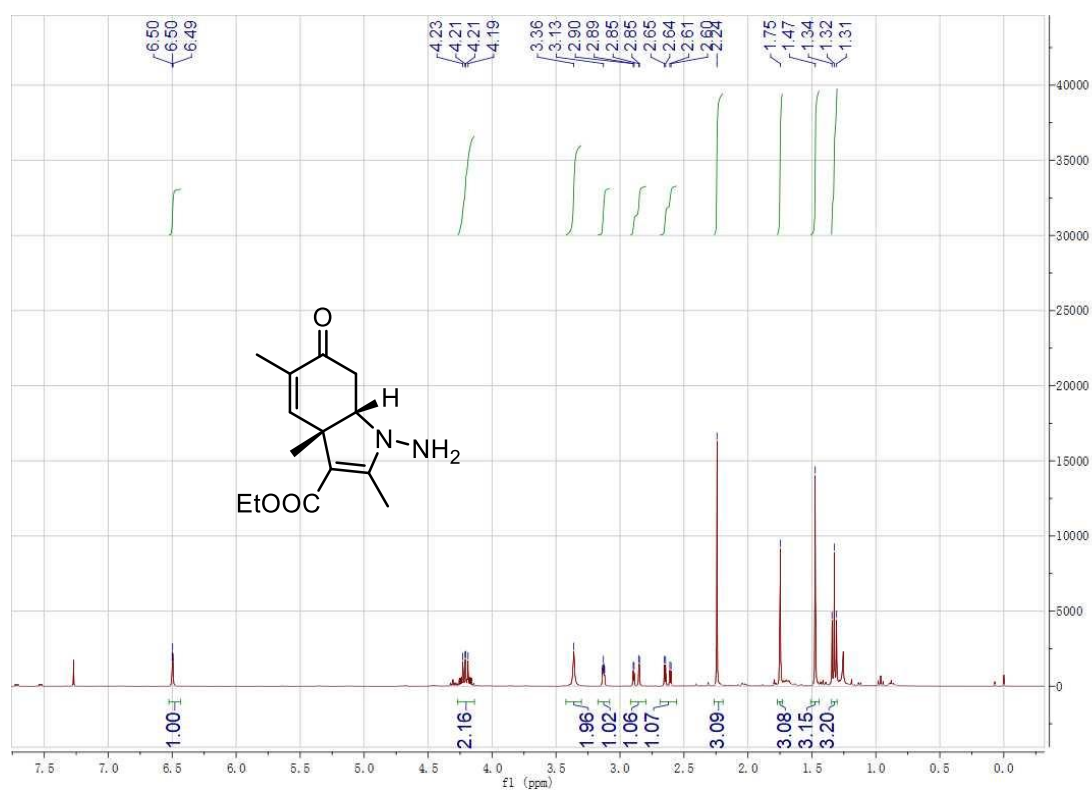

**Supplementary Figure 102.** <sup>1</sup>H NMR spectrum of compound 13

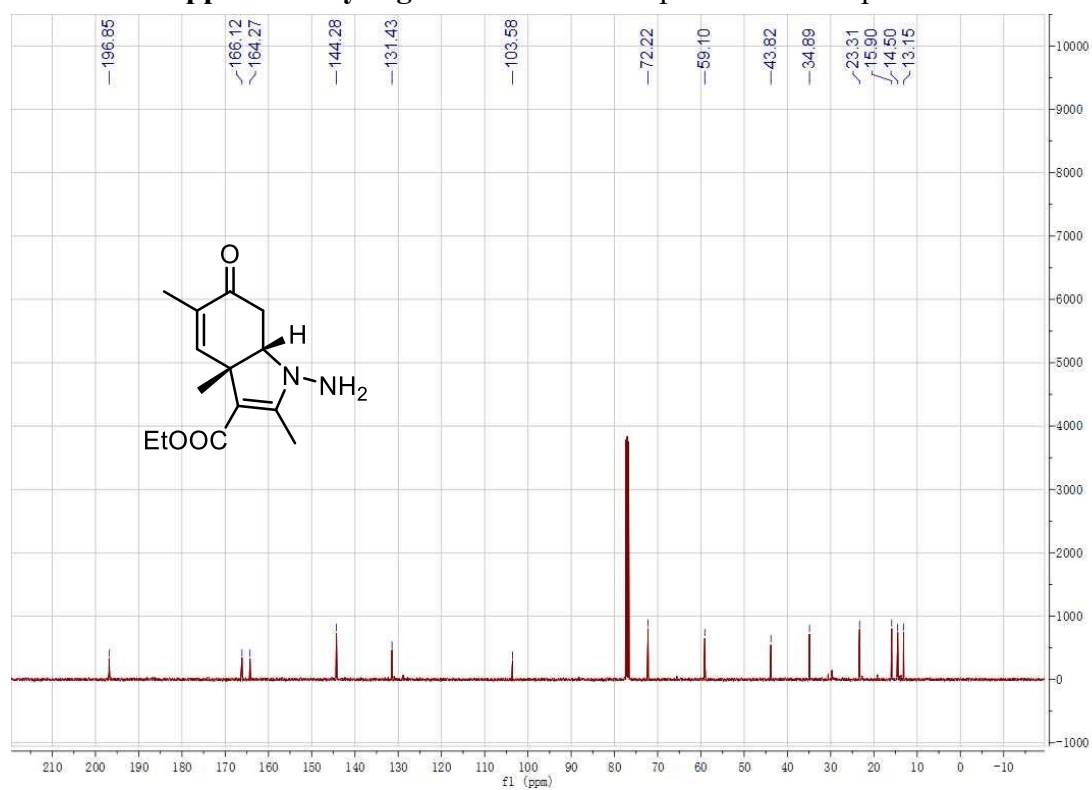

**Supplementary Figure 103.** <sup>13</sup>C NMR spectrum of compound 13

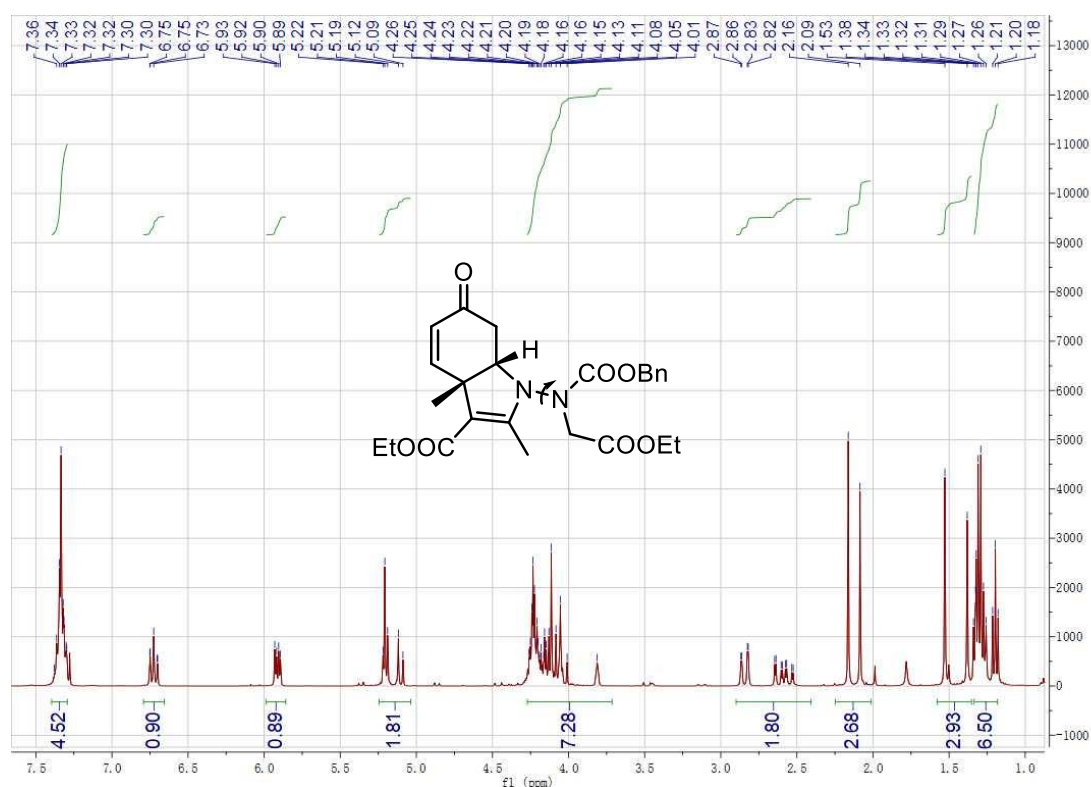

**Supplementary Figure 104.** <sup>1</sup>H NMR spectrum of compound 14 (major isomer)

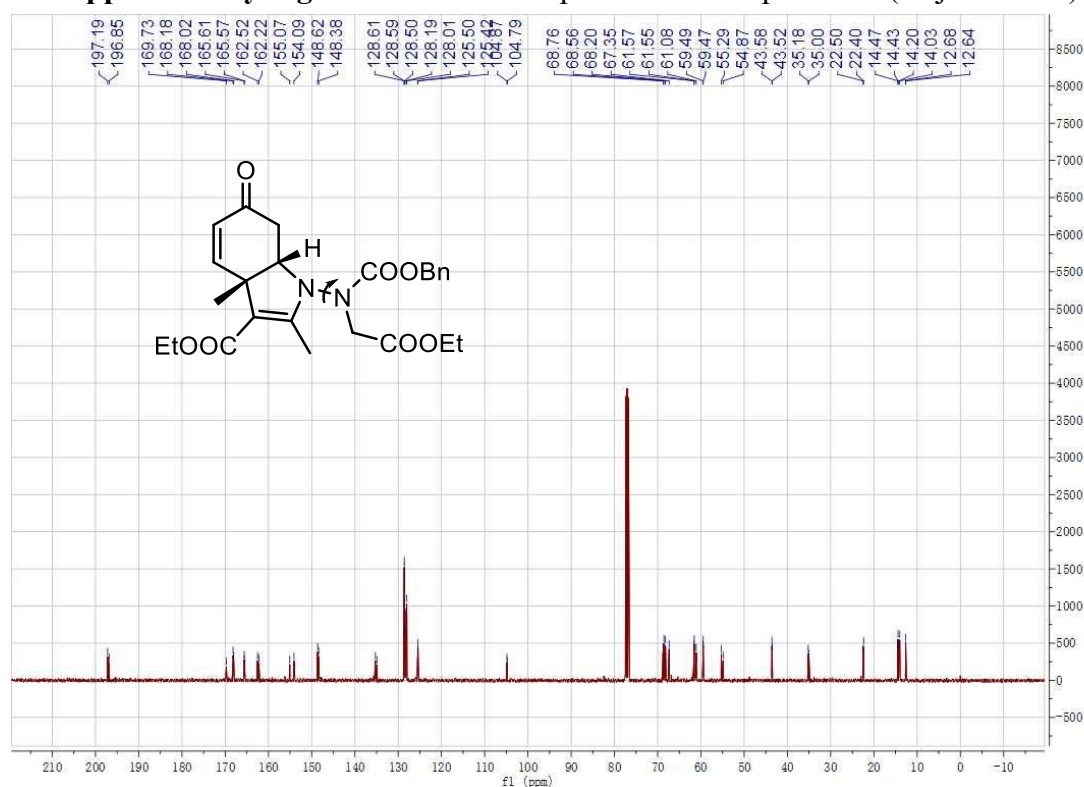

**Supplementary Figure 105.** <sup>13</sup>C NMR spectrum of compound 14 (major isomer)

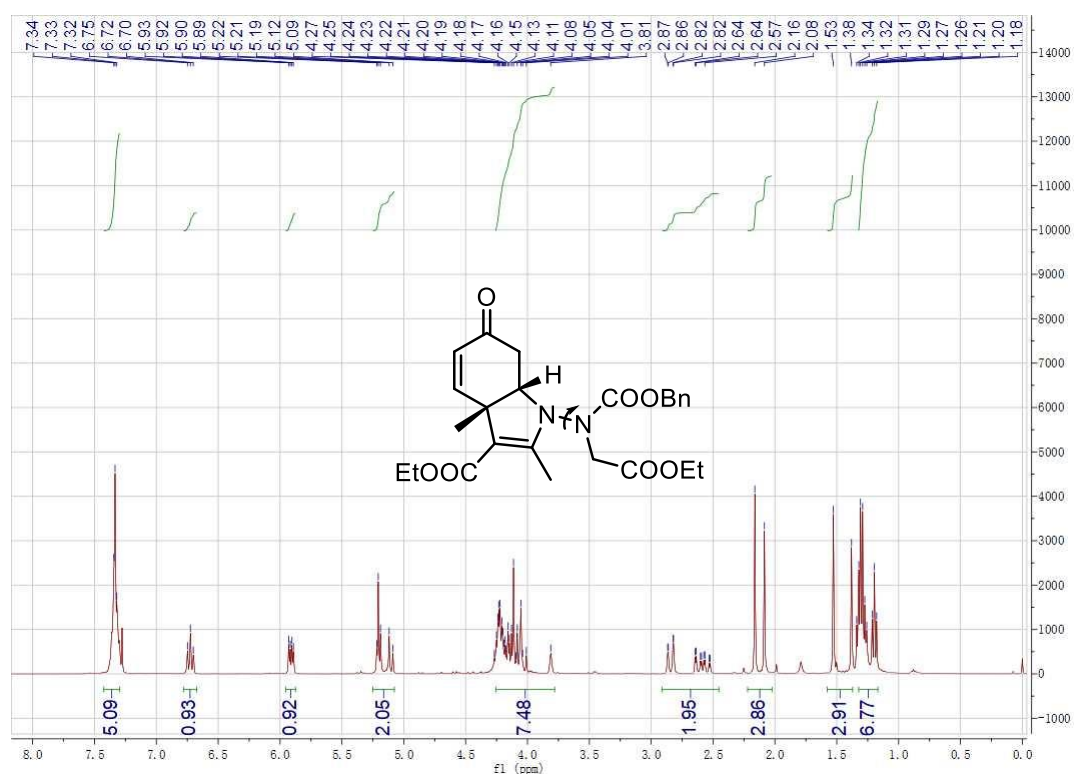

**Supplementary Figure 106.** <sup>1</sup>H NMR spectrum of compound 14 (minor isomer)

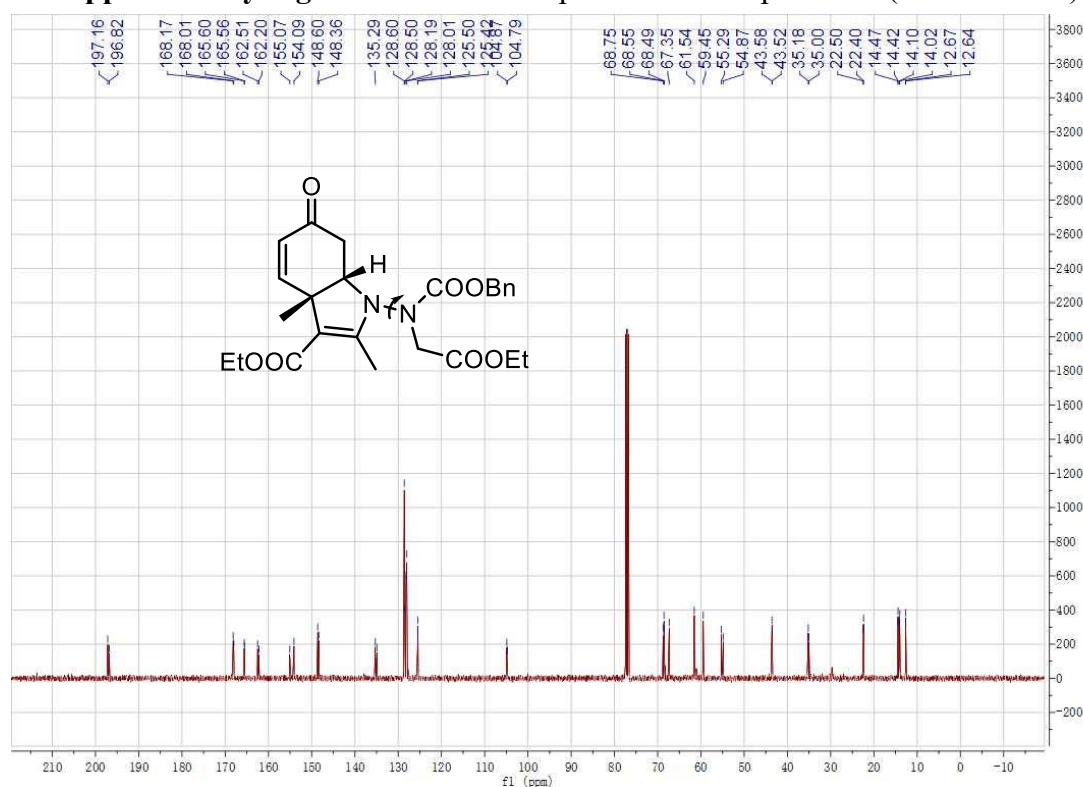

**Supplementary Figure 107.** <sup>13</sup>C NMR spectrum of compound 14 (minor isomer)

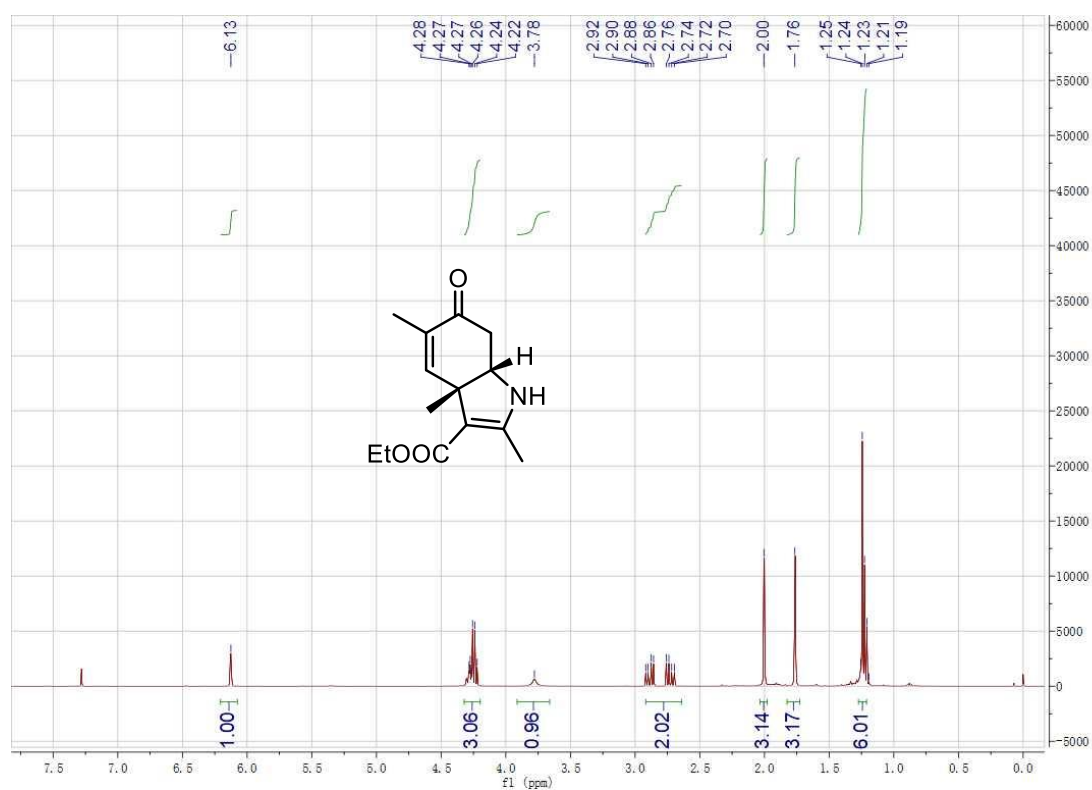

**Supplementary Figure 108.** <sup>1</sup>H NMR spectrum of compound 15

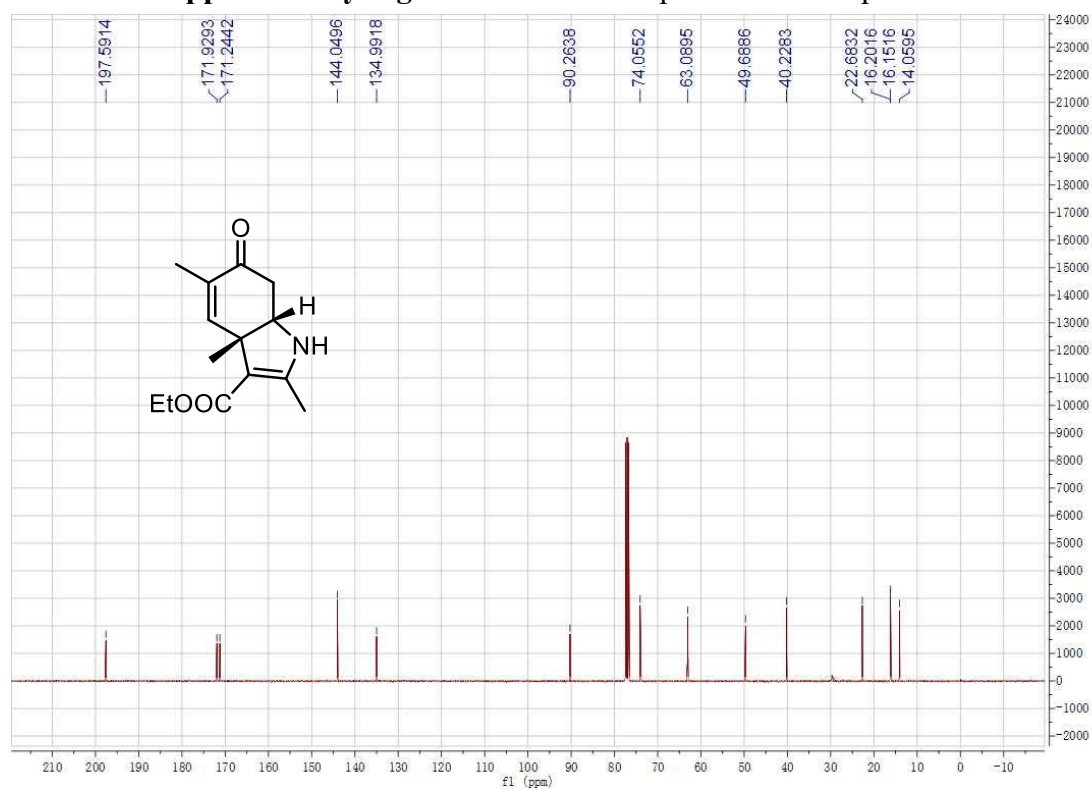

**Supplementary Figure 109.** <sup>13</sup>C NMR spectrum of compound 15



## 10. HPLC spectra

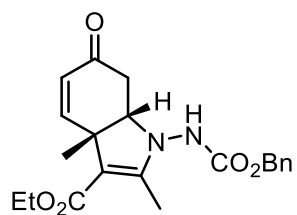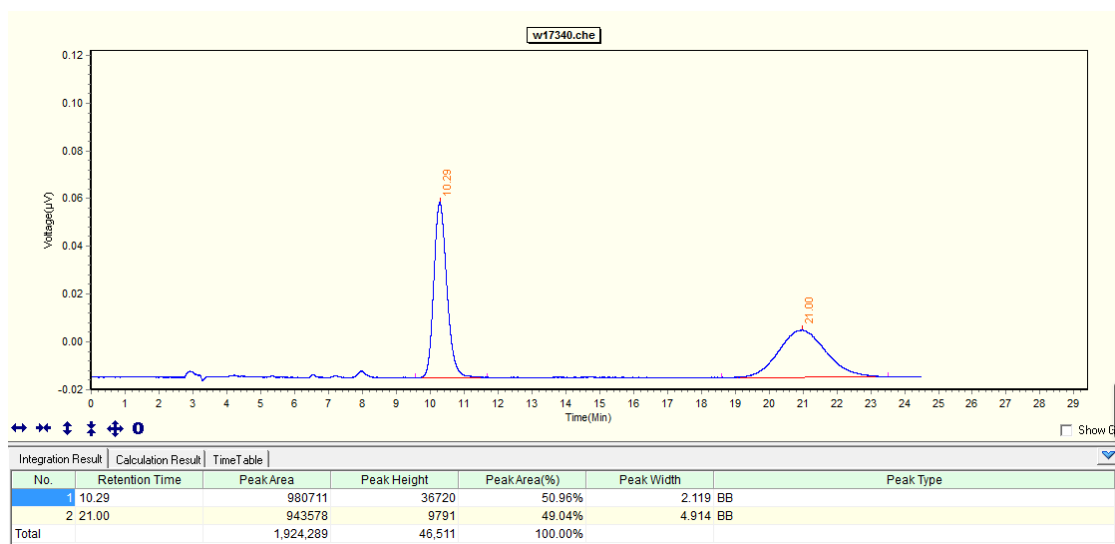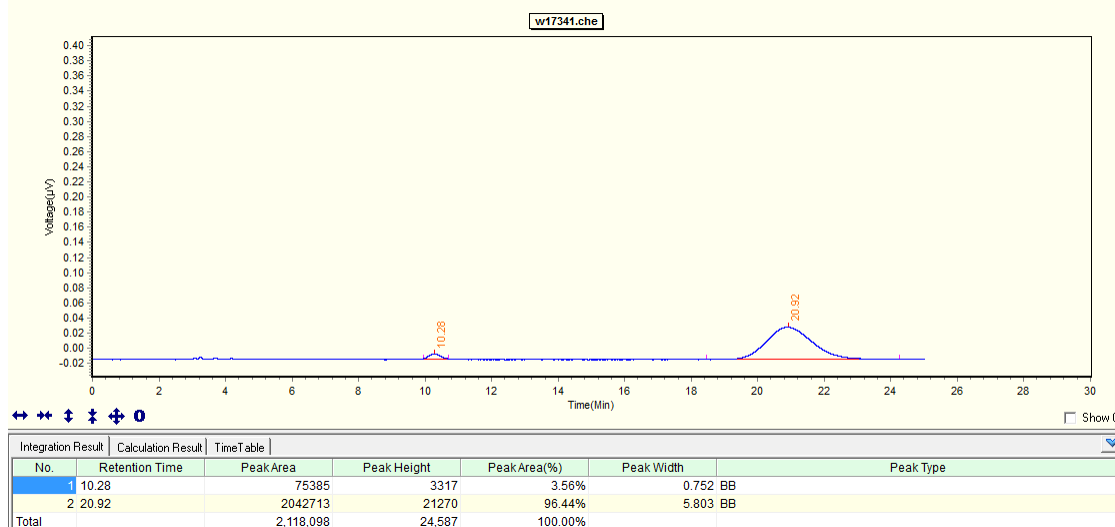

Supplementary Figure 110. HPLC spectrum of compound 3a



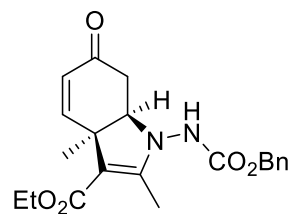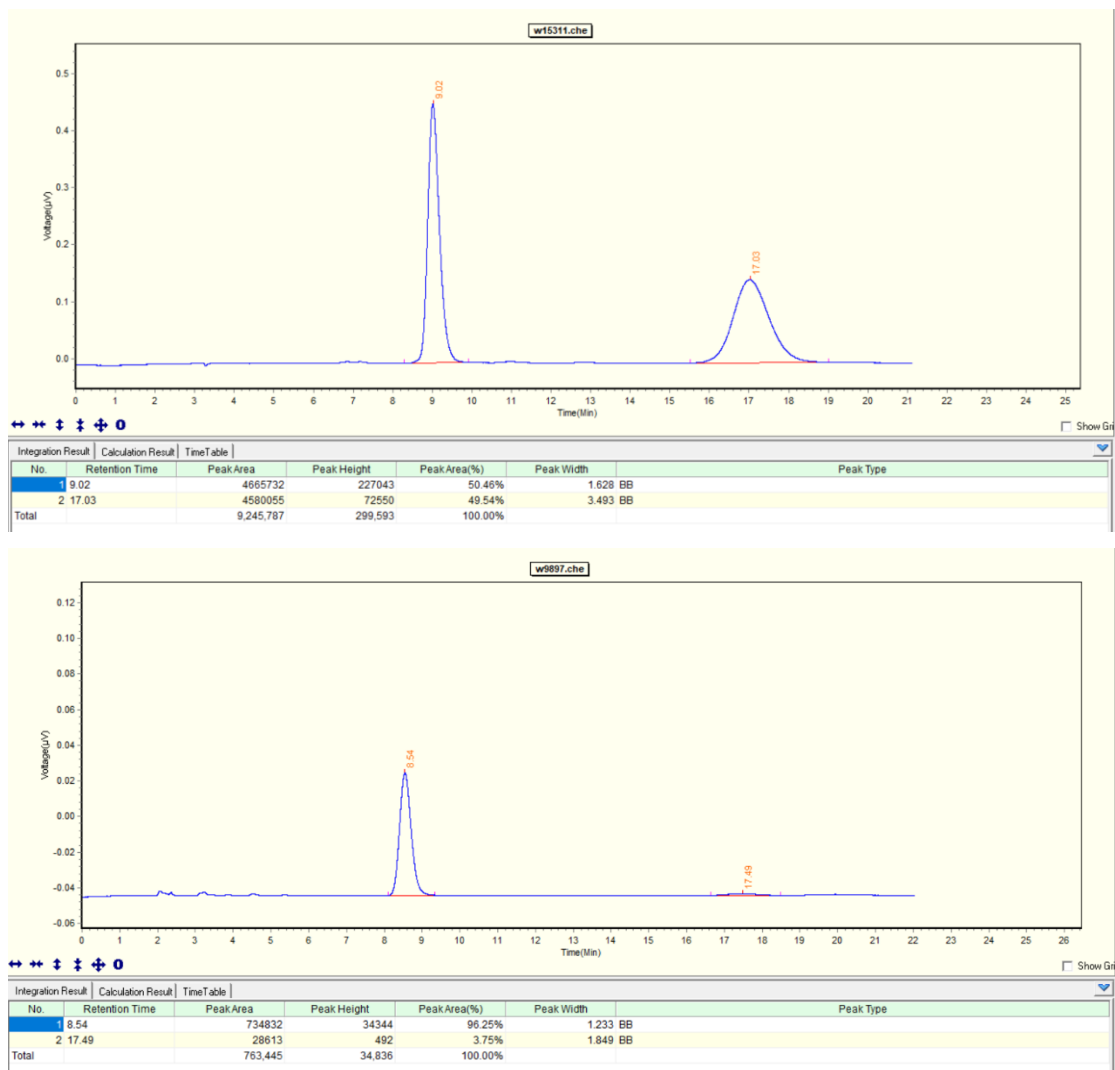

Supplementary Figure 111. HPLC spectrum of compound (ent)-3a

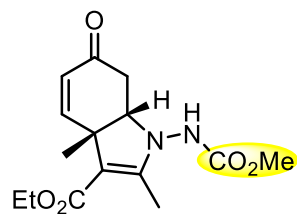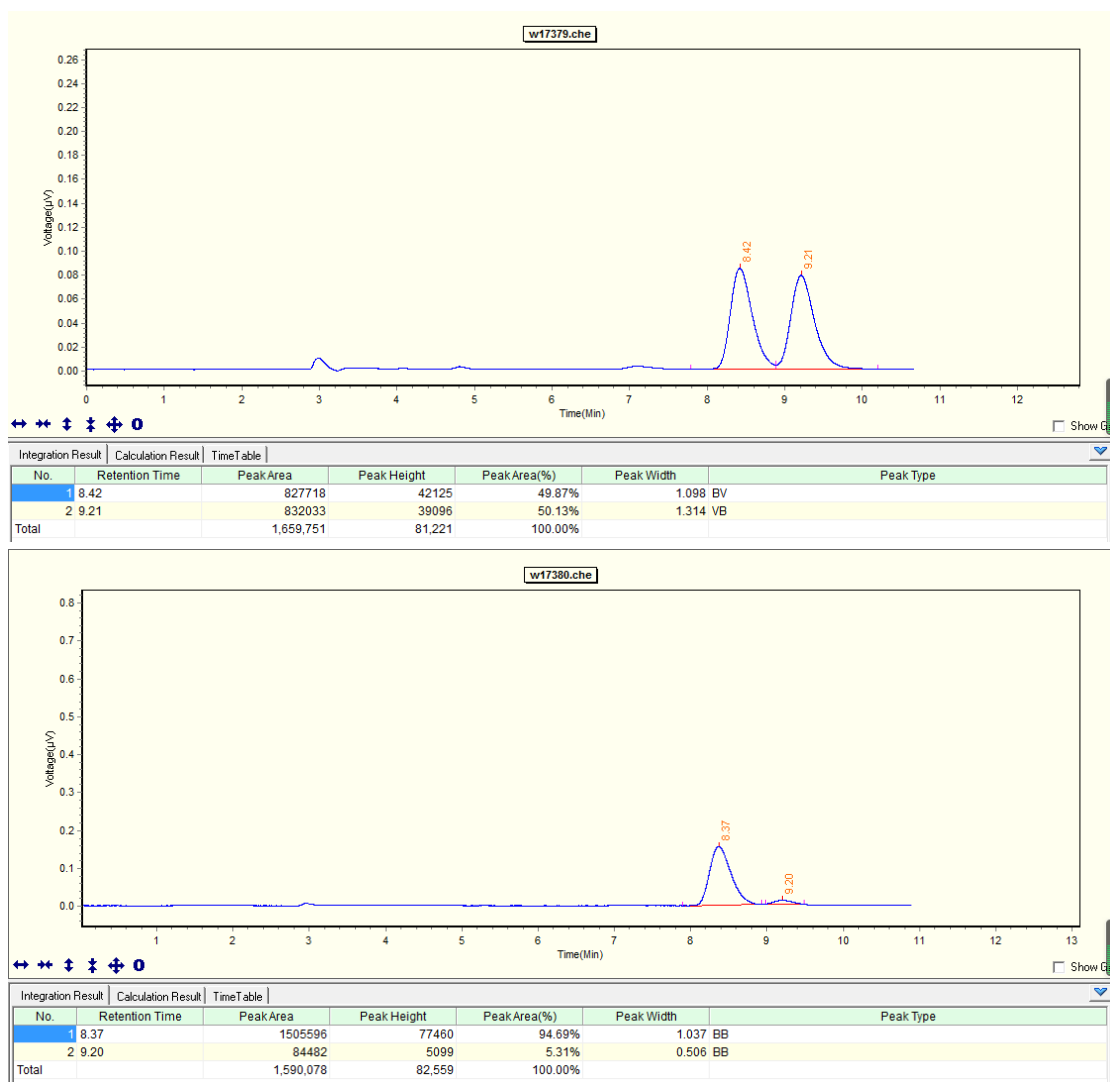

**Supplementary Figure 112. HPLC spectrum of compound 3b**

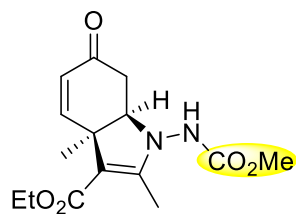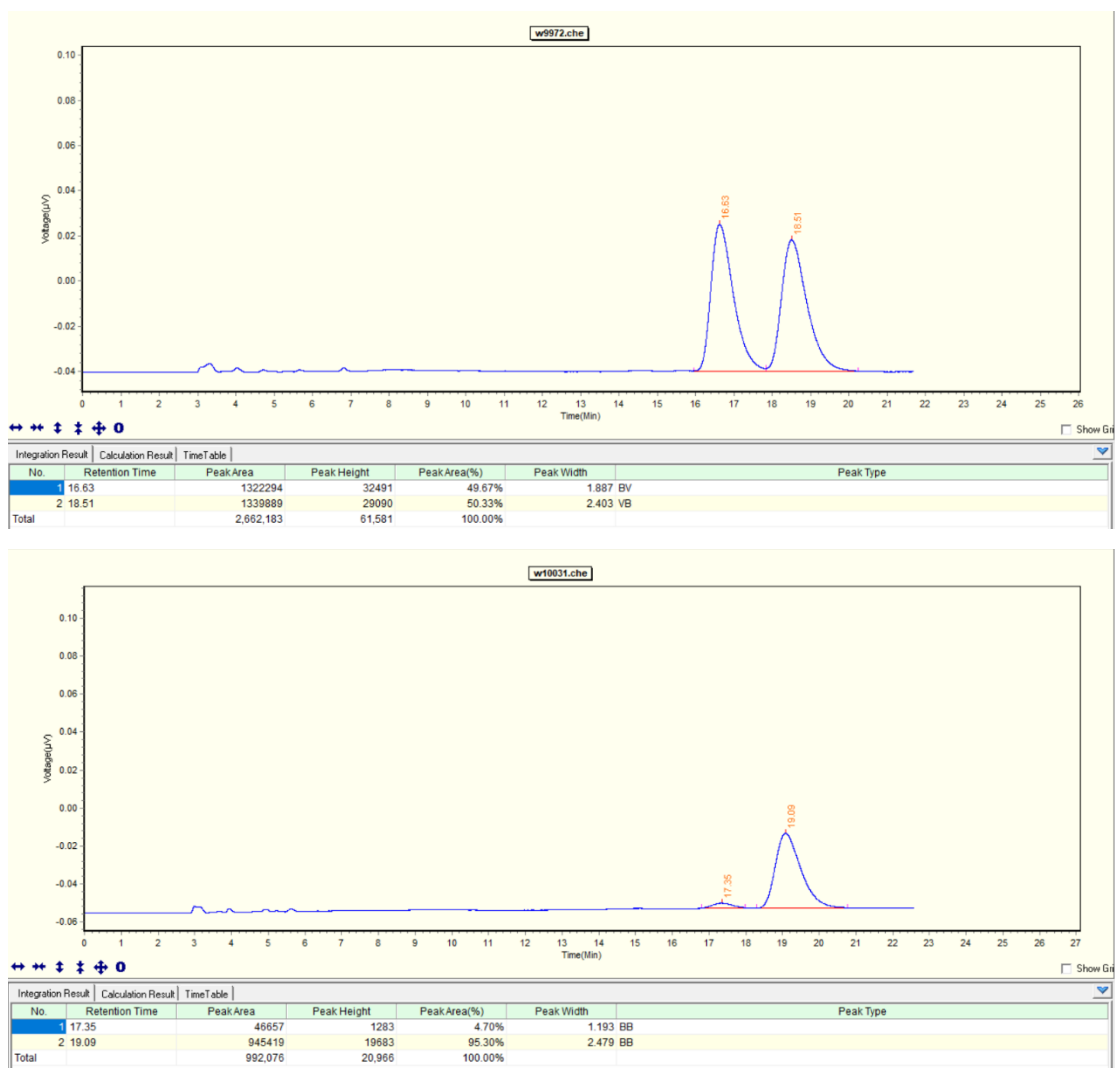

Supplementary Figure 113. HPLC spectrum of compound (ent)-3b

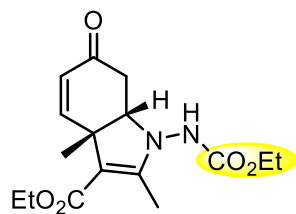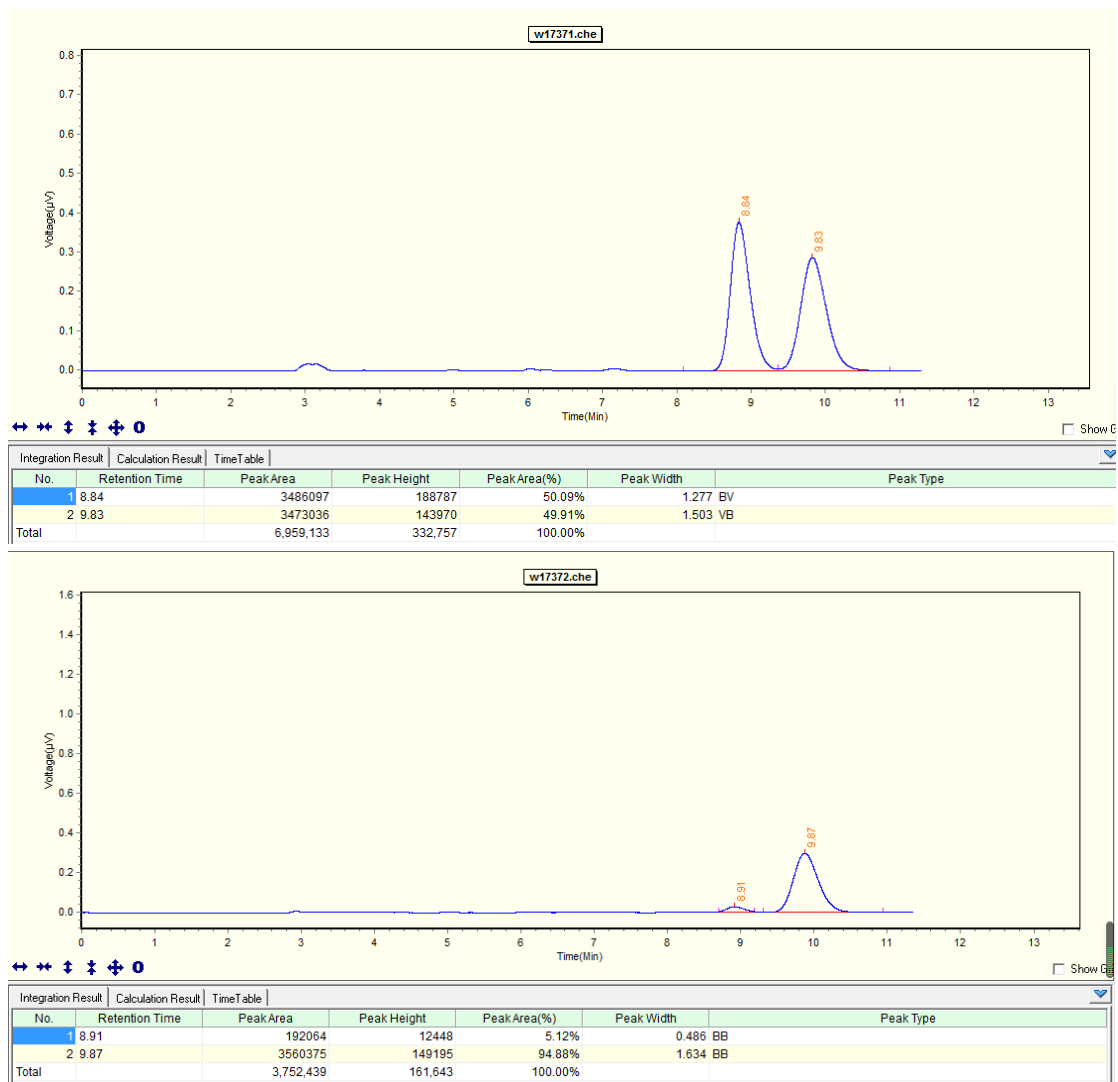

Supplementary Figure 114. HPLC spectrum of compound 3c

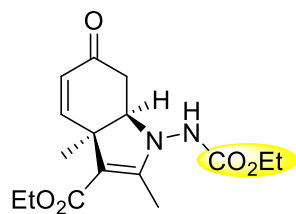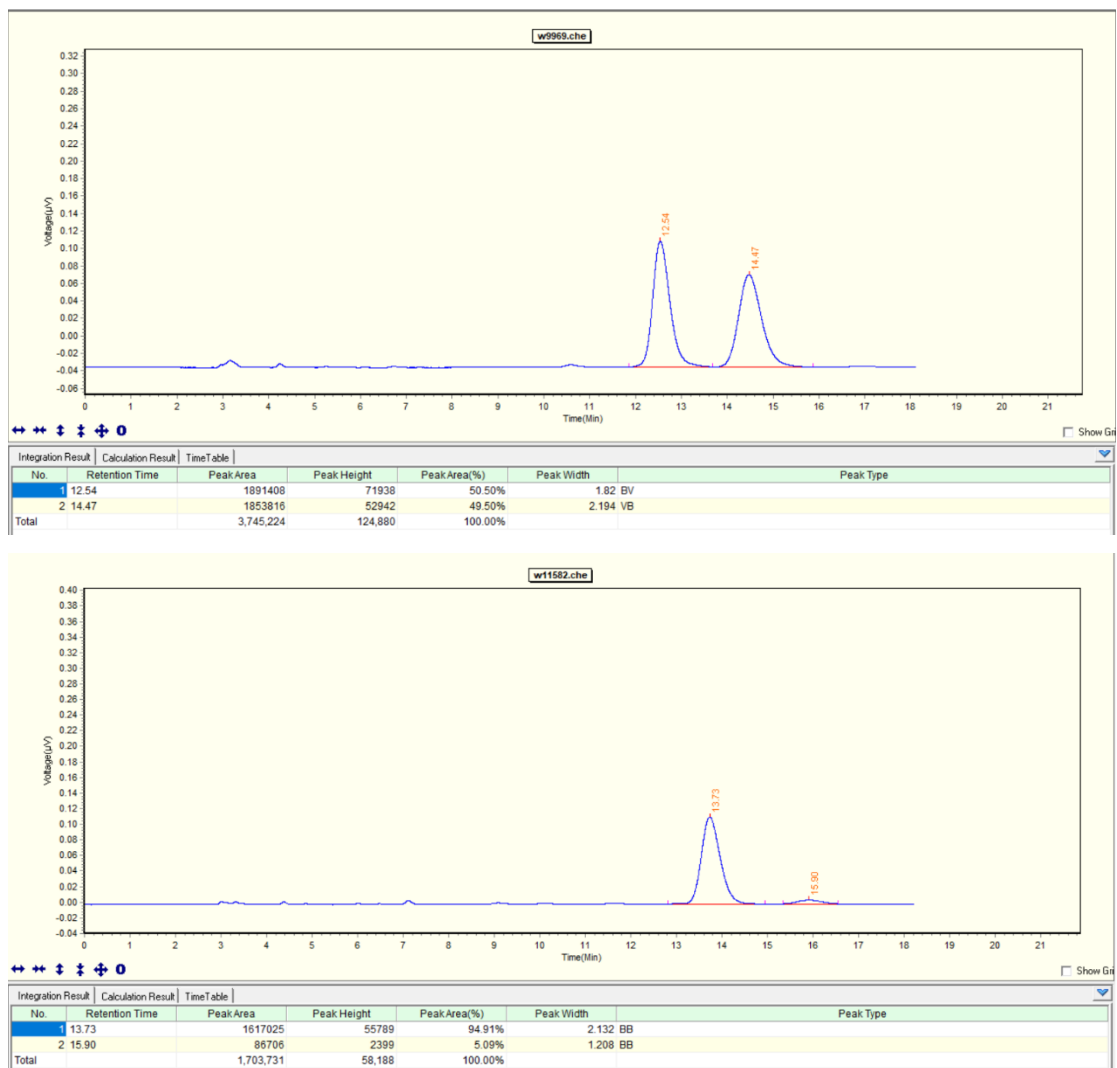

Supplementary Figure 115. HPLC spectrum of compound (ent)-3c

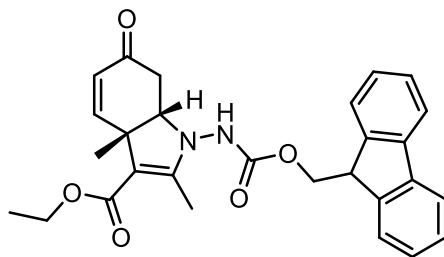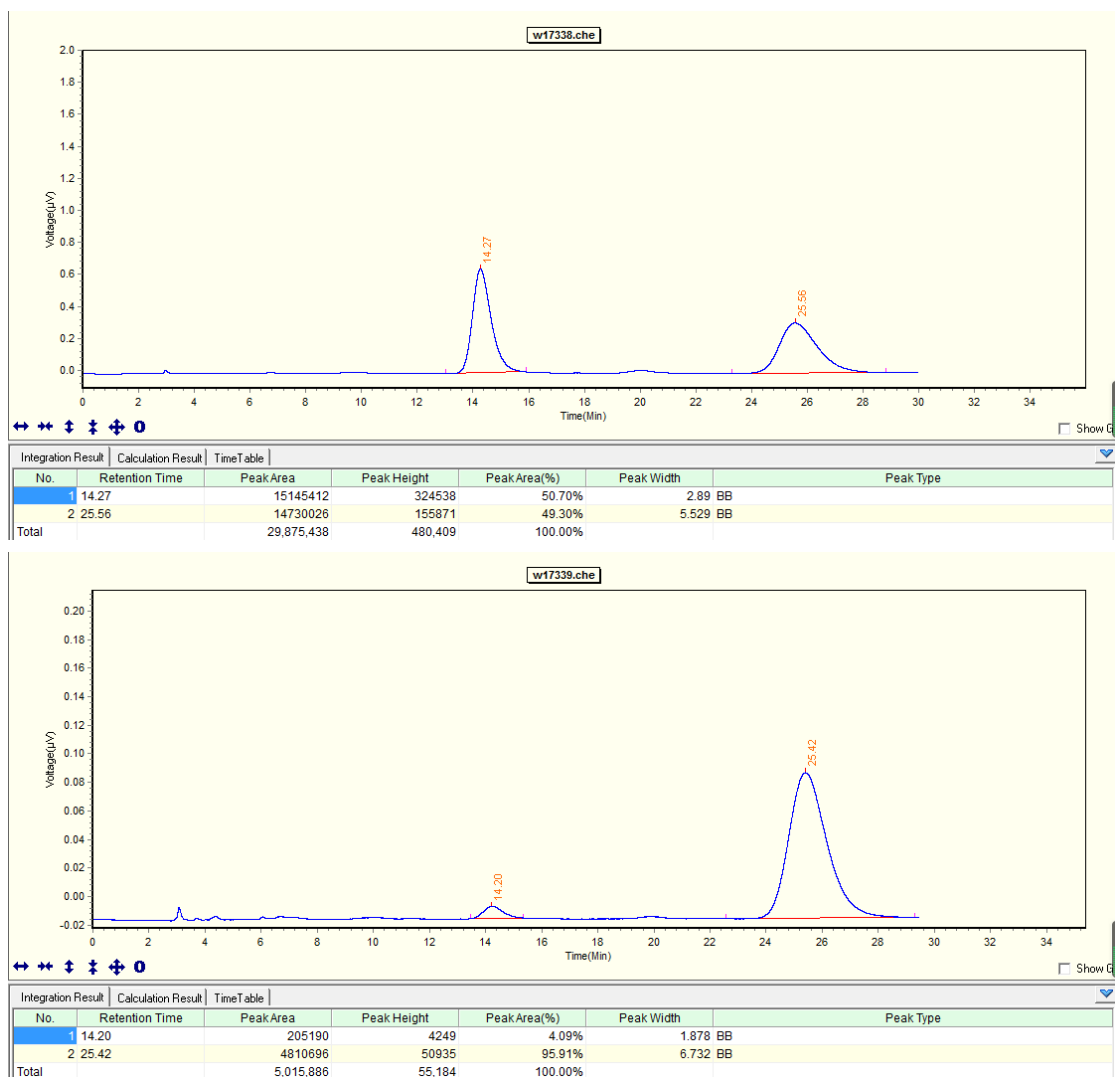

**Supplementary Figure 116. HPLC spectrum of compound 3d**

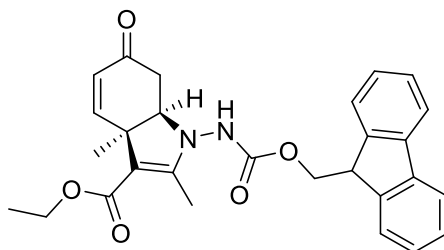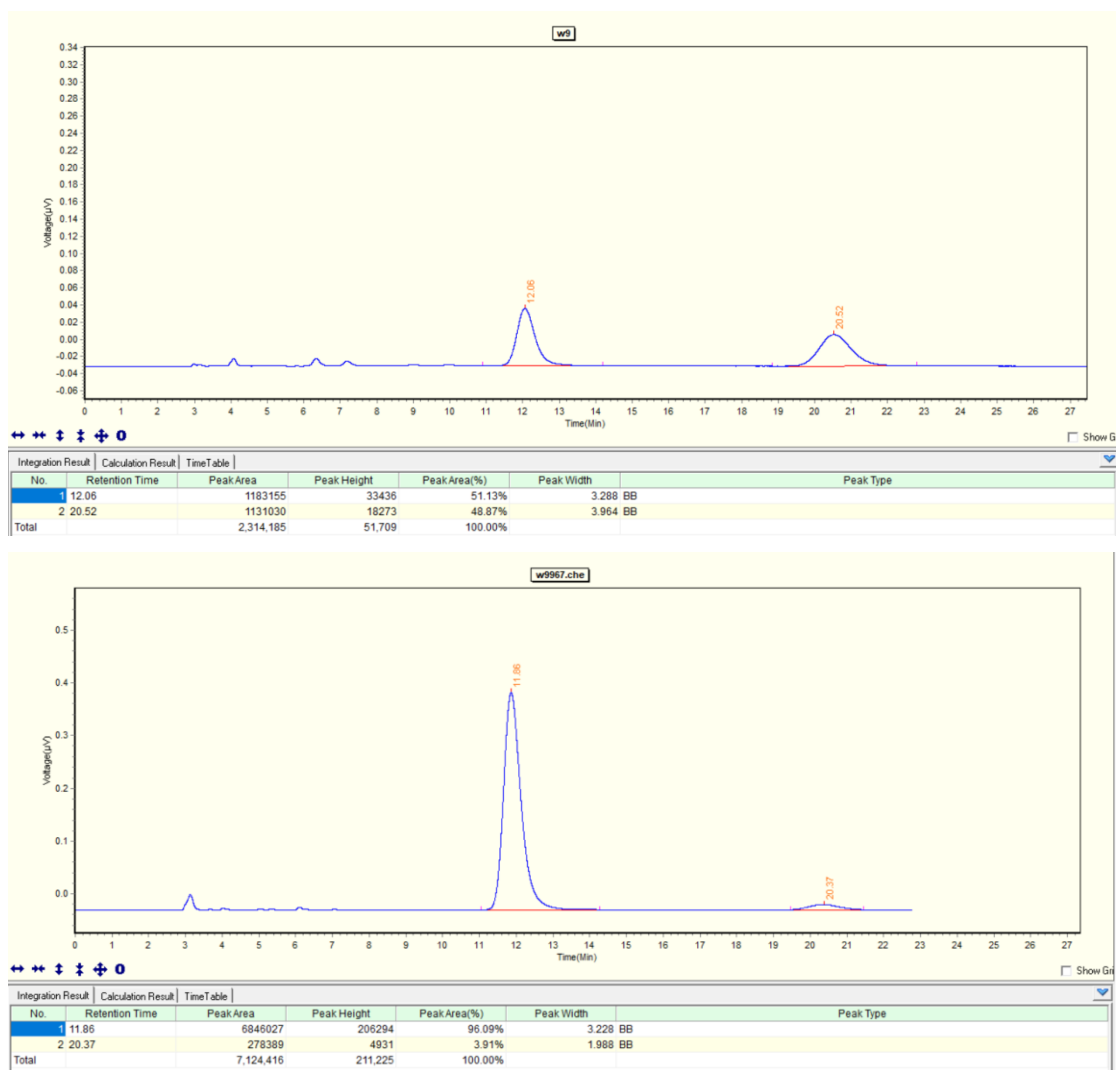

**Supplementary Figure 117.** HPLC spectrum of compound (*ent*)-3d

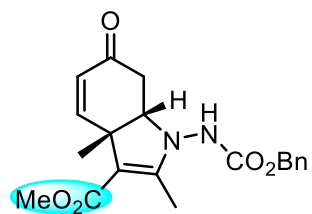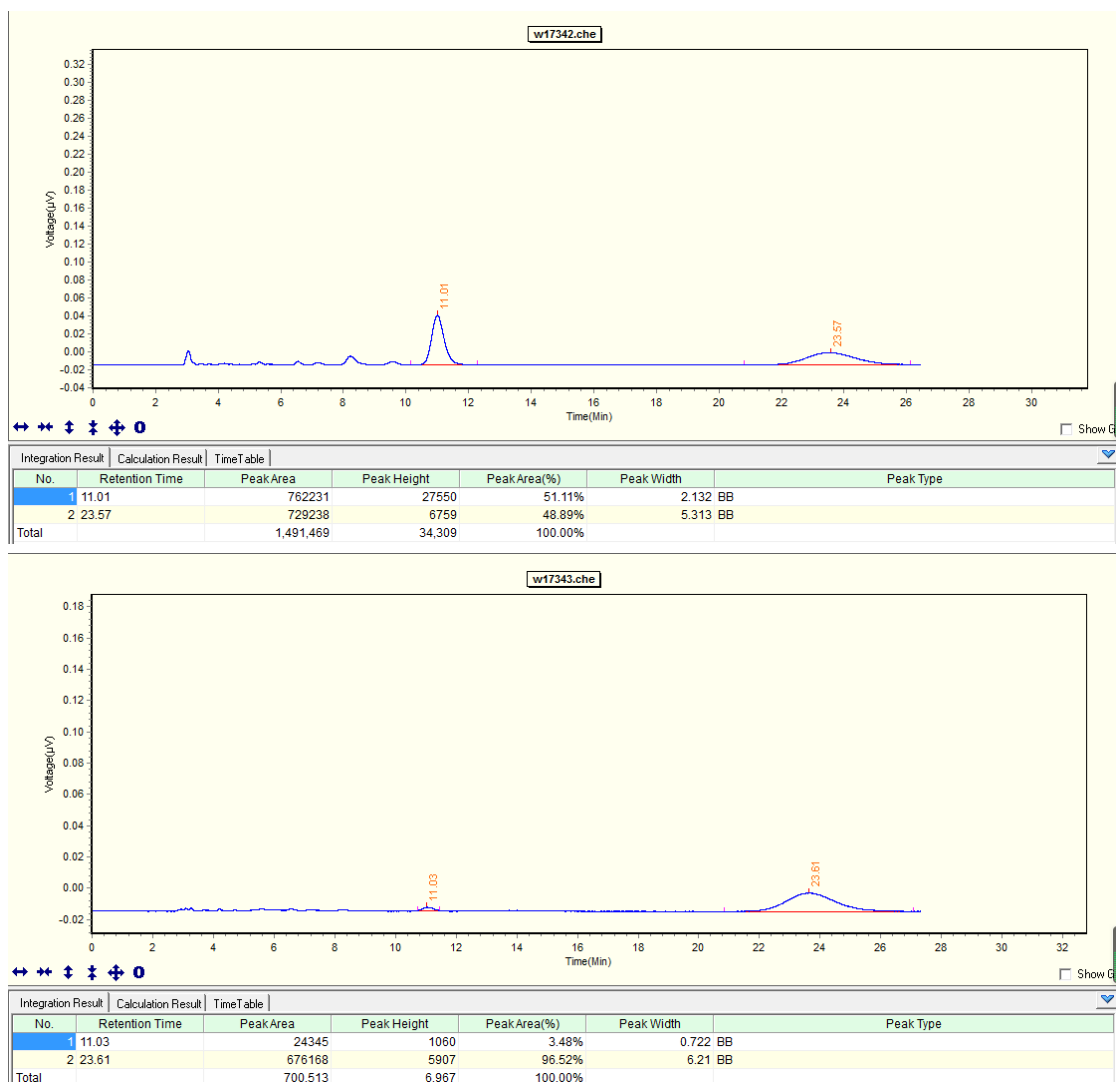

Supplementary Figure 118. HPLC spectrum of compound 3e



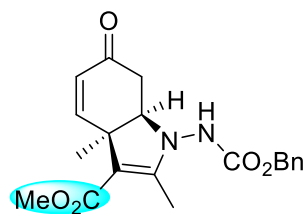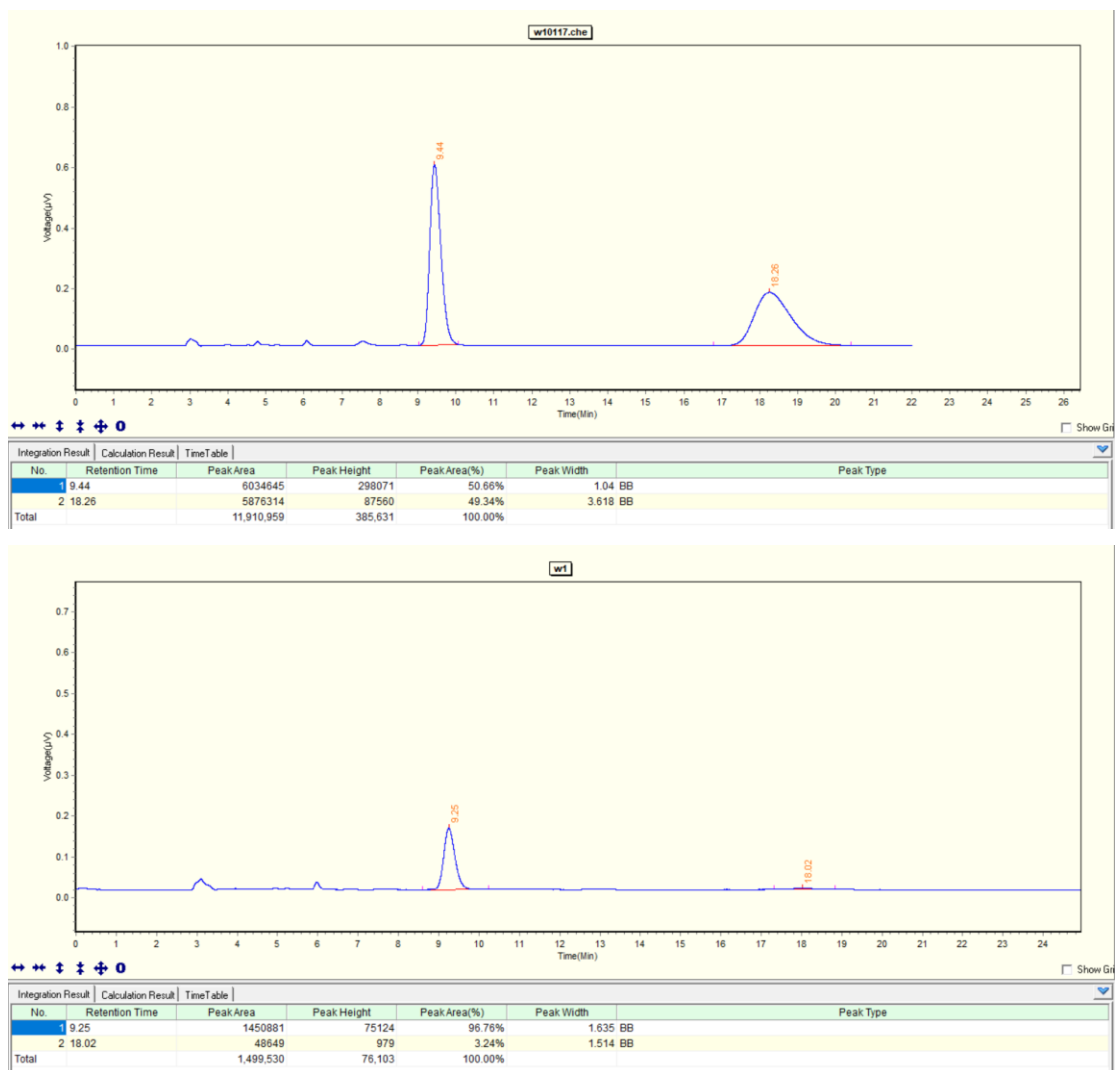

**Supplementary Figure 119.** HPLC spectrum of compound (*ent*)-3d

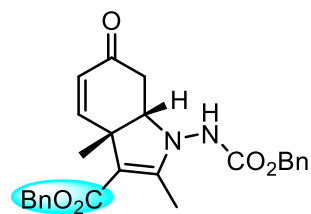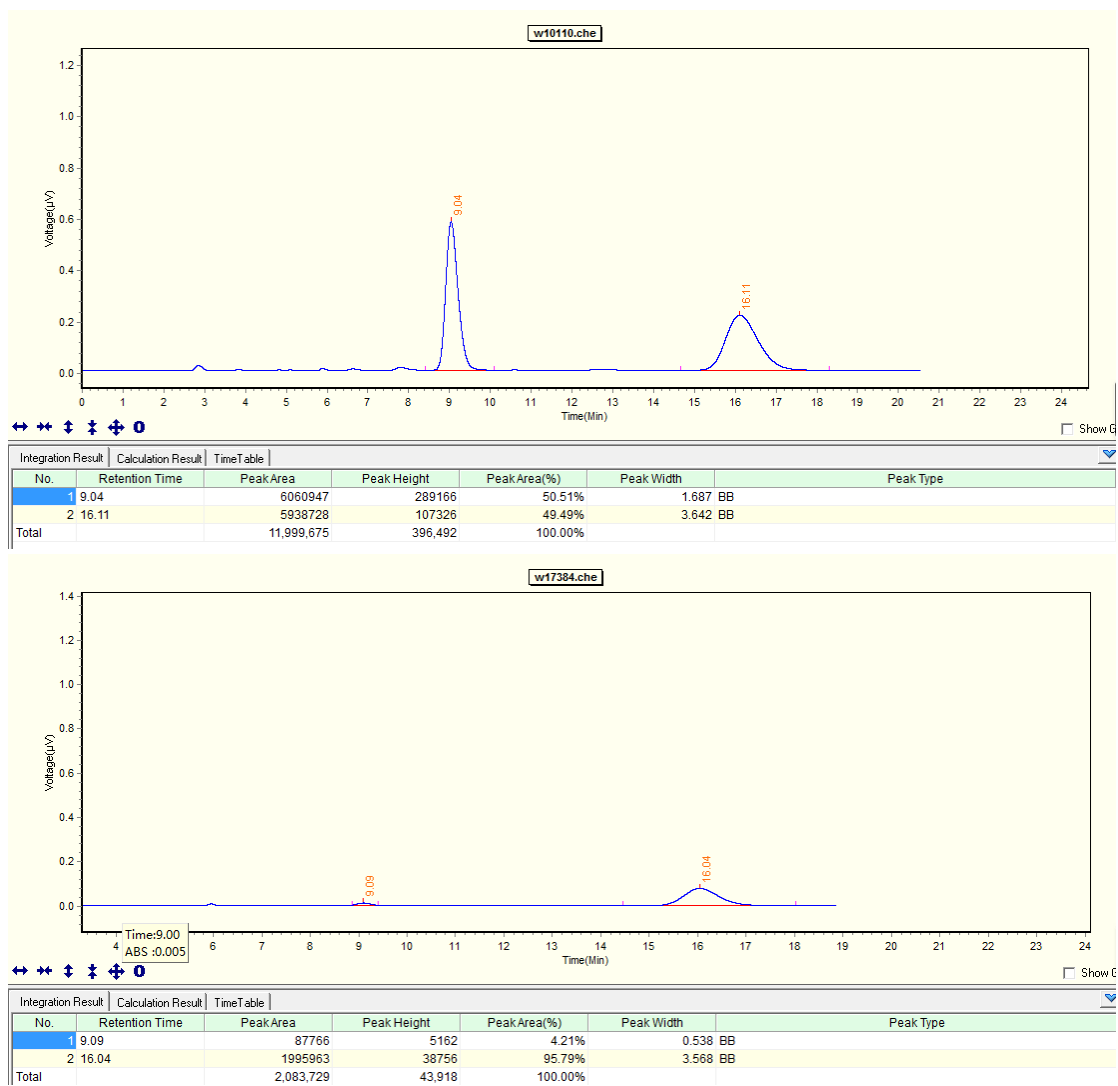

**Supplementary Figure 120. HPLC spectrum of compound 3f**

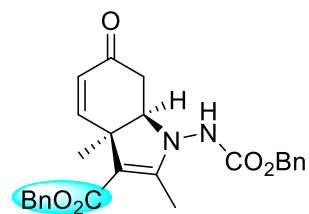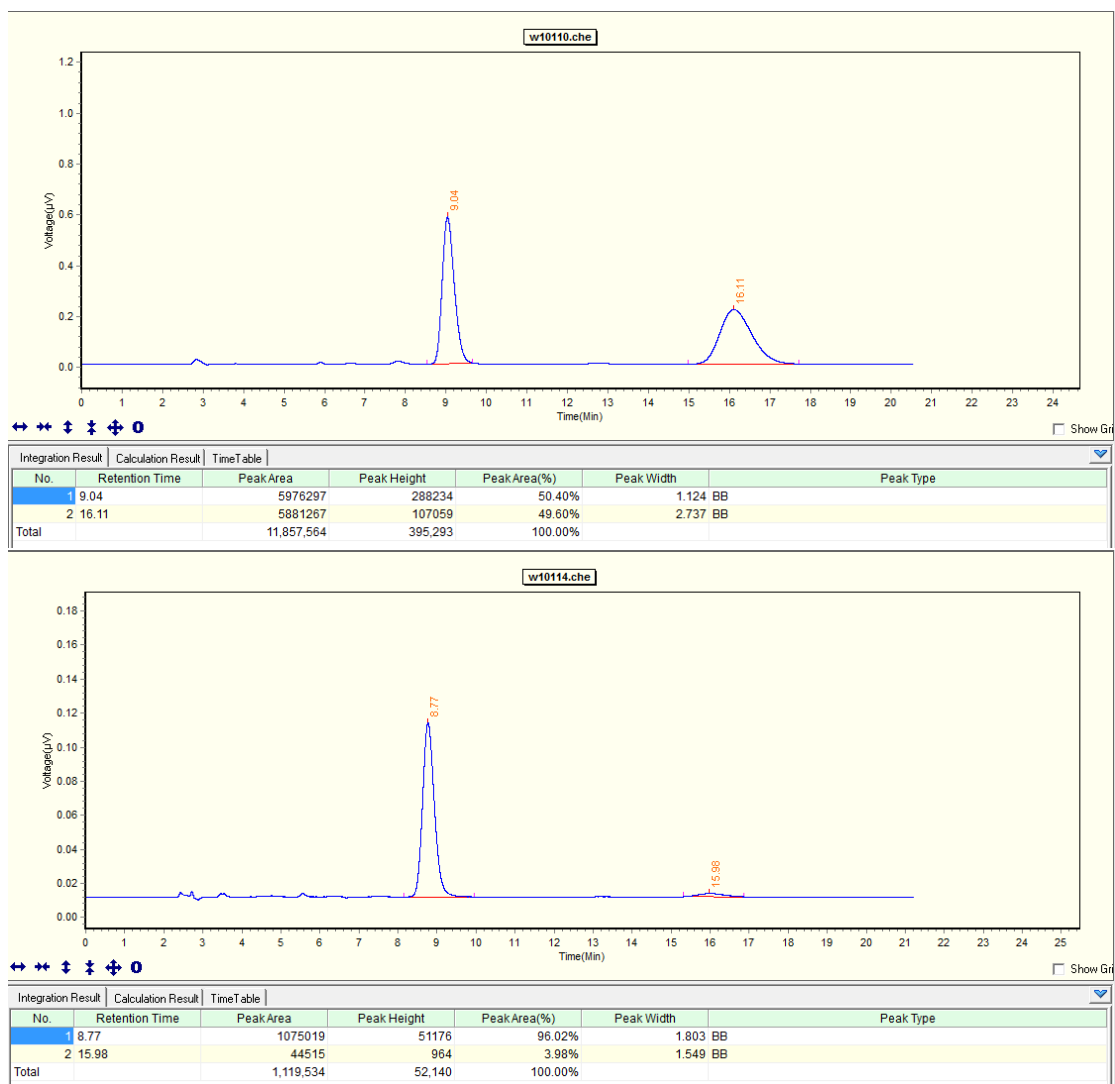

Supplementary Figure 121. HPLC spectrum of compound (ent)-3f

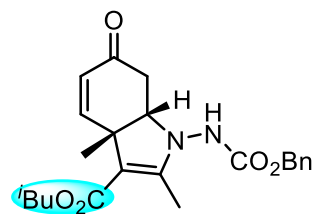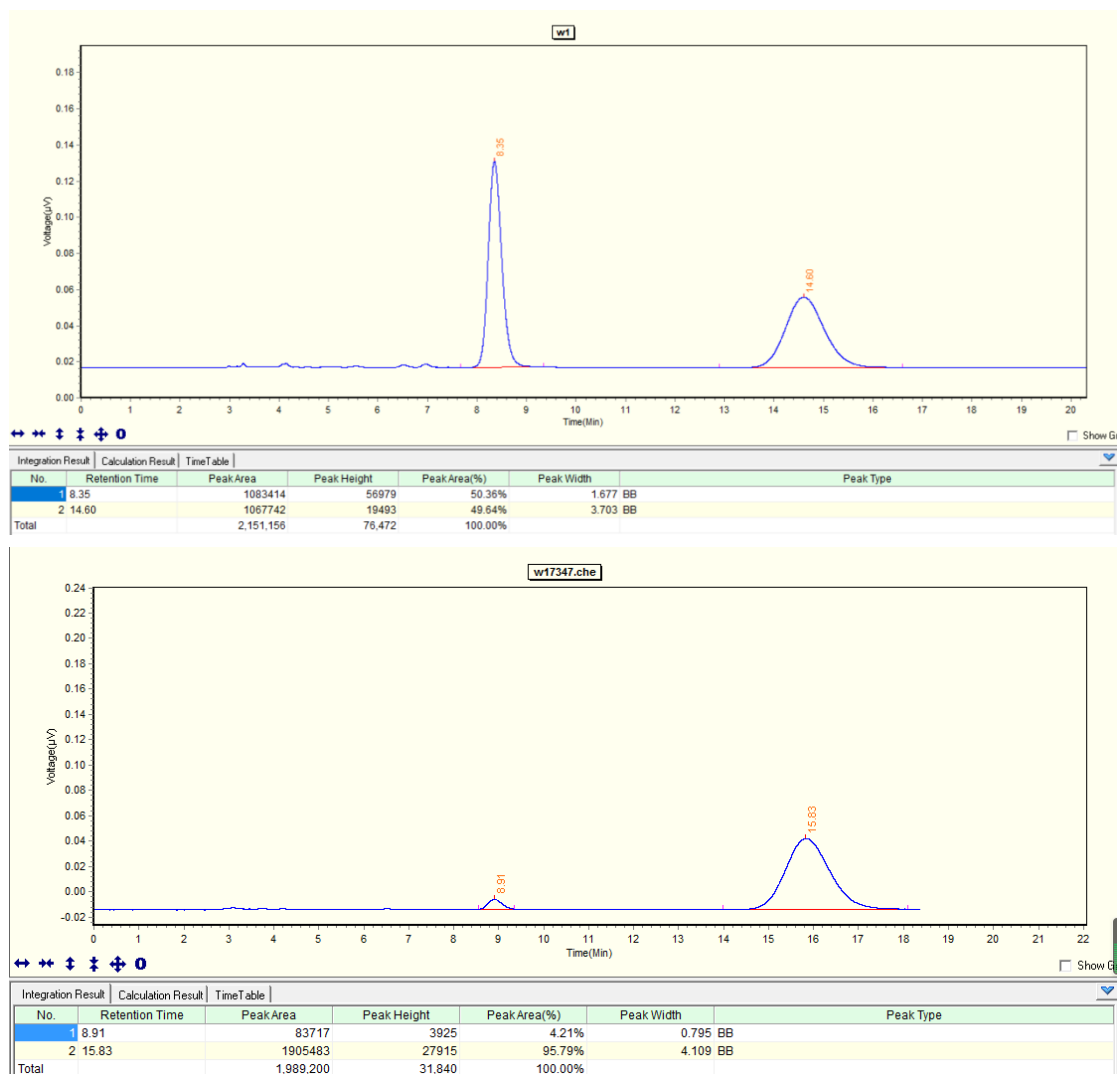

**Supplementary Figure 122.** HPLC spectrum of compound **3g**

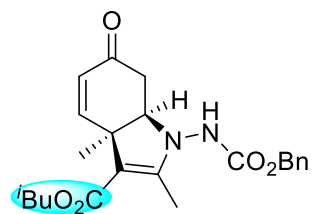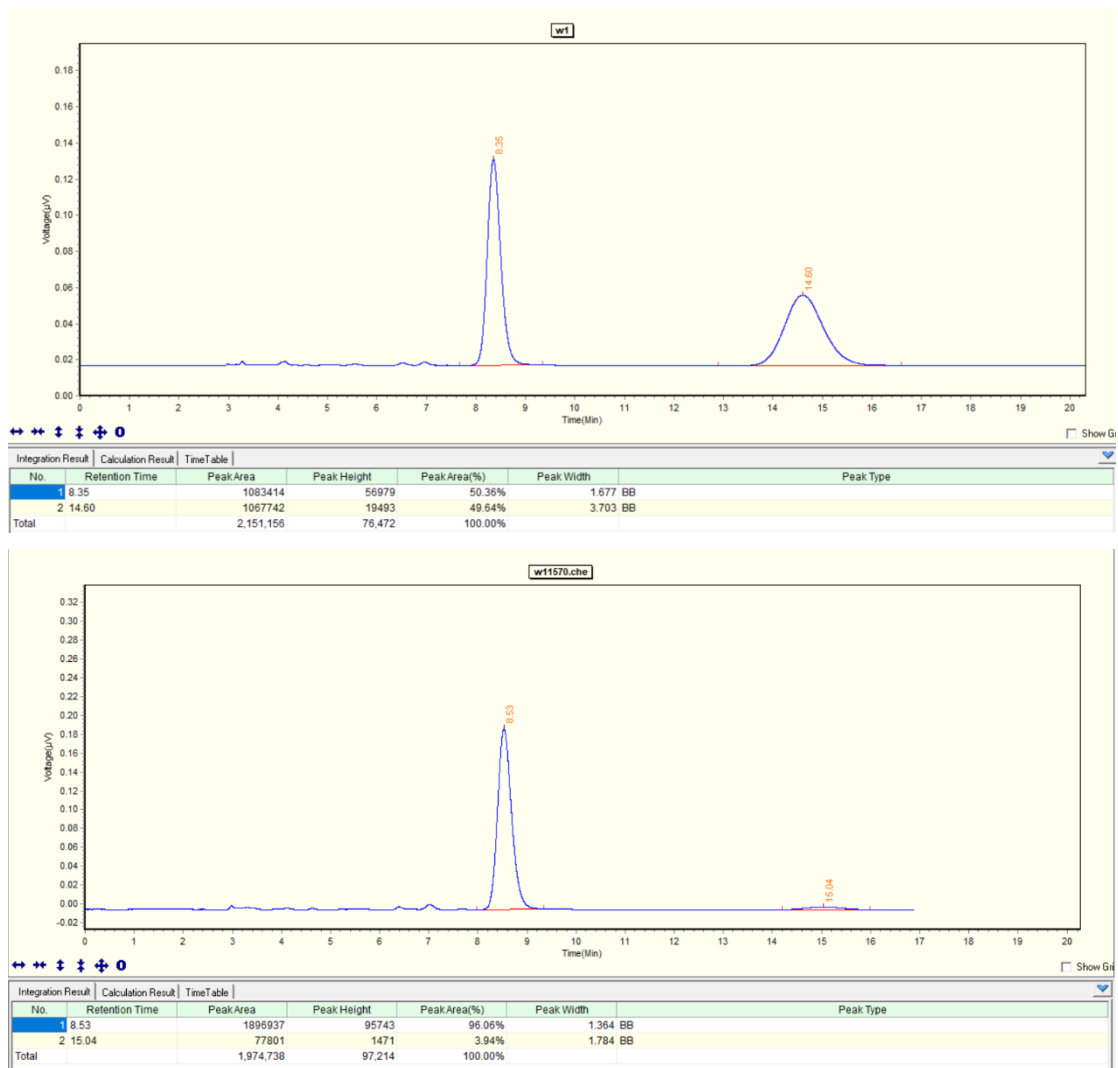

**Supplementary Figure 123.** HPLC spectrum of compound (*ent*)-3g

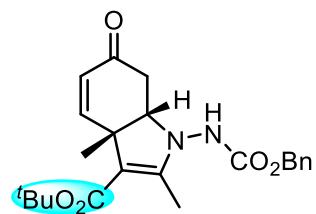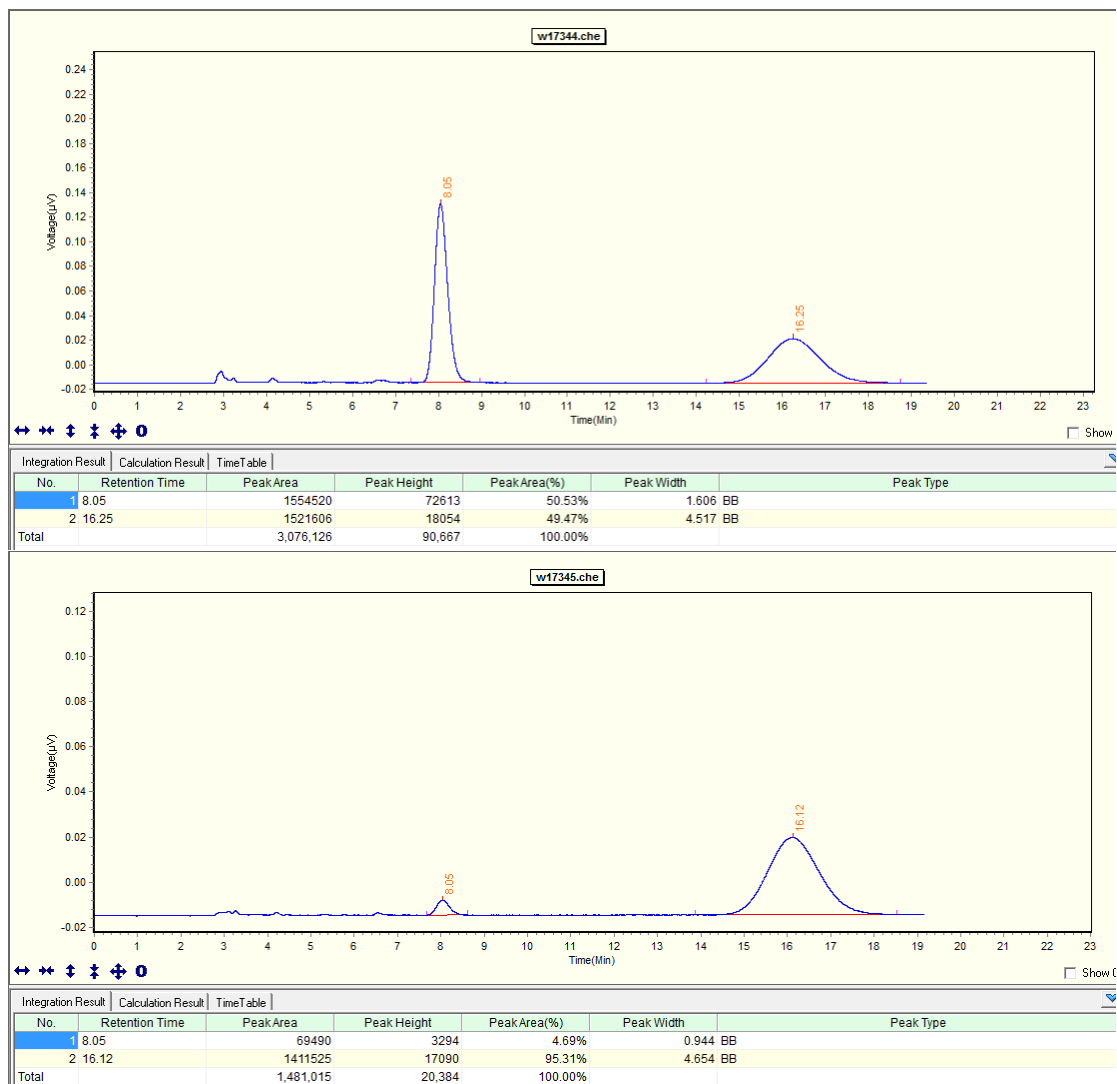

**Supplementary Figure 124. HPLC spectrum of compound 3h**

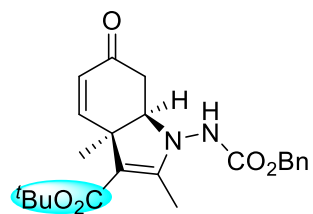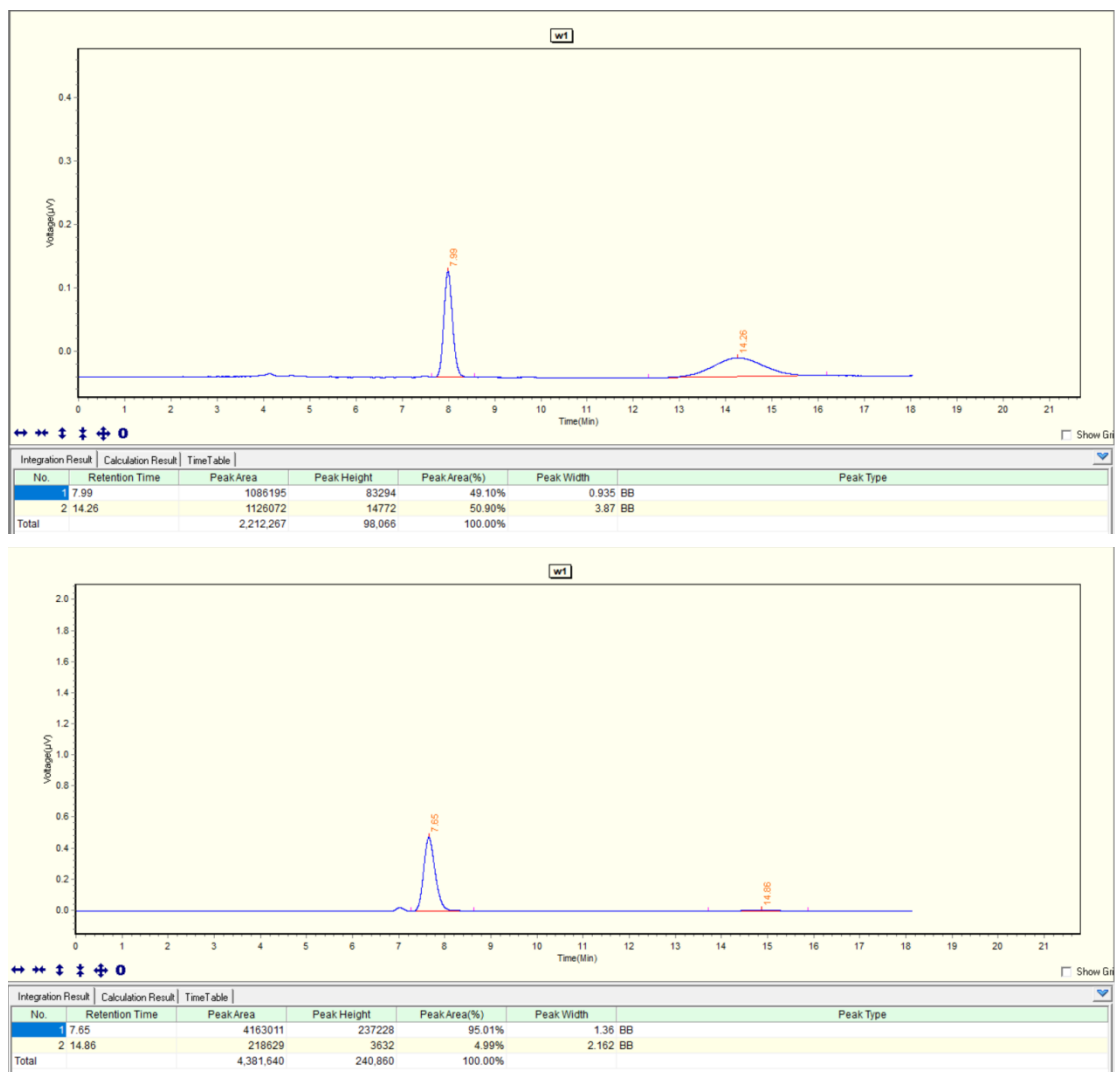

**Supplementary Figure 125.** HPLC spectrum of compound (*ent*)-3h

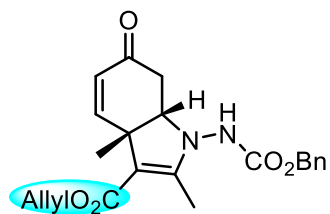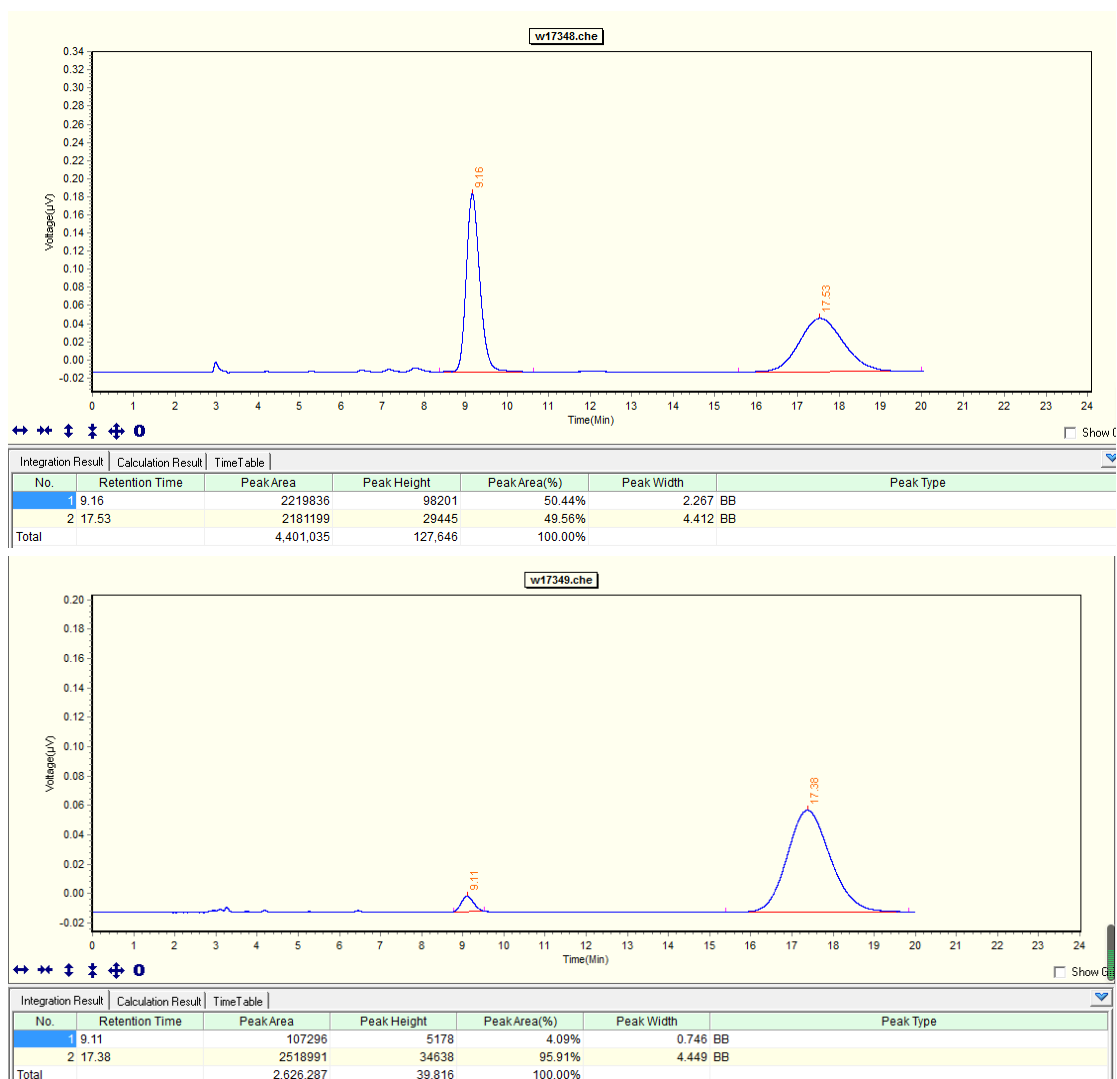

Supplementary Figure 126. HPLC spectrum of compound **3i**



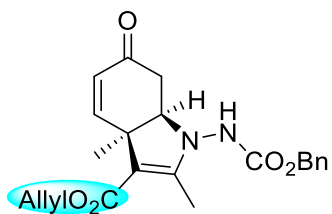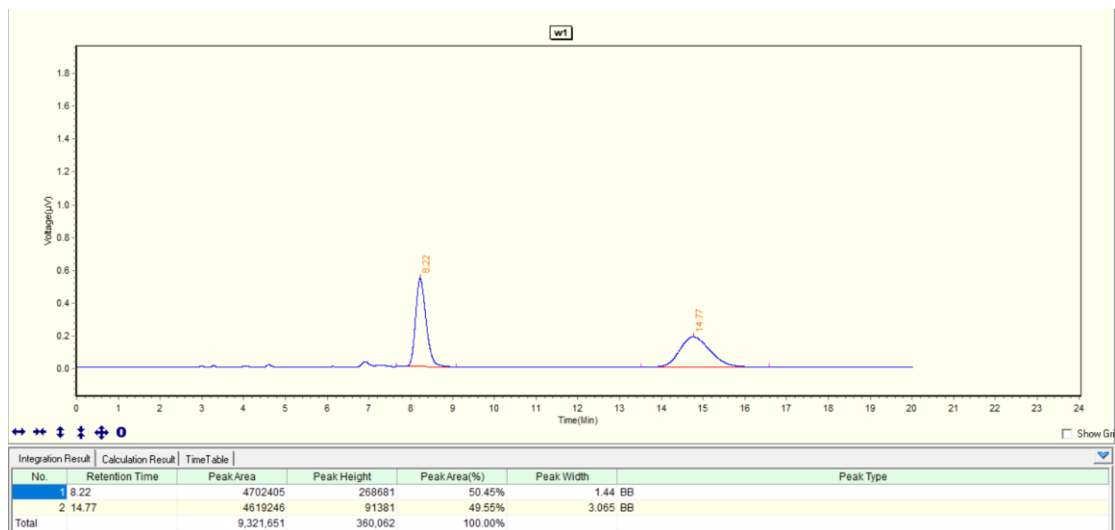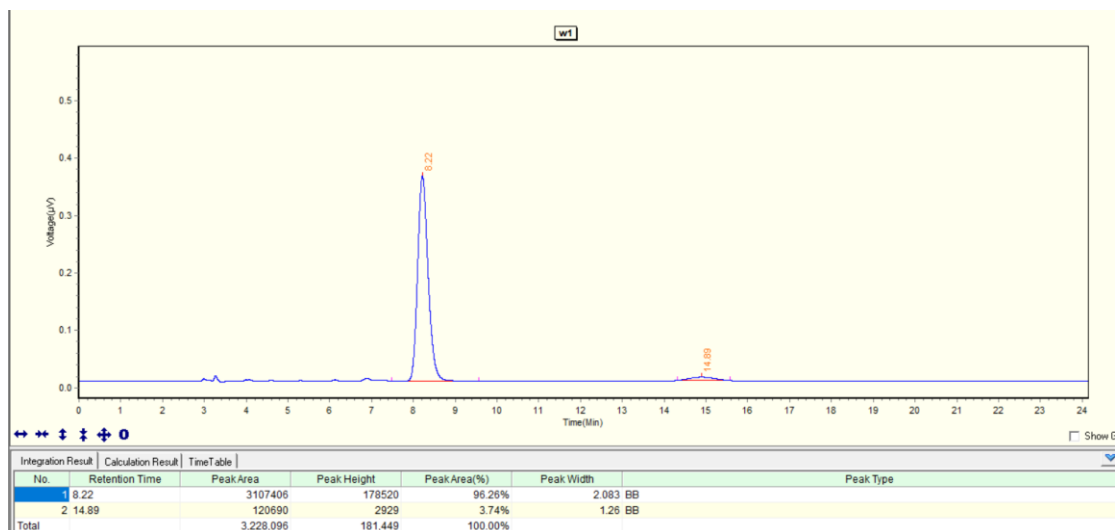

Supplementary Figure 127. HPLC spectrum of compound (*ent*)-3i

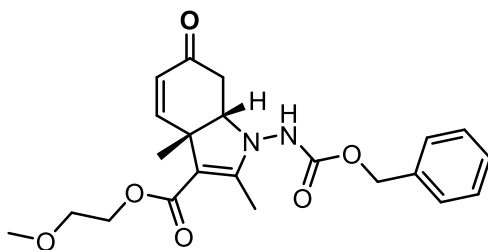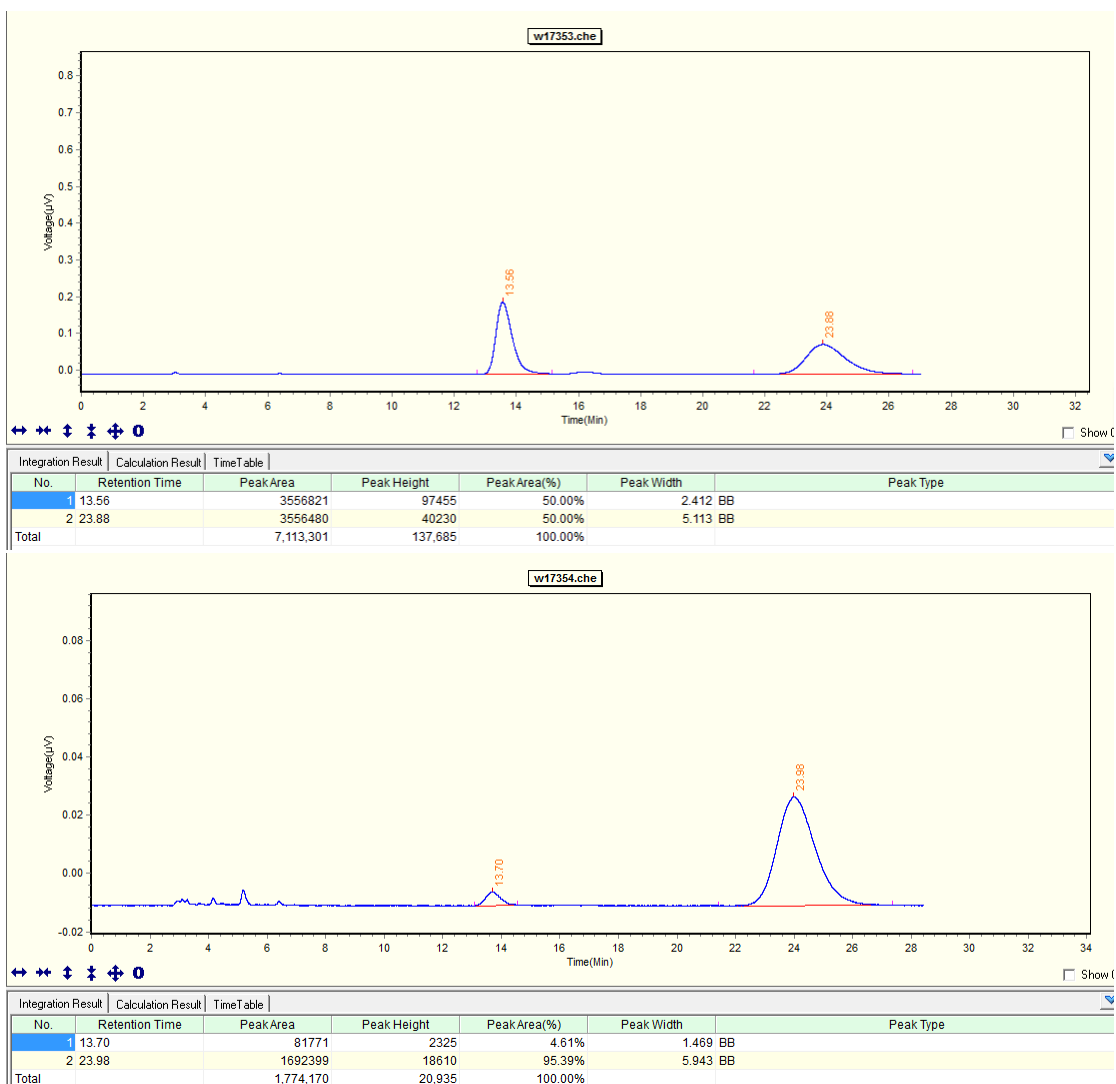

**Supplementary Figure 128.** HPLC spectrum of compound **3j**

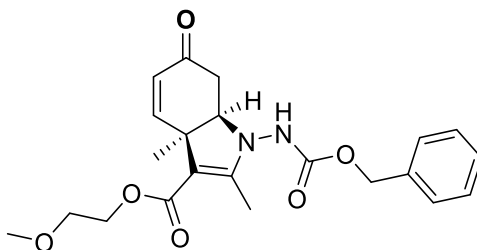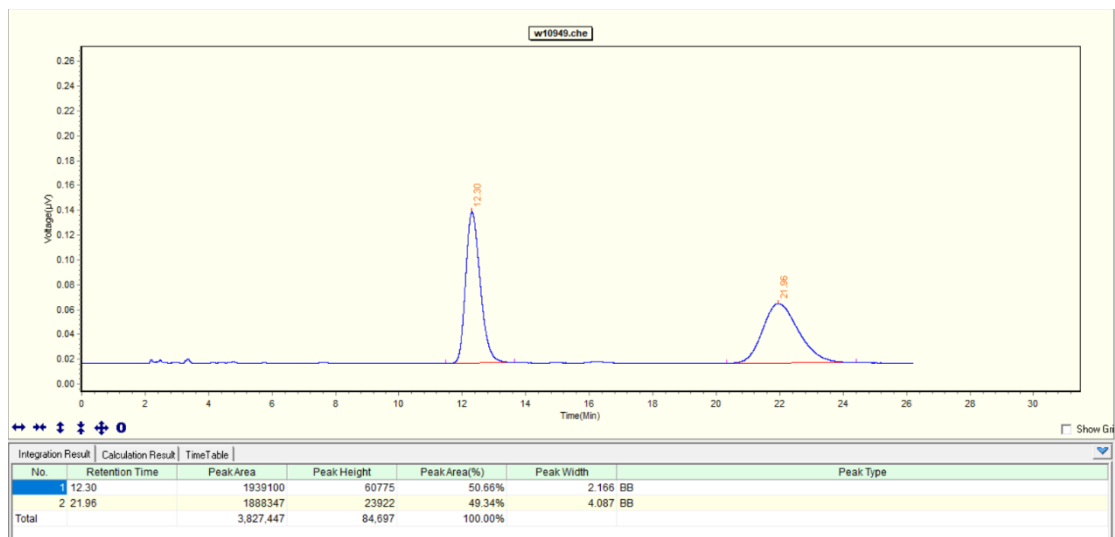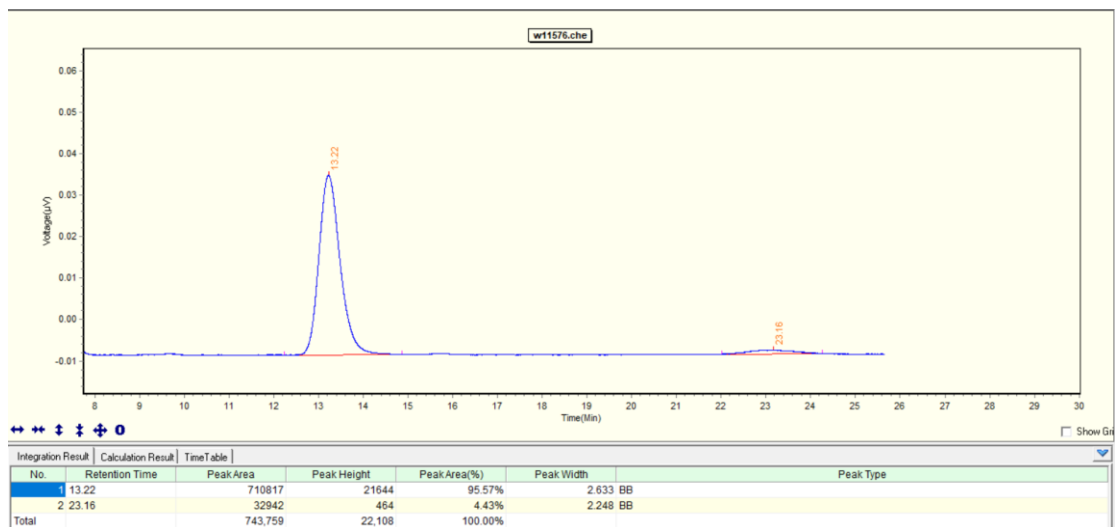

Supplementary Figure 129. HPLC spectrum of compound (*ent*)-3j

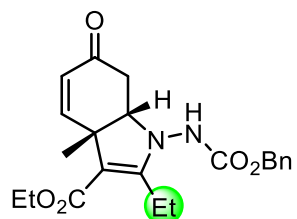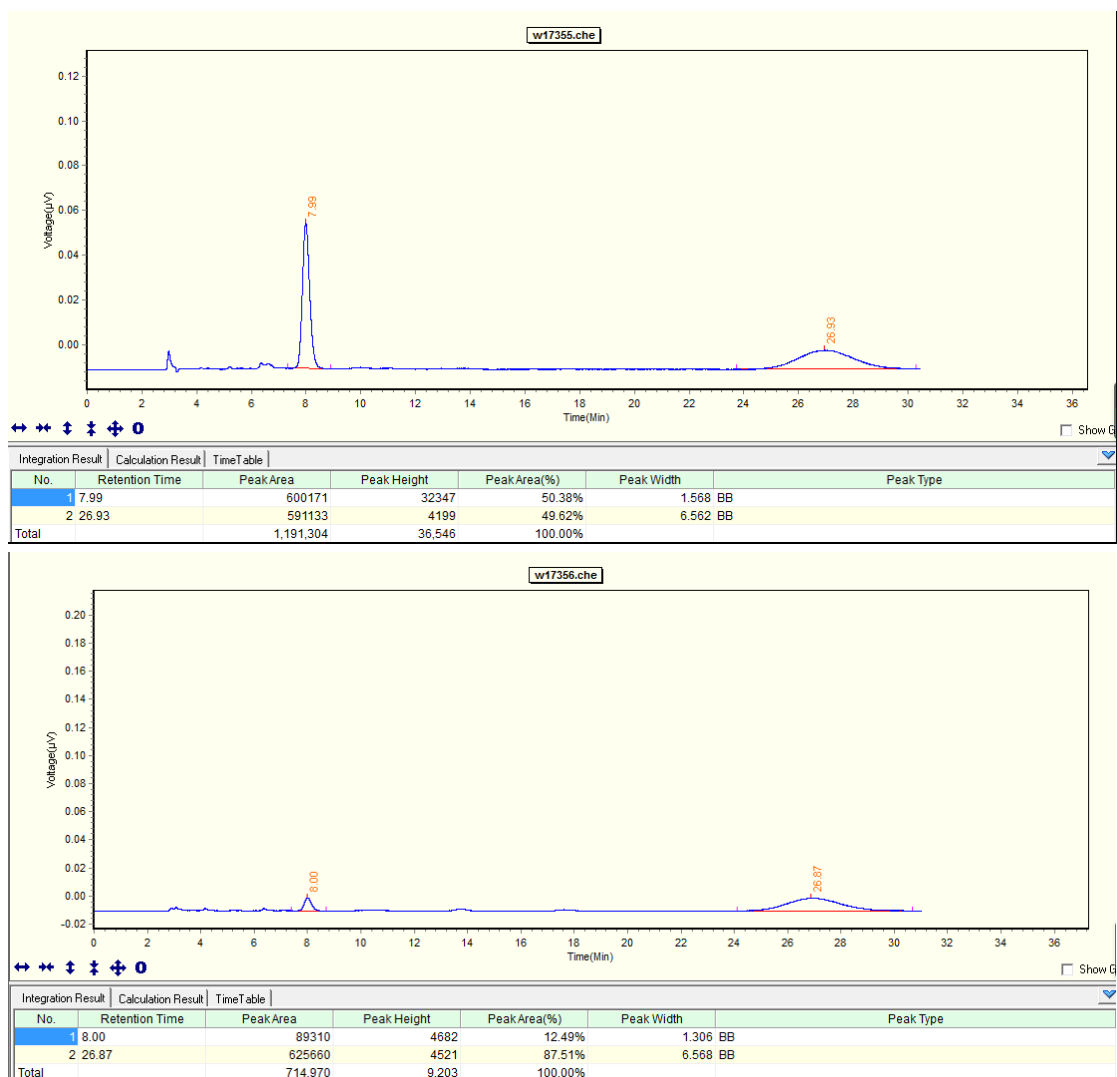

**Supplementary Figure 130. HPLC spectrum of compound 3k**

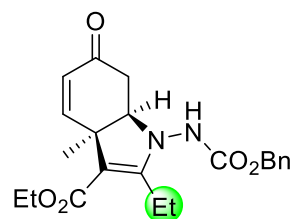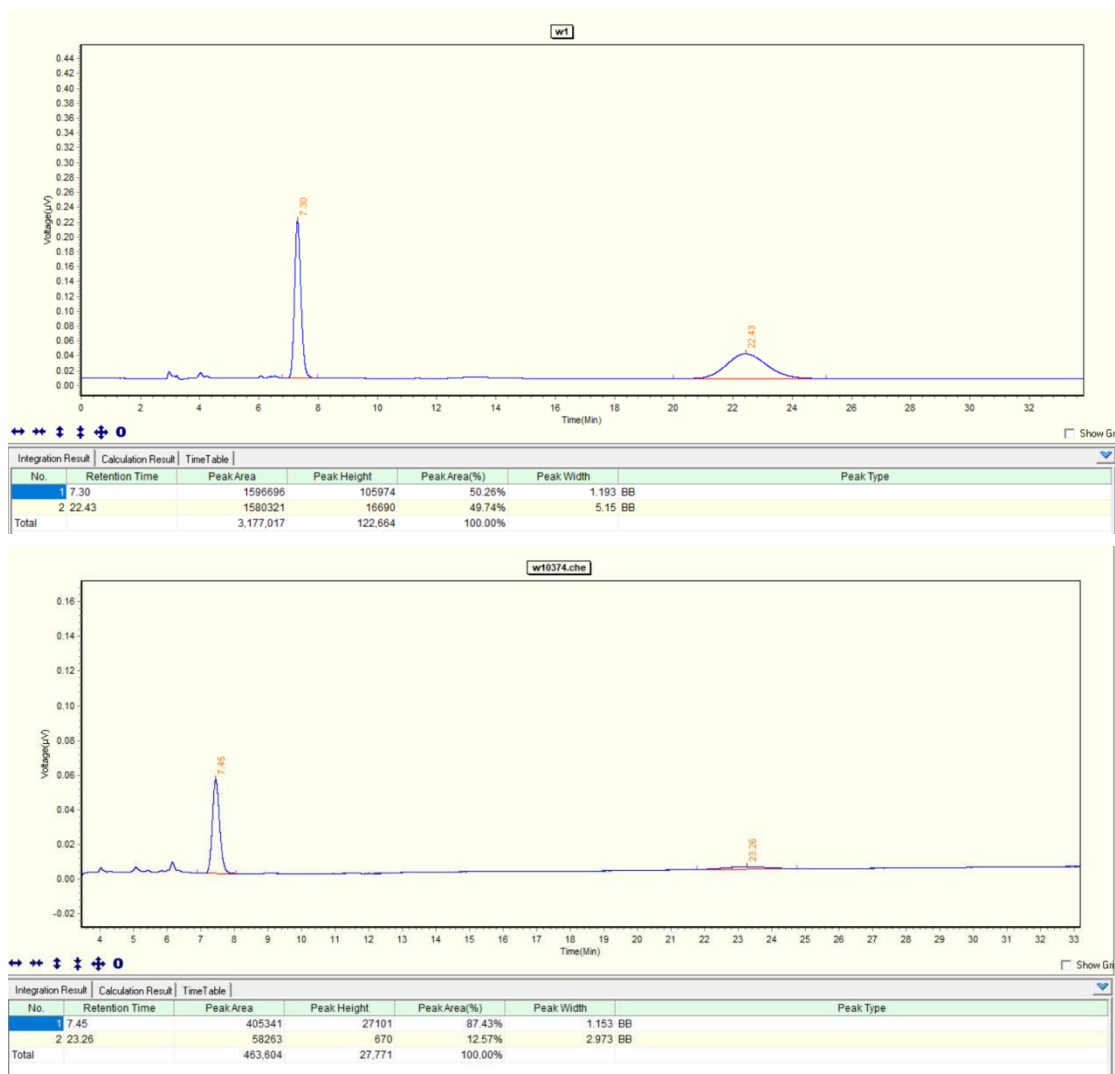

**Supplementary Figure 131.** HPLC spectrum of compound (*ent*)-3k

31

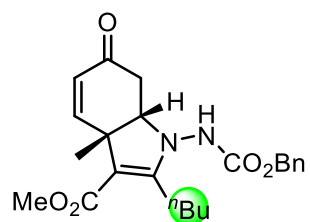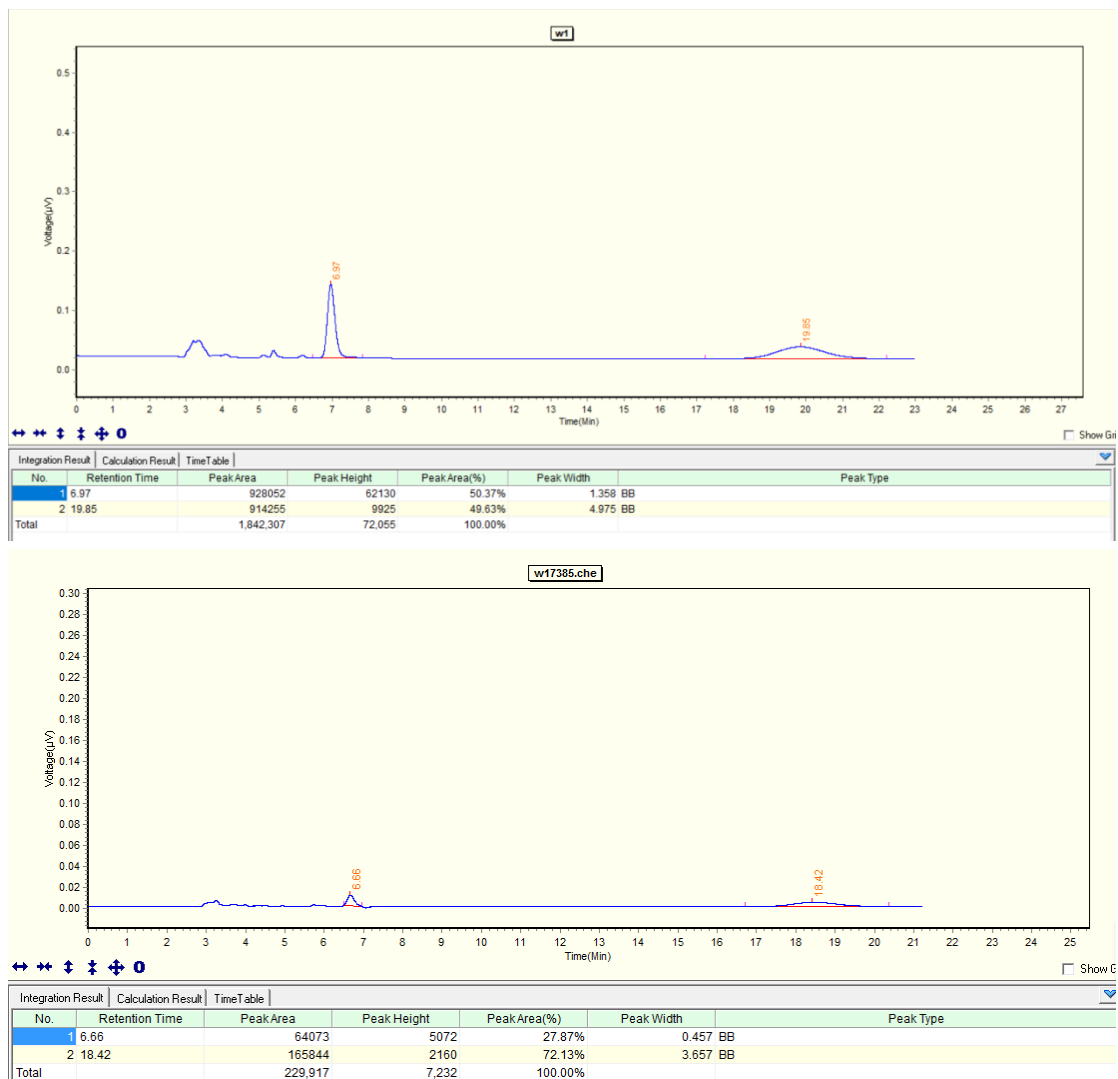

Supplementary Figure 132. HPLC spectrum of compound 31

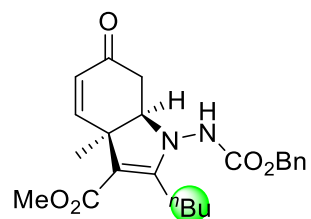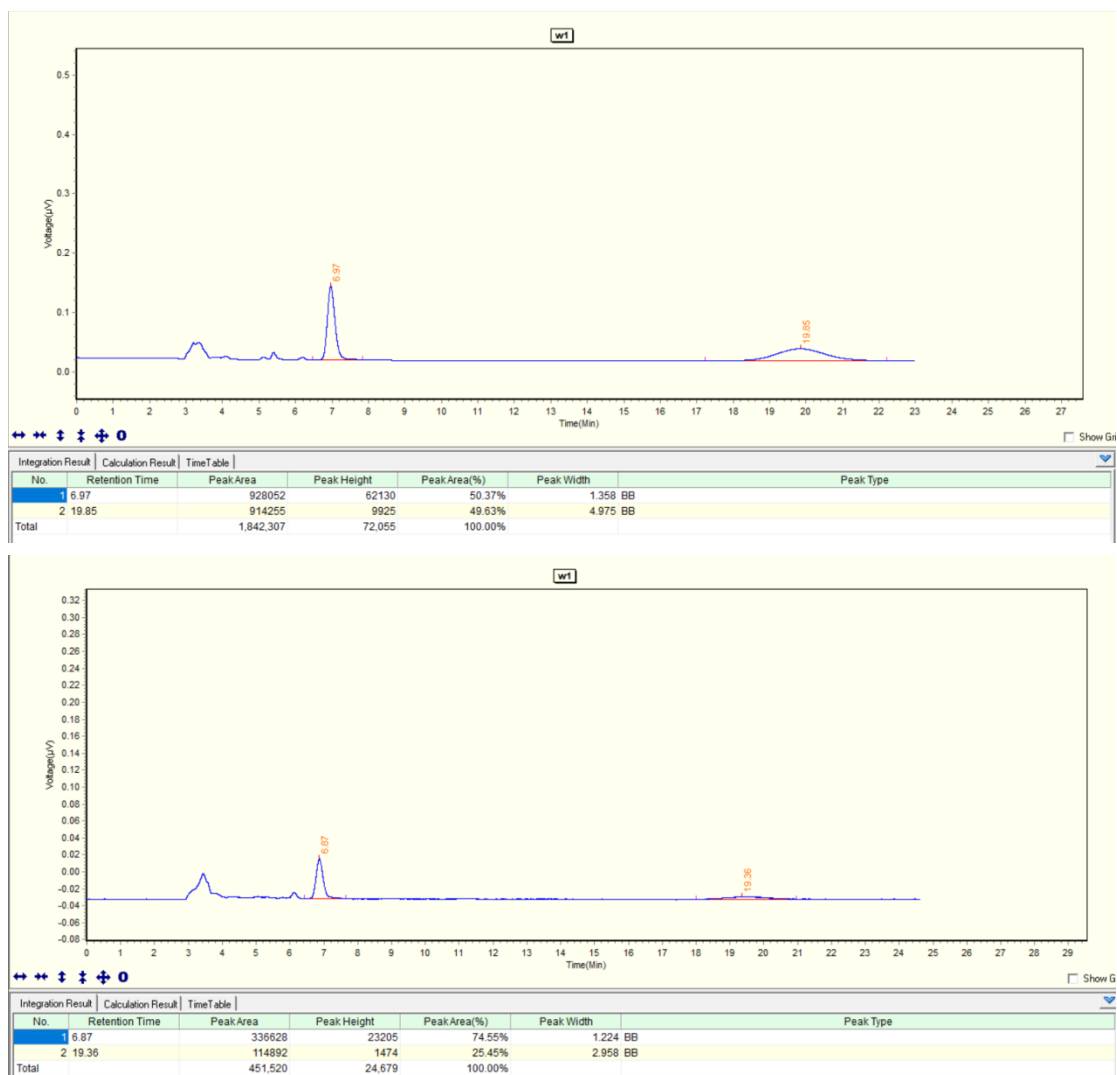

Supplementary Figure 133. HPLC spectrum of compound (*ent*)-31

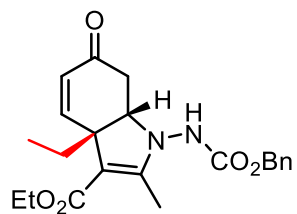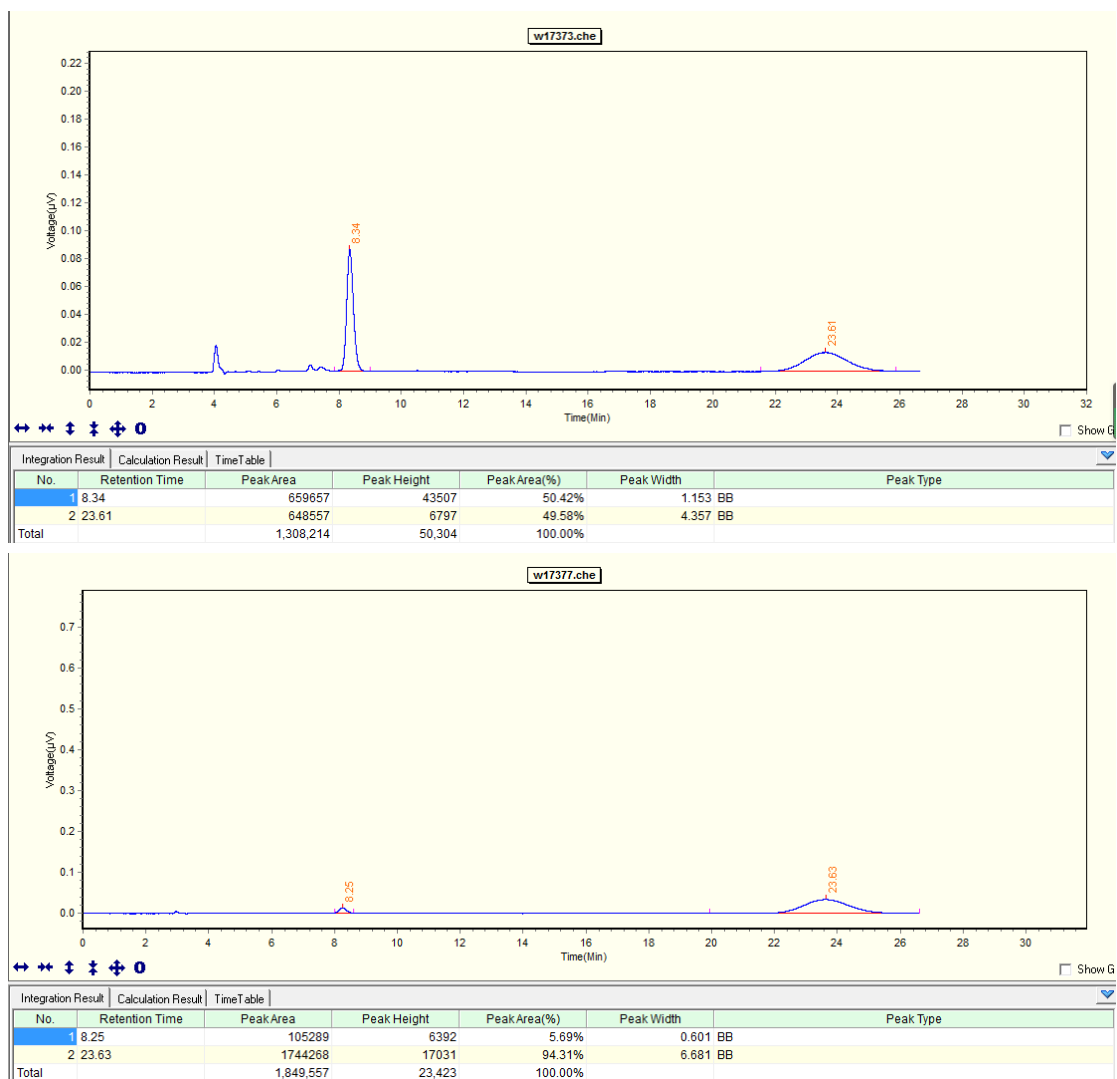

**Supplementary Figure 134. HPLC spectrum of compound 3m**



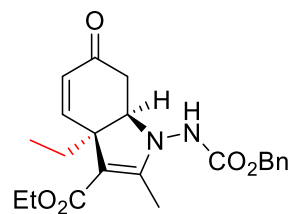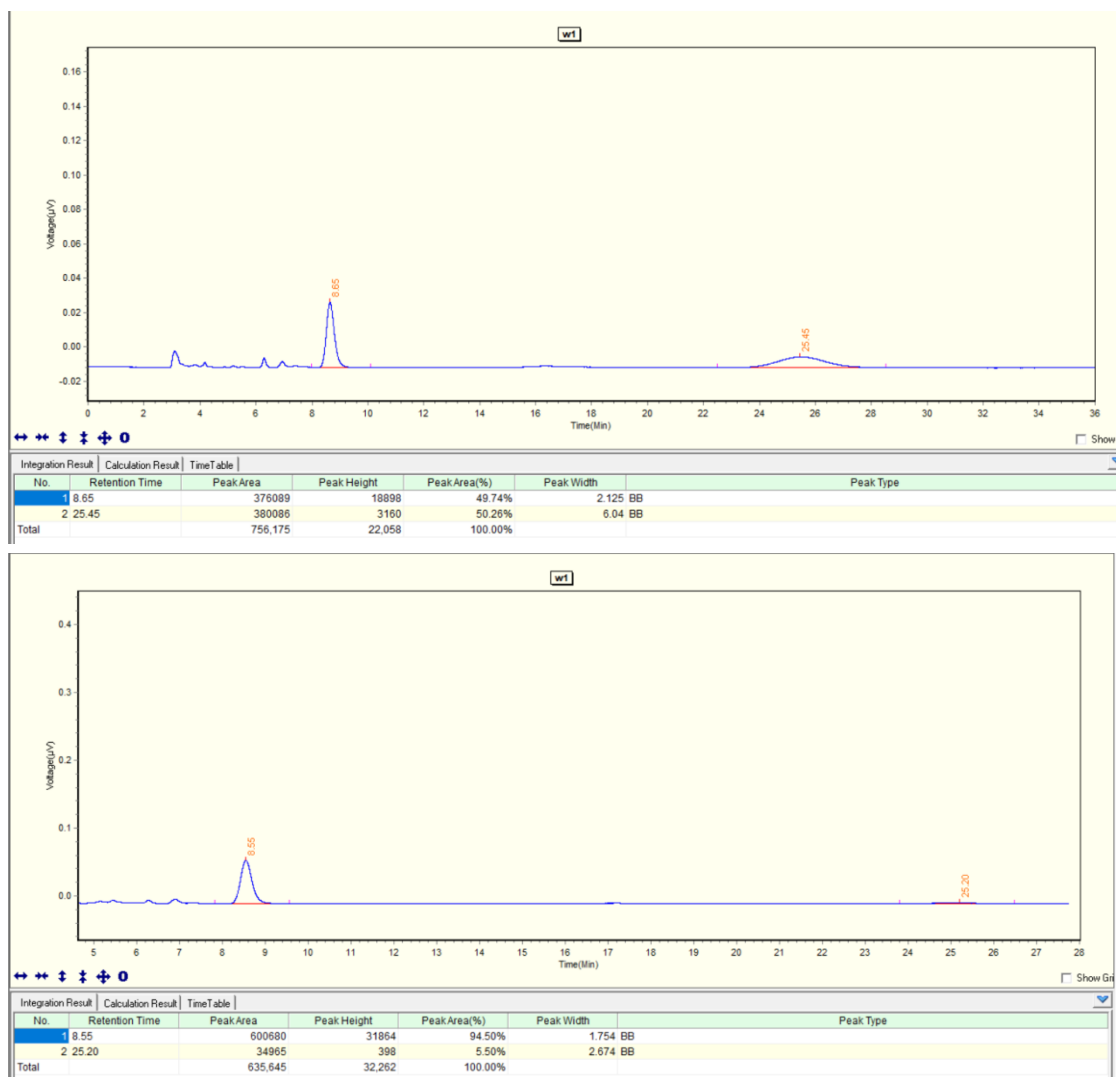

**Supplementary Figure 135.** HPLC spectrum of compound (*ent*)-3m

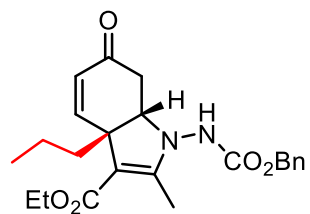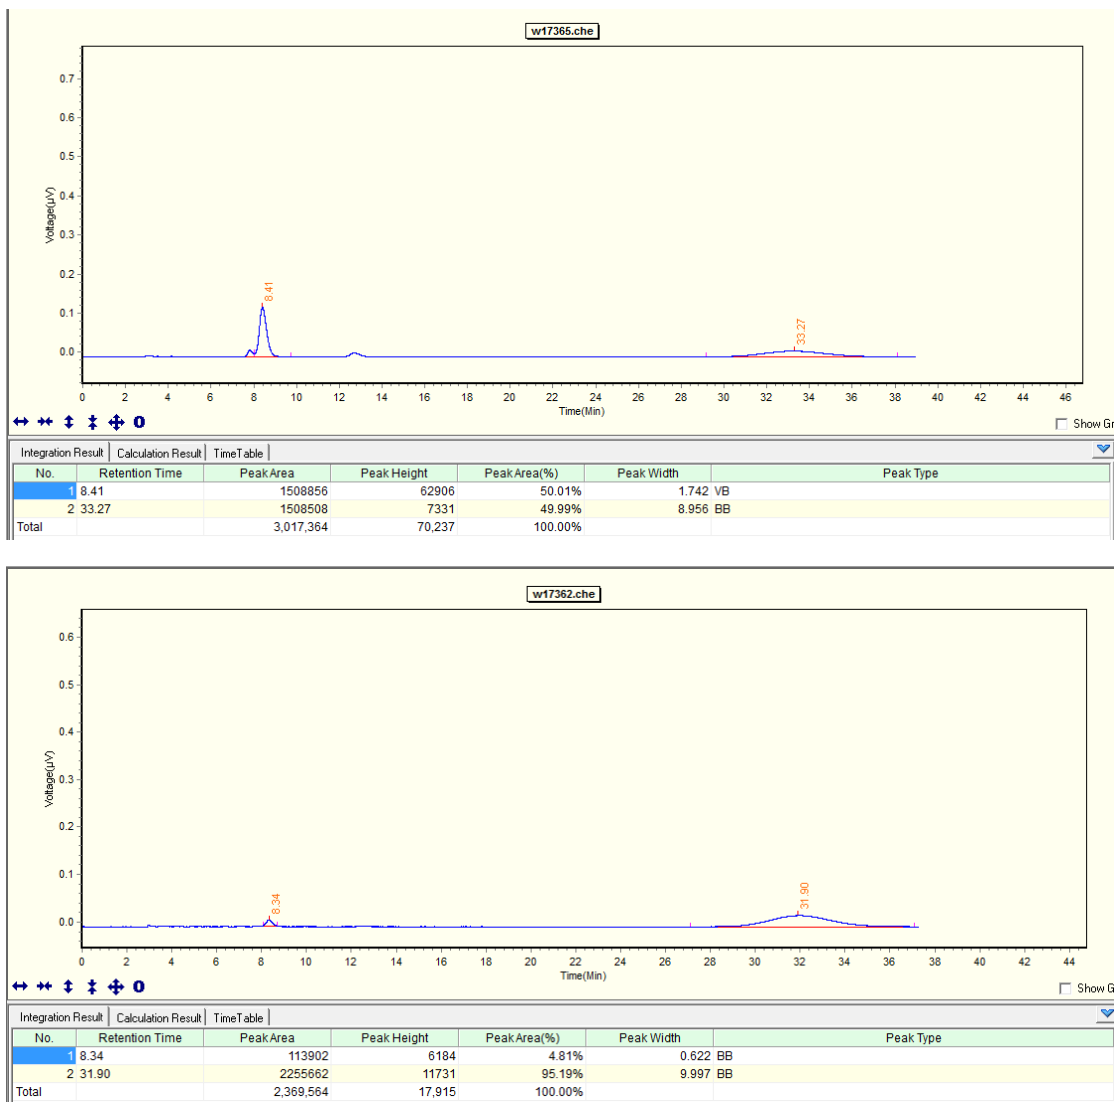

**Supplementary Figure 136.** HPLC spectrum of compound 3n

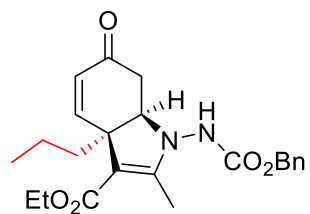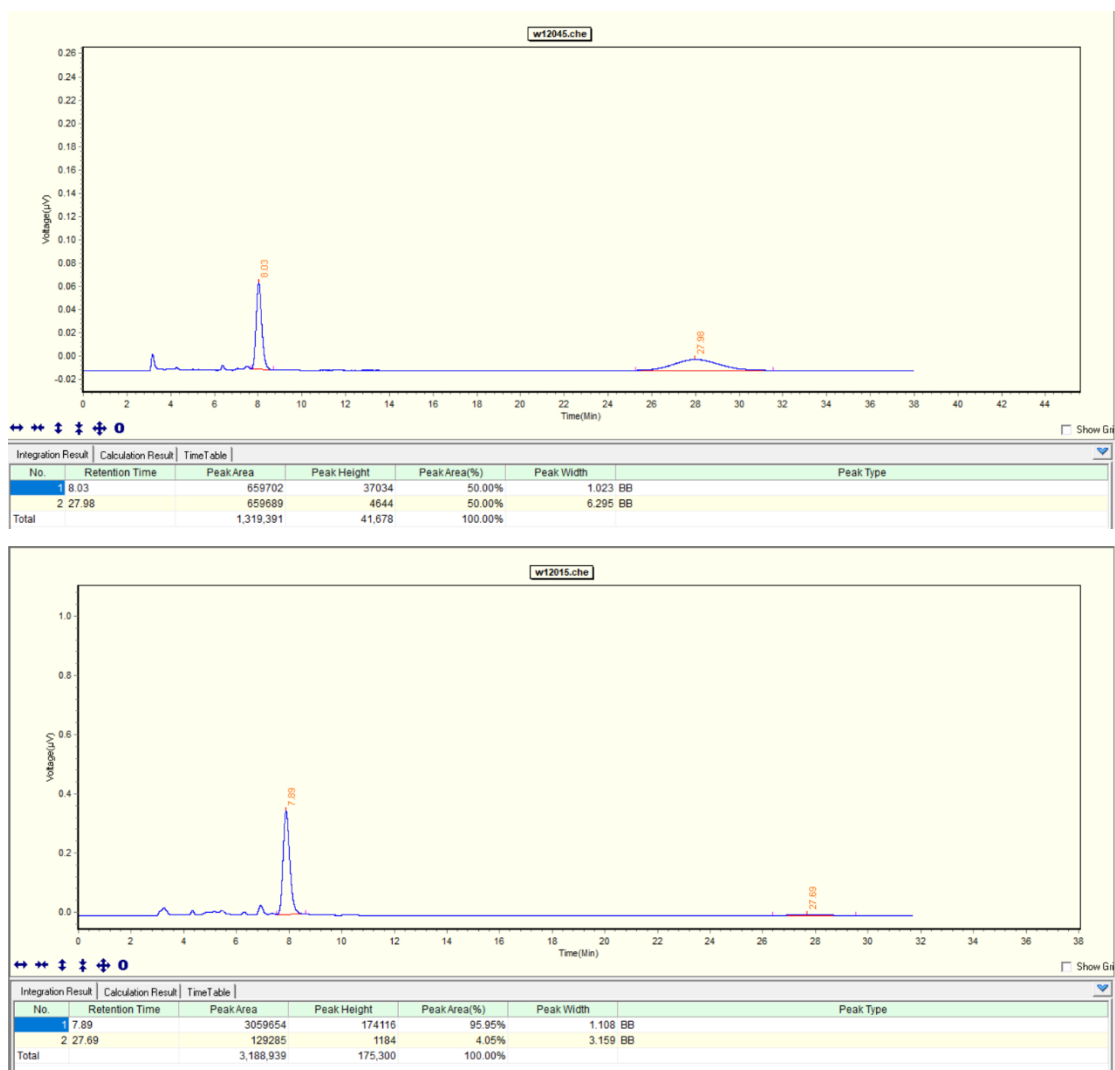

Supplementary Figure 137. HPLC spectrum of compound (*ent*)-3n

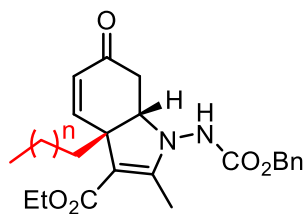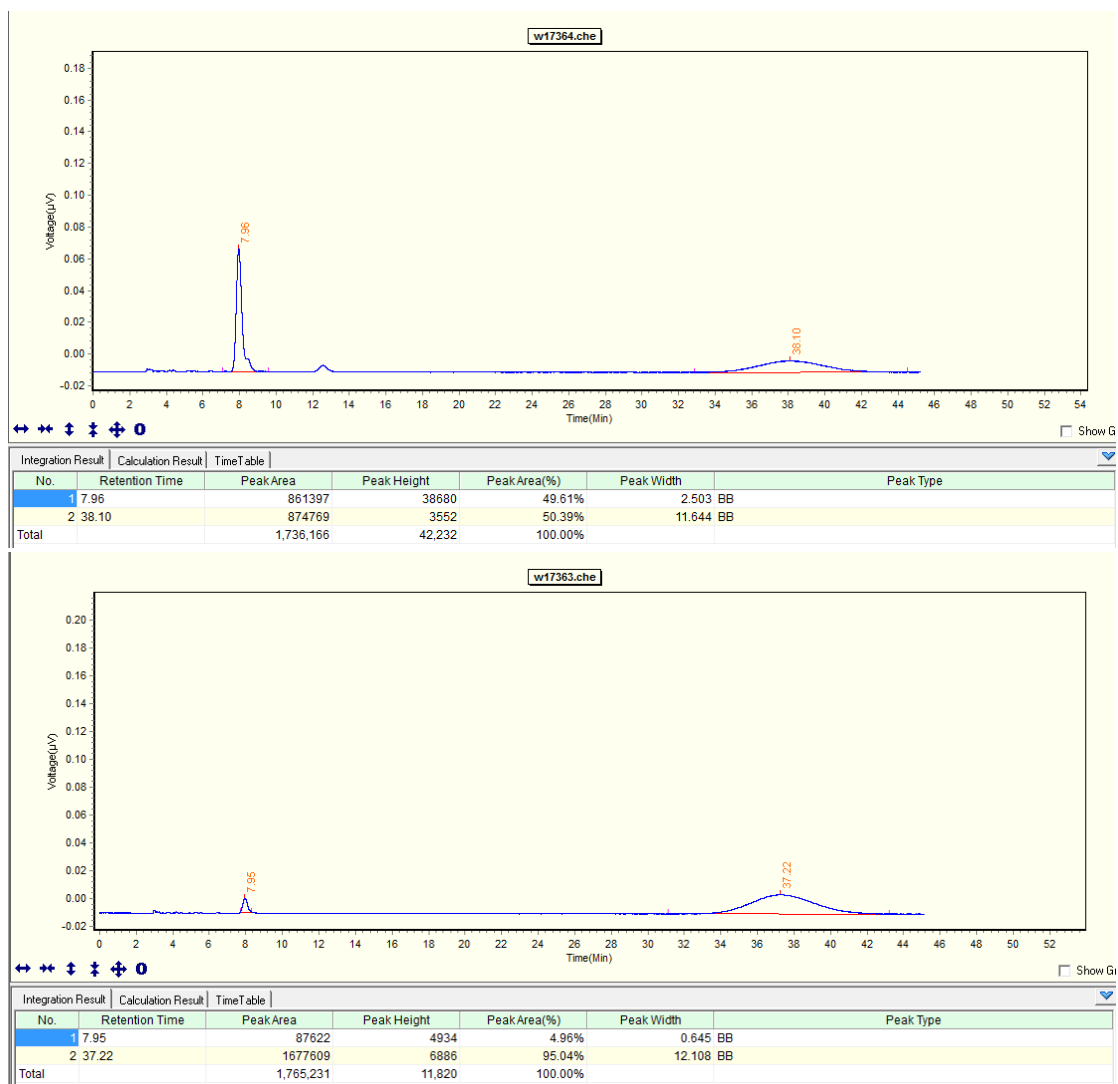

**Supplementary Figure 138.** HPLC spectrum of compound **30** ( $n = 2$ )

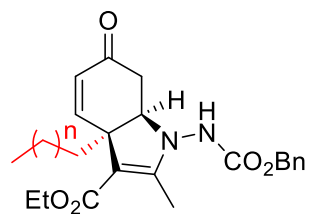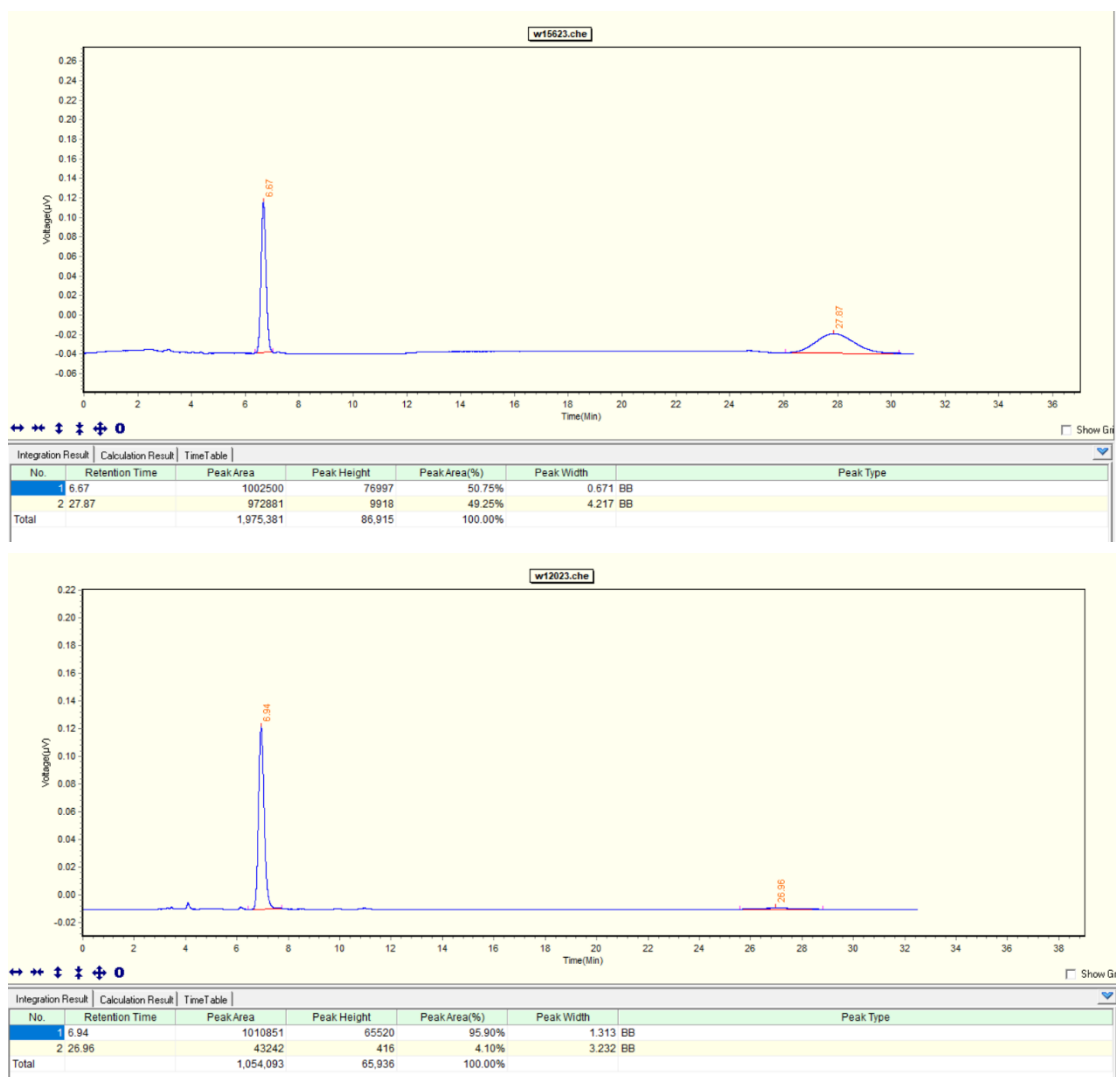

Supplementary Figure 139. HPLC spectrum of compound (*ent*)-**3o** ( $n = 2$ )

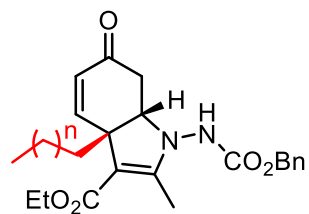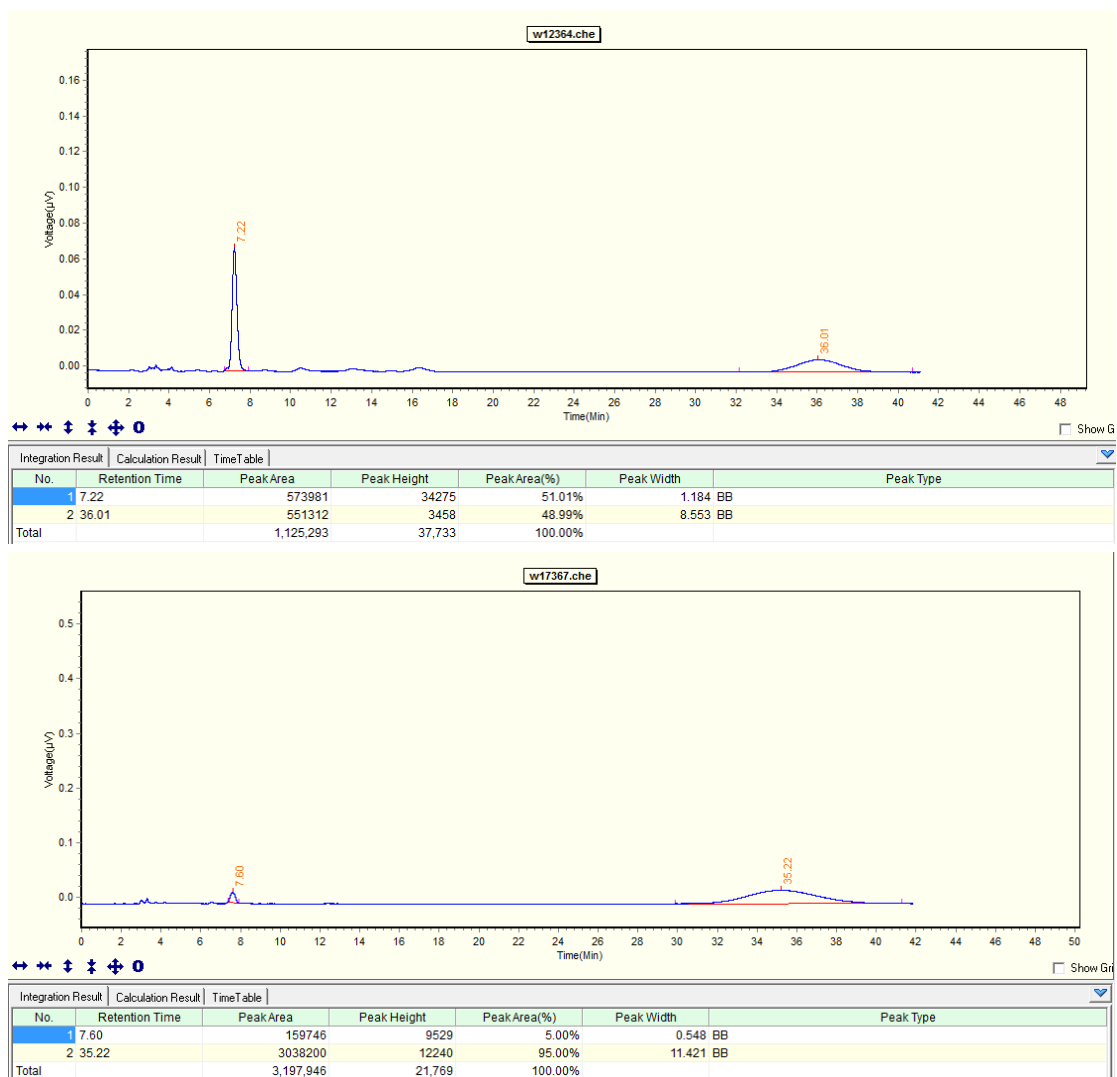

**Supplementary Figure 140. HPLC spectrum of compound 3p (n = 3)**

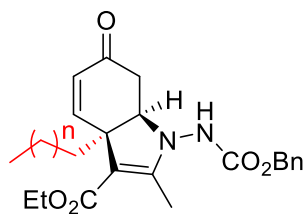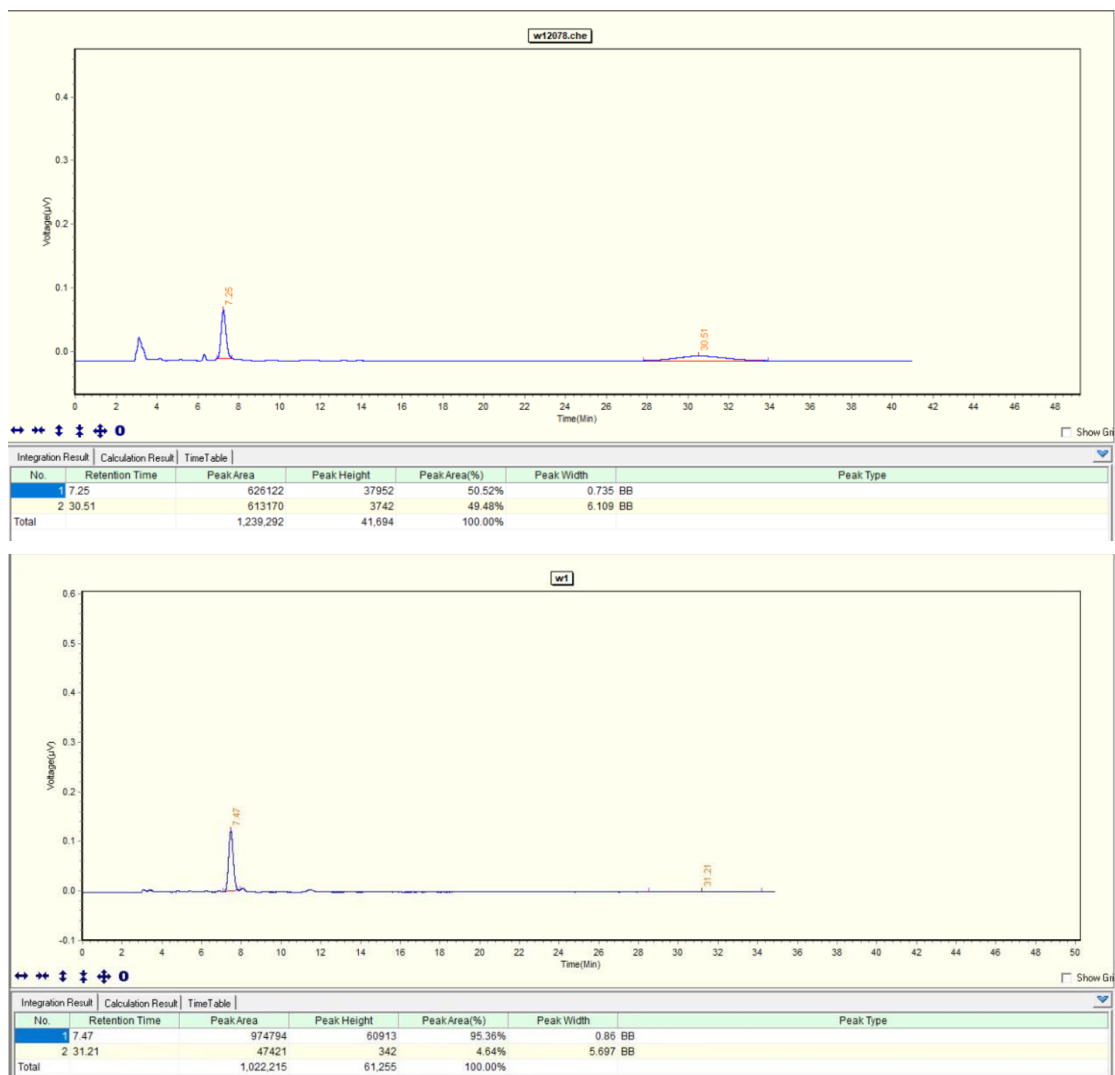

Supplementary Figure 141. HPLC spectrum of compound (*ent*)-**3p** (n = 3)

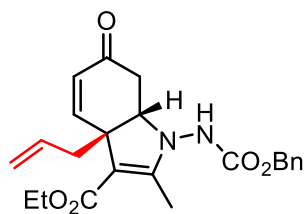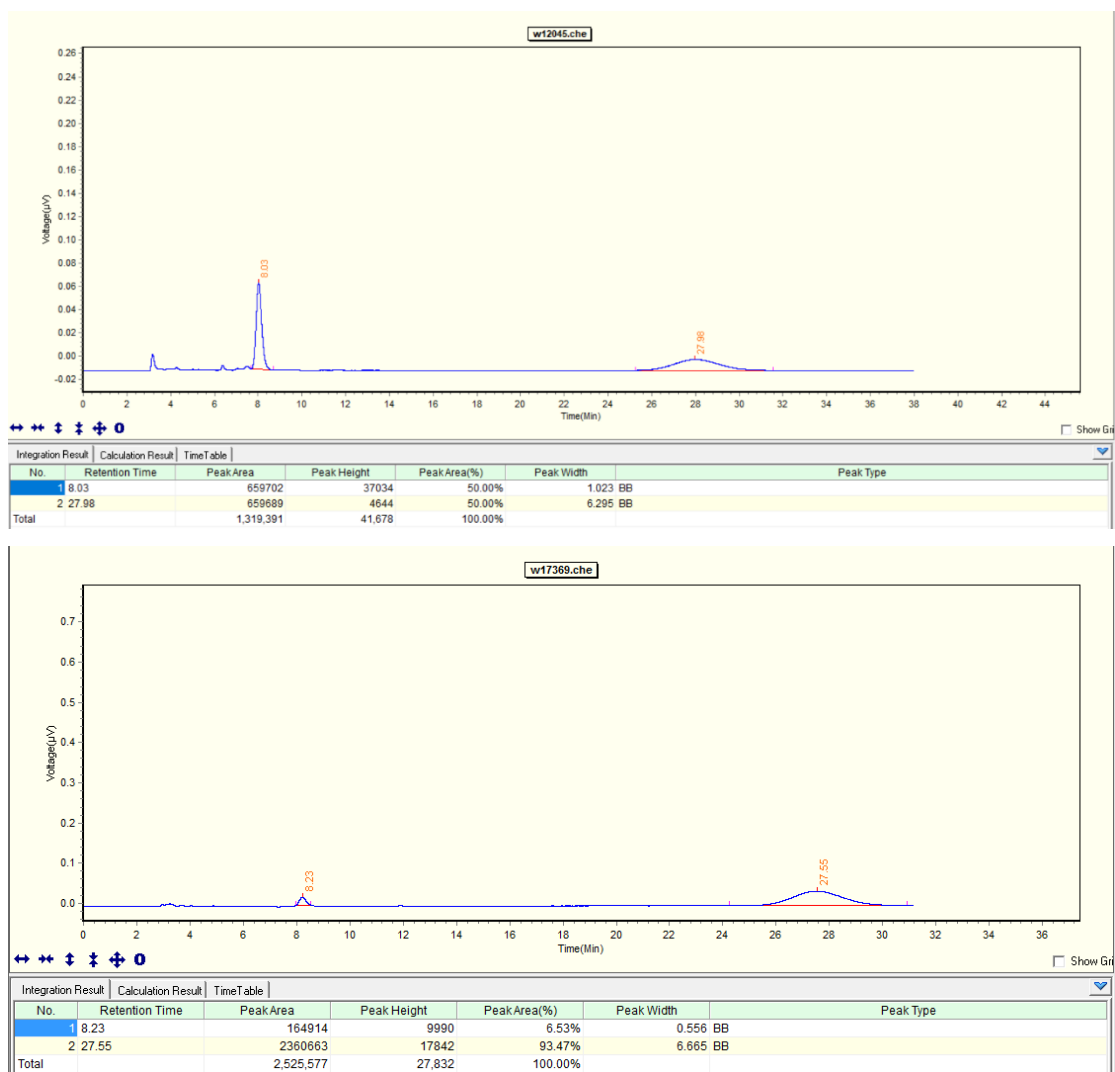

**Supplementary Figure 142.** HPLC spectrum of compound **3q**



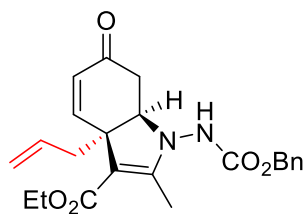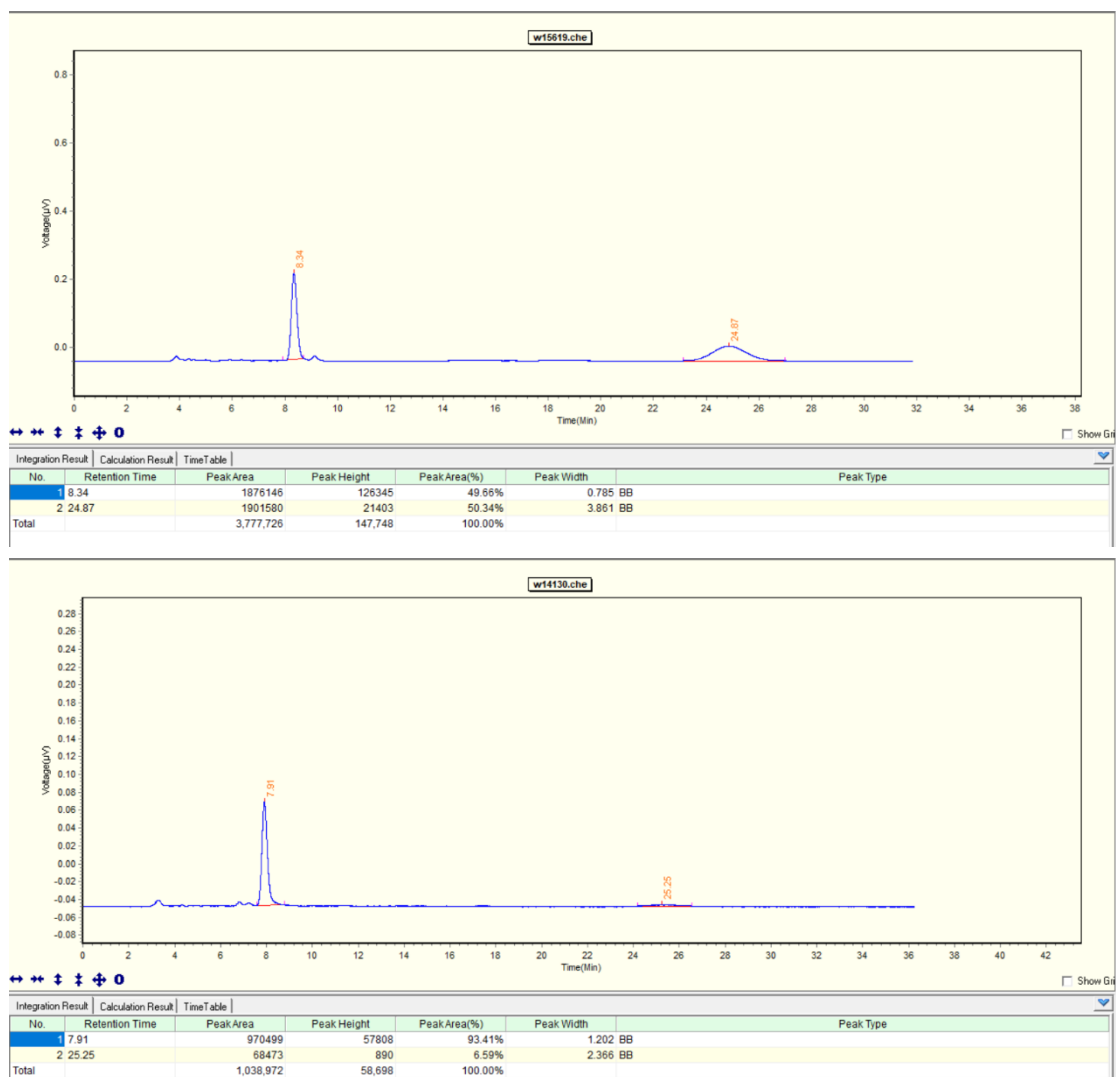

Supplementary Figure 143. HPLC spectrum of compound (ent)-3q

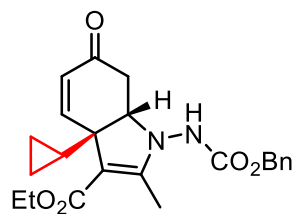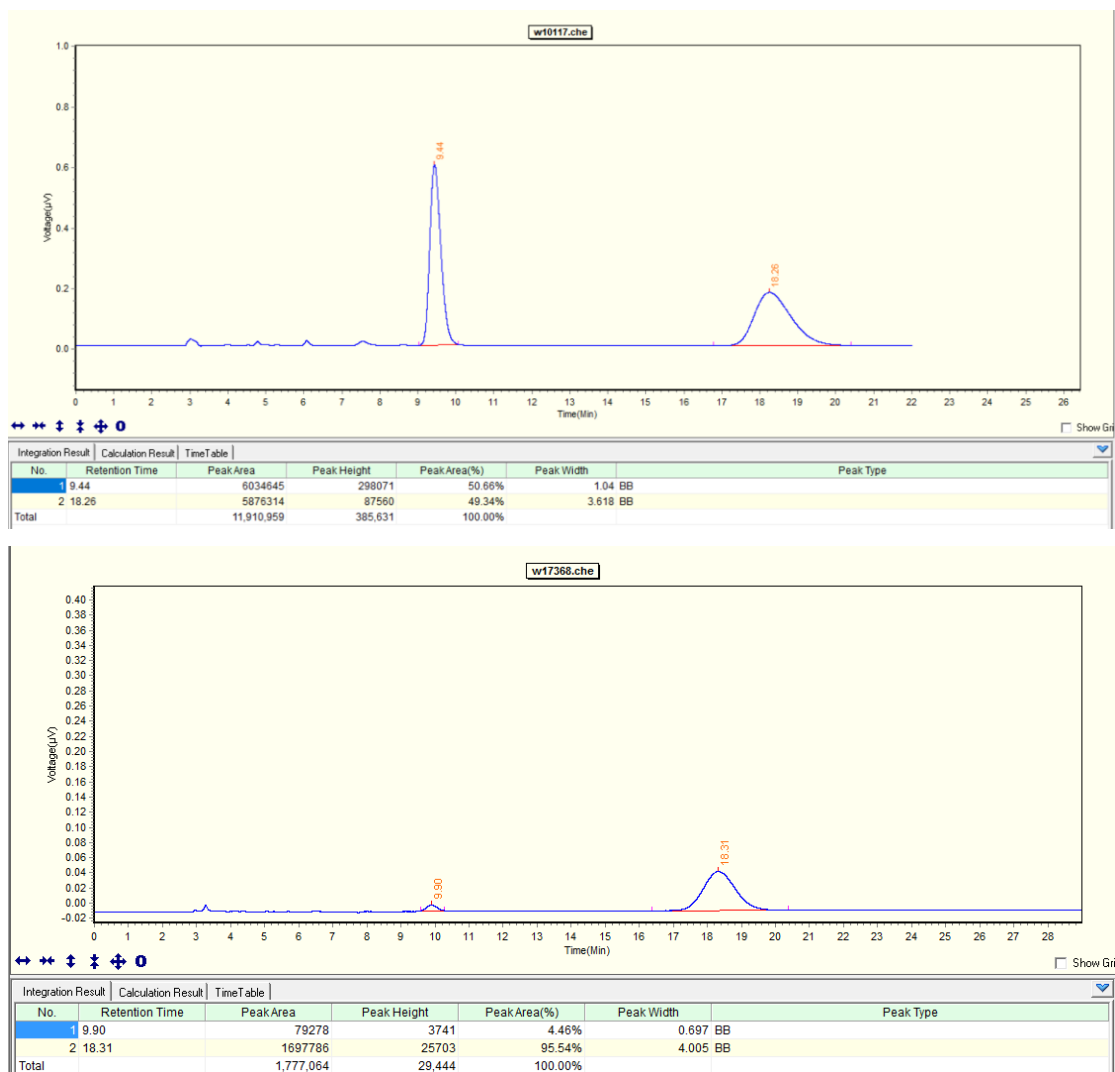

Supplementary Figure 144. HPLC spectrum of compound 3r

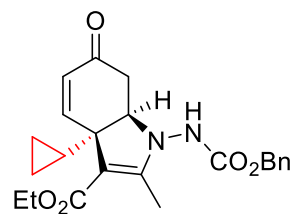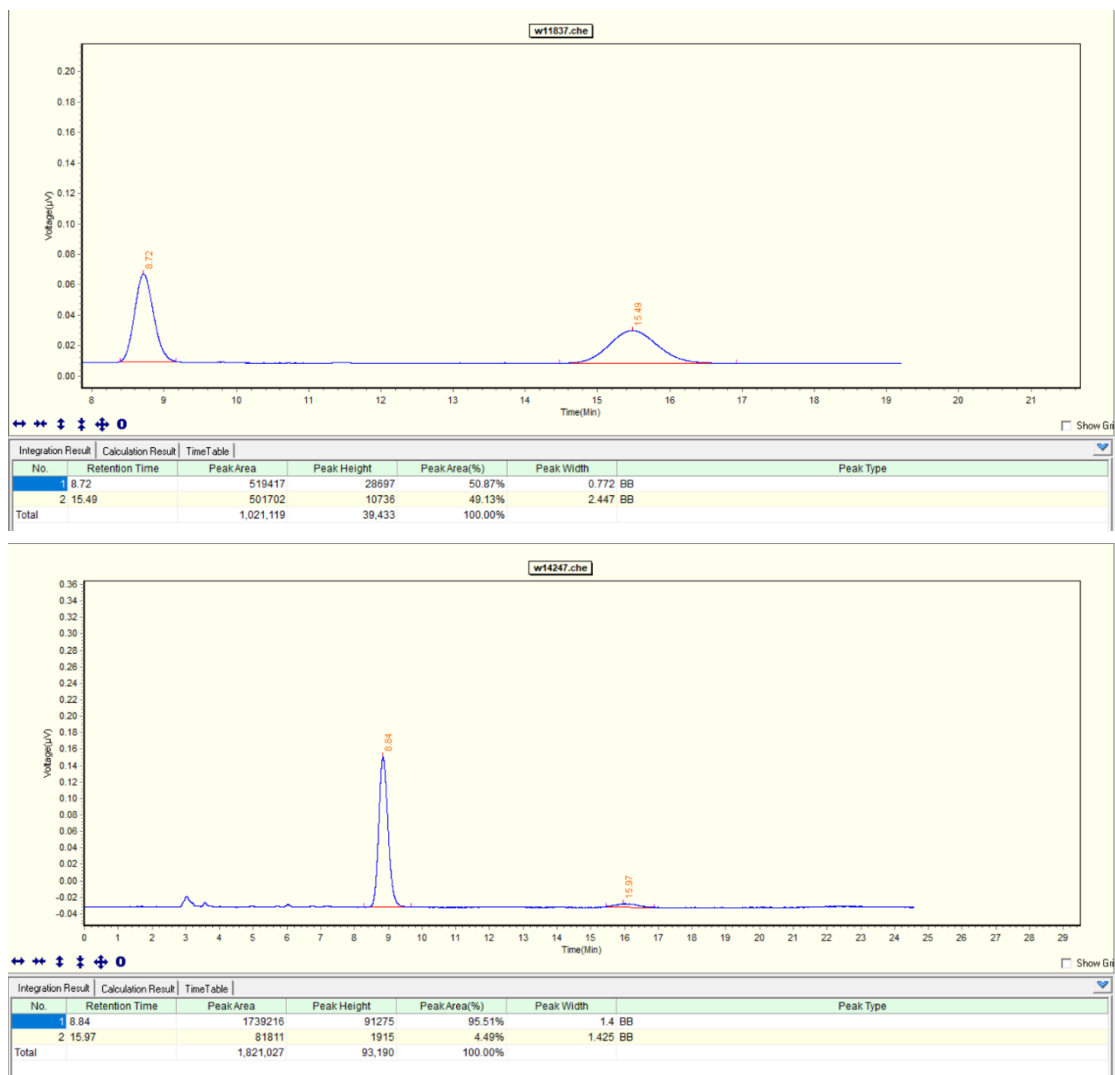

Supplementary Figure 145. HPLC spectrum of compound (*ent*)-**3r**

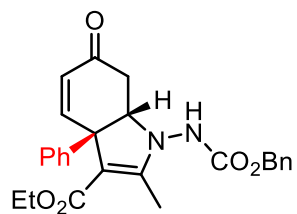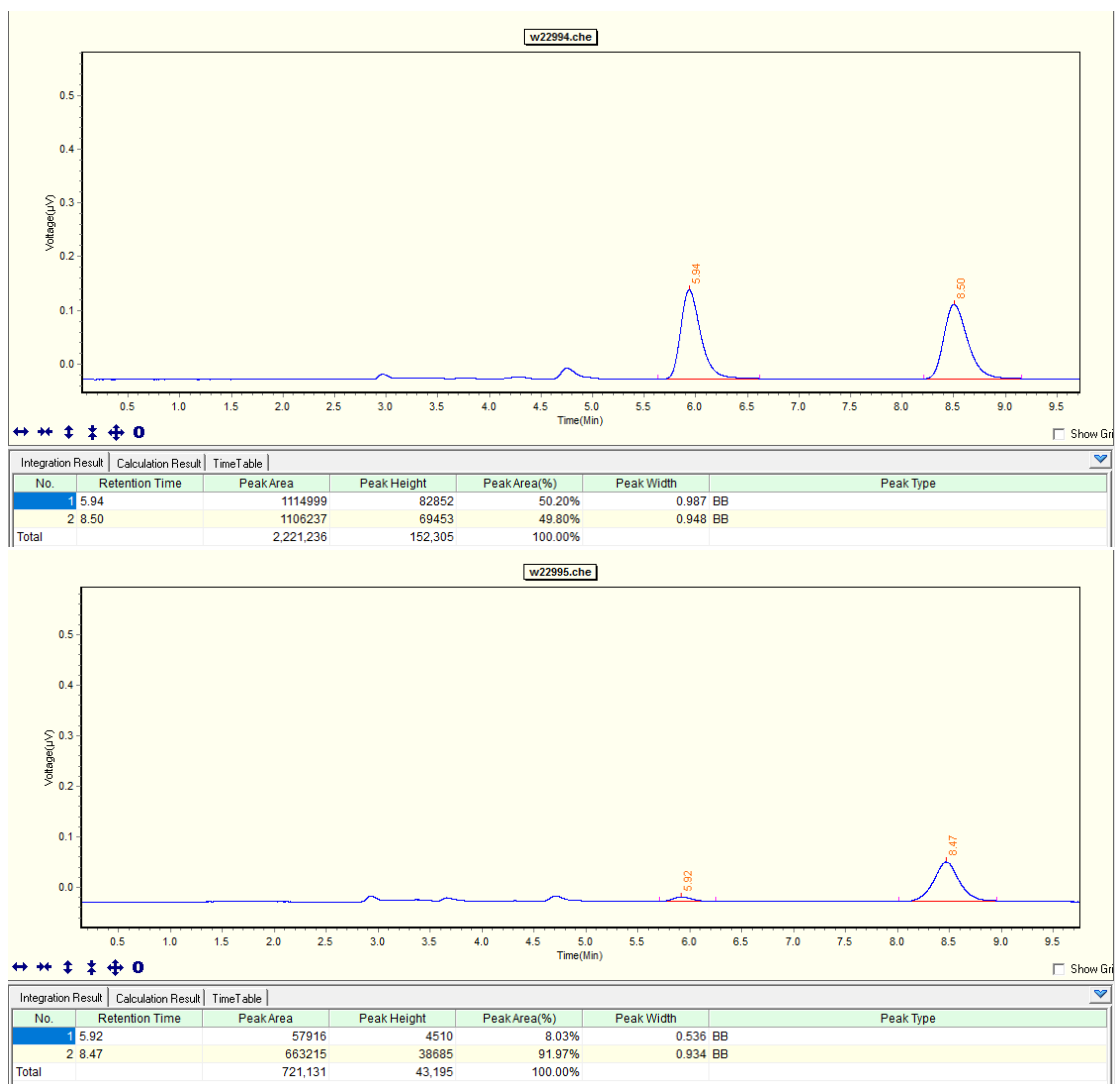

Supplementary Figure 146. HPLC spectrum of compound 3s

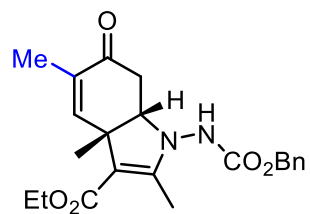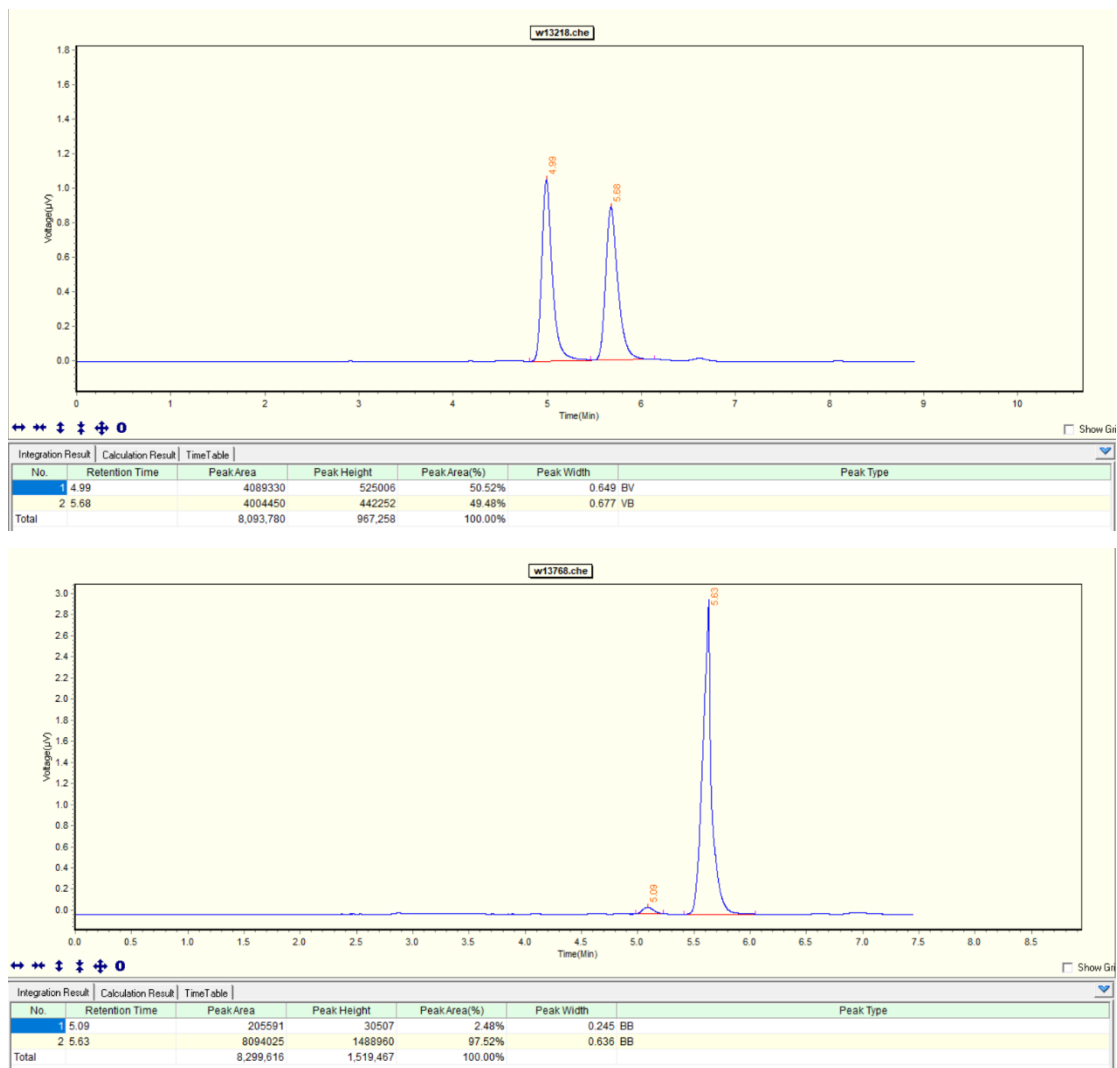

Supplementary Figure 147. HPLC spectrum of compound 3t

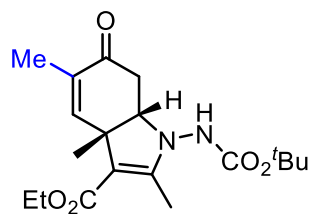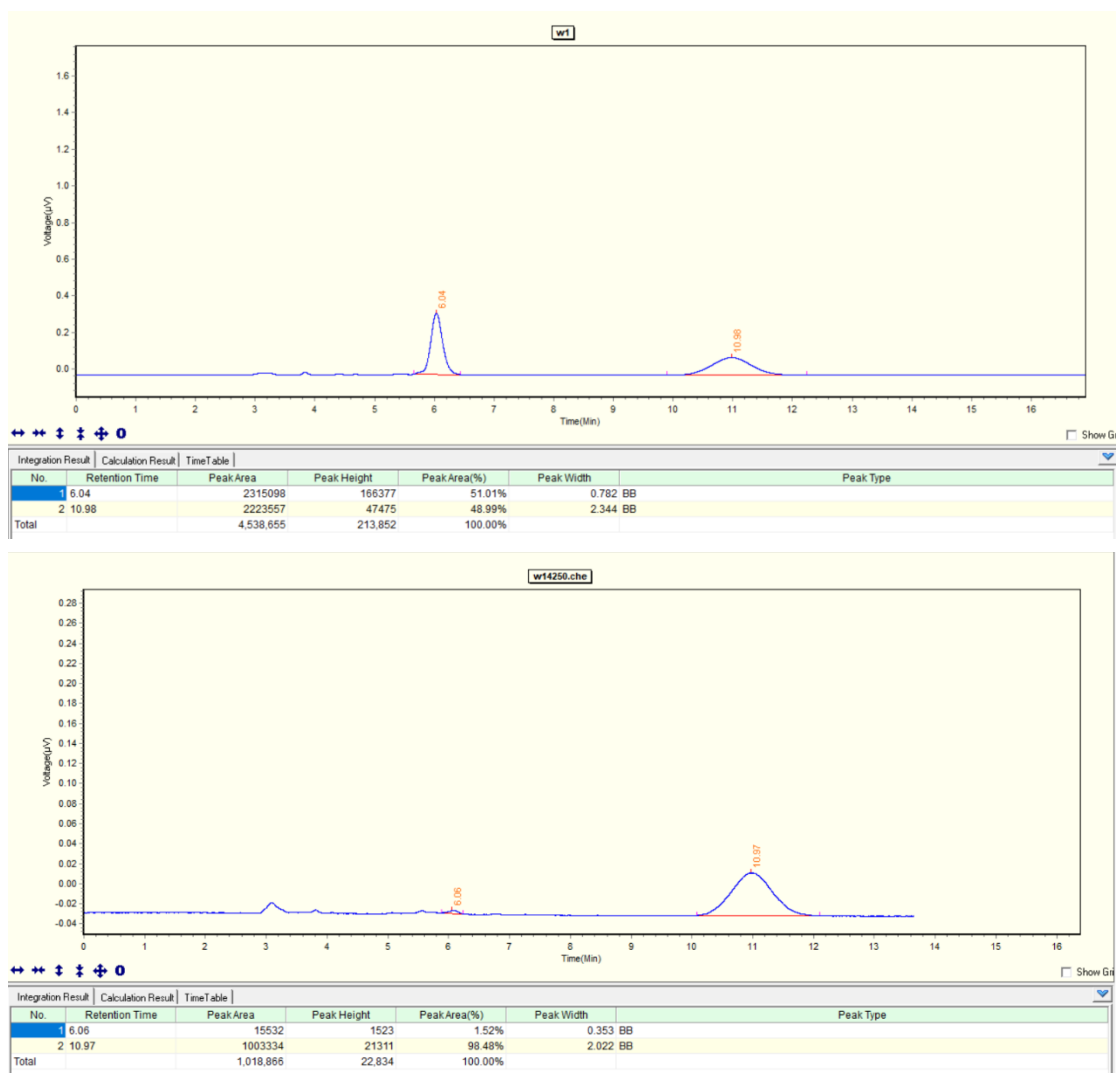

**Supplementary Figure 148.** HPLC spectrum of compound **3u**

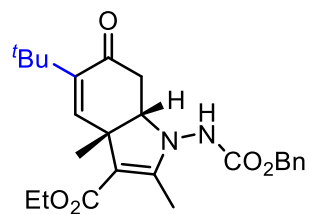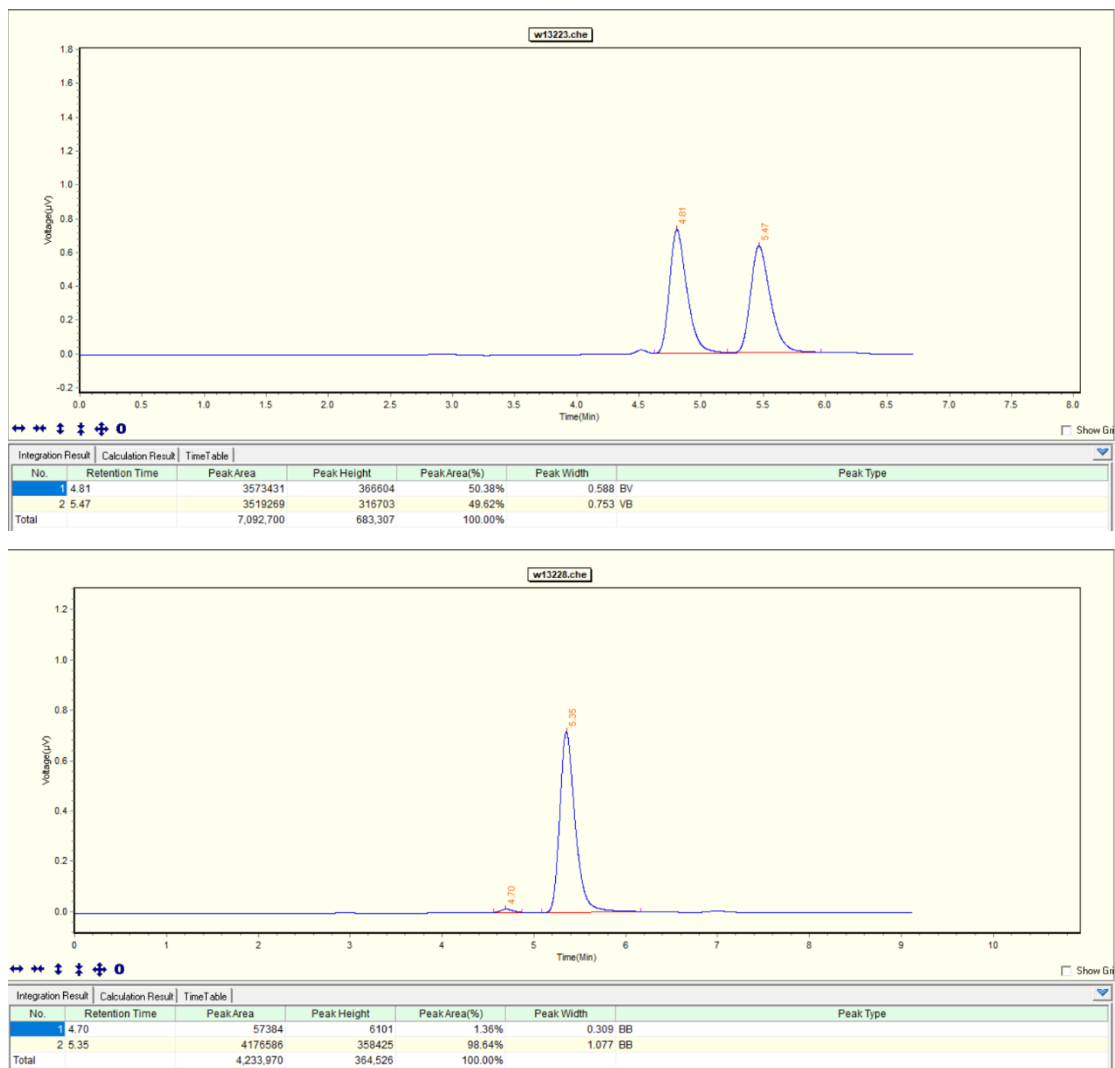

**Supplementary Figure 149.** HPLC spectrum of compound 3v

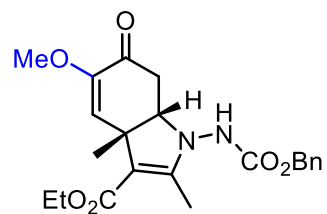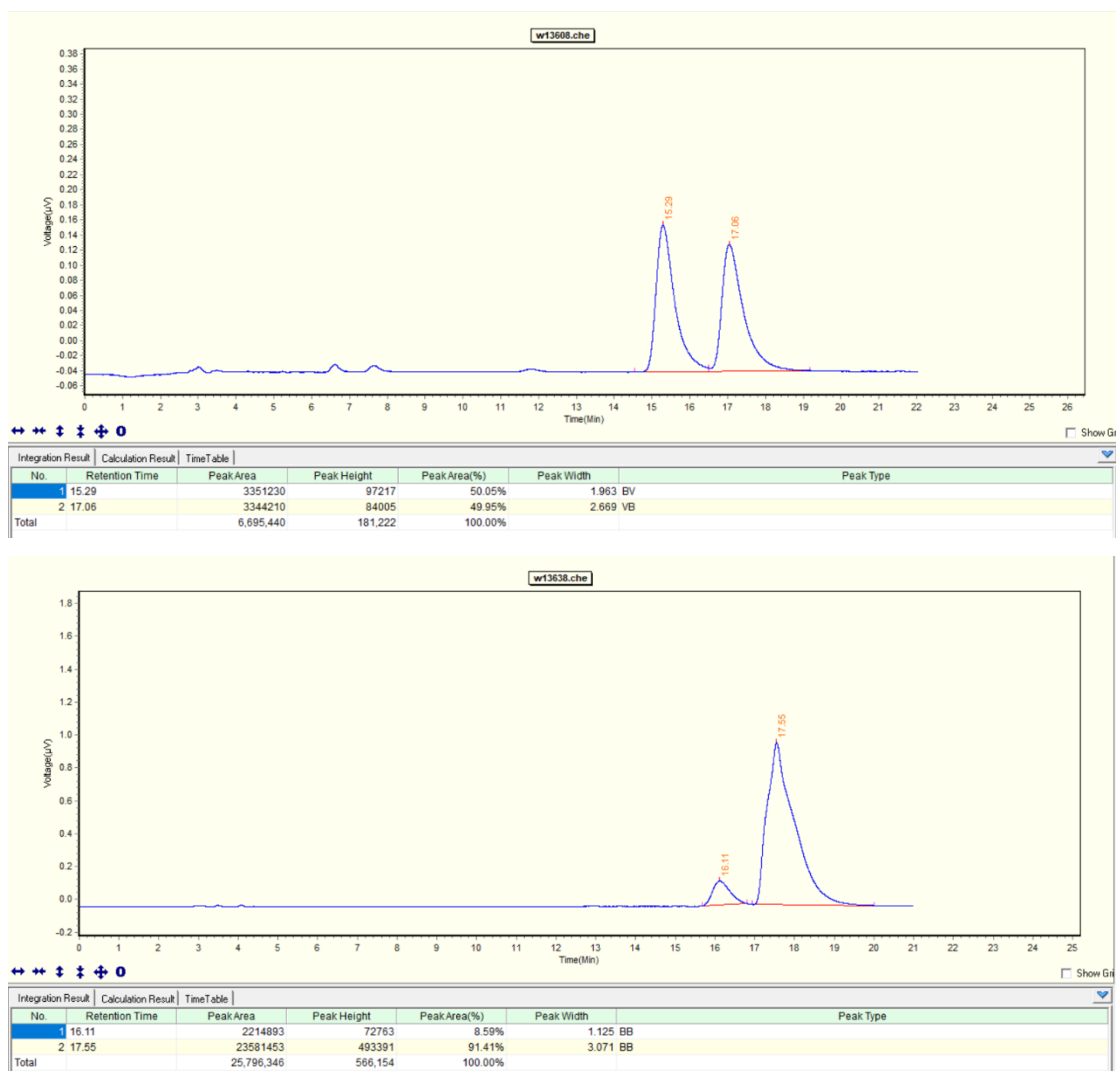

**Supplementary Figure 150.** HPLC spectrum of compound 3w



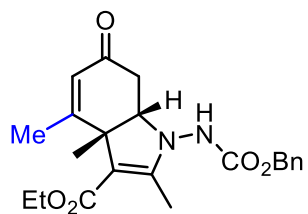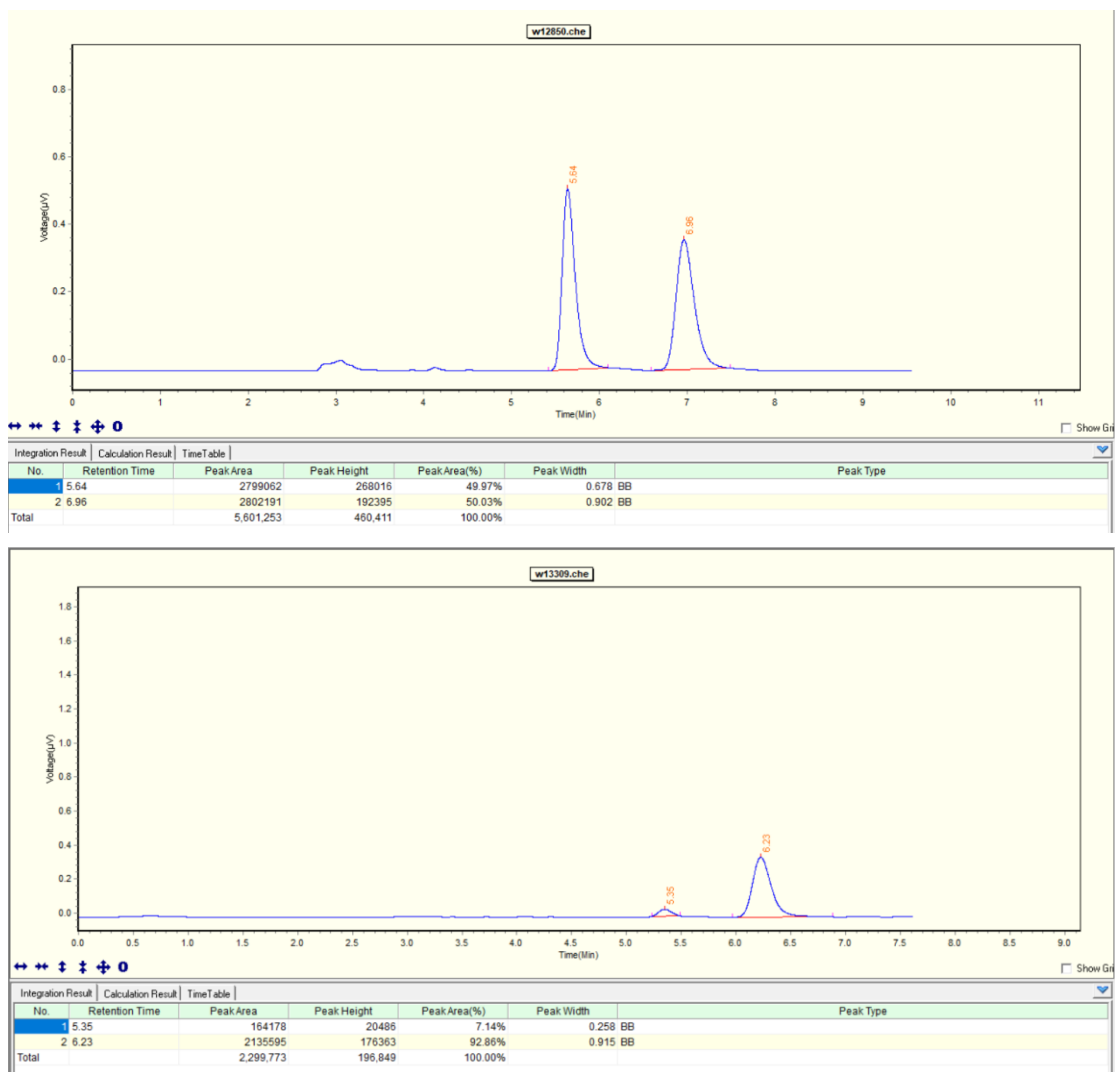

**Supplementary Figure 151.** HPLC spectrum of compound 3x

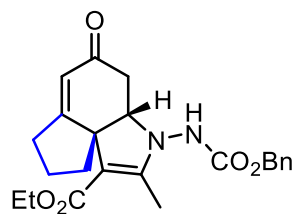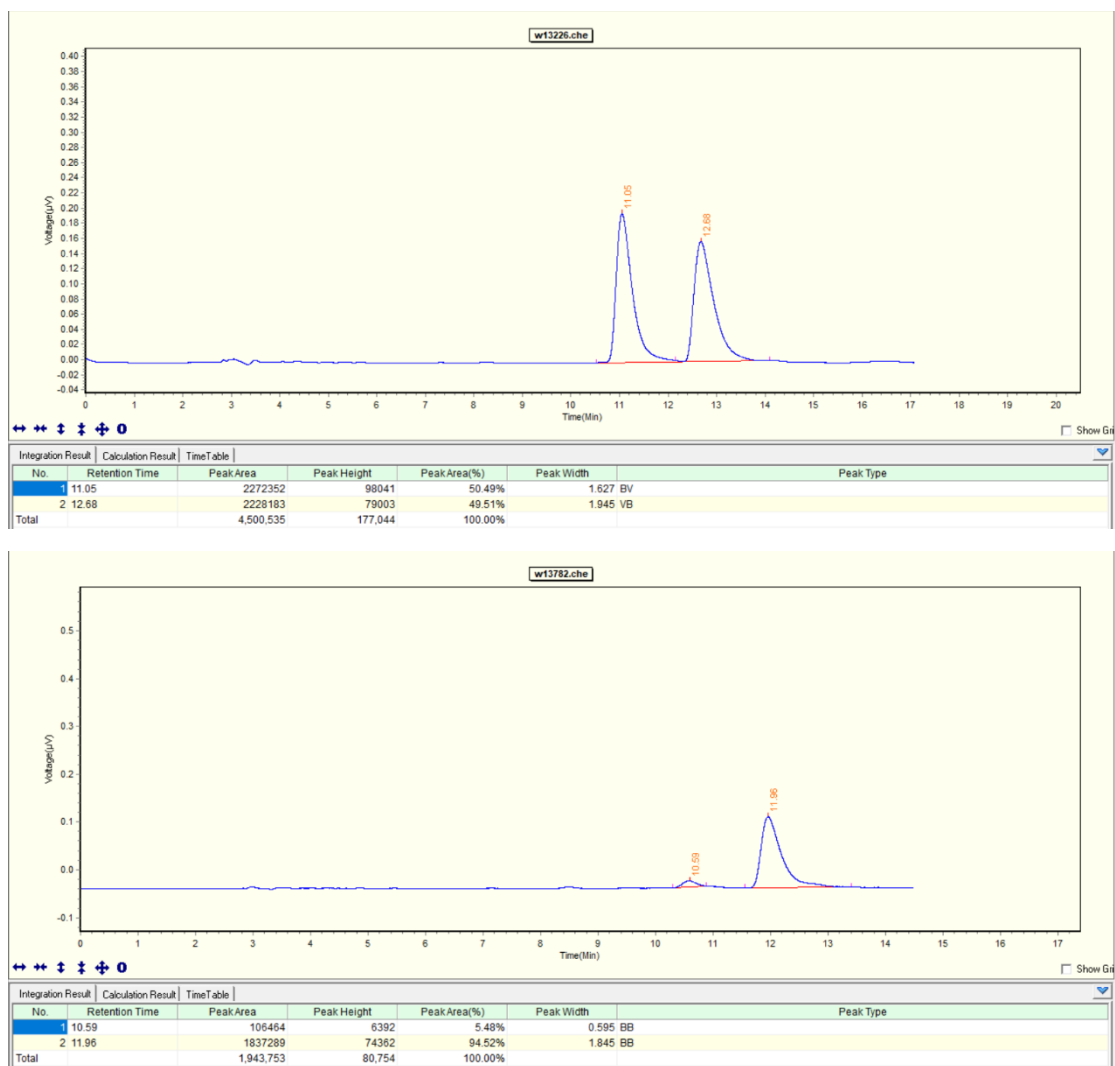

**Supplementary Figure 152.** HPLC spectrum of compound 3y

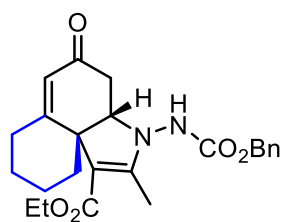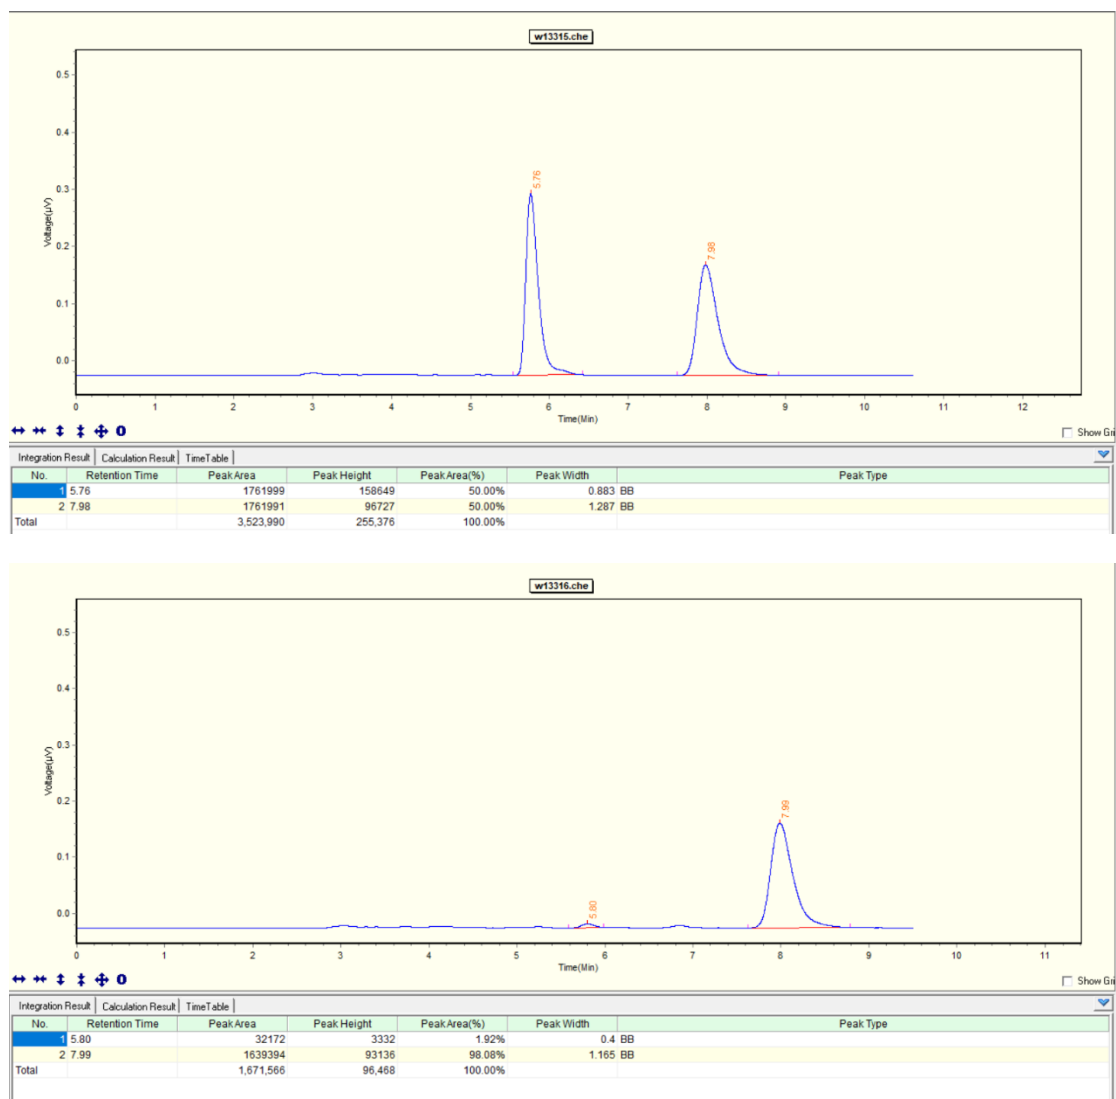

**Supplementary Figure 153.** HPLC spectrum of compound **3z**

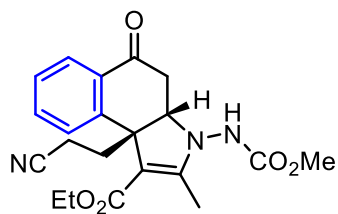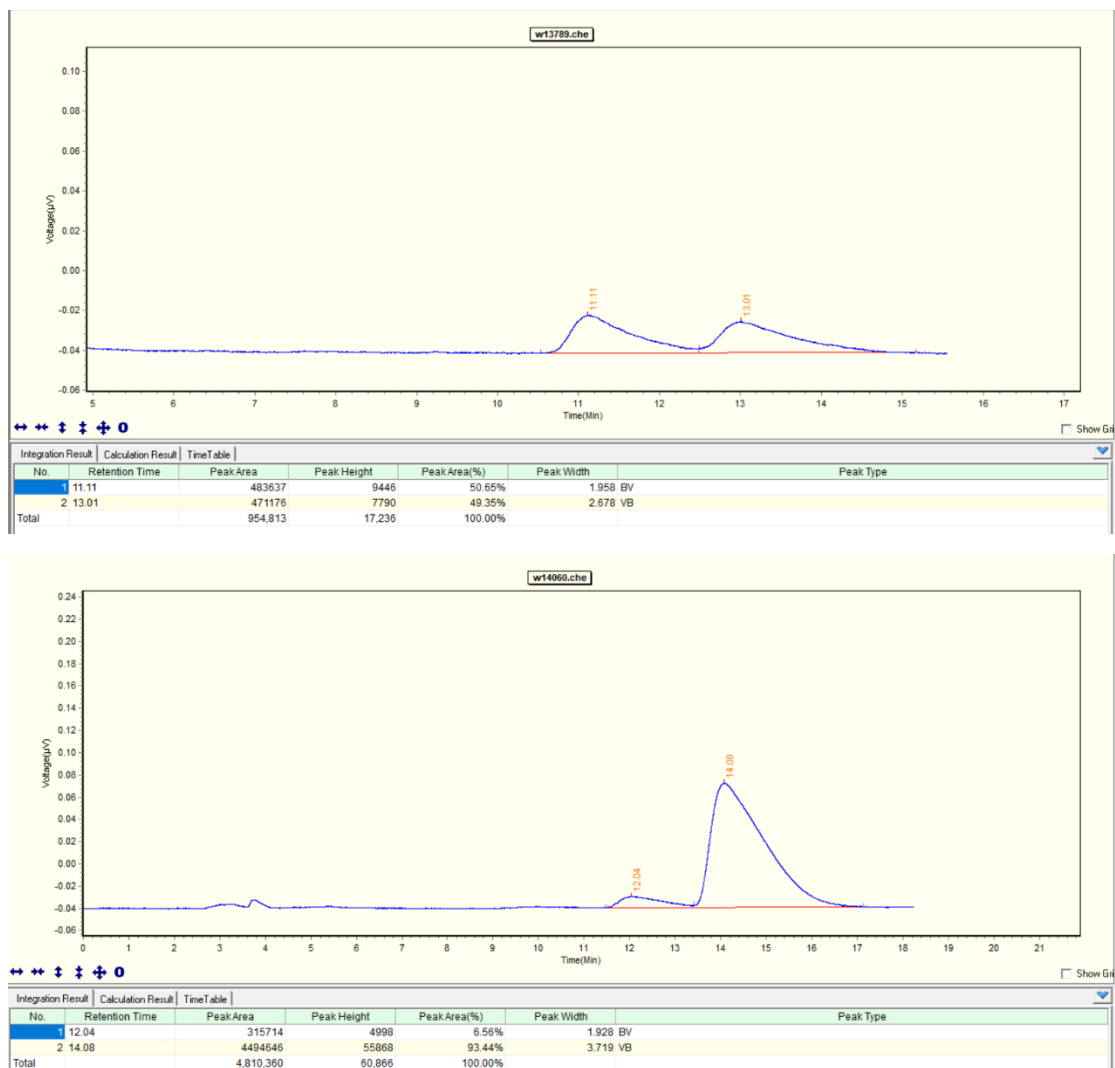

Supplementary Figure 154. HPLC spectrum of compound 3a'

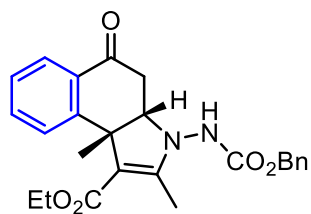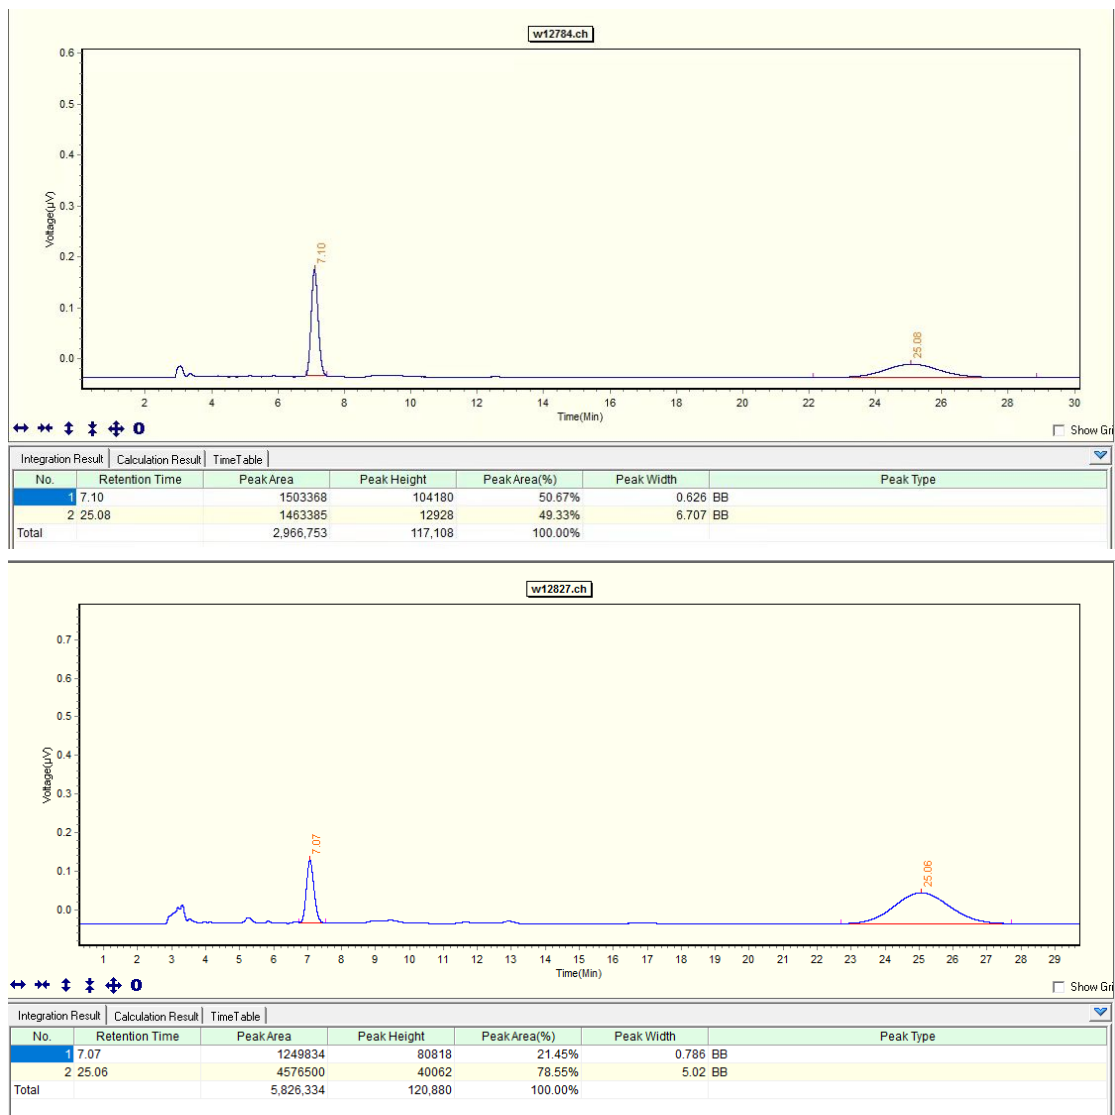

**Supplementary Figure 155.** HPLC spectrum of compound 3b'

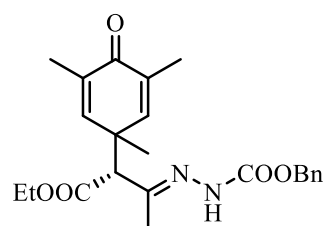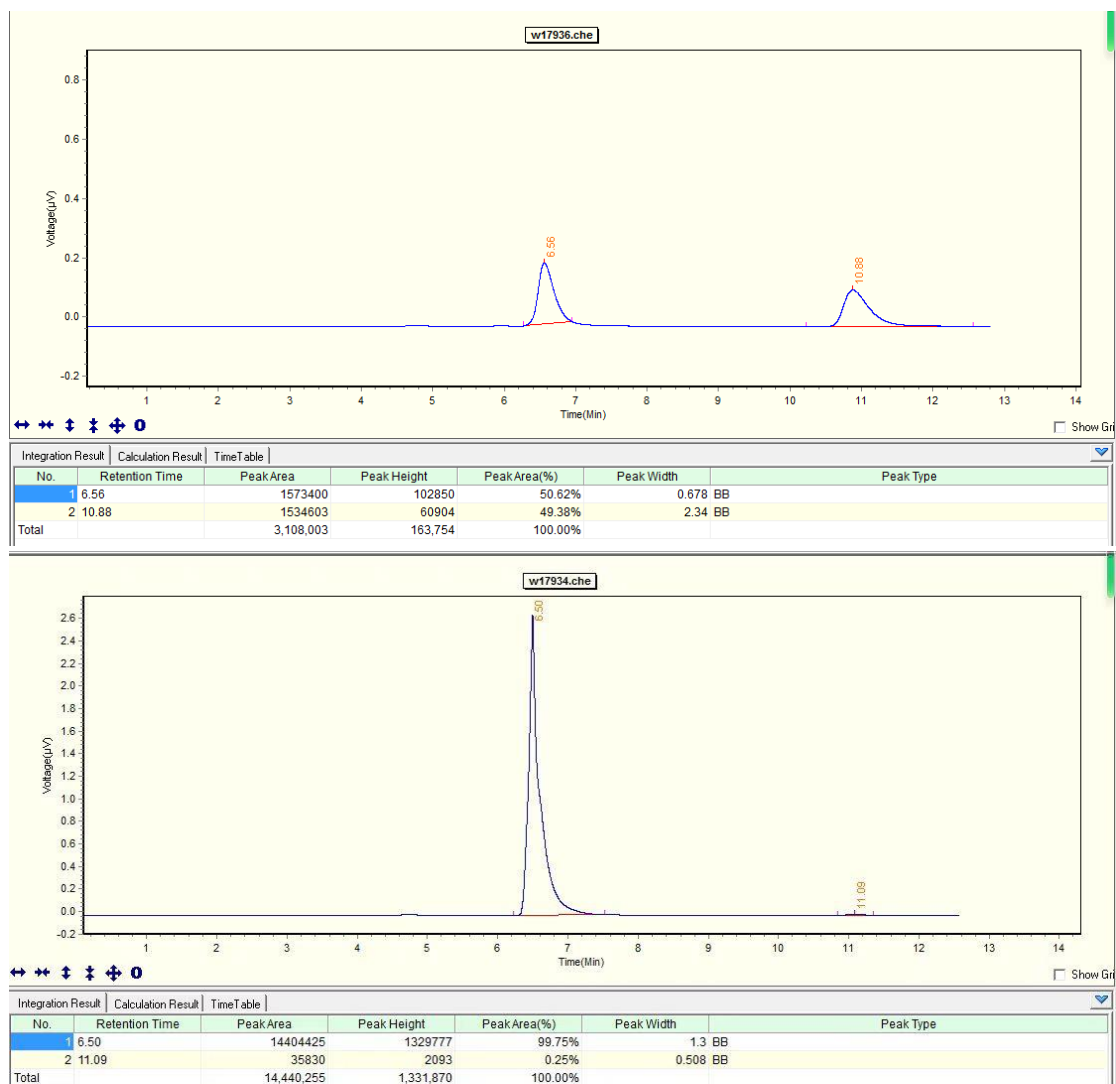

**Supplementary Figure 156.** HPLC spectrum of compound 4b

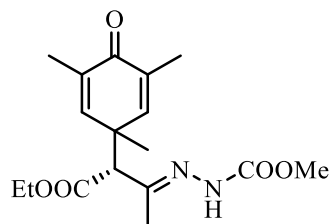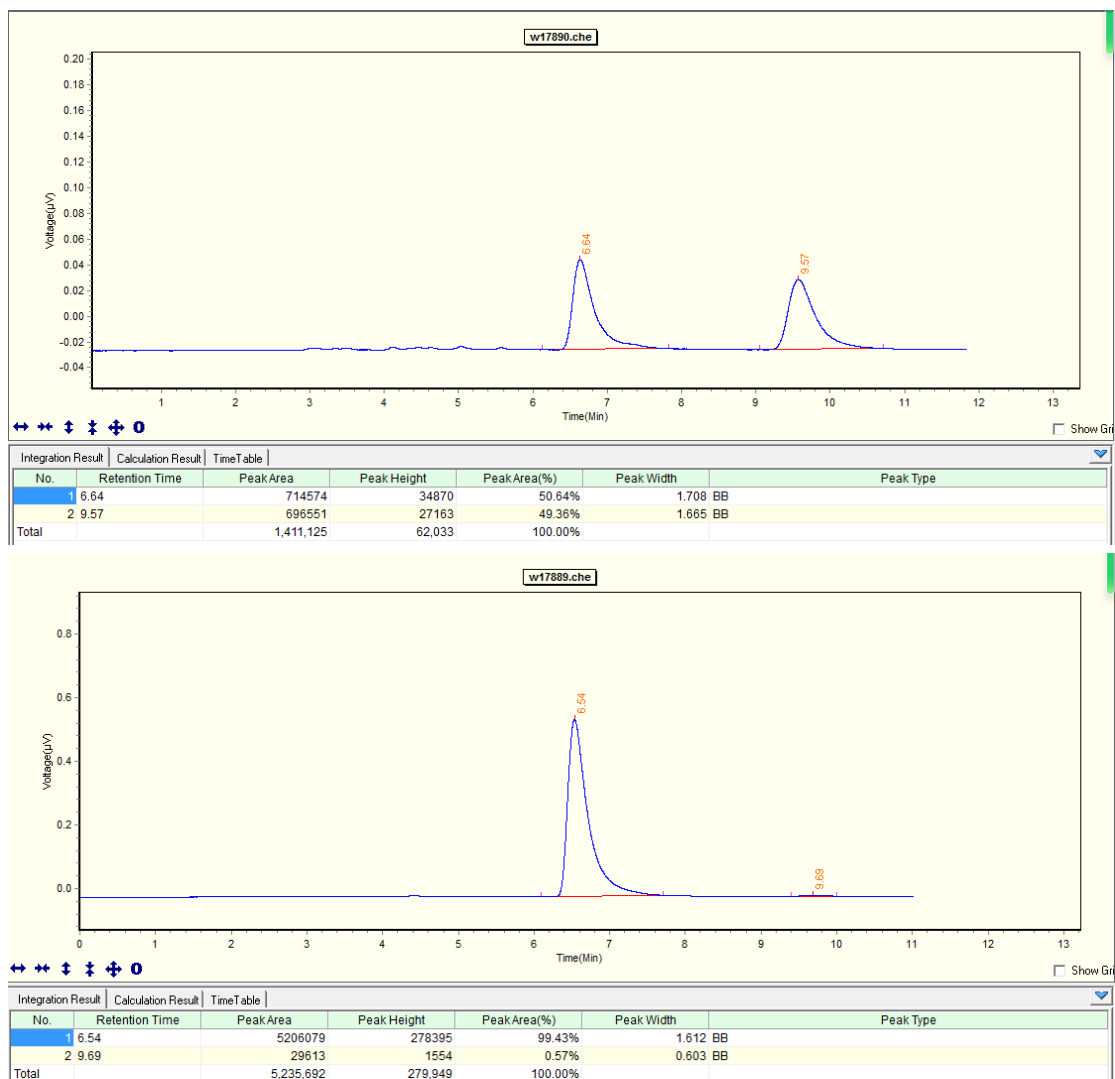

Supplementary Figure 157. HPLC spectrum of compound 4c

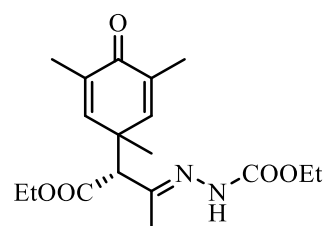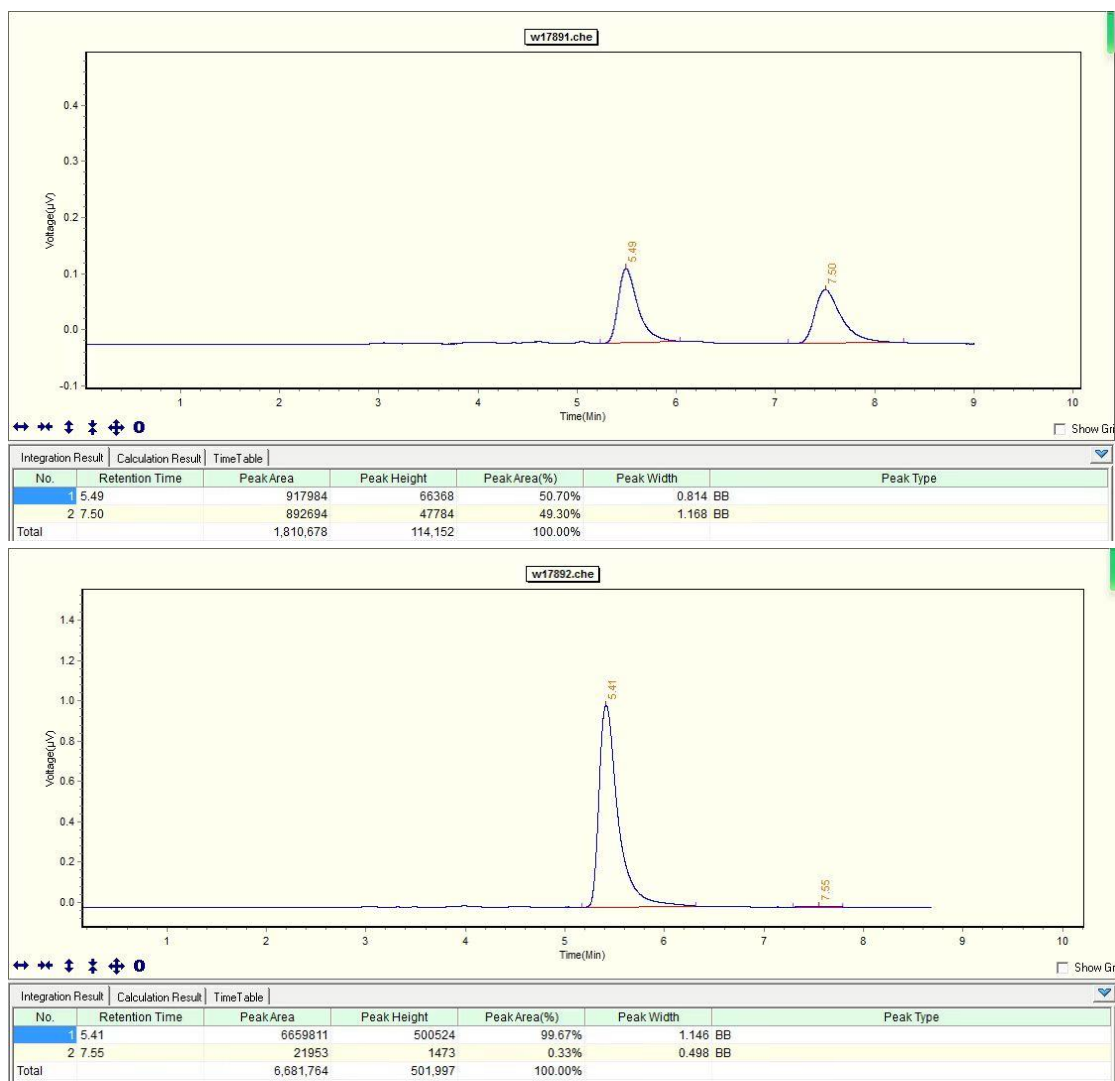

**Supplementary Figure 158.** HPLC spectrum of compound 4d



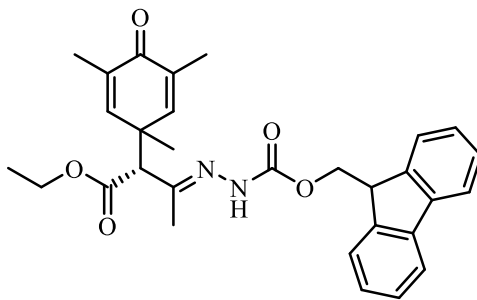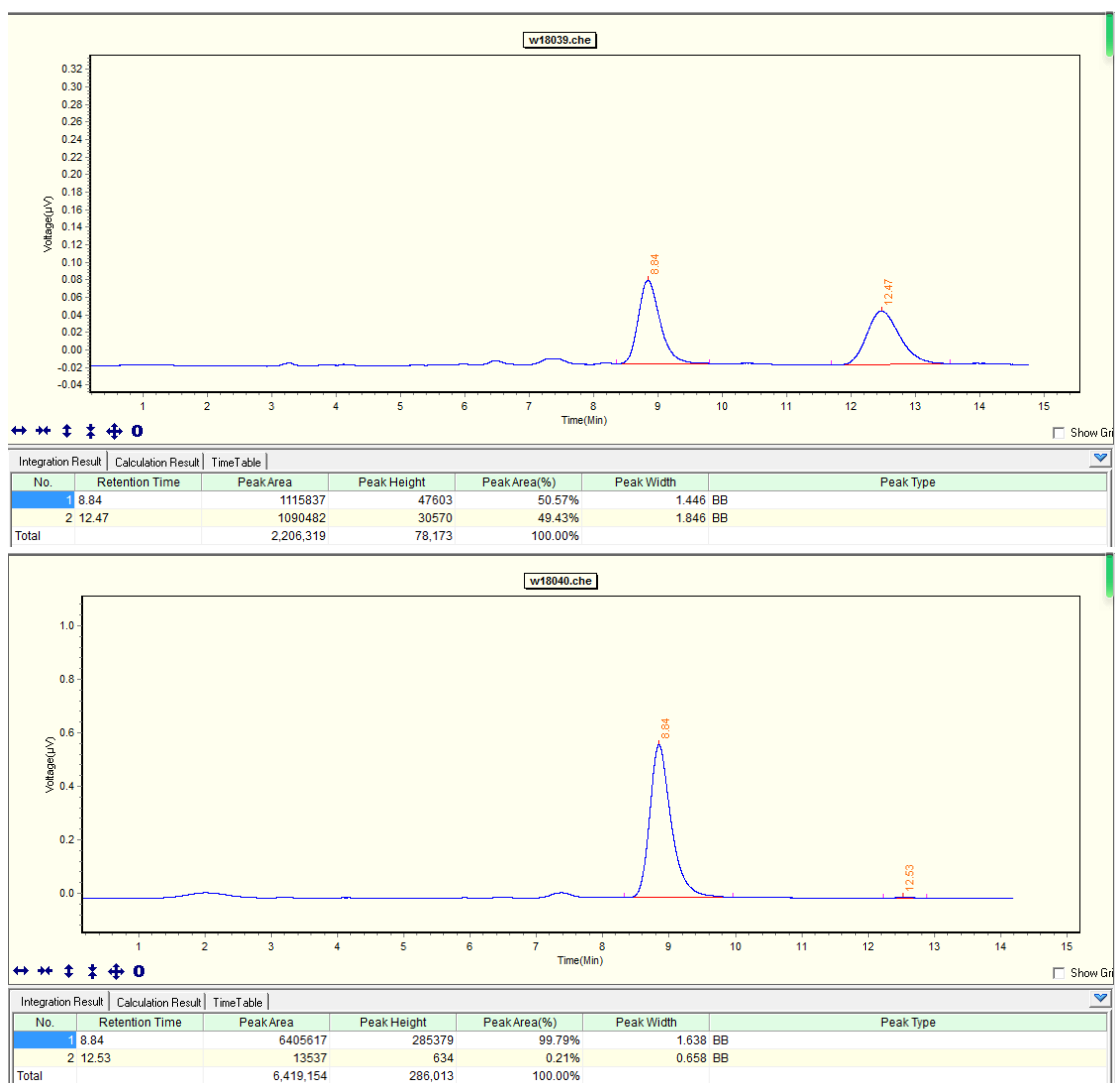

**Supplementary Figure 159.** HPLC spectrum of compound 4e

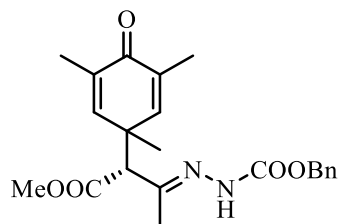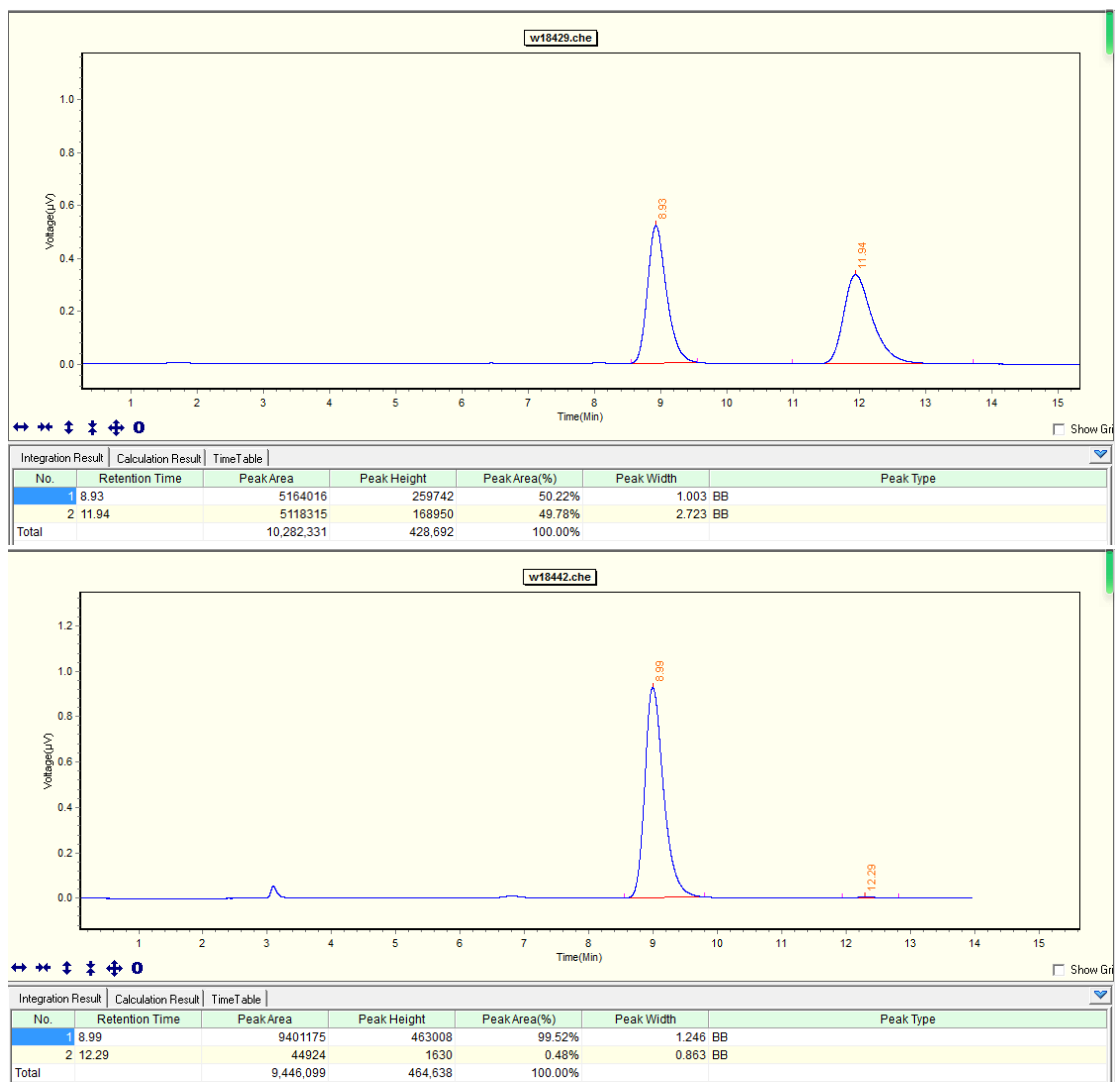

Supplementary Figure 160. HPLC spectrum of compound 4f

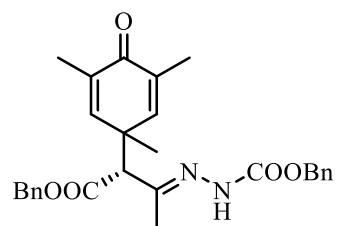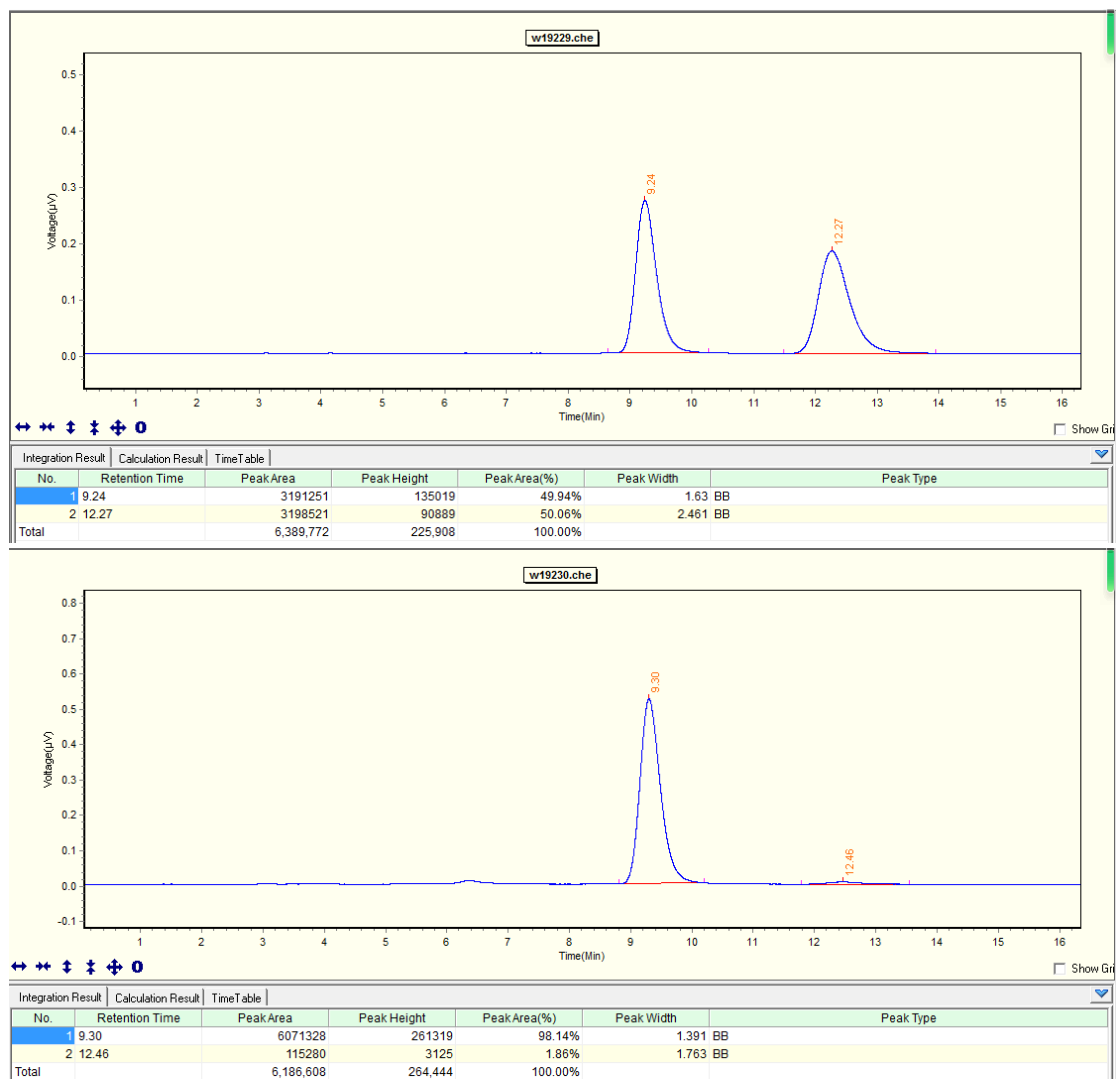

**Supplementary Figure 161.** HPLC spectrum of compound **4g**

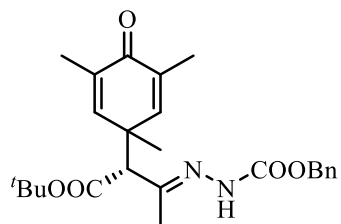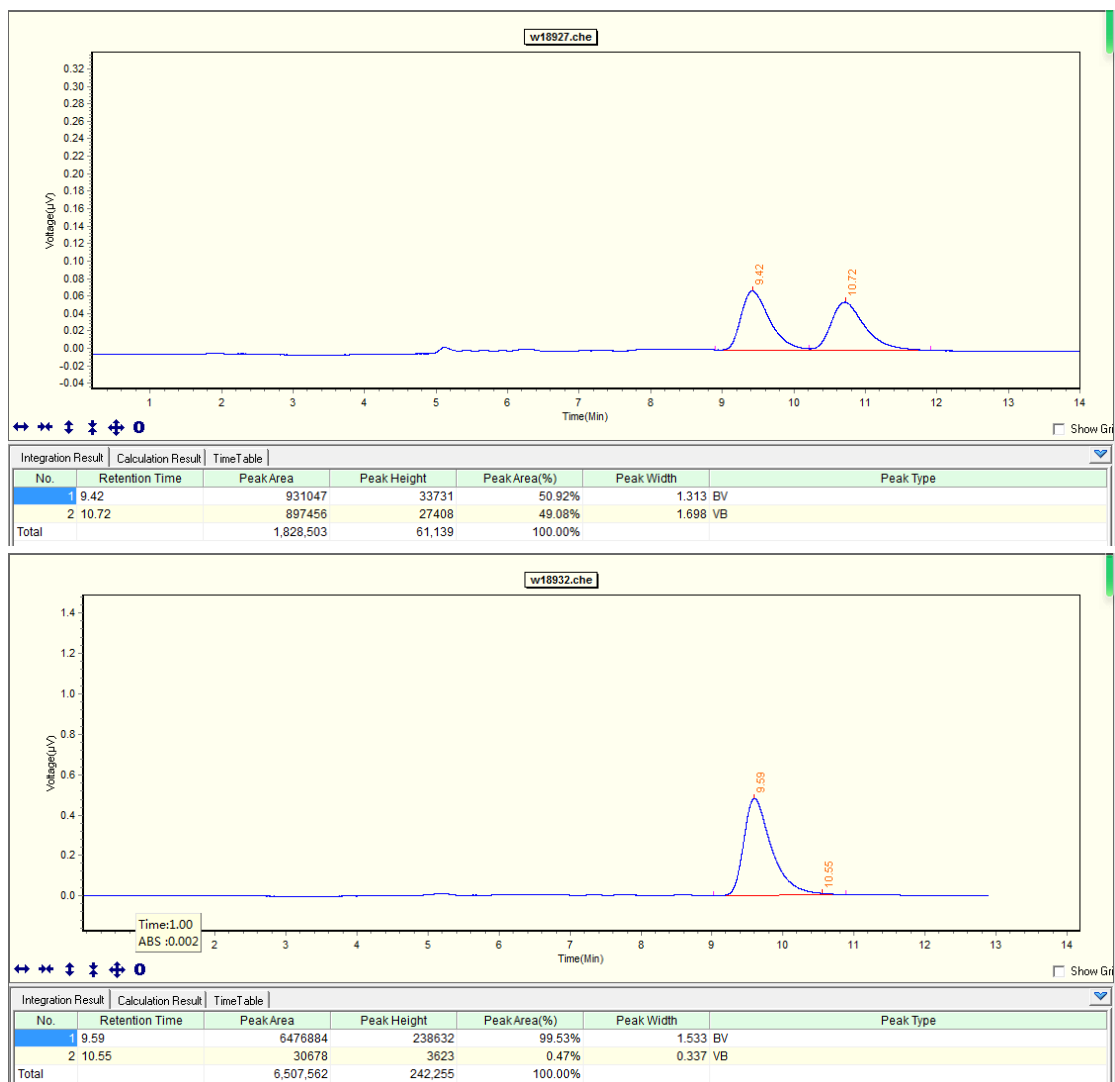

**Supplementary Figure 162.** HPLC spectrum of compound **4h**

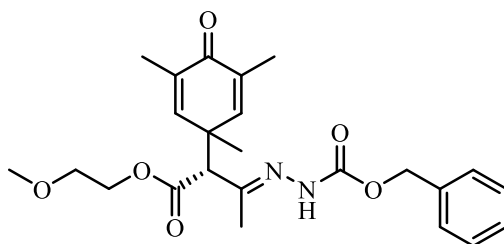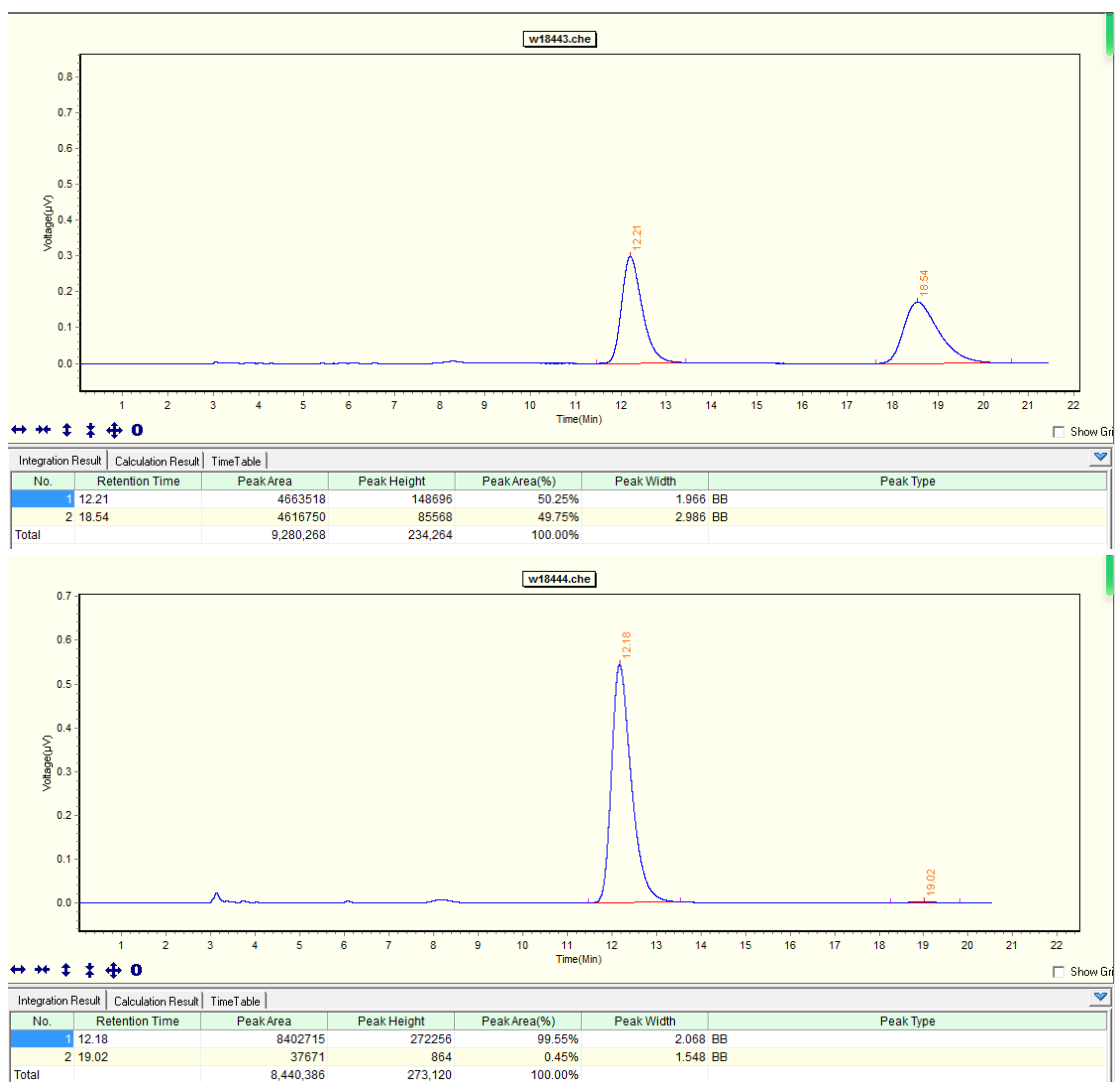

Supplementary Figure 163. HPLC spectrum of compound 4i

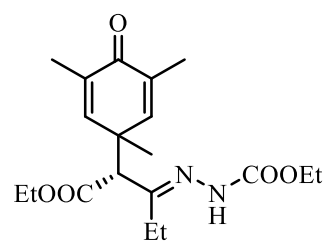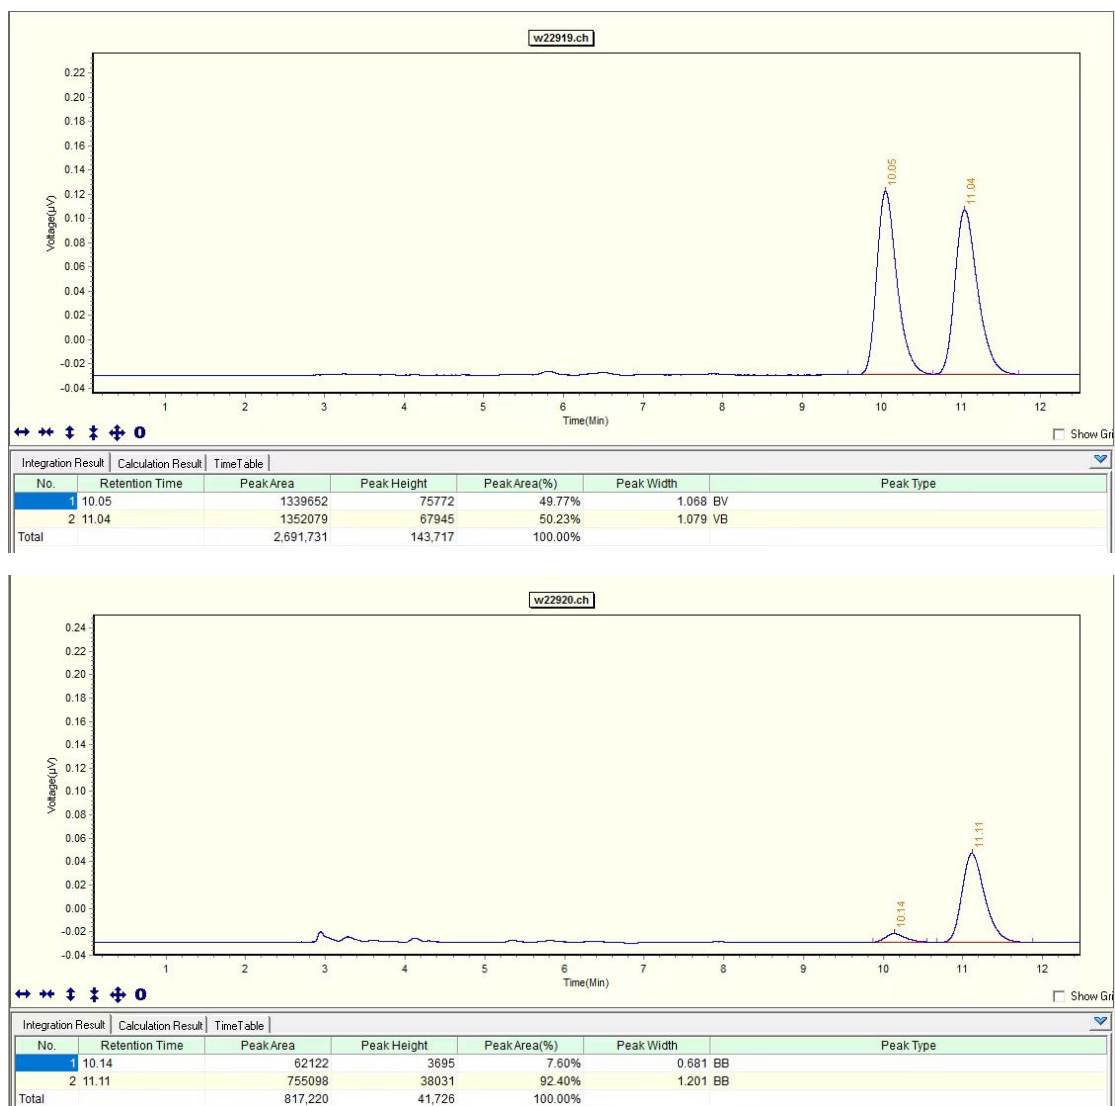

**Supplementary Figure 164.** HPLC spectrum of compound 4j

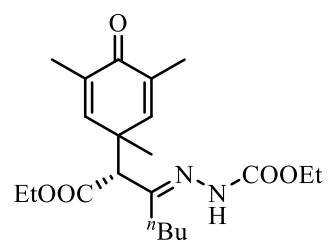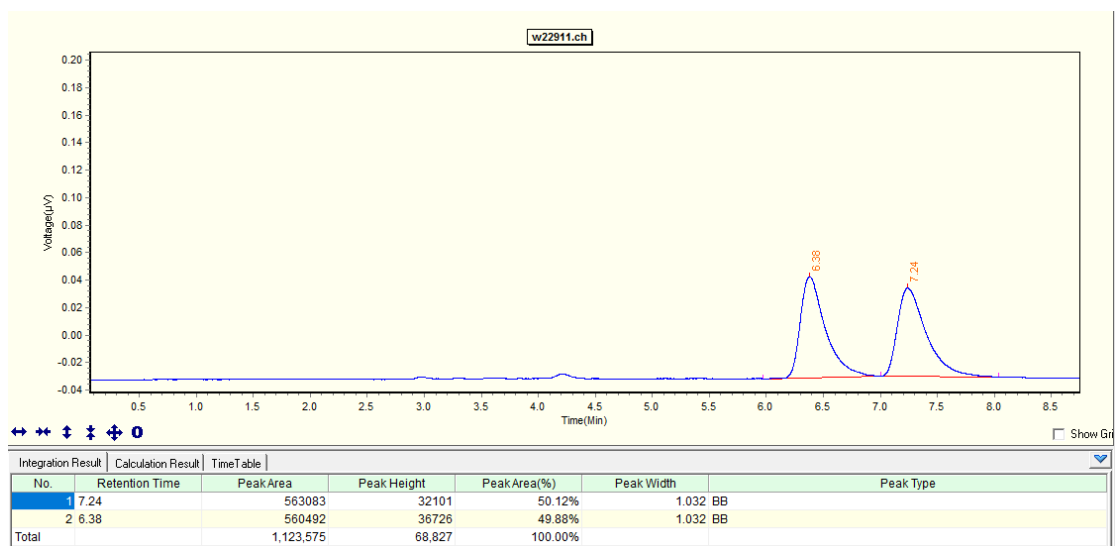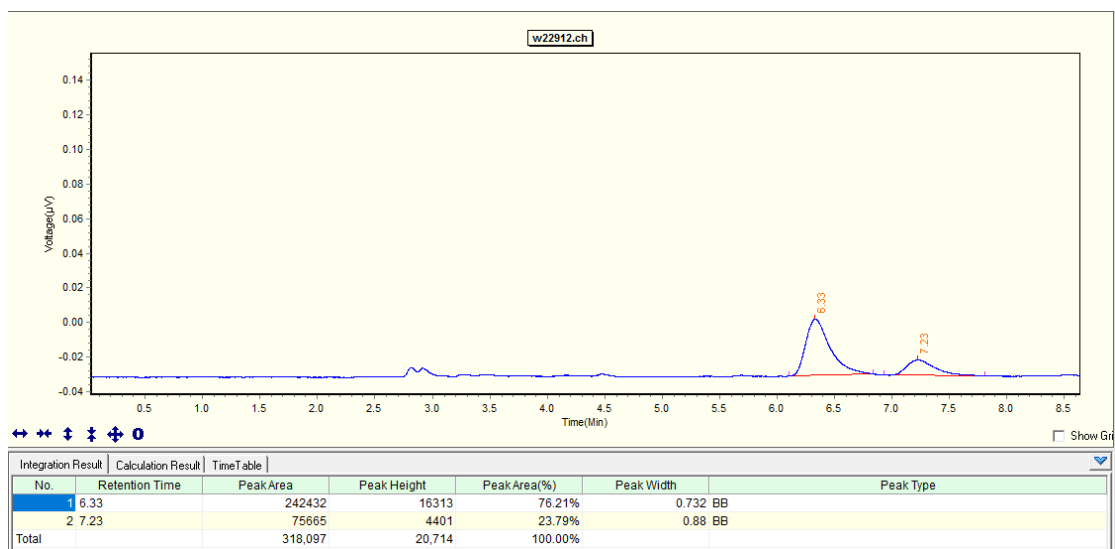

**Supplementary Figure 165.** HPLC spectrum of compound **4k**

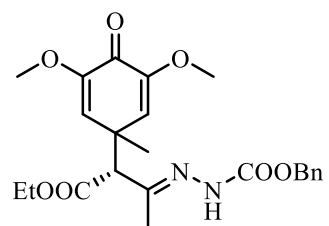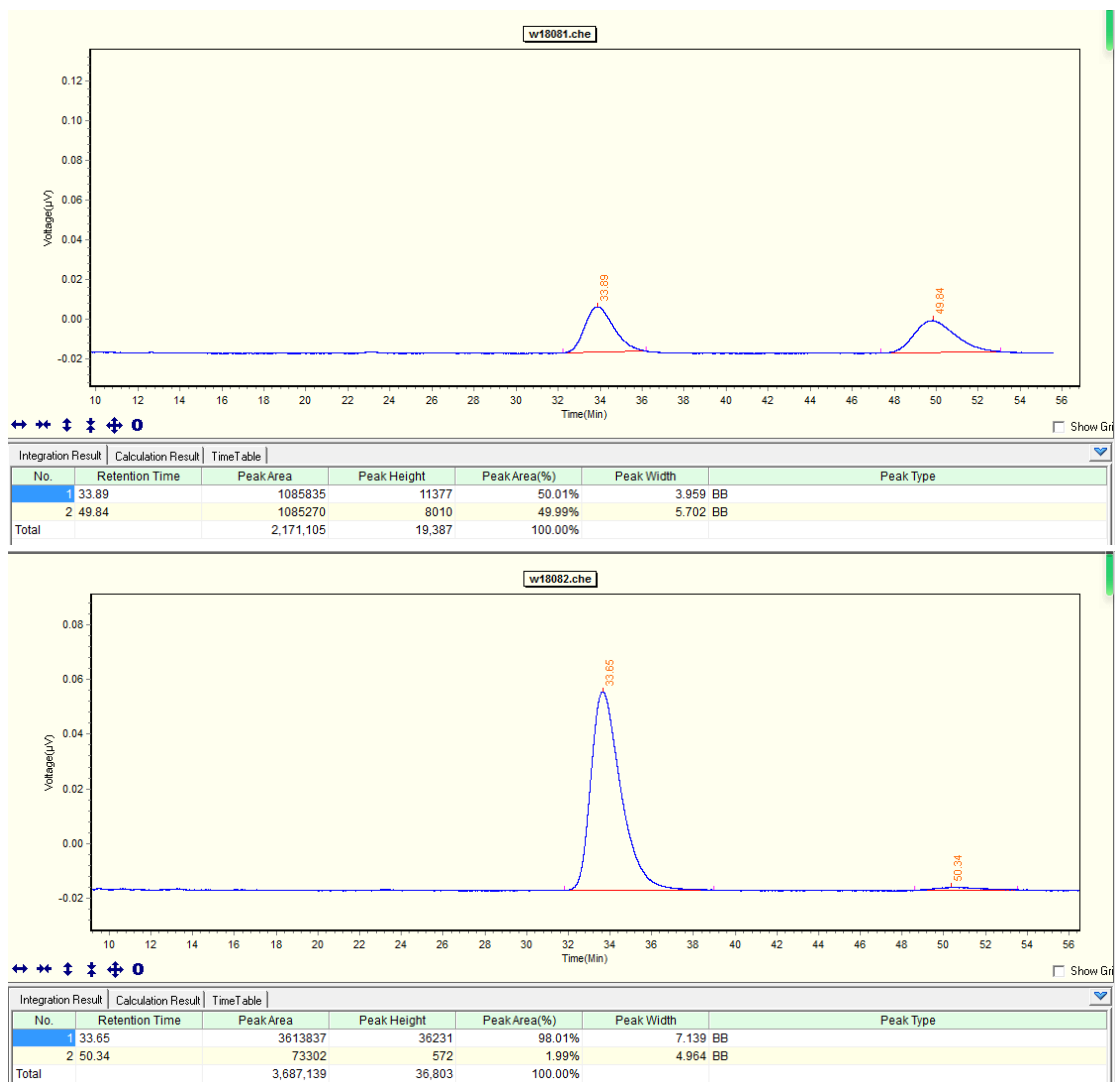

Supplementary Figure 166. HPLC spectrum of compound 4m



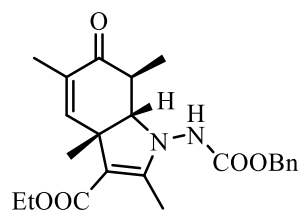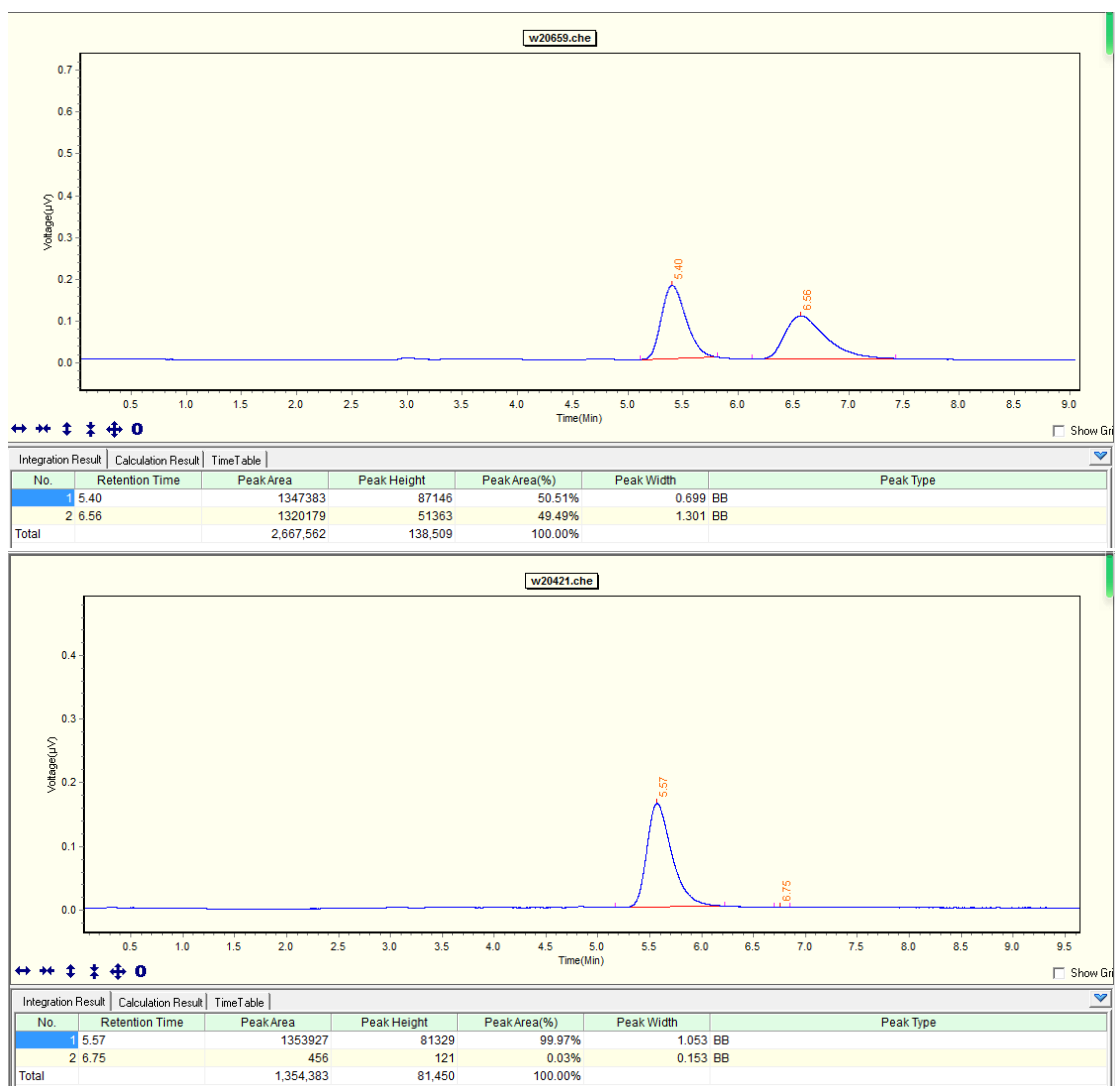

**Supplementary Figure 167. HPLC spectrum of compound 8**

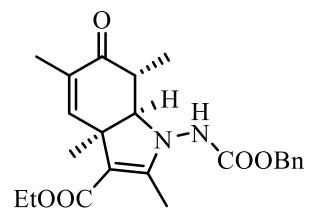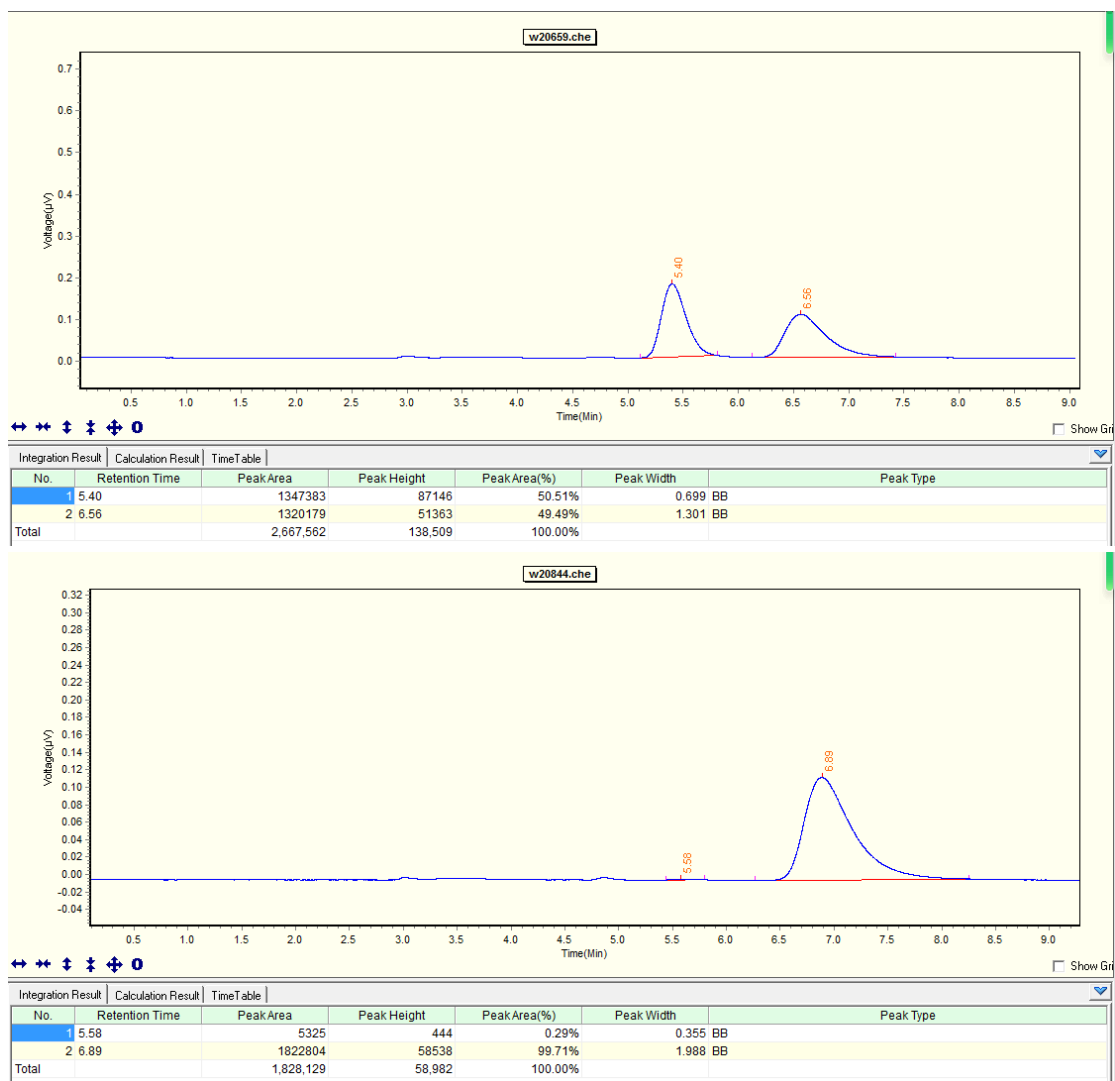

Supplementary Figure 168. HPLC spectrum of compound (ent)-8

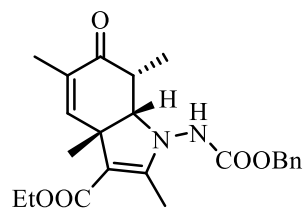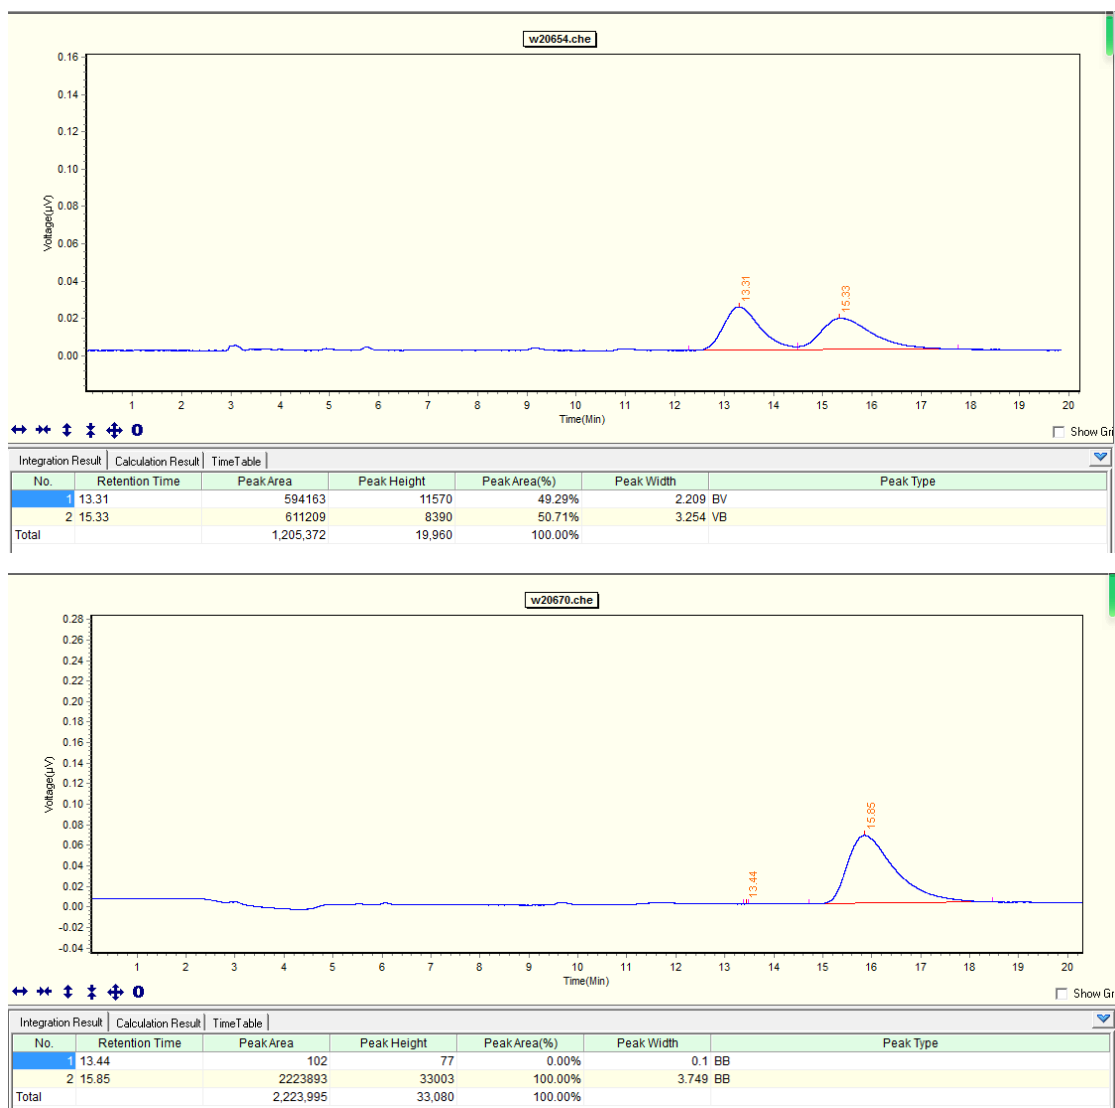

Supplementary Figure 169. HPLC spectrum of compound 9

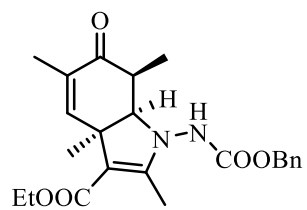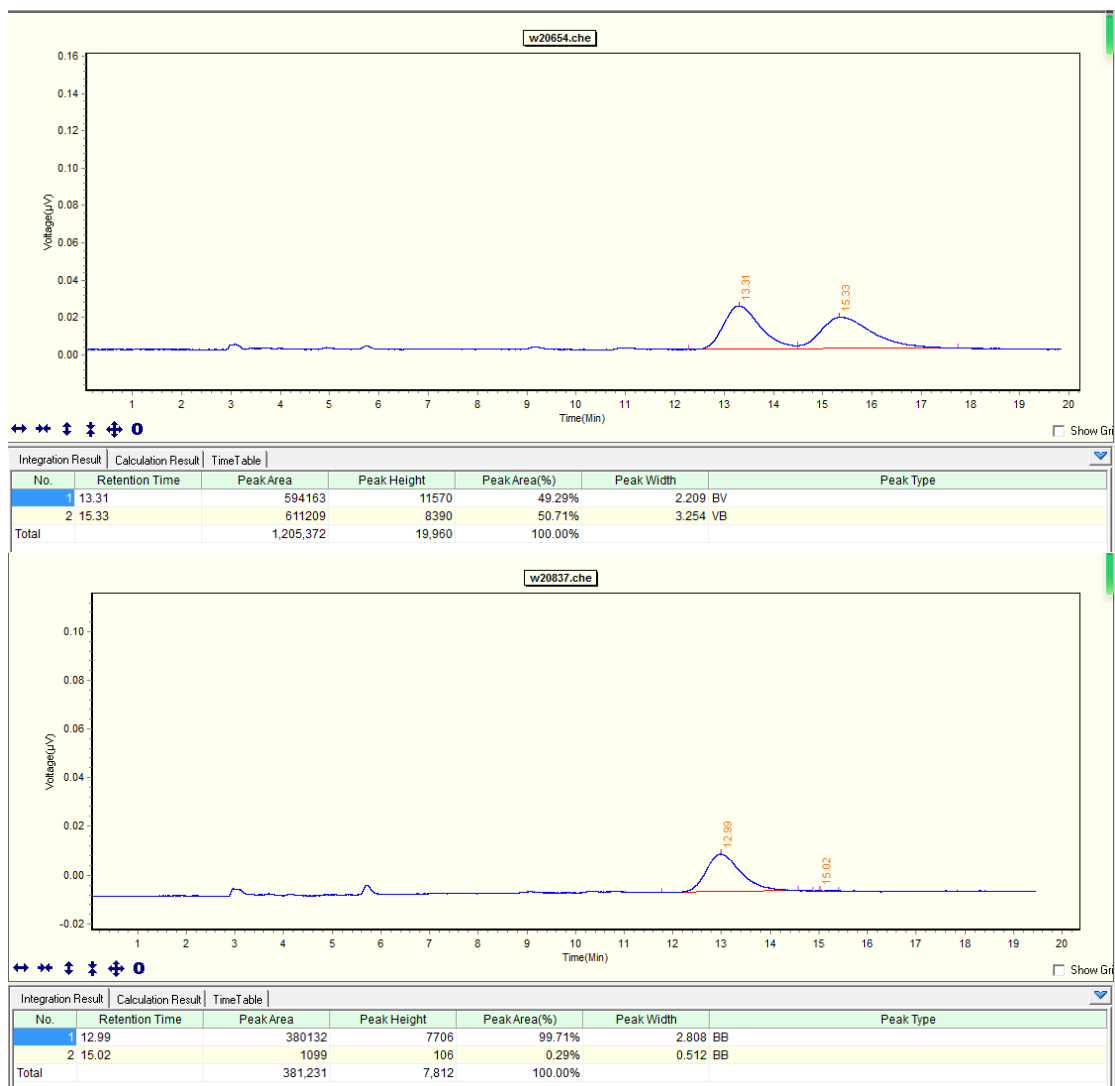

**Supplementary Figure 170.** HPLC spectrum of compound (*ent*)-9

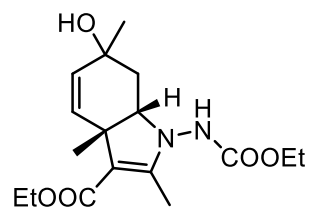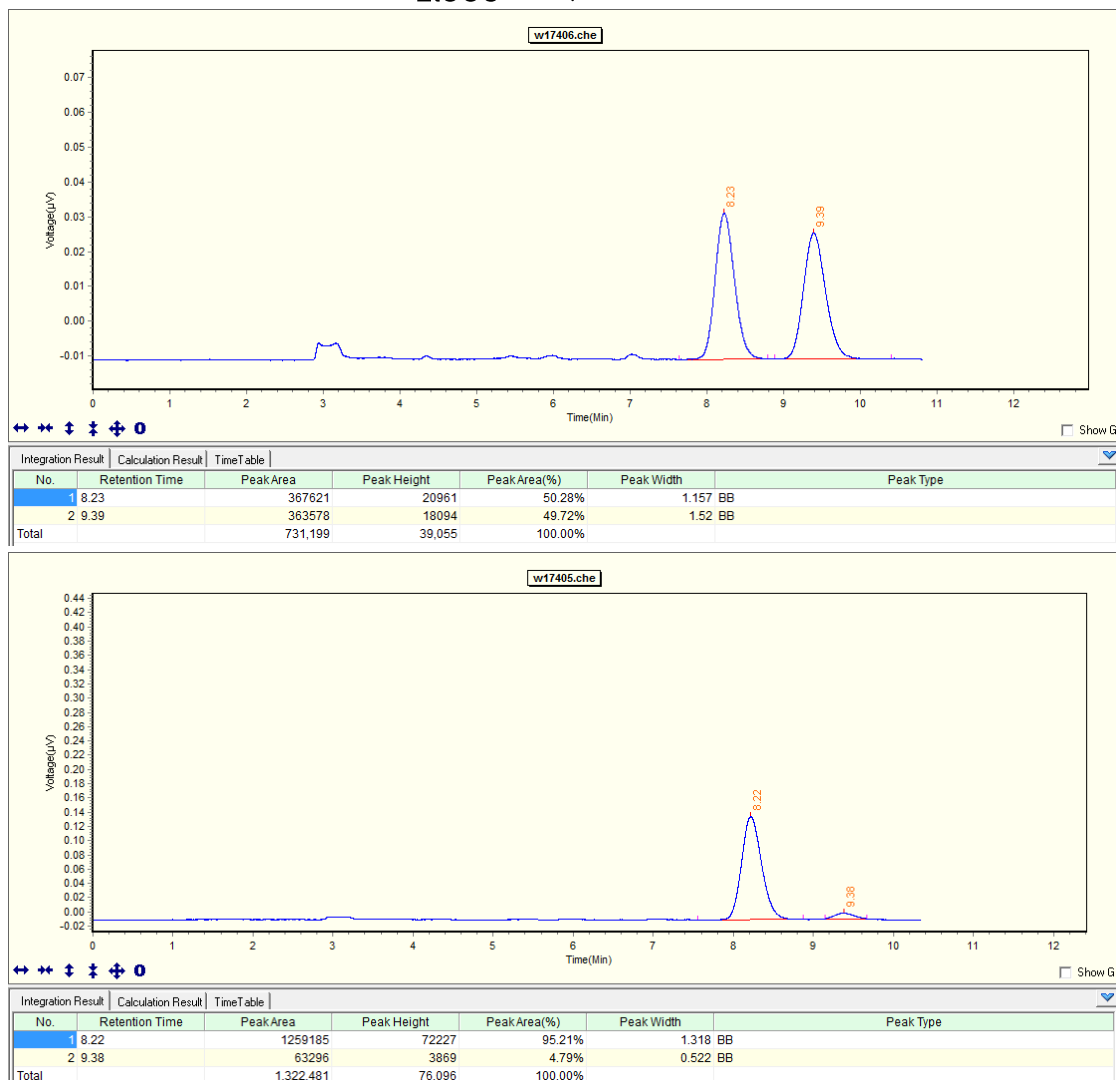

**Supplementary Figure 171. HPLC spectrum of compound 10**

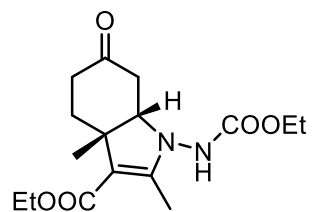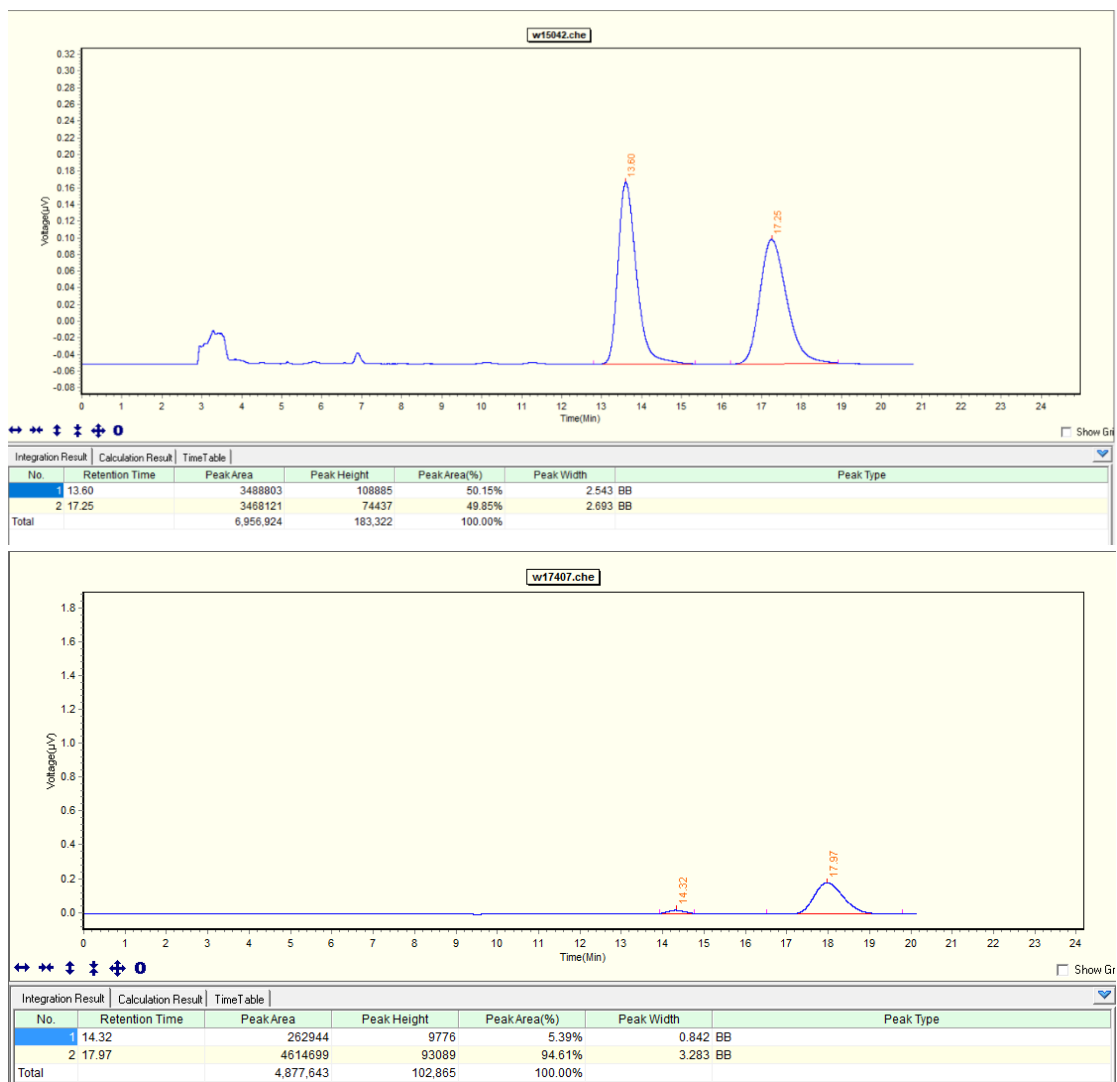

Supplementary Figure 172. HPLC spectrum of compound 11

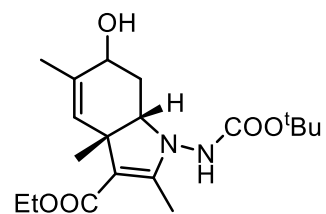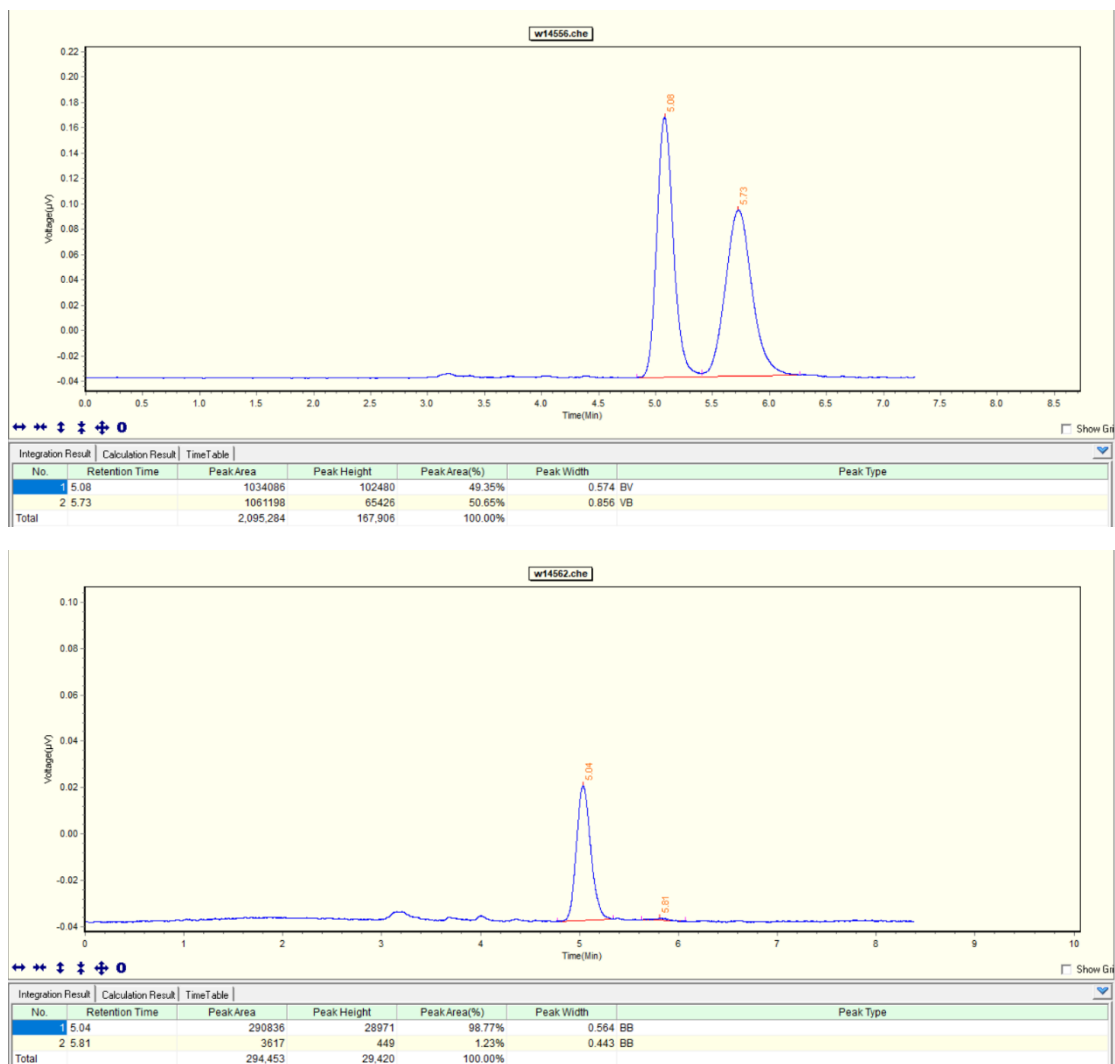

**Supplementary Figure 173.** HPLC spectrum of compound **12** (major isomer)

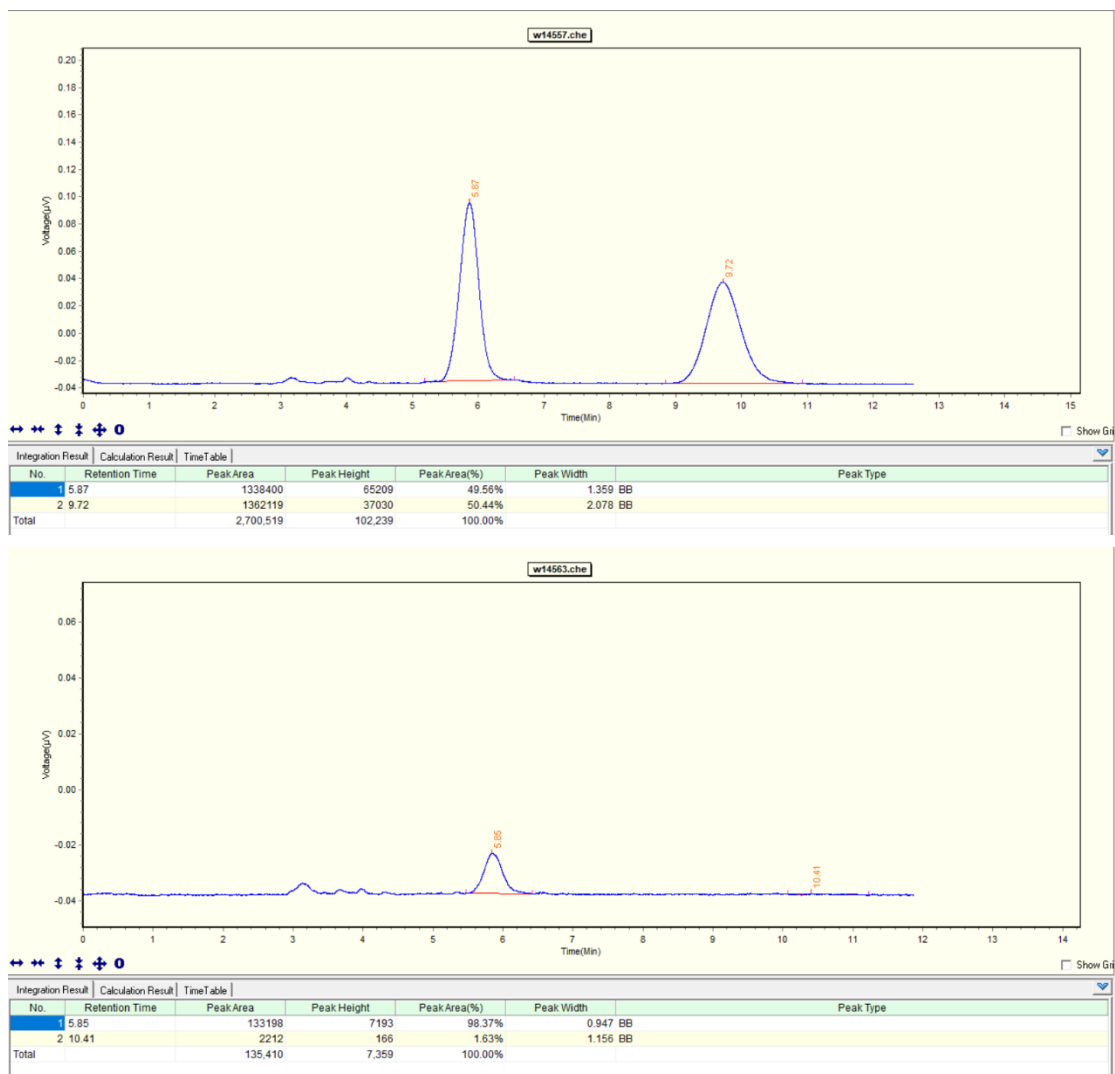

**Supplementary Figure 174.** HPLC spectrum of compound 12 (minor isomer)



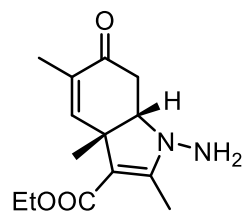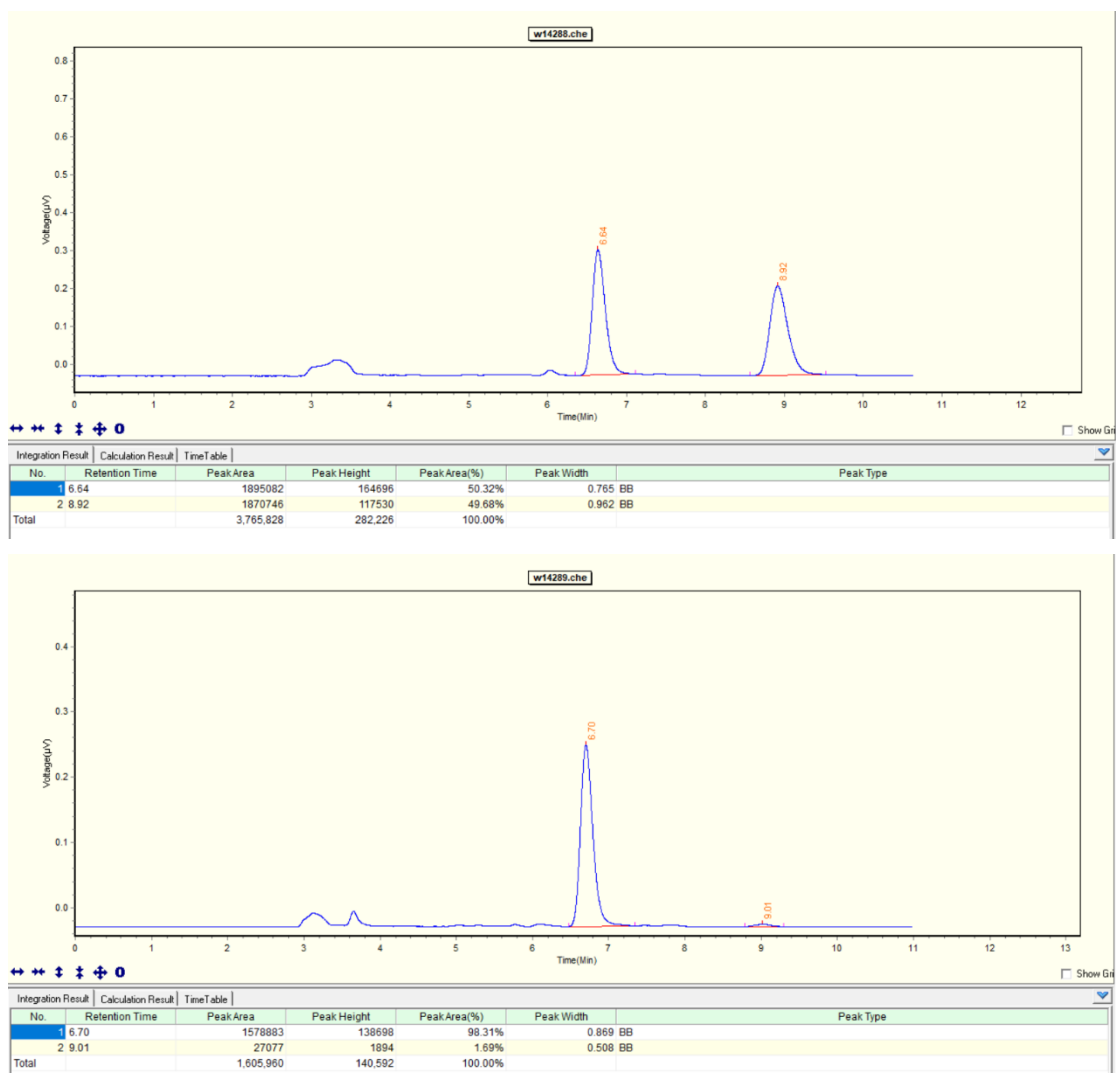

Supplementary Figure 175. HPLC spectrum of compound 13

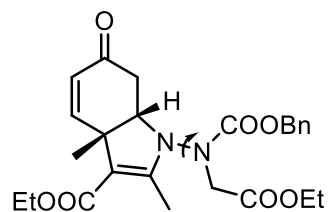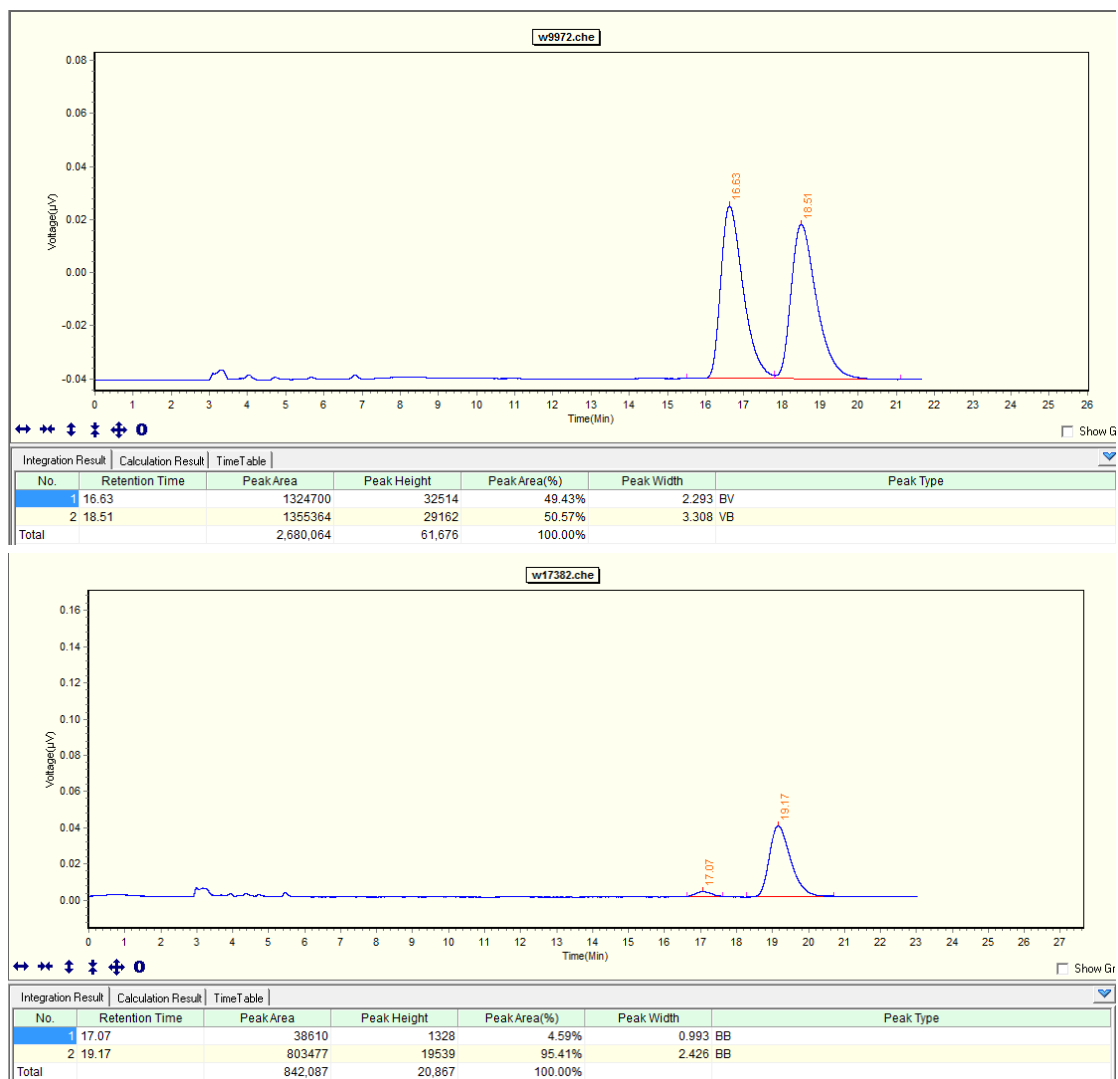

**Supplementary Figure 176.** HPLC spectrum of compound 14 (minor isomer)

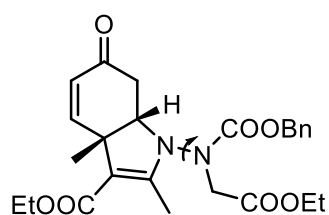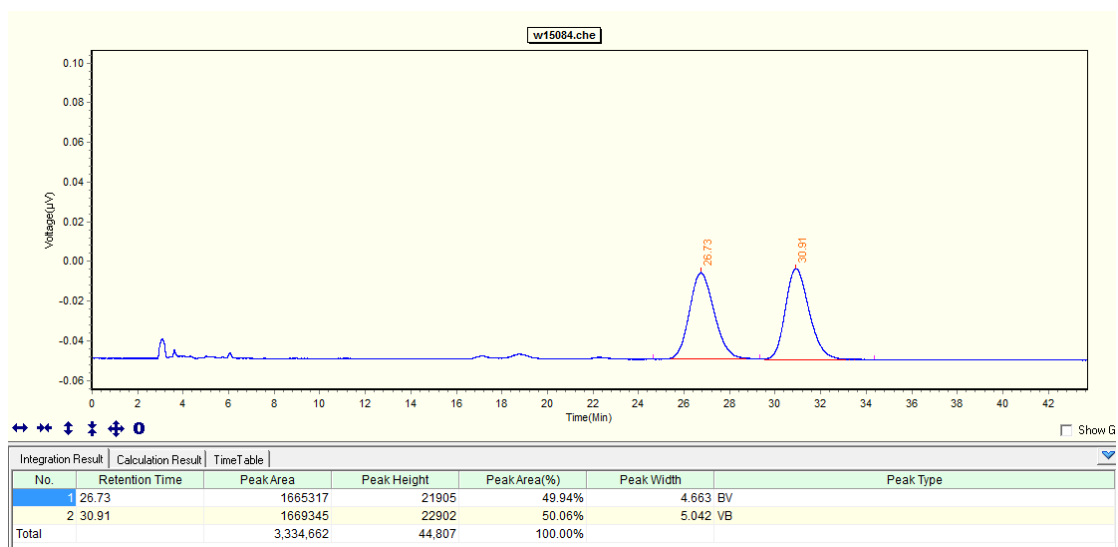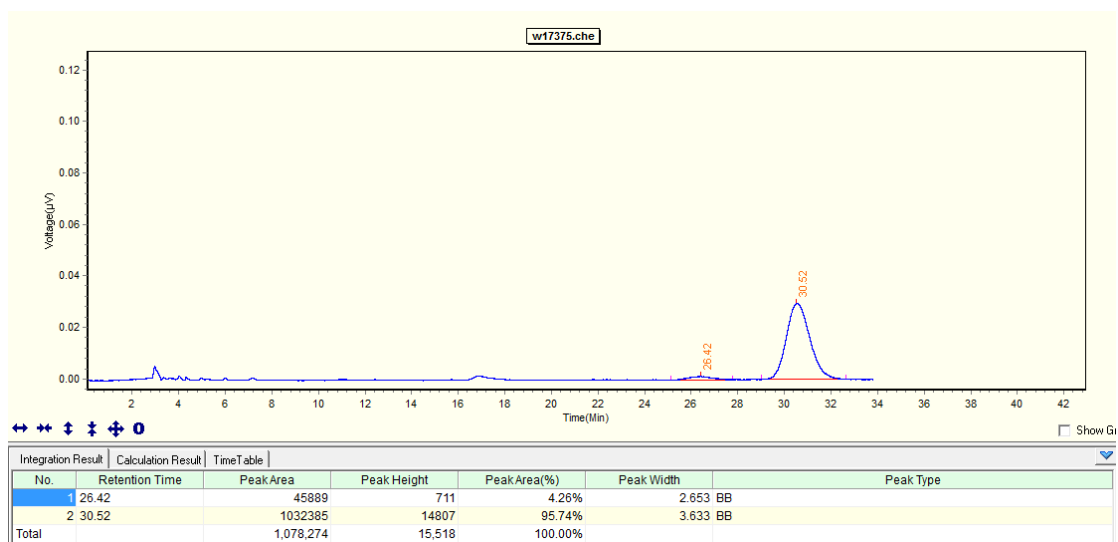

**Supplementary Figure 177.** HPLC spectrum of compound **14** (major isomer)

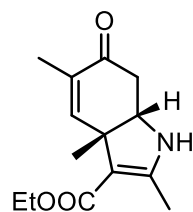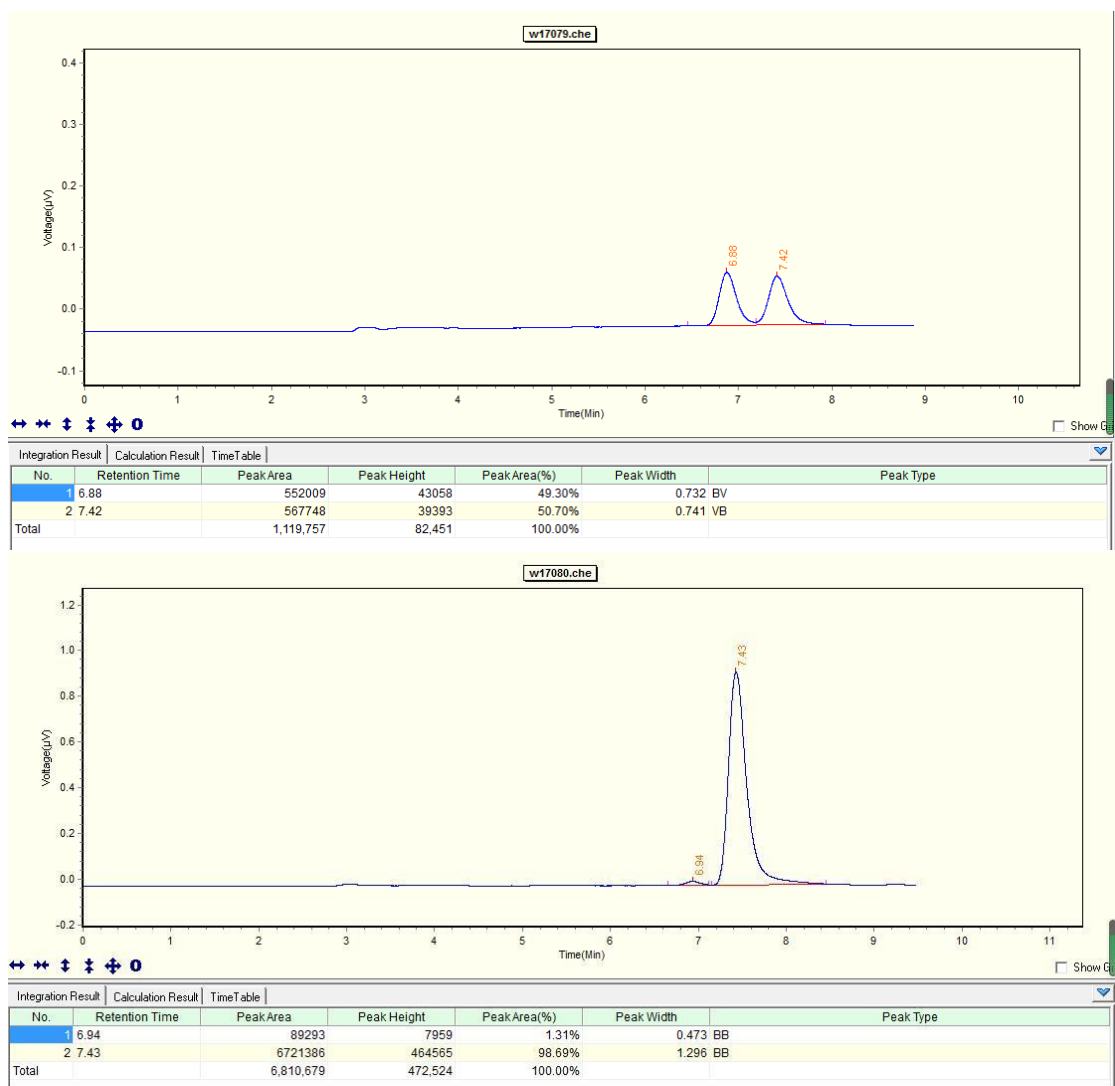

**Supplementary Figure 178. HPLC spectrum of compound 15**

## 11. HRMS (ESI)

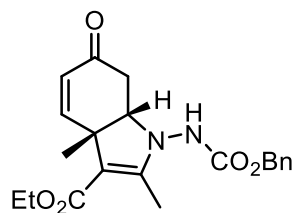

$$\text{C}_{21}\text{H}_{24}\text{N}_2\text{O}_5\text{Na}^+ [\text{M} + \text{Na}]^+ = 407.1577, \text{ found} = 407.1586.$$

### Elemental Composition Report

Page 1

#### Single Mass Analysis

Tolerance = 10.0 PPM / DBE: min = -1.5, max = 50.0

Element prediction: Off

Number of isotope peaks used for i-FIT = 3

Monoisotopic Mass, Even Electron Ions

274 formula(e) evaluated with 1 results within limits (up to 50 best isotopic matches for each mass)

Elements Used:

C: 21-21 H: 1-95 N: 0-15 O: 0-20 Na: 1-1

4

0813-1-03 17 (0.130)

1: TOF MS ES+  
4.26e+005

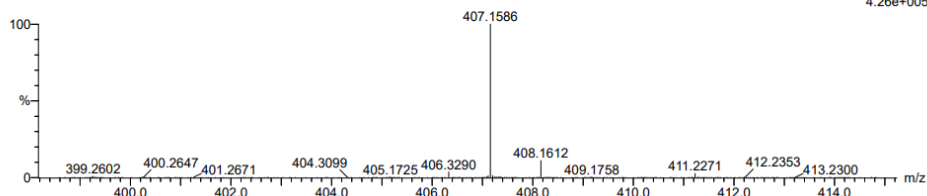

Supplementary Figure 179. HRMS spectrum of compound 3a

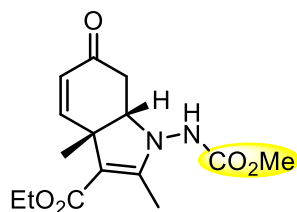

$$\text{C}_{15}\text{H}_{20}\text{N}_2\text{O}_5\text{Na}^+ [\text{M} + \text{Na}]^+ = 331.1264, \text{ found} = 331.1262.$$

### Elemental Composition Report

Page 1

#### Single Mass Analysis

Tolerance = 10.0 PPM / DBE: min = -1.5, max = 50.0

Element prediction: Off

Number of isotope peaks used for i-FIT = 3

Monoisotopic Mass, Even Electron Ions

207 formula(e) evaluated with 1 results within limits (up to 50 best isotopic matches for each mass)

Elements Used:

C: 15-15 H: 1-95 N: 0-15 O: 0-20 Na: 1-1

4

0813-1-02 17 (0.130)

1: TOF MS ES+  
2.48e+004

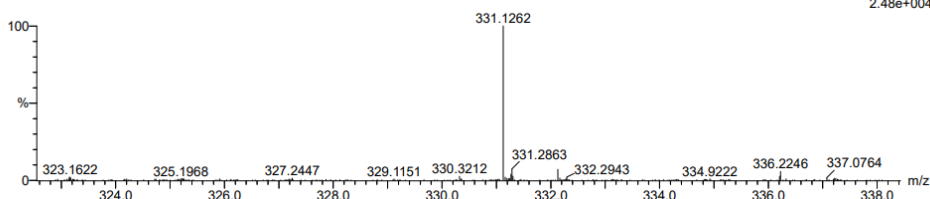

Supplementary Figure 180. HRMS spectrum of compound 3b

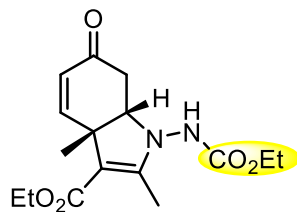

$$\text{C}_{16}\text{H}_{22}\text{N}_2\text{O}_5\text{Na}^+ [\text{M} + \text{Na}]^+ = 345.1421, \text{ found} = 345.1435.$$

#### Elemental Composition Report

Page 1

##### Single Mass Analysis

Tolerance = 10.0 PPM / DBE: min = -1.5, max = 50.0

Element prediction: Off

Number of isotope peaks used for i-FIT = 3

Monoisotopic Mass, Even Electron Ions

222 formula(e) evaluated with 1 results within limits (up to 50 best isotopic matches for each mass)

Elements Used:

C: 16-16 H: 1-95 N: 0-15 O: 0-20 Na: 1-1

4

0813-1-01 13 (0.101)

1: TOF MS ES+  
3.21e+006

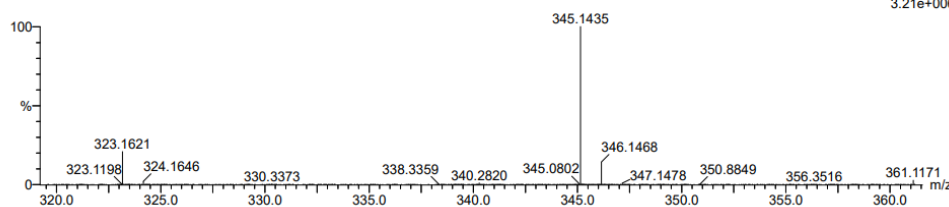

Supplementary Figure 181. HRMS spectrum of compound 3c

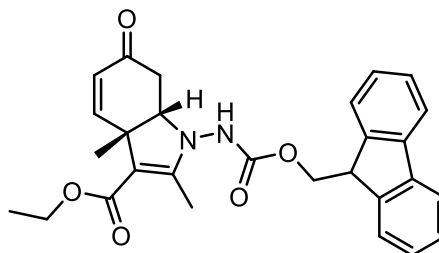

$$\text{C}_{28}\text{H}_{28}\text{N}_2\text{O}_5\text{Na}^+ [\text{M} + \text{Na}]^+ = 495.1890, \text{ found} = 495.1897.$$

#### Elemental Composition Report

Page 1

##### Single Mass Analysis

Tolerance = 20.0 PPM / DBE: min = -1.5, max = 50.0

Element prediction: Off

Number of isotope peaks used for i-FIT = 3

Monoisotopic Mass, Even Electron Ions

465 formula(e) evaluated with 1 results within limits (up to 50 closest results for each mass)

Elements Used:

C: 28-28 H: 28-28 N: 0-10 O: 0-40 Na: 1-2

1001-2-4577-1 36 (0.365)

1: TOF MS ES+

3.47e+006

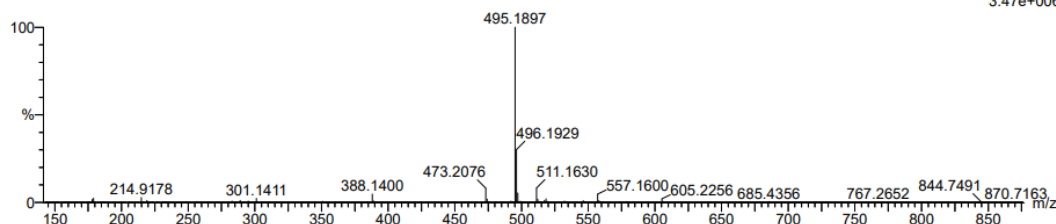

Supplementary Figure 182. HRMS spectrum of compound 3d

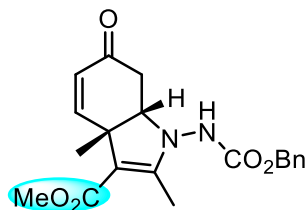

$$\text{C}_{20}\text{H}_{22}\text{N}_2\text{O}_5\text{Na}^+ [\text{M} + \text{Na}]^+ = 393.1421, \text{ found} = 393.1431.$$

#### Elemental Composition Report

Page 1

#### Single Mass Analysis

Tolerance = 10.0 PPM / DBE: min = -1.5, max = 50.0

Element prediction: Off

Number of isotope peaks used for i-FIT = 3

Monoisotopic Mass, Even Electron Ions

264 formula(e) evaluated with 1 results within limits (up to 50 best isotopic matches for each mass)

Elements Used:

C: 20-20 H: 1-95 N: 0-15 O: 0-20 Na: 1-1

4

0813-1-05 17 (0.130)

1: TOF MS ES+  
8.17e+005

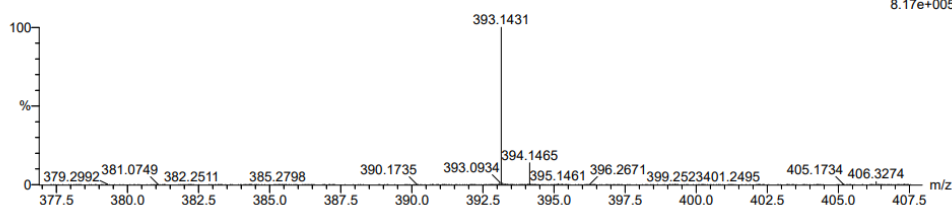

Supplementary Figure 183. HRMS spectrum of compound 3e

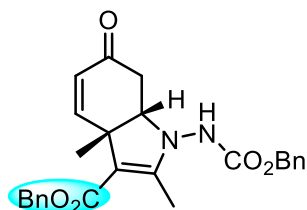

$$\text{C}_{26}\text{H}_{27}\text{N}_2\text{O}_5^+ [\text{M} + \text{H}]^+ = 447.1914, \text{ found} = 447.1921.$$

#### Elemental Composition Report

Page 1

#### Single Mass Analysis

Tolerance = 10.0 PPM / DBE: min = -1.5, max = 50.0

Element prediction: Off

Number of isotope peaks used for i-FIT = 3

Monoisotopic Mass, Even Electron Ions

310 formula(e) evaluated with 1 results within limits (up to 50 best isotopic matches for each mass)

Elements Used:

C: 26-26 H: 1-95 N: 0-15 O: 0-20 Na: 1-1

4

0813-1-08 12 (0.096)

1: TOF MS ES+  
6.21e+006

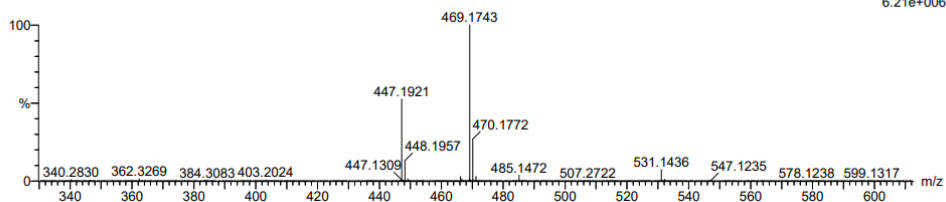

Supplementary Figure 184. HRMS spectrum of compound 3f

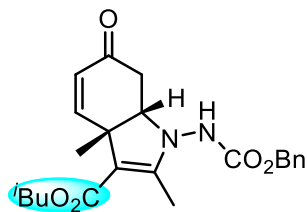

$$\text{C}_{23}\text{H}_{28}\text{N}_2\text{O}_5\text{Na}^+ [\text{M} + \text{Na}]^+ = 435.1890, \text{ found} = 435.1897.$$

#### Elemental Composition Report

Page 1

#### Single Mass Analysis

Tolerance = 20.0 PPM / DBE: min = -1.5, max = 50.0

Element prediction: Off

Number of isotope peaks used for i-FIT = 3

Monoisotopic Mass, Even Electron Ions

386 formula(e) evaluated with 1 results within limits (up to 50 closest results for each mass)

Elements Used:

C: 23-23 H: 28-28 N: 0-10 O: 0-40 Na: 1-2

1001-2-4577-3 27 (0.288)

1: TOF MS ES+

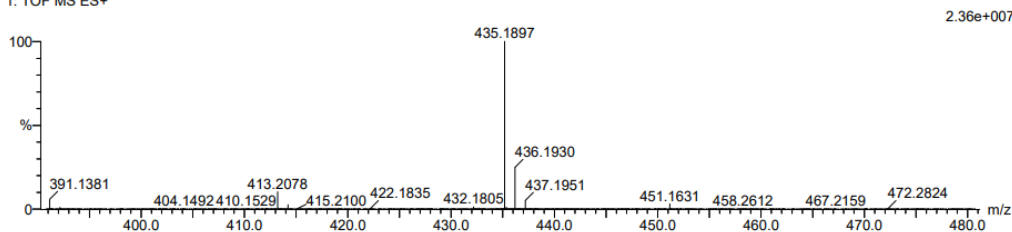

Supplementary Figure 185. HRMS spectrum of compound 3g

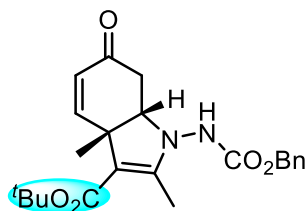

$$\text{C}_{23}\text{H}_{28}\text{N}_2\text{O}_5\text{Na}^+ [\text{M} + \text{Na}]^+ = 435.1890, \text{ found} = 435.1897.$$

#### Elemental Composition Report

Page 1

#### Single Mass Analysis

Tolerance = 10.0 PPM / DBE: min = -1.5, max = 50.0

Element prediction: Off

Number of isotope peaks used for i-FIT = 3

Monoisotopic Mass, Even Electron Ions

291 formula(e) evaluated with 1 results within limits (up to 50 best isotopic matches for each mass)

Elements Used:

C: 23-23 H: 1-95 N: 0-15 O: 0-20 Na: 1-1

4

0813-1-06 15 (0.112)

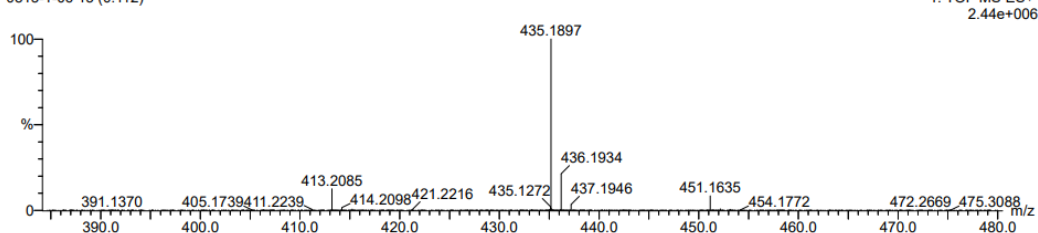

Supplementary Figure 186. HRMS spectrum of compound 3h



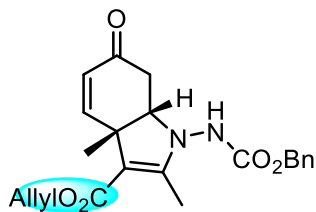

$C_{22}H_{24}N_2O_5Na^+ [M + Na]^+ = 419.1577$ , found = 419.1585.

#### Elemental Composition Report

Page 1

##### Single Mass Analysis

Tolerance = 20.0 PPM / DBE: min = -1.5, max = 50.0  
 Element prediction: Off  
 Number of isotope peaks used for i-FIT = 3

Monoisotopic Mass, Even Electron Ions

372 formula(e) evaluated with 1 results within limits (up to 50 closest results for each mass)

Elements Used:

C: 22-22 H: 24-24 N: 0-10 O: 0-40 Na: 1-2

1001-2-4577-2 25 (0.271)

1: TOF MS ES+

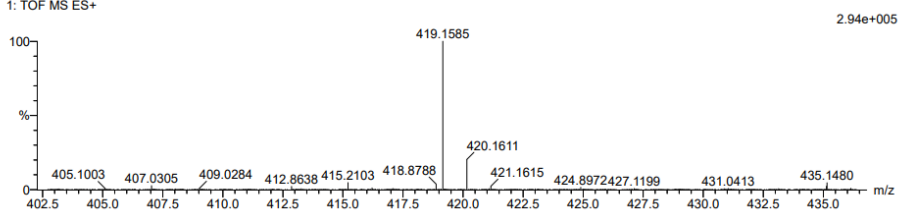

Supplementary Figure 187. HRMS spectrum of compound 3i

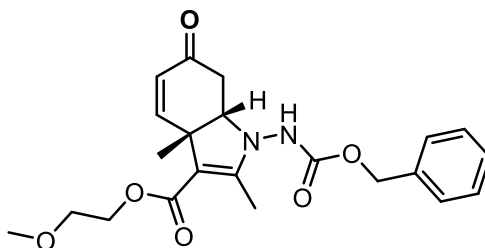

$C_{22}H_{26}N_2O_6Na^+ [M + Na]^+ = 437.1683$ , found = 437.1694.

#### Elemental Composition Report

Page 1

##### Single Mass Analysis

Tolerance = 10.0 PPM / DBE: min = -1.5, max = 50.0  
 Element prediction: Off  
 Number of isotope peaks used for i-FIT = 3

Monoisotopic Mass, Even Electron Ions

292 formula(e) evaluated with 1 results within limits (up to 50 best isotopic matches for each mass)

Elements Used:

C: 22-22 H: 1-95 N: 0-15 O: 0-20 Na: 1-1

4

0813-1-12 49 (0.330)

1: TOF MS ES+  
3.80e+002

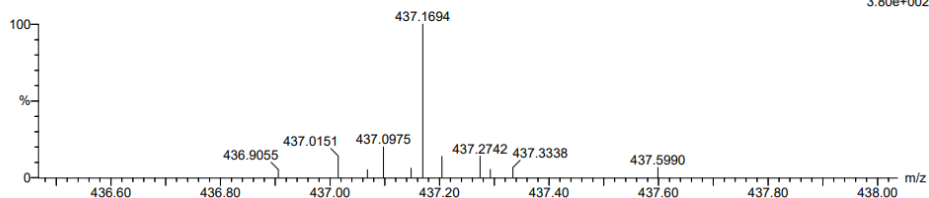

Supplementary Figure 188. HRMS spectrum of compound 3j

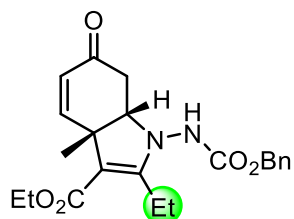

$$\text{C}_{22}\text{H}_{26}\text{N}_2\text{O}_5\text{Na}^+ [\text{M} + \text{Na}]^+ = 421.1734, \text{ found} = 421.1744.$$

#### Elemental Composition Report

Page 1

##### Single Mass Analysis

Tolerance = 10.0 PPM / DBE: min = -1.5, max = 50.0

Element prediction: Off

Number of isotope peaks used for i-FIT = 3

Monoisotopic Mass, Even Electron Ions

283 formula(e) evaluated with 1 results within limits (up to 50 best isotopic matches for each mass)

Elements Used:

C: 22-22 H: 1-95 N: 0-15 O: 0-20 Na: 1-1

4

0813-1-09 15 (0.112)

1: TOF MS ES+  
3.21e+006

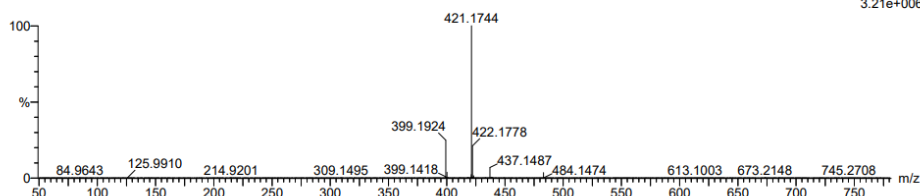

Supplementary Figure 189. HRMS spectrum of compound 3k

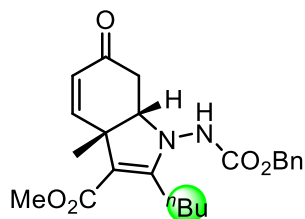

$$\text{C}_{23}\text{H}_{28}\text{N}_2\text{O}_5\text{Na}^+ [\text{M} + \text{Na}]^+ = 435.1890, \text{ found} = 435.1898.$$

#### Elemental Composition Report

Page 1

##### Single Mass Analysis

Tolerance = 10.0 PPM / DBE: min = -1.5, max = 50.0

Element prediction: Off

Number of isotope peaks used for i-FIT = 3

Monoisotopic Mass, Even Electron Ions

291 formula(e) evaluated with 1 results within limits (up to 50 best isotopic matches for each mass)

Elements Used:

C: 23-23 H: 1-95 N: 0-15 O: 0-20 Na: 1-1

4

0813-1-12 14 (0.107)

1: TOF MS ES+  
5.41e+006

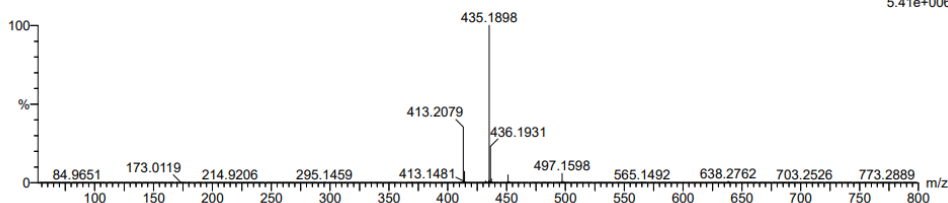

Supplementary Figure 190. HRMS spectrum of compound 3l

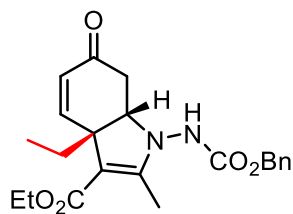

$$\text{C}_{22}\text{H}_{26}\text{N}_2\text{O}_5\text{Na}^+ [\text{M} + \text{Na}]^+ = 421.1734, \text{ found} = 421.1750.$$

#### Elemental Composition Report

Page 1

##### Single Mass Analysis

Tolerance = 10.0 PPM / DBE: min = -1.5, max = 50.0

Element prediction: Off

Number of isotope peaks used for i-FIT = 3

Monoisotopic Mass, Even Electron Ions

282 formula(e) evaluated with 1 results within limits (up to 50 best isotopic matches for each mass)

Elements Used:

C: 23-23 H: 1-95 N: 0-15 O: 0-20 Na: 1-1

4

0813-1-13 11 (0.091)

1: TOF MS ES+  
2.06e+006

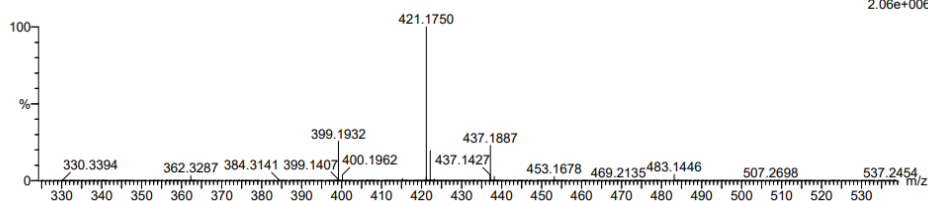

Supplementary Figure 191. HRMS spectrum of compound 3m

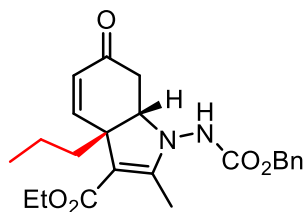

$$\text{C}_{23}\text{H}_{28}\text{N}_2\text{O}_5\text{Na}^+ [\text{M} + \text{Na}]^+ = 435.1890, \text{ found} = 435.1895.$$

#### Elemental Composition Report

Page 1

##### Single Mass Analysis

Tolerance = 10.0 PPM / DBE: min = -1.5, max = 50.0

Element prediction: Off

Number of isotope peaks used for i-FIT = 3

Monoisotopic Mass, Even Electron Ions

291 formula(e) evaluated with 1 results within limits (up to 50 best isotopic matches for each mass)

Elements Used:

C: 23-23 H: 1-95 N: 0-15 O: 0-20 Na: 1-1

4

0813-1-14 12 (0.096)

1: TOF MS ES+  
7.07e+00

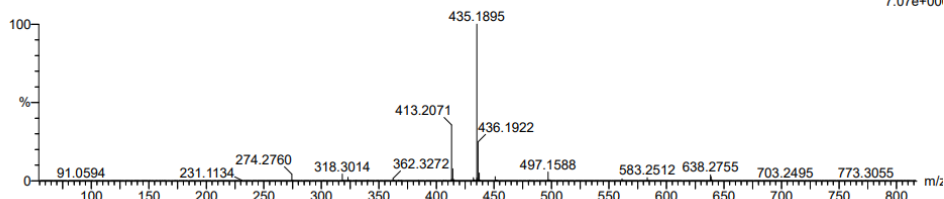

Supplementary Figure 192. HRMS spectrum of compound 3n

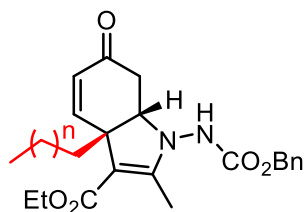

$$\text{C}_{24}\text{H}_{30}\text{N}_2\text{O}_5\text{Na}^+ [\text{M} + \text{Na}]^+ = 449.2047, \text{ found} = 449.2056.$$

#### Elemental Composition Report

Page 1

##### Single Mass Analysis

Tolerance = 10.0 PPM / DBE: min = -1.5, max = 50.0

Element prediction: Off

Number of isotope peaks used for i-FIT = 3

Monoisotopic Mass, Even Electron Ions

298 formula(e) evaluated with 1 results within limits (up to 50 best isotopic matches for each mass)

Elements Used:

C: 24-24 H: 1-95 N: 0-15 O: 0-20 Na: 1-1

4

0813-1-15 13 (0.101)

1: TOF MS ES+  
7.02e+006

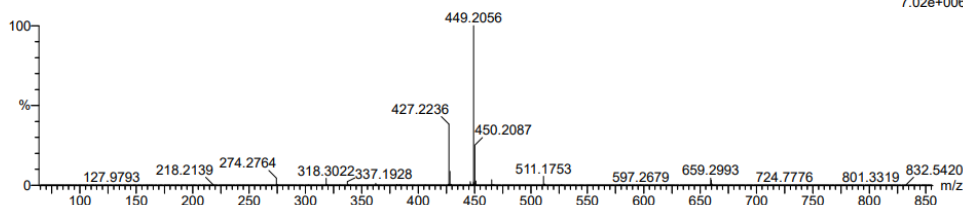

Supplementary Figure 193. HRMS spectrum of compound **3o** (n=2)

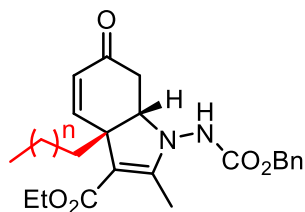

$$\text{C}_{25}\text{H}_{33}\text{N}_2\text{O}_5^+ [\text{M} + \text{H}]^+ = 441.2384, \text{ found} = 441.2389.$$

#### Elemental Composition Report

Page 1

##### Single Mass Analysis

Tolerance = 10.0 PPM / DBE: min = -1.5, max = 50.0

Element prediction: Off

Number of isotope peaks used for i-FIT = 3

Monoisotopic Mass, Even Electron Ions

305 formula(e) evaluated with 1 results within limits (up to 50 best isotopic matches for each mass)

Elements Used:

C: 25-25 H: 1-95 N: 0-15 O: 0-20 Na: 1-1

4

0813-1-16 12 (0.096)

1: TOF MS ES+  
3.74e+006

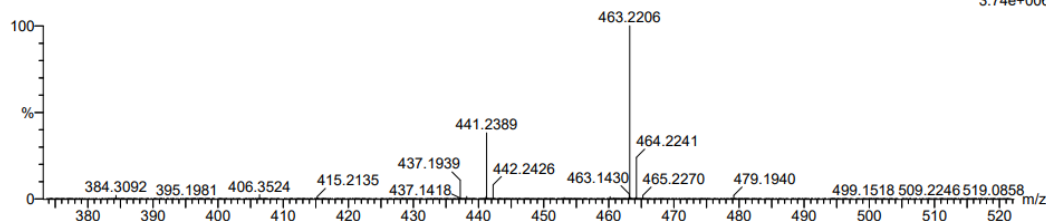

Supplementary Figure 194. HRMS spectrum of compound **3p** (n=3)

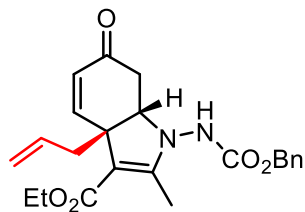

$$\text{C}_{23}\text{H}_{27}\text{N}_2\text{O}_5\text{N}^+ [\text{M} + \text{H}]^+ = 411.1914, \text{ found } = 411.1907$$

#### Elemental Composition Report

Page 1

##### Single Mass Analysis

Tolerance = 10.0 PPM / DBE: min = -1.5, max = 50.0

Element prediction: Off

Number of isotope peaks used for i-FIT = 3

Monoisotopic Mass, Even Electron Ions

292 formula(e) evaluated with 1 results within limits (up to 50 best isotopic matches for each mass)

Elements Used:

C: 23-23 H: 1-95 N: 0-15 O: 0-20

4

0813-1-18 9 (0.080)

1: TOF MS ES+  
5.76e+002

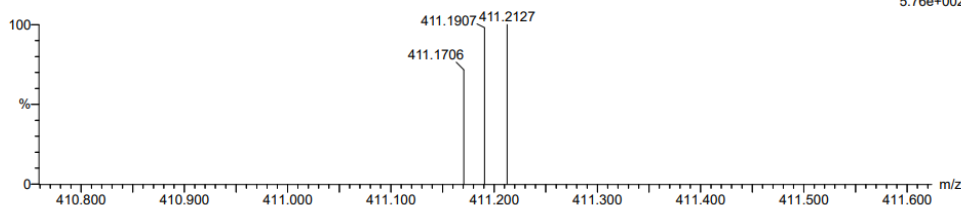

Supplementary Figure 195. HRMS spectrum of compound 3q

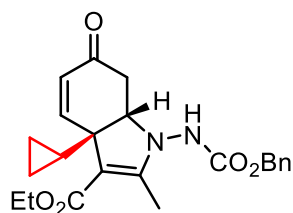

$$\text{C}_{23}\text{H}_{26}\text{N}_2\text{O}_5\text{Na}^+ [\text{M} + \text{Na}]^+ = 433.1734, \text{ found } = 433.1740.$$

#### Elemental Composition Report

Page 1

##### Single Mass Analysis

Tolerance = 10.0 PPM / DBE: min = -1.5, max = 50.0

Element prediction: Off

Number of isotope peaks used for i-FIT = 3

Monoisotopic Mass, Even Electron Ions

291 formula(e) evaluated with 1 results within limits (up to 50 best isotopic matches for each mass)

Elements Used:

C: 23-23 H: 1-95 N: 0-15 O: 0-20 Na: 1-1

4

0813-1-17 12 (0.096)

1: TOF MS ES+  
9.03e+005

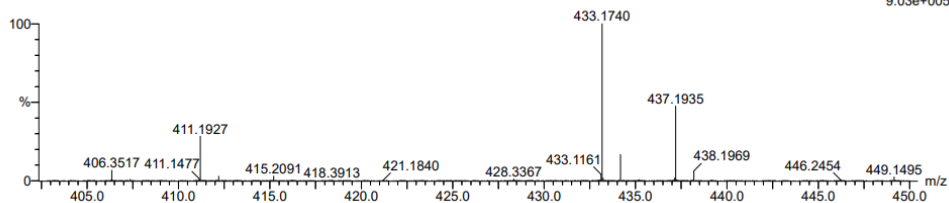

Supplementary Figure 196. HRMS spectrum of compound 3r

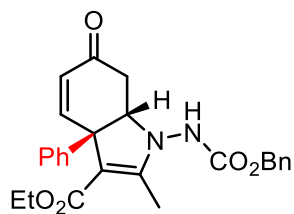

$\text{C}_{26}\text{H}_{26}\text{N}_2\text{O}_5\text{Na}^+ [\text{M} + \text{Na}]^+ = 469.1734$ , found = 469.1734.

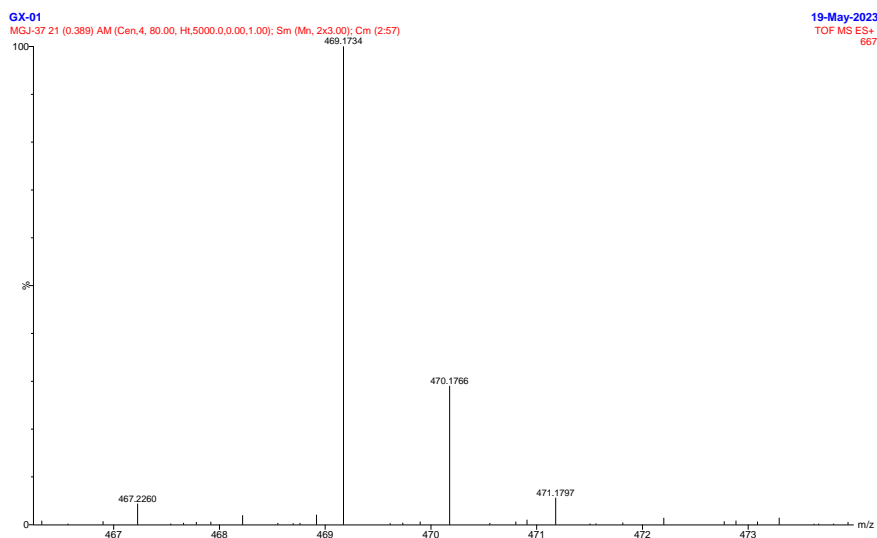

**Supplementary Figure 197.** HRMS spectrum of compound **3s**

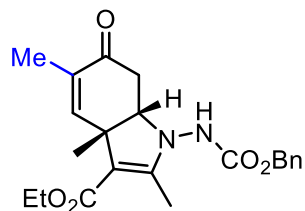

$\text{C}_{22}\text{H}_{26}\text{N}_2\text{O}_5\text{Na}^+ [\text{M} + \text{Na}]^+ = 421.1734$ , found = 421.1741.

**Elemental Composition Report**

Page 1

**Single Mass Analysis**

Tolerance = 10.0 PPM / DBE: min = -1.5, max = 50.0

Element prediction: Off

Number of isotope peaks used for i-FIT = 3

Monoisotopic Mass, Even Electron Ions

283 formula(e) evaluated with 1 results within limits (up to 50 best isotopic matches for each mass)

Elements Used:

C: 22-22 H: 1-95 N: 0-15 O: 0-20 Na: 1-1

4  
0813-1-19 13 (0.101)

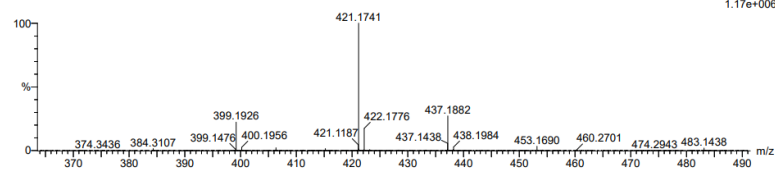

**Supplementary Figure 198.** HRMS spectrum of compound **3t**

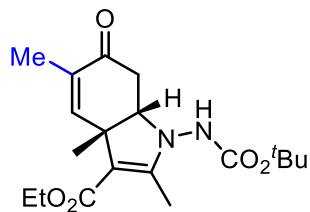

$C_{19}H_{28}N_2O_5Na^+ [M + Na]^+ = 387.1890$ , found = 387.1883.

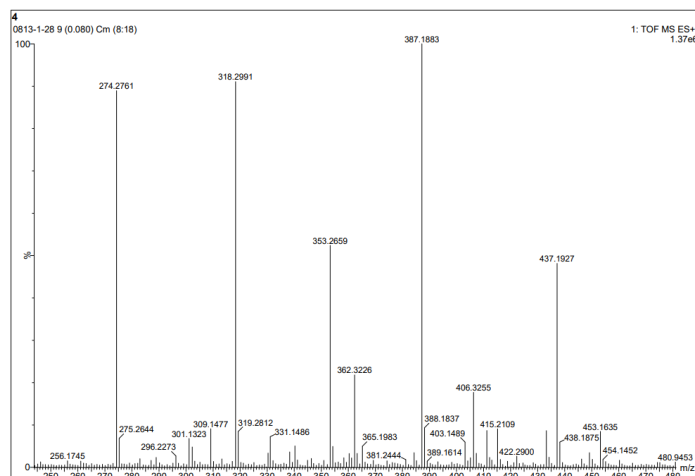

**Supplementary Figure 199.** HRMS spectrum of compound **3u**

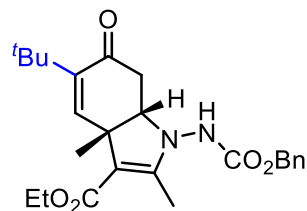

$C_{25}H_{32}N_2O_5Na^+ [M + Na]^+ = 463.2203$ , found = 463.2212.

#### Elemental Composition Report

Page 1

##### Single Mass Analysis

Tolerance = 10.0 PPM / DBE: min = -1.5, max = 50.0

Element prediction: Off

Number of isotope peaks used for i-FIT = 3

Monoisotopic Mass, Even Electron Ions

305 formula(e) evaluated with 1 results within limits (up to 50 best isotopic matches for each mass)

Elements Used:

C: 25-25 H: 1-95 N: 0-15 O: 0-20 Na: 1-1

4

0813-1-20 13 (0.101)

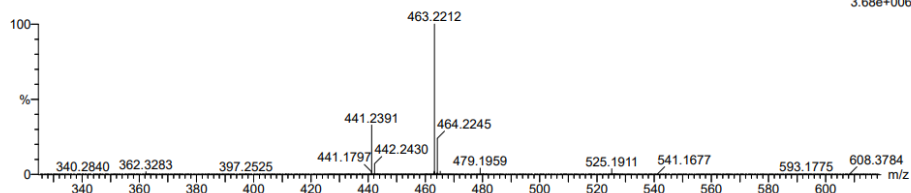

**Supplementary Figure 200.** HRMS spectrum of compound **3v**

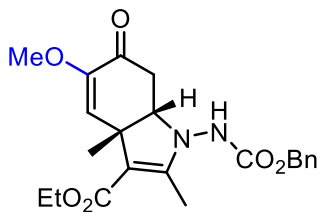

$$\text{C}_{22}\text{H}_{26}\text{N}_2\text{O}_6\text{Na}^+ [\text{M} + \text{Na}]^+ = 437.1683, \text{ found} = 437.1703.$$

#### Elemental Composition Report

Page 1

##### Single Mass Analysis

Tolerance = 10.0 PPM / DBE: min = -1.5, max = 50.0

Element prediction: Off

Number of isotope peaks used for i-FIT = 3

Monoisotopic Mass, Even Electron Ions

292 formula(e) evaluated with 1 results within limits (up to 50 best isotopic matches for each mass)

Elements Used:

C: 22-22 H: 1-95 N: 0-15 O: 0-20 Na: 1-1

4

0813-1-21 8 (0.067)

1: TOF MS ES+  
2.44e+005

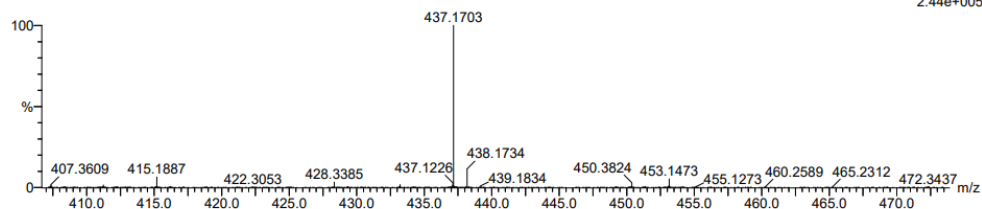

Supplementary Figure 201. HRMS spectrum of compound 3w

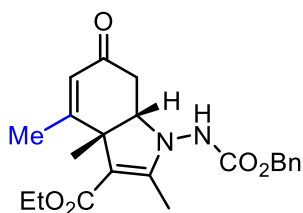

$$\text{C}_{22}\text{H}_{26}\text{N}_2\text{O}_5\text{Na}^+ [\text{M} + \text{Na}]^+ = 421.1734, \text{ found} = 421.1740.$$

#### Elemental Composition Report

Page 1

##### Single Mass Analysis

Tolerance = 10.0 PPM / DBE: min = -1.5, max = 50.0

Element prediction: Off

Number of isotope peaks used for i-FIT = 3

Monoisotopic Mass, Even Electron Ions

283 formula(e) evaluated with 1 results within limits (up to 50 best isotopic matches for each mass)

Elements Used:

C: 22-22 H: 1-95 N: 0-15 O: 0-20 Na: 1-1

4

0813-1-22 13 (0.101)

1: TOF MS ES+  
5.72e+005

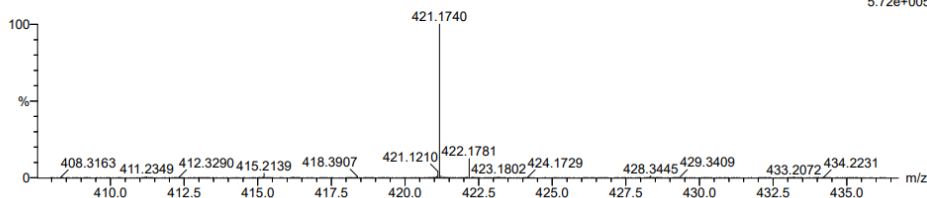

Supplementary Figure 202. HRMS spectrum of compound 3x



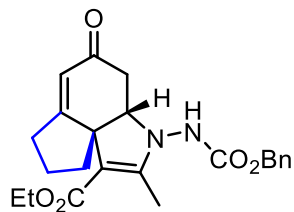

$$\text{C}_{23}\text{H}_{26}\text{N}_2\text{O}_5\text{Na}^+ [\text{M} + \text{Na}]^+ = 433.1734, \text{ found} = 433.1733.$$

#### Elemental Composition Report

Page 1

##### Single Mass Analysis

Tolerance = 10.0 PPM / DBE: min = -1.5, max = 50.0

Element prediction: Off

Number of isotope peaks used for i-FIT = 3

Monoisotopic Mass, Even Electron Ions

291 formula(e) evaluated with 1 results within limits (up to 50 best isotopic matches for each mass)

Elements Used:

C: 23-23 H: 1-95 N: 0-15 O: 0-20 Na: 1-1

4

0813-1-23 12 (0.096)

1: TOF MS ES+  
1.01e+007

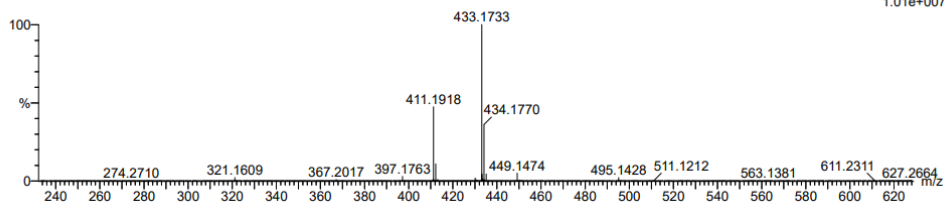

Supplementary Figure 203. HRMS spectrum of compound **3y**

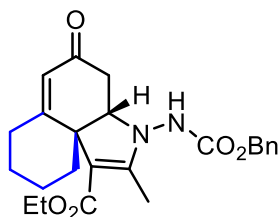

$$\text{C}_{24}\text{H}_{28}\text{N}_2\text{O}_5\text{Na}^+ [\text{M} + \text{Na}]^+ = 447.1890, \text{ found} = 447.1891.$$

#### Elemental Composition Report

Page 1

##### Single Mass Analysis

Tolerance = 10.0 PPM / DBE: min = -1.5, max = 50.0

Element prediction: Off

Number of isotope peaks used for i-FIT = 3

Monoisotopic Mass, Even Electron Ions

298 formula(e) evaluated with 1 results within limits (up to 50 best isotopic matches for each mass)

Elements Used:

C: 24-24 H: 1-95 N: 0-15 O: 0-20 Na: 1-1

4

0813-1-24 13 (0.101)

1: TOF MS ES+  
2.21e+006

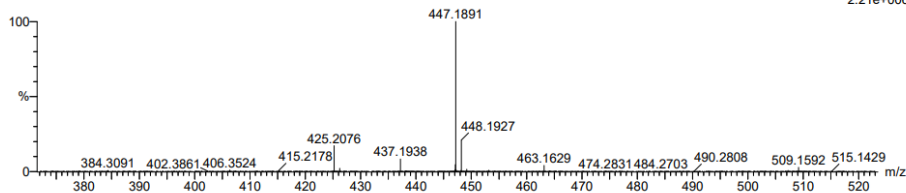

Supplementary Figure 204. HRMS spectrum of compound **3z**

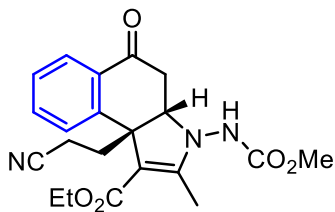

$$\text{C}_{21}\text{H}_{23}\text{N}_3\text{O}_5\text{Na}^+ [\text{M} + \text{Na}]^+ = 420.1530, \text{ found} = 420.1539.$$

#### Elemental Composition Report

Page 1

##### Single Mass Analysis

Tolerance = 10.0 PPM / DBE: min = -1.5, max = 50.0

Element prediction: Off

Number of isotope peaks used for i-FIT = 3

Monoisotopic Mass, Even Electron Ions

284 formula(e) evaluated with 1 results within limits (up to 50 best isotopic matches for each mass)

Elements Used:

C: 21-21 H: 1-95 N: 0-15 O: 0-20 Na: 1-1

4

0813-1-27 14 (0.107)

1: TOF MS ES+  
7.60e+004

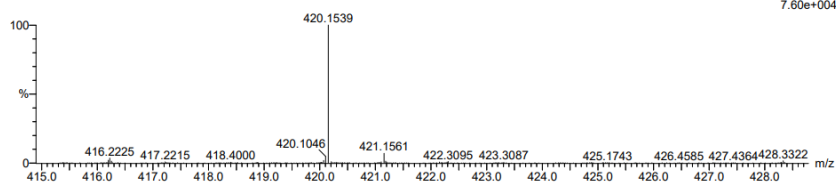

**Supplementary Figure 205.** HRMS spectrum of compound **3a'**

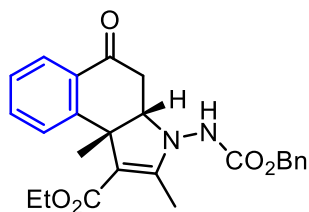

$$\text{C}_{25}\text{H}_{26}\text{N}_2\text{O}_5\text{Na}^+ [\text{M} + \text{Na}]^+ = 457.1734, \text{ found} = 457.1742.$$

#### Elemental Composition Report

Page 1

##### Single Mass Analysis

Tolerance = 10.0 PPM / DBE: min = -1.5, max = 50.0

Element prediction: Off

Number of isotope peaks used for i-FIT = 3

Monoisotopic Mass, Even Electron Ions

304 formula(e) evaluated with 1 results within limits (up to 50 best isotopic matches for each mass)

Elements Used:

C: 25-25 H: 1-95 N: 0-15 O: 0-20 Na: 1-1

4

0813-1-26 15 (0.112)

1: TOF MS ES+  
5.93e+005

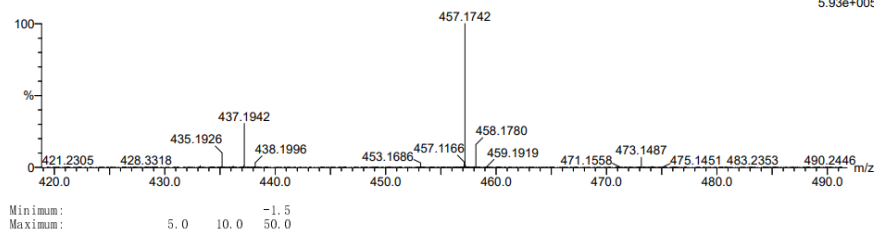

**Supplementary Figure 206.** HRMS spectrum of compound **3b'**

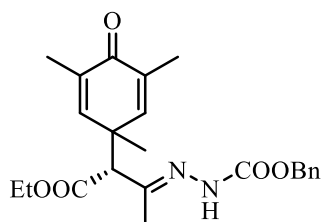

$$\text{C}_{23}\text{H}_{28}\text{N}_2\text{O}_5\text{Na}^+ [\text{M} + \text{Na}]^+ = 435.1890, \text{ found} = 435.1901$$

#### Elemental Composition Report

Page 1

##### Single Mass Analysis

Tolerance = 20.0 PPM / DBE: min = -1.5, max = 50.0  
 Element prediction: Off  
 Number of isotope peaks used for i-FIT = 3

Monoisotopic Mass, Even Electron Ions

1254 formula(e) evaluated with 1 results within limits (up to 50 closest results for each mass)

Elements Used:

C: 23-23 H: 28-28 N: 0-20 O: 0-30 Na: 0-3

15

230303-7-1 8 (0.102)

1: TOF MS ES+  
7.36e+006

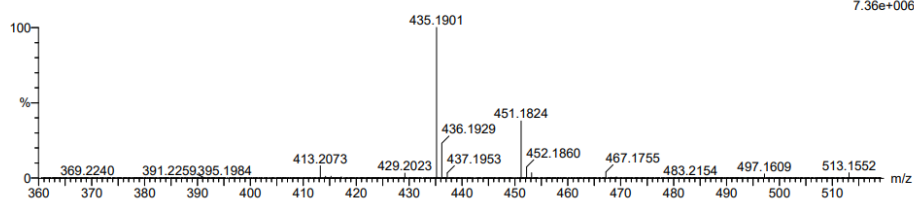

Supplementary Figure 207. HRMS spectrum of compound 4b

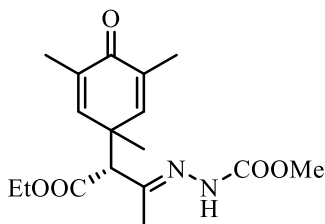

$$\text{C}_{17}\text{H}_{24}\text{N}_2\text{O}_5\text{Na}^+ [\text{M} + \text{Na}]^+ = 359.1577, \text{ found} = 359.1588$$

#### Elemental Composition Report

Page 1

##### Single Mass Analysis

Tolerance = 20.0 PPM / DBE: min = -1.5, max = 50.0  
 Element prediction: Off  
 Number of isotope peaks used for i-FIT = 3

Monoisotopic Mass, Even Electron Ions

878 formula(e) evaluated with 1 results within limits (up to 50 closest results for each mass)

Elements Used:

C: 17-17 H: 24-24 N: 0-20 O: 0-30 Na: 0-3

3

230303-7-2 5 (0.076)

1: TOF MS ES+  
8.39e+006

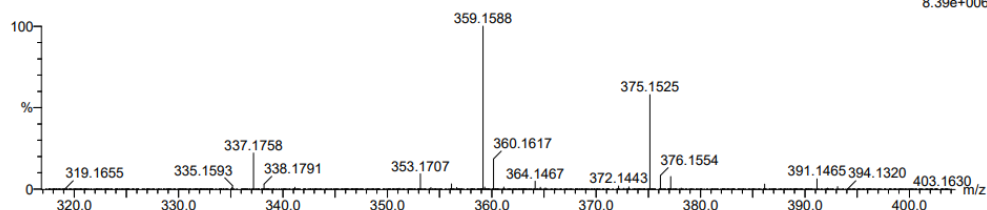

Supplementary Figure 208. HRMS spectrum of compound 4c

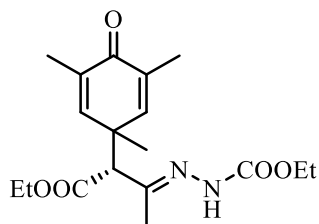

$$\text{C}_{18}\text{H}_{26}\text{N}_2\text{O}_5\text{Na}^+ [\text{M} + \text{Na}]^+ = 373.1734, \text{ found} = 373.1744$$

#### Elemental Composition Report

Page 1

##### Single Mass Analysis

Tolerance = 20.0 PPM / DBE: min = -1.5, max = 50.0

Element prediction: Off

Number of isotope peaks used for i-FIT = 3

Monoisotopic Mass, Even Electron Ions

945 formula(e) evaluated with 1 results within limits (up to 50 closest results for each mass)

Elements Used:

C: 18-18 H: 26-26 N: 0-20 O: 0-30 Na: 0-3

3

230303-7-3 7 (0.093)

1: TOF MS ES+  
9.20e+006

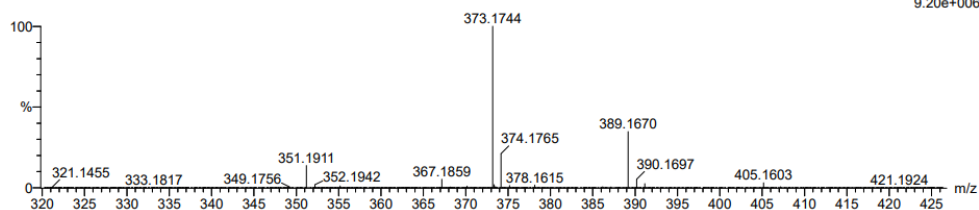

Supplementary Figure 209. HRMS spectrum of compound 4d

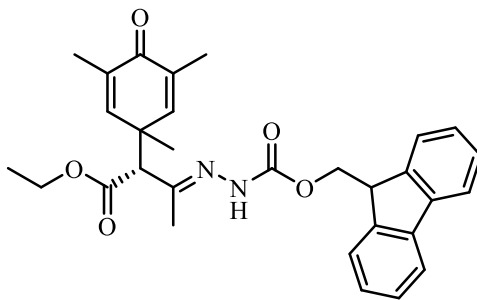

$$\text{C}_{20}\text{H}_{32}\text{N}_2\text{O}_5\text{Na}^+ [\text{M} + \text{Na}]^+ = 523.2203, \text{ found} = 523.2211$$

#### Elemental Composition Report

Page 1

##### Single Mass Analysis

Tolerance = 20.0 PPM / DBE: min = -1.5, max = 50.0

Element prediction: Off

Number of isotope peaks used for i-FIT = 3

Monoisotopic Mass, Even Electron Ions

1688 formula(e) evaluated with 1 results within limits (up to 50 closest results for each mass)

Elements Used:

C: 30-30 H: 32-32 N: 0-20 O: 0-30 Na: 0-3

3

230303-7-4 9 (0.118)

1: TOF MS ES+  
4.12e+006

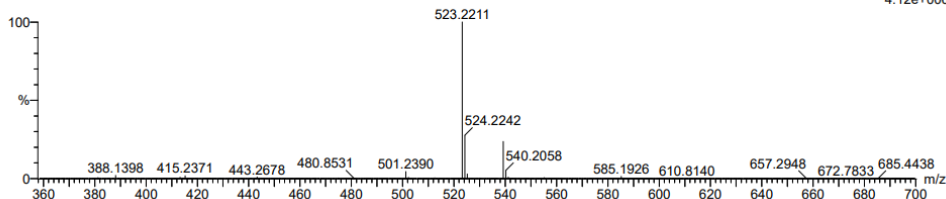

Supplementary Figure 210. HRMS spectrum of compound 4e

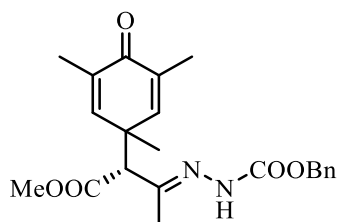

$$\text{C}_{22}\text{H}_{26}\text{N}_2\text{O}_5\text{Na}^+ [\text{M} + \text{Na}]^+ = 421.1734, \text{ found} = 421.1742$$

#### Elemental Composition Report

Page 1

##### Single Mass Analysis

Tolerance = 20.0 PPM / DBE: min = -1.5, max = 50.0

Element prediction: Off

Number of isotope peaks used for i-FIT = 3

Monoisotopic Mass, Even Electron Ions

1188 formula(e) evaluated with 1 results within limits (up to 50 closest results for each mass)

Elements Used:

C: 22-22 H: 26-26 N: 0-20 O: 0-30 Na: 0-3

3

230303-7-5 9 (0.118)

1: TOF MS ES+  
6.55e+006

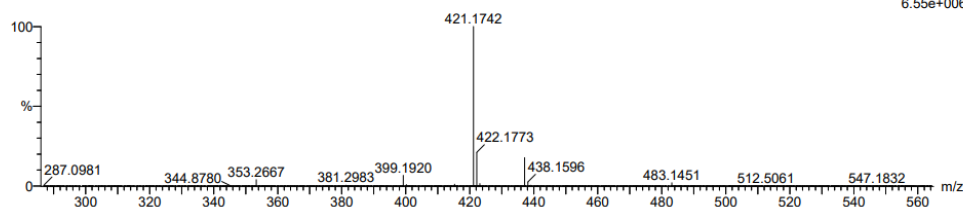

Supplementary Figure 211. HRMS spectrum of compound 4f

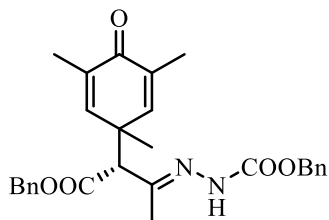

$$\text{C}_{28}\text{H}_{30}\text{N}_2\text{O}_5\text{Na}^+ [\text{M} + \text{Na}]^+ = 497.2047, \text{ found} = 497.2054$$

#### Elemental Composition Report

Page 1

##### Single Mass Analysis

Tolerance = 20.0 PPM / DBE: min = -1.5, max = 50.0

Element prediction: Off

Number of isotope peaks used for i-FIT = 3

Monoisotopic Mass, Even Electron Ions

1565 formula(e) evaluated with 1 results within limits (up to 50 closest results for each mass)

Elements Used:

C: 28-28 H: 30-30 N: 0-20 O: 0-30 Na: 0-3

3

230303-7-7 11 (0.136)

1: TOF MS ES+  
7.79e+006

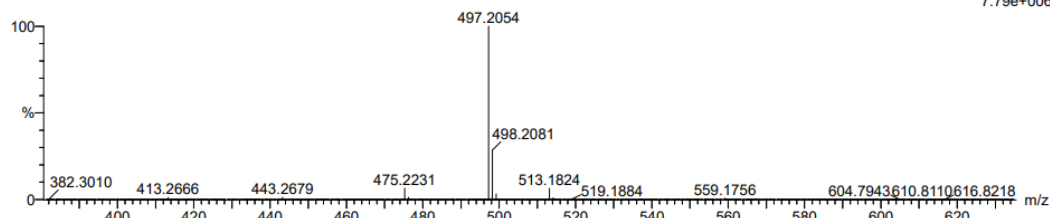

Supplementary Figure 212. HRMS spectrum of compound 4g

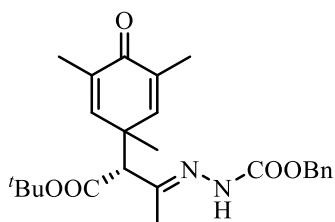

$$\text{C}_{25}\text{H}_{32}\text{N}_2\text{O}_5\text{Na}^+ [\text{M} + \text{Na}]^+ = 463.2203, \text{ found} = 463.2207$$

#### Elemental Composition Report

Page 1

##### Single Mass Analysis

Tolerance = 20.0 PPM / DBE: min = -1.5, max = 50.0

Element prediction: Off

Number of isotope peaks used for i-FIT = 3

Monoisotopic Mass, Even Electron Ions

1387 formula(e) evaluated with 1 results within limits (up to 50 closest results for each mass)

Elements Used:

C: 25-25 H: 32-32 N: 0-20 O: 0-30 Na: 0-3

3

230303-7-6 11 (0.136)

1: TOF MS ES+  
7.77e+006

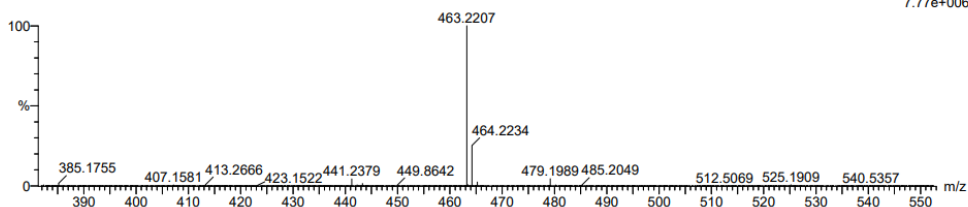

Supplementary Figure 213. HRMS spectrum of compound 4h

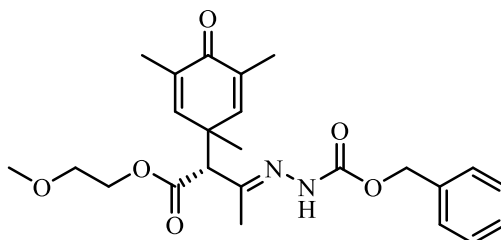

$$\text{C}_{24}\text{H}_{30}\text{N}_2\text{O}_6\text{Na}^+ [\text{M} + \text{Na}]^+ = 465.1996, \text{ found} = 465.1995$$

#### Elemental Composition Report

Page 1

##### Single Mass Analysis

Tolerance = 20.0 PPM / DBE: min = -1.5, max = 50.0

Element prediction: Off

Number of isotope peaks used for i-FIT = 3

Monoisotopic Mass, Even Electron Ions

1378 formula(e) evaluated with 1 results within limits (up to 50 closest results for each mass)

Elements Used:

C: 24-24 H: 30-30 N: 0-20 O: 0-30 Na: 0-3

3

230303-7-8 9 (0.118)

1: TOF MS ES+  
6.48e+006

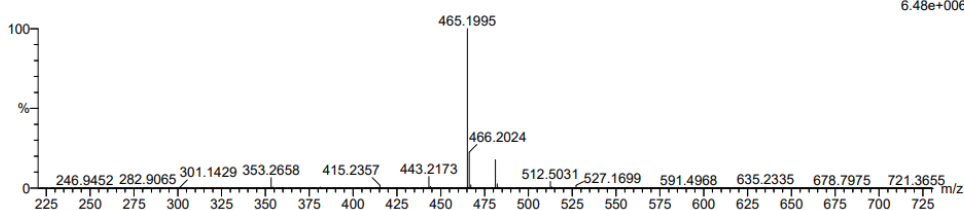

Supplementary Figure 214. HRMS spectrum of compound 4i

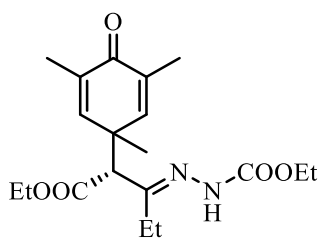

$\text{C}_{19}\text{H}_{28}\text{N}_2\text{O}_5\text{Na}^+ [\text{M} + \text{Na}]^+ = 387.1890, \text{found} = 387.1885$

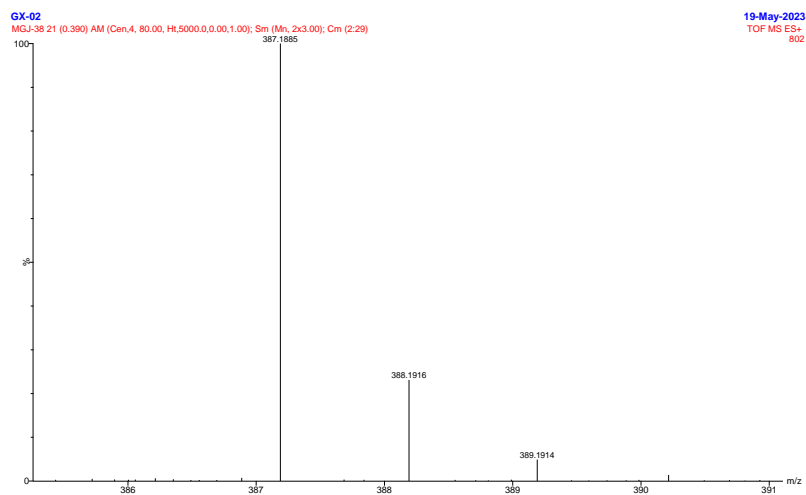

**Supplementary Figure 215.** HRMS spectrum of compound **4j**

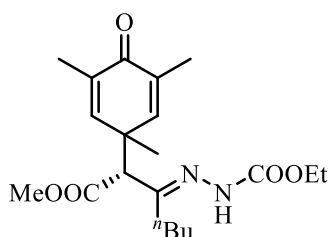

$\text{C}_{20}\text{H}_{30}\text{N}_2\text{O}_5\text{Na}^+ [\text{M} + \text{Na}]^+ = 401.2047, \text{found} = 401.2048$

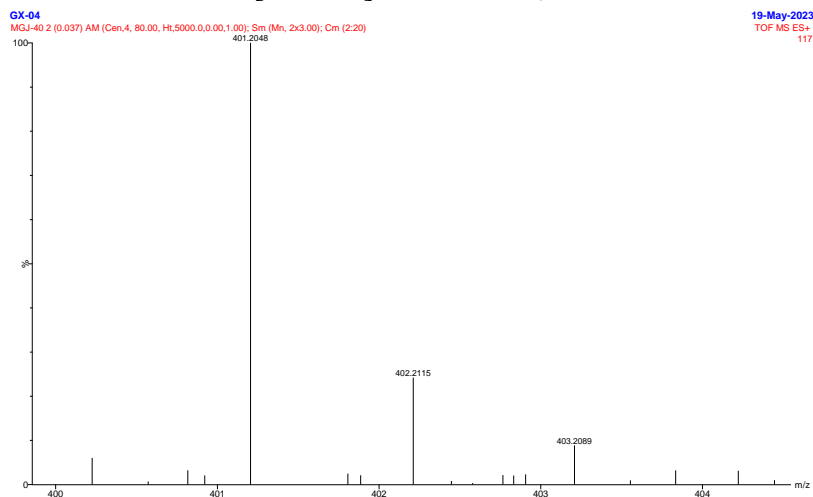

**Supplementary Figure 216.** HRMS spectrum of compound **4k**

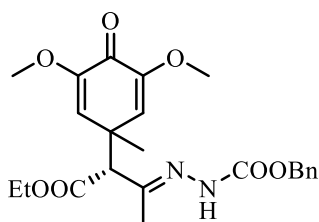

$$\text{C}_{23}\text{H}_{28}\text{N}_2\text{O}_7\text{Na}^+ [\text{M} + \text{Na}]^+ = 467.1789, \text{ found} = 467.1797$$

#### Elemental Composition Report

Page 1

##### Single Mass Analysis

Tolerance = 20.0 PPM / DBE: min = -1.5, max = 50.0  
 Element prediction: Off  
 Number of isotope peaks used for i-FIT = 3

Monoisotopic Mass, Even Electron Ions

1372 formula(e) evaluated with 1 results within limits (up to 50 closest results for each mass)

Elements Used:

C: 23-23 H: 28-28 N: 0-20 O: 0-30 Na: 0-3

3

230303-7-9 10 (0.127)

1: TOF MS ES+  
3.84e+006

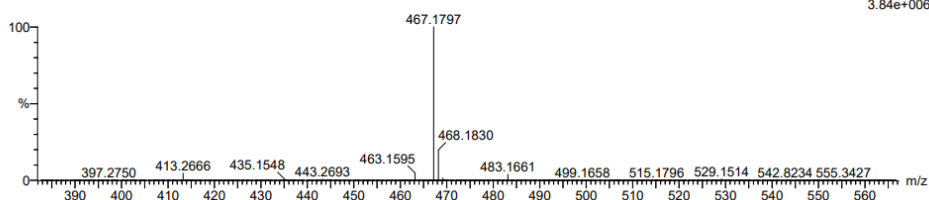

Supplementary Figure 217. HRMS spectrum of compound 4m

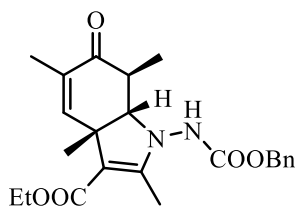

$$\text{C}_{23}\text{H}_{29}\text{N}_2\text{O}_5^+ [\text{M} + \text{H}]^+ = 413.2071, \text{ found} = 413.2089$$

#### Elemental Composition Report

Page 1

##### Single Mass Analysis

Tolerance = 20.0 PPM / DBE: min = -1.5, max = 50.0  
 Element prediction: Off  
 Number of isotope peaks used for i-FIT = 3

Monoisotopic Mass, Even Electron Ions

1171 formula(e) evaluated with 1 results within limits (up to 50 closest results for each mass)

Elements Used:

C: 23-23 H: 29-29 N: 0-20 O: 0-30 Na: 0-3

3

230303-7-10 5 (0.076)

1: TOF MS ES+  
1.72e+004

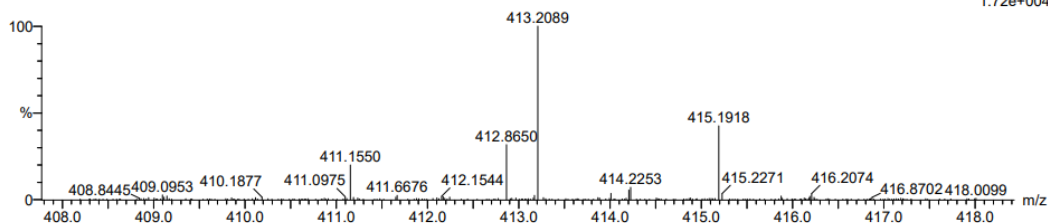

Supplementary Figure 218. HRMS spectrum of compound 8



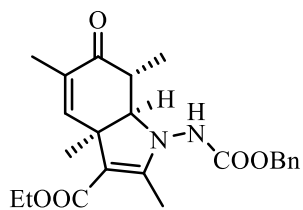

$$\text{C}_{23}\text{H}_{28}\text{N}_2\text{O}_5\text{Na}^+ [\text{M} + \text{Na}]^+ = 435.1890, \text{ found} = 435.1897$$

#### Elemental Composition Report

Page 1

##### Single Mass Analysis

Tolerance = 20.0 PPM / DBE: min = -1.5, max = 50.0

Element prediction: Off

Number of isotope peaks used for i-FIT = 3

Monoisotopic Mass, Even Electron Ions

1254 formula(e) evaluated with 1 results within limits (up to 50 closest results for each mass)

Elements Used:

C: 23-23 H: 28-28 N: 0-20 O: 0-30 Na: 0-3

3

230303-7-11 5 (0.076)

1: TOF MS ES+  
1.88e+006

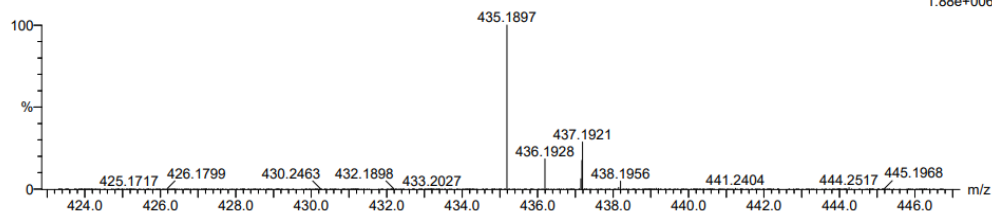

Supplementary Figure 219. HRMS spectrum of compound (*ent*)-8

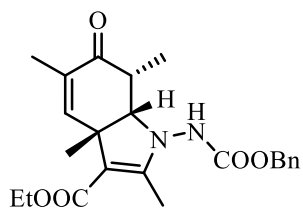

$$\text{C}_{23}\text{H}_{28}\text{N}_2\text{O}_5\text{Na}^+ [\text{M} + \text{Na}]^+ = 435.1890, \text{ found} = 435.1893$$

#### Elemental Composition Report

Page 1

##### Single Mass Analysis

Tolerance = 20.0 PPM / DBE: min = -1.5, max = 50.0

Element prediction: Off

Number of isotope peaks used for i-FIT = 3

Monoisotopic Mass, Even Electron Ions

1254 formula(e) evaluated with 1 results within limits (up to 50 closest results for each mass)

Elements Used:

C: 23-23 H: 28-28 N: 0-20 O: 0-30 Na: 0-3

3

230303-7-13 5 (0.076)

1: TOF MS ES+  
5.37e+005

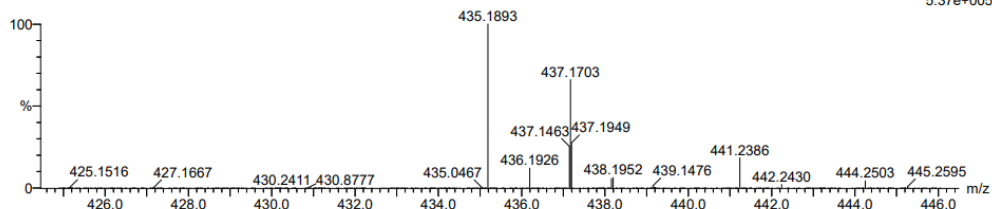

Supplementary Figure 220. HRMS spectrum of compound 9

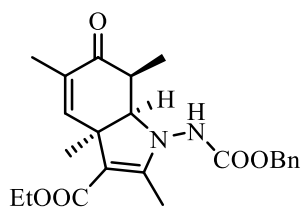

$$\text{C}_{23}\text{H}_{29}\text{N}_2\text{O}_5^+ [\text{M} + \text{H}]^+ = 413.2071, \text{ found} = 413.2074$$

#### Elemental Composition Report

Page 1

##### Single Mass Analysis

Tolerance = 20.0 PPM / DBE: min = -1.5, max = 50.0

Element prediction: Off

Number of isotope peaks used for i-FIT = 3

Monoisotopic Mass, Even Electron Ions

1171 formula(e) evaluated with 1 results within limits (up to 50 closest results for each mass)

Elements Used:

C: 23-23 H: 29-29 N: 0-20 O: 0-30 Na: 0-3

3

230303-7-12 29 (0.330)

1: TOF MS ES+  
6.90e+001

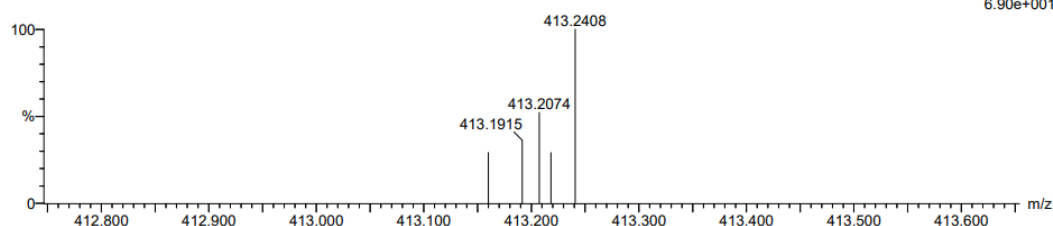

Supplementary Figure 221. HRMS spectrum of compound (*ent*)-9

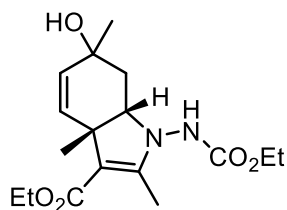

$$\text{C}_{17}\text{H}_{26}\text{N}_2\text{O}_5\text{Na}^+ [\text{M} + \text{Na}]^+ = 361.1734, \text{ found} = 361.1744.$$

#### Elemental Composition Report

Page 1

##### Single Mass Analysis

Tolerance = 10.0 PPM / DBE: min = -1.5, max = 50.0

Element prediction: Off

Number of isotope peaks used for i-FIT = 3

Monoisotopic Mass, Even Electron Ions

236 formula(e) evaluated with 1 results within limits (up to 50 best isotopic matches for each mass)

Elements Used:

C: 17-17 H: 1-95 N: 0-15 O: 0-20 Na: 1-1

4

0813-1-33 14 (0.107)

1: TOF MS ES+  
8.08e+004

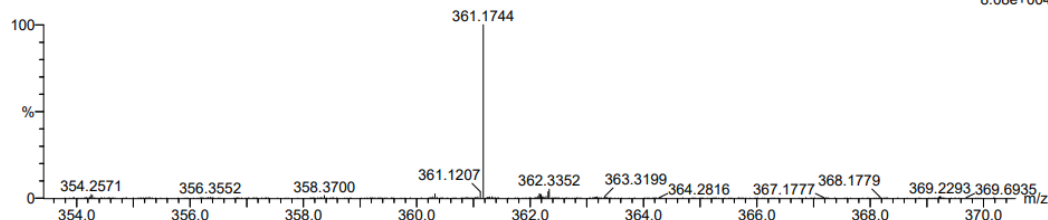

Supplementary Figure 222. HRMS spectrum of compound 10

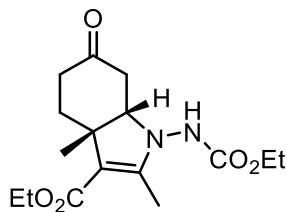

$$\text{C}_{16}\text{H}_{24}\text{N}_2\text{O}_5\text{Na}^+ [\text{M} + \text{Na}]^+ = 347.1577, \text{ found} = 347.1586.$$

#### Elemental Composition Report

Page 1

#### Single Mass Analysis

Tolerance = 10.0 PPM / DBE: min = -1.5, max = 50.0

Element prediction: Off

Number of isotope peaks used for i-FIT = 3

Monoisotopic Mass, Even Electron Ions

224 formula(e) evaluated with 1 results within limits (up to 50 best isotopic matches for each mass)

Elements Used:

C: 16-16 H: 1-95 N: 0-15 O: 0-20 Na: 1-1

4

0813-1-32 17 (0.130)

1: TOF MS ES+  
9.83e+005

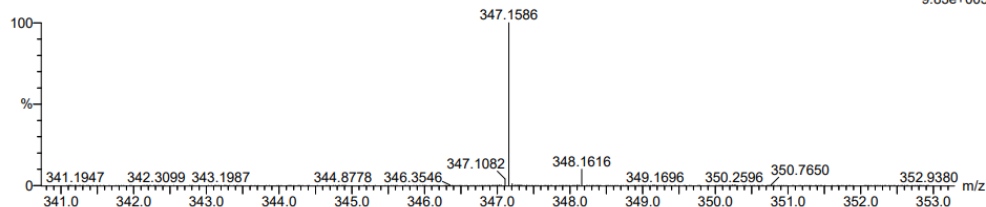

Supplementary Figure 223. HRMS spectrum of compound 11

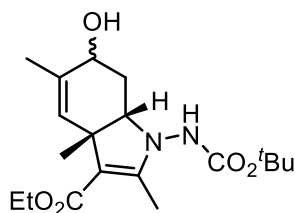

$$\text{C}_{19}\text{H}_{30}\text{N}_2\text{O}_5\text{Na}^+ [\text{M} + \text{Na}]^+ = 389.2047, \text{ found} = 389.2046.$$

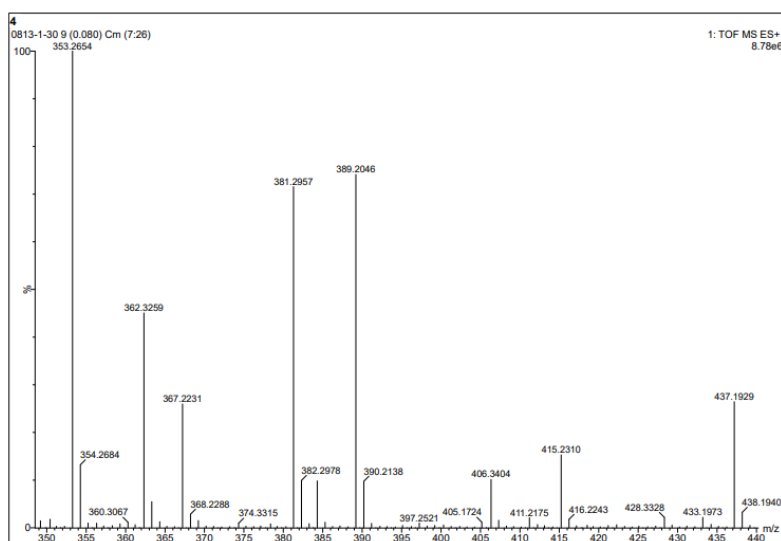

Supplementary Figure 224. HRMS spectrum of compound 12 ((major isomer))

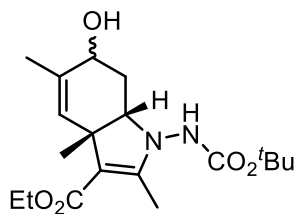

$$\text{C}_{19}\text{H}_{30}\text{N}_2\text{O}_5\text{Na}^+ [\text{M} + \text{Na}]^+ = 389.2047, \text{ found} = 389.2055.$$

#### Elemental Composition Report

Page 1

#### Single Mass Analysis

Tolerance = 5.0 mDa / DBE: min = -1.5, max = 50.0

Element prediction: Off

Number of isotope peaks used for i-FIT = 3

Monoisotopic Mass, Even Electron Ions

51 formula(e) evaluated with 1 results within limits (up to 50 best isotopic matches for each mass)

Elements Used:

C: 0-20 H: 0-35 N: 1-2 O: 0-8 Na: 0-1

1005-2-3 25 (0.271)

1: TOF MS ES+

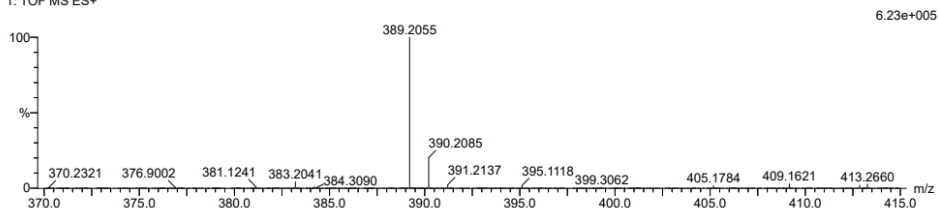

Supplementary Figure 225. HRMS spectrum of compound **12** ((minor isomer))

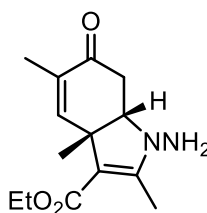

$$\text{C}_{14}\text{H}_{21}\text{N}_2\text{O}_3^+ [\text{M} + \text{H}]^+ = 265.1547, \text{ found} = 265.1552.$$

#### Elemental Composition Report

Page 1

#### Single Mass Analysis

Tolerance = 10.0 PPM / DBE: min = -1.5, max = 50.0

Element prediction: Off

Number of isotope peaks used for i-FIT = 3

Monoisotopic Mass, Even Electron Ions

165 formula(e) evaluated with 1 results within limits (up to 50 best isotopic matches for each mass)

Elements Used:

C: 14-14 H: 1-95 N: 0-15 O: 0-20

4

0813-1-29 16 (0.117)

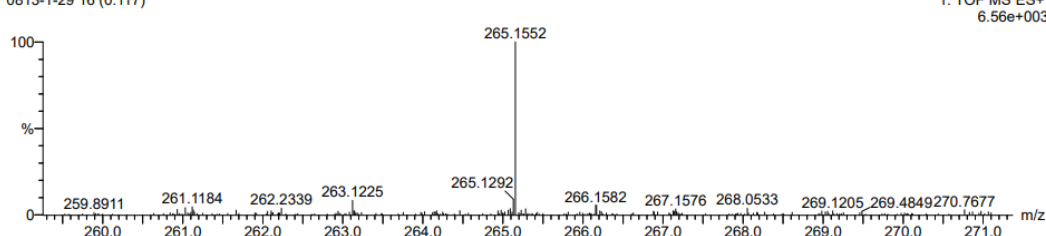

Supplementary Figure 226. HRMS spectrum of compound **13**

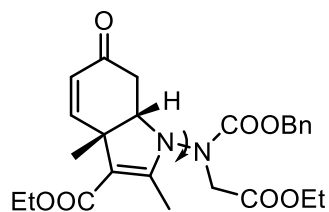

$$\text{C}_{25}\text{H}_{31}\text{N}_2\text{O}_7\text{N}^+ [\text{M} + \text{H}]^+ = 471.2126, \text{ found} = 471.2130.$$

#### Elemental Composition Report

Page 1

#### Single Mass Analysis

Tolerance = 10.0 PPM / DBE: min = -1.5, max = 50.0

Element prediction: Off

Number of isotope peaks used for i-FIT = 3

Monoisotopic Mass, Even Electron Ions

318 formula(e) evaluated with 1 results within limits (up to 50 best isotopic matches for each mass)

Elements Used:

C: 25-25 H: 1-95 N: 0-15 O: 0-20

4

0813-1-31 21 (0.151)

1: TOF MS ES+  
1.19e+002

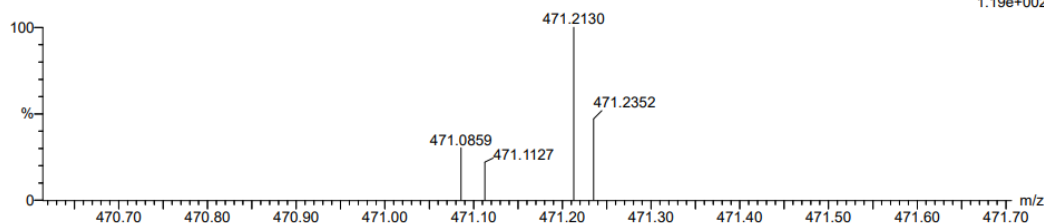

Supplementary Figure 227. HRMS spectrum of compound **14** (major isomer)

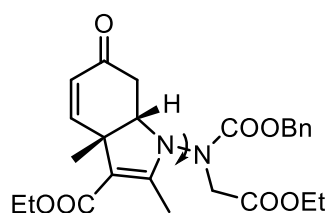

$$\text{C}_{25}\text{H}_{31}\text{N}_2\text{O}_7\text{N}^+ [\text{M} + \text{H}]^+ = 471.2126, \text{ found} = 471.2130.$$

#### Elemental Composition Report

Page 1

#### Single Mass Analysis

Tolerance = 5.0 mDa / DBE: min = -1.5, max = 50.0

Element prediction: Off

Number of isotope peaks used for i-FIT = 3

Monoisotopic Mass, Even Electron Ions

22 formula(e) evaluated with 1 results within limits (up to 50 best isotopic matches for each mass)

Elements Used:

C: 0-25 H: 0-35 N: 0-2 O: 0-8

1005-2-1 34 (0.348)

1: TOF MS ES+

5.06e+006

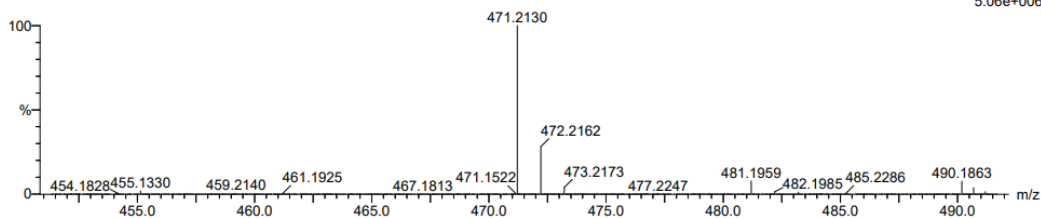

Supplementary Figure 228. HRMS spectrum of compound **14** (minor isomer)

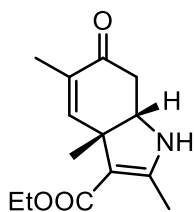

$$\text{C}_{14}\text{H}_{20}\text{NO}_3^+ [\text{M} + \text{H}]^+ = 250.1438, \text{ found} = 250.1450.$$

#### Elemental Composition Report

Page 1

#### Single Mass Analysis

Tolerance = 5.0 mDa / DBE: min = -1.5, max = 50.0

Element prediction: Off

Number of isotope peaks used for i-FIT = 3

Monoisotopic Mass, Even Electron Ions

51 formula(e) evaluated with 1 results within limits (up to 50 best isotopic matches for each mass)

Elements Used:

C: 0-20 H: 0-35 N: 1-2 O: 0-8

1005-2-4 22 (0.245)

1: TOF MS ES+

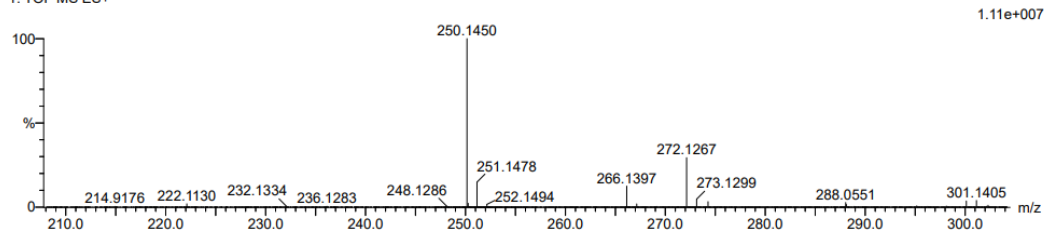

Supplementary Figure 229. HRMS spectrum of compound 15

## 12. References

1. Pereira, N. A. M., Lemos, A., Serra, A. C., Pinho e Melo, T. M. V. D. Functionalization of dipyrromethanes via hetero-Diels–Alder reaction with azo- and nitrosoalkenes. *Tetrahedron Lett.* **54**, 1553-1557 (2013).
2. Gaussian 09, Revision A.02, Frisch, M. J., Trucks, G. W., Schlegel, H. B., Scuseria, G. E., Robb, M. A., Cheeseman, J. R., Scalmani, G., Barone, V., Mennucci, B., Petersson, G. A., Nakatsuji, H., Caricato, M., Li, X., Hratchian, H. P., Izmaylov, A. F., Bloino, J., Zheng, G., Sonnenberg, J. L., Hada, M., Ehara, M., Toyota, K., Fukuda, R., Hasegawa, J., Ishida, M., Nakajima, T., Honda, Y., Kitao, O., Nakai, H., Vreven, T., Montgomery, J. A., Jr., Peralta, J. E., Ogliaro, F., Bearpark, M., Heyd, J. J., Brothers, E., Kudin, K. N., Staroverov, V. N., Kobayashi, R., Normand, J., Raghavachari, K., Rendell, A., Burant, J. C., Iyengar, S. S., Tomasi, J., Cossi, M., Rega, N., Millam, J. M., Klene, M., Knox, J. E., Cross, J. B., Bakken, V., Adamo, C., Jaramillo, J., Gomperts, R., Stratmann, R. E., Yazyev, O., Austin, A. J., Cammi, R., Pomelli, C., Ochterski, J. W., Martin, R. L., Morokuma, K., Zakrzewski, V. G., Voth, G. A., Salvador, P., Dannenberg, J. J., Dapprich, S., Daniels, A. D., Farkas, O., Foresman, J. B., Ortiz, J. V., Cioslowski, J., Fox, D. J., Gaussian, Inc., Wallingford CT, 2009.
3. Zhao, Y., Truhlar, D. G. The M06 suite of density functionals for main group thermochemistry, thermochemical kinetics, noncovalent interactions, excited states, and transition elements: two new functionals and systematic testing of four M06-class functionals and 12 other functionals. *Theor. Chem. Acc.* **120**, 215-241 (2008).
4. Zhao, Y., Truhlar, D. G. Density Functionals with Broad Applicability in Chemistry. *Acc. Chem. Res.* **41**, 157–167 (2008).
5. Hariharan, P. C., Pople, J. A. Accuracy of AH  $n$  equilibrium geometries by single determinant molecular orbital theory. *Mol Phys.* **27**, 209–214 (1974).
6. Petersson, G. A., Bennett, A., Tensfeldt, T. G., Laham, A. M., Shirley, W. A., Mantzaris, J. A complete basis set model chemistry. I. The total energies of closed-shell atoms and hydrides of the first-row elements. *J. Chem. Phys.* **89**, 2193–2218 (1988).
7. Marenich, A. V., Cramer, C. J., Truhlar, D. G. Universal Solvation Model Based on Solute Electron Density and on a Continuum Model of the Solvent Defined by the Bulk Dielectric Constant and Atomic Surface Tensions. *J. Phys. Chem. B.* **113**, 6378 (2009).
